# Supplementary material for: The microbiome of the branching coral Acropora kenti
Source: Research Square preprint supplement (doi:10.21203/rs.3.rs-3228011/v1), 2023-08-08
Supplement: Supplementary file 1 [file 340d2eeb2c8860a6a989d754.xlsx]

## Sheet: refined_dereplicated_MAGs
Sample_type	Island_origin	MAG_name	Specificity	Completeness(%)	Contamination(%)	Quality(Comp. - 3x Con.)	Quality(Comp. - 5x Con.)	Strain_heterogeneity	Genome_size(bp)	GC_content(%)	Coding_density(%)	No._predicted_genes	Classification
A.kenti	Fitzroy	Fitzroy_MAG2	A.kenti_specific	99.41	0	99.41	99.41	0	3893778	54.98	90.53	3726	d__Bacteria;p__Desulfobacterota;c__Desulfovibrionia;o__Desulfovibrionales;f__Desulfovibrionaceae;g__Pseudodesulfovibrio;s__
A.kenti	Fitzroy	Fitzroy_MAG3	A.kenti_specific	100	2.26	93.22	88.7	0	6535837	55.65	90.47	5660	d__Bacteria;p__Desulfobacterota;c__Desulfobacteria;o__Desulfobacterales;f__Desulfobacteraceae;g__Desulfobacter;s__
A.kenti	Fitzroy	Fitzroy_MAG4	A.kenti_specific	98.29	2.74	90.07	84.59	0	6149170	53.48	89.19	5515	d__Bacteria;p__Desulfobacterota;c__Desulfobacteria;o__Desulfobacterales;f__Desulfobacteraceae;g__Desulfobacter;s__
A.kenti	Fitzroy	Fitzroy_MAG5	A.kenti_specific	100	2.53	92.41	87.35	0	4640030	34.45	90.87	4011	d__Bacteria;p__Bacteroidota;c__Ignavibacteria;o__Ignavibacteriales;f__Melioribacteraceae;g__;s__
A.kenti	Fitzroy	Fitzroy_MAG7	A.kenti_specific	95.67	1.14	92.25	89.97	14.29	4058501	49.79	85.51	3483	d__Bacteria;p__Proteobacteria;c__Gammaproteobacteria;o__Pseudomonadales;f__Endozoicomonadaceae;g__Endozoicomonas;s__
A.kenti	Fitzroy	Fitzroy_MAG8	seawater_specific	81.93	0.96	79.05	77.13	80	1615028	62.71	91.87	2011	d__Bacteria;p__Cyanobacteria;c__Cyanobacteriia;o__PCC-6307;f__Cyanobiaceae;g__Synechococcus_E;s__Synechococcus_E sp002724845
A.kenti	Fitzroy	Fitzroy_MAG10	A.kenti_specific	97.87	5.79	80.5	68.92	0	5486181	35.52	91.73	5178	d__Bacteria;p__Firmicutes_A;c__Clostridia;o__Peptostreptococcales;f__Acidaminobacteraceae;g__JABXKX01;s__
A.kenti	Fitzroy	Fitzroy_MAG11	A.kenti_specific	87.84	0.25	87.09	86.59	0	768112	32.38	88.66	689	d__Bacteria;p__Firmicutes;c__Bacilli;o__Mycoplasmatales;f__Mycoplasmataceae;g__;s__
A.kenti	Fitzroy	Fitzroy_MAG12	A.kenti_specific	92.37	1.18	88.83	86.47	33.33	3398183	51.22	86.52	3153	d__Bacteria;p__Desulfobacterota;c__Desulfovibrionia;o__Desulfovibrionales;f__Desulfovibrionaceae;g__;s__
A.kenti	Fitzroy	Fitzroy_MAG13	A.kenti_specific	100	0	100	100	0	1524879	42.6	91.96	1487	d__Bacteria;p__Proteobacteria;c__Alphaproteobacteria;o__;f__;g__;s__
A.kenti	Fitzroy	Fitzroy_MAG14	A.kenti_specific	99.81	0.56	98.13	97.01	0	4108376	65.62	90.78	3782	d__Bacteria;p__Proteobacteria;c__Gammaproteobacteria;o__Pseudomonadales;f__Alcanivoracaceae;g__Alcanivorax;s__
A.kenti	Fitzroy	Fitzroy_MAG15	A.kenti_specific	80.62	1.47	76.21	73.27	54.55	1588365	31.86	93.8	1524	d__Bacteria;p__Bacteroidota;c__Bacteroidia;o__Flavobacteriales;f__Flavobacteriaceae;g__DT-33;s__
A.kenti	Fitzroy	Fitzroy_MAG17	A.kenti_specific	96.95	2.24	90.23	85.75	23.08	4612262	48.25	84.12	4222	d__Bacteria;p__Proteobacteria;c__Gammaproteobacteria;o__Pseudomonadales;f__Endozoicomonadaceae;g__Endozoicomonas;s__
A.kenti	Fitzroy	Fitzroy_MAG19	seawater_specific	81.97	1.9	76.27	72.47	62.5	1592910	62.75	92.44	2021	d__Bacteria;p__Cyanobacteria;c__Cyanobacteriia;o__PCC-6307;f__Cyanobiaceae;g__Synechococcus_E;s__Synechococcus_E sp002724845
A.kenti	Fitzroy	Fitzroy_MAG20	A.kenti_specific	83.71	0.09	83.44	83.26	0	1993571	60	89.84	2207	d__Bacteria;p__Actinobacteriota;c__Actinomycetia;o__Propionibacteriales;f__Propionibacteriaceae;g__Cutibacterium;s__Cutibacterium acnes
A.kenti	Fitzroy	Fitzroy_MAG23	A.kenti_specific	92.91	0.68	90.87	89.51	0	1262569	44.13	87.91	1113	d__Bacteria;p__Chlamydiota;c__Chlamydiia;o__Chlamydiales;f__Simkaniaceae;g__Simkania;s__
A.kenti	Fitzroy	Fitzroy_MAG24	A.kenti_specific	96.77	0	96.77	96.77	0	2074405	38.38	93.93	1917	d__Bacteria;p__Proteobacteria;c__Alphaproteobacteria;o__JABSOH01;f__;g__;s__
A.kenti	Fitzroy	Fitzroy_MAG27	seawater_specific	92.59	8.5	67.09	50.09	50	1706777	62.8	92.05	2155	d__Bacteria;p__Cyanobacteria;c__Cyanobacteriia;o__PCC-6307;f__Cyanobiaceae;g__Synechococcus_E;s__Synechococcus_E sp002724845
A.kenti	Dunk	Dunk_MAG1	A.kenti_specific	100	0.93	97.21	95.35	50	4245504	65.29	90.54	3893	d__Bacteria;p__Proteobacteria;c__Gammaproteobacteria;o__Pseudomonadales;f__Alcanivoracaceae;g__Alcanivorax;s__
A.kenti	Dunk	Dunk_MAG2	seawater_specific	86.89	1.6	82.09	78.89	16.67	2997217	59.86	91.39	3089	d__Bacteria;p__Proteobacteria;c__Gammaproteobacteria;o__Pseudomonadales;f__Halieaceae;g__Luminiphilus;s__Luminiphilus sp012270045
A.kenti	Dunk	Dunk_MAG4	A.kenti_specific	89.42	1.1	86.12	83.92	12.5	3753423	49.87	87.23	3634	d__Bacteria;p__Proteobacteria;c__Gammaproteobacteria;o__Pseudomonadales;f__Endozoicomonadaceae;g__Endozoicomonas;s__
A.kenti	Dunk	Dunk_MAG6	seawater_specific	75.1	3.62	64.24	57	60	1736296	61	91.45	2174	d__Bacteria;p__Cyanobacteria;c__Cyanobacteriia;o__PCC-6307;f__Cyanobiaceae;g__Synechococcus_C;s__
A.kenti	Dunk	Dunk_MAG10	A.kenti_specific	89.41	3.11	80.08	73.86	50	2789319	60.16	92.31	2882	d__Bacteria;p__Proteobacteria;c__Gammaproteobacteria;o__Pseudomonadales;f__Halieaceae;g__Luminiphilus;s__Luminiphilus sp012270045
A.kenti	Russell	Russell_MAG1	A.kenti_specific	97.95	0.84	95.43	93.75	0	5670264	47.95	87.14	4339	d__Bacteria;p__Proteobacteria;c__Gammaproteobacteria;o__Pseudomonadales;f__Endozoicomonadaceae;g__Endozoicomonas;s__
A.kenti	Russell	Russell_MAG2	A.kenti_specific	93.56	4.11	81.23	73.01	15.38	3203178	60.51	92.38	3027	d__Bacteria;p__Proteobacteria;c__Gammaproteobacteria;o__Xanthomonadales;f__SZUA-36;g__WTJD01;s__WTJD01 sp011524975
A.kenti	Russell	Russell_MAG3	A.kenti_specific	91.94	4.37	78.83	70.09	47.37	2989692	56.55	92.19	3095	d__Bacteria;p__Proteobacteria;c__Gammaproteobacteria;o__Pseudomonadales;f__Halieaceae;g__Halioglobus;s__
A.kenti	Russell	Russell_MAG5	seawater_specific	93.34	1.09	90.07	87.89	60	2127196	60.69	90.91	2461	d__Bacteria;p__Cyanobacteria;c__Cyanobacteriia;o__PCC-6307;f__Cyanobiaceae;g__Synechococcus_C;s__
A.kenti	Russell	Russell_MAG7	A.kenti_specific	81.18	2.72	73.02	67.58	75	2676347	48.55	88.43	2547	d__Bacteria;p__Verrucomicrobiota;c__Verrucomicrobiae;o__Verrucomicrobiales;f__Akkermansiaceae;g__Rubritalea;s__
A.kenti	Russell	Russell_MAG10	A.kenti_specific	80.35	0.65	78.4	77.1	100	1898427	52.41	93.69	2129	d__Bacteria;p__Proteobacteria;c__Alphaproteobacteria;o__Sphingomonadales;f__SMXR01;g__SMXR01;s__
A.kenti	Russell	Russell_MAG11	A.kenti_specific	83.12	4.42	69.86	61.02	42.86	3527211	53.95	91.59	3633	d__Bacteria;p__Proteobacteria;c__Alphaproteobacteria;o__Minwuiales;f__Minwuiaceae;g__;s__
A.kenti	Russell	Russell_MAG12	A.kenti_specific	95.83	1.25	92.08	89.58	0	4124063	49.75	85.32	3544	d__Bacteria;p__Proteobacteria;c__Gammaproteobacteria;o__Pseudomonadales;f__Endozoicomonadaceae;g__Endozoicomonas;s__
A.kenti	Russell	Russell_MAG19	A.kenti_specific	97.62	1.77	92.31	88.77	11.11	3304984	32.5	91.53	3351	d__Bacteria;p__Bacteroidota;c__Bacteroidia;o__Flavobacteriales;f__Flavobacteriaceae;g__Winogradskyella;s__
A.kenti	Russell	Russell_MAG20	A.kenti_specific	91.94	1.54	87.32	84.24	80	3081641	60.13	91.43	3074	d__Bacteria;p__Proteobacteria;c__Gammaproteobacteria;o__Pseudomonadales;f__Halieaceae;g__Luminiphilus;s__Luminiphilus sp012270045
A.kenti	Russell	Russell_MAG22	A.kenti_specific	81.87	0.17	81.36	81.02	0	1653816	31.77	94.5	1535	d__Bacteria;p__Bacteroidota;c__Bacteroidia;o__Flavobacteriales;f__Flavobacteriaceae;g__DT-33;s__
A.kenti	Russell	Russell_MAG23	A.kenti_specific	80.51	0.36	79.43	78.71	20	1433321	62.41	93.22	1520	d__Bacteria;p__Proteobacteria;c__Gammaproteobacteria;o__AqS2;f__;g__;s__
A.kenti	Russell	Russell_MAG24	seawater_specific	75.34	1.04	72.22	70.14	100	1553853	62.84	92.35	1981	d__Bacteria;p__Cyanobacteria;c__Cyanobacteriia;o__PCC-6307;f__Cyanobiaceae;g__RCC307;s__RCC307 sp012270465
A.kenti	Russell	Russell_MAG25	A.kenti_specific	95.95	2.71	87.82	82.4	25	3048522	63.45	91.48	3059	d__Bacteria;p__Proteobacteria;c__Alphaproteobacteria;o__Rhodobacterales;f__Rhodobacteraceae;g__SZUA-547;s__
A.kenti	Russell	Russell_MAG29	seawater_specific	77.85	2.4	70.65	65.85	100	1606548	62.62	92.1	2087	d__Bacteria;p__Cyanobacteria;c__Cyanobacteriia;o__PCC-6307;f__Cyanobiaceae;g__RCC307;s__RCC307 sp012270465
A.kenti	Russell	Russell_MAG30	A.kenti_specific	88.05	0.82	85.59	83.95	33.33	2208770	60.12	89.96	2341	d__Bacteria;p__Actinobacteriota;c__Actinomycetia;o__Propionibacteriales;f__Propionibacteriaceae;g__Cutibacterium;s__Cutibacterium acnes
A.kenti	Pandora	Pandora_MAG5	A.kenti_specific	100	0.56	98.32	97.2	0	4218807	65.36	90.61	3874	d__Bacteria;p__Proteobacteria;c__Gammaproteobacteria;o__Pseudomonadales;f__Alcanivoracaceae;g__Alcanivorax;s__
A.kenti	Pandora	Pandora_MAG8	seawater_specific	93.8	0.68	91.76	90.4	100	1874074	62.45	91.4	2234	d__Bacteria;p__Cyanobacteria;c__Cyanobacteriia;o__PCC-6307;f__Cyanobiaceae;g__Synechococcus_E;s__Synechococcus_E sp002724845
A.kenti	Magnetic	Magnetic_MAG1	A.kenti_specific	89.7	0	89.7	89.7	0	1960406	43.42	88.52	1992	d__Bacteria;p__Proteobacteria;c__Gammaproteobacteria;o__LLD-282;f__LLD-282;g__;s__
A.kenti	Magnetic	Magnetic_MAG3	A.kenti_specific	82.43	0.34	81.41	80.73	0	1702676	31.66	94.35	1655	d__Bacteria;p__Bacteroidota;c__Bacteroidia;o__Flavobacteriales;f__Flavobacteriaceae;g__DT-33;s__
A.kenti	Magnetic	Magnetic_MAG4	A.kenti_specific	90.87	5.1	75.57	65.37	22.22	2565785	48.43	90.97	2579	d__Bacteria;p__Verrucomicrobiota;c__Verrucomicrobiae;o__Verrucomicrobiales;f__Akkermansiaceae;g__Rubritalea;s__
A.kenti	Magnetic	Magnetic_MAG5	A.kenti_specific	83.22	2.27	76.41	71.87	0	1840915	57.53	87.25	2042	d__Bacteria;p__Nitrospirota;c__Nitrospiria;o__Nitrospirales;f__UBA8639;g__Bin75;s__
A.kenti	Magnetic	Magnetic_MAG7	A.kenti_specific	97.17	2.12	90.81	86.57	7.69	3676631	35.41	88.4	3132	d__Bacteria;p__Bacteroidota;c__Bacteroidia;o__Flavobacteriales;f__Flavobacteriaceae;g__Flaviramulus_A;s__
A.kenti	Magnetic	Magnetic_MAG10	A.kenti_specific	96.85	0.61	95.02	93.8	0	2129191	41.63	85.02	2039	d__Bacteria;p__Proteobacteria;c__Gammaproteobacteria;o__QNFE01;f__QNFE01;g__;s__
A.kenti	Magnetic	Magnetic_MAG11	A.kenti_specific	89.12	3.76	77.84	70.32	50	2413730	36.61	91.07	2350	d__Bacteria;p__Proteobacteria;c__Alphaproteobacteria;o__JABSOH01;f__;g__;s__
A.kenti	Magnetic	Magnetic_MAG13	A.kenti_specific	98.67	1.67	93.66	90.32	0	6484270	52.98	89.5	5572	d__Bacteria;p__Desulfobacterota;c__Desulfobacteria;o__Desulfobacterales;f__Desulfobacteraceae;g__Desulfobacter;s__
A.kenti	Magnetic	Magnetic_MAG15	A.kenti_specific	96.54	0.81	94.11	92.49	0	2080491	39.04	85.39	1861	d__Bacteria;p__Proteobacteria;c__Gammaproteobacteria;o__QNFE01;f__QNFE01;g__;s__
A.kenti	Magnetic	Magnetic_MAG16	A.kenti_specific	81.14	0.58	79.4	78.24	0	1731780	32.54	86.84	1640	d__Bacteria;p__Bacteroidota;c__Bacteroidia;o__Flavobacteriales;f__Flavobacteriaceae;g__;s__
A.kenti	Magnetic	Magnetic_MAG17	A.kenti_specific	93.61	0.65	91.66	90.36	0	679886	19.66	84.14	588	d__Bacteria;p__Firmicutes;c__Bacilli;o__Mycoplasmatales;f__Mycoplasmataceae;g__;s__
A.kenti	Dunk	Dunk_MAG12	seawater_specific	93.75	0.27	92.94	92.4	100	1794501	62.91	91.95	2134	d__Bacteria;p__Cyanobacteria;c__Cyanobacteriia;o__PCC-6307;f__Cyanobiaceae;g__Synechococcus_E;s__Synechococcus_E sp002724845
A.kenti	Magnetic	Magnetic_MAG20	A.kenti_specific	97.04	0	97.04	97.04	0	2487800	60.12	89.3	2369	d__Bacteria;p__Actinobacteriota;c__Actinomycetia;o__Propionibacteriales;f__Propionibacteriaceae;g__Cutibacterium;s__Cutibacterium acnes
A.kenti	Magnetic	Magnetic_MAG21	A.kenti_specific	96.77	1.08	93.53	91.37	100	1664585	46.39	89.54	1550	d__Bacteria;p__Proteobacteria;c__Alphaproteobacteria;o__UBA8366;f__GCA-2696645;g__;s__
A.kenti	Magnetic	Magnetic_MAG22	A.kenti_specific	96.89	2.76	88.61	83.09	16.67	4890973	48.38	84.2	4469	d__Bacteria;p__Proteobacteria;c__Gammaproteobacteria;o__Pseudomonadales;f__Endozoicomonadaceae;g__Endozoicomonas;s__
A.kenti	Magnetic	Magnetic_MAG23	seawater_specific	92.12	0	92.12	92.12	0	1873630	62.23	91.02	2254	d__Bacteria;p__Cyanobacteria;c__Cyanobacteriia;o__PCC-6307;f__Cyanobiaceae;g__Synechococcus_E;s__Synechococcus_E sp002724845
A.kenti	Magnetic	Magnetic_MAG29	A.kenti_specific	100	0.56	98.32	97.2	0	4242127	65.3	90.56	3893	d__Bacteria;p__Proteobacteria;c__Gammaproteobacteria;o__Pseudomonadales;f__Alcanivoracaceae;g__Alcanivorax;s__
A.kenti	Russell	Russell_MAG33	A.kenti_specific	79.69	0.34	78.67	77.99	50	1591030	31.74	94.89	1538	d__Bacteria;p__Bacteroidota;c__Bacteroidia;o__Flavobacteriales;f__Flavobacteriaceae;g__DT-33;s__
A.kenti	Russell	Russell_MAG37	A.kenti_specific	92.36	0	92.36	92.36	0	882287	31.53	87.49	820	d__Bacteria;p__Firmicutes;c__Bacilli;o__Mycoplasmatales;f__Mycoplasmataceae;g__;s__
A.kenti	Russell	Russell_MAG38	A.kenti_specific	100	0.07	99.79	99.65	0	4362140	47.62	89.33	3932	d__Bacteria;p__Desulfobacterota;c__Desulfovibrionia;o__Desulfovibrionales;f__Desulfovibrionaceae;g__Maridesulfovibrio;s__
A.kenti	Russell	Russell_MAG40	A.kenti_specific	99.43	1.37	95.32	92.58	0	2997272	47.15	87.75	2896	d__Bacteria;p__Bacteroidota;c__Chlorobia;o__Chlorobiales;f__Chlorobiaceae;g__Chlorobium_A;s__Chlorobium_A marina
A.kenti	Russell	Russell_MAG41	A.kenti_specific	98.28	3.06	89.1	82.98	0	5897630	40.14	89.96	4792	d__Bacteria;p__Bacteroidota;c__Bacteroidia;o__Bacteroidales;f__Prolixibacteraceae;g__Draconibacterium;s__
A.kenti	Russell	Russell_MAG42	seawater_specific	83.42	2.14	77	72.72	70	1780458	62.47	91.7	2268	d__Bacteria;p__Cyanobacteria;c__Cyanobacteriia;o__PCC-6307;f__Cyanobiaceae;g__RCC307;s__RCC307 sp012270465
A.kenti	Russell	Russell_MAG43	A.kenti_specific	89.76	0.76	87.48	85.96	0	3945478	51.85	88.99	4051	d__Bacteria;p__Proteobacteria;c__Gammaproteobacteria;o__Enterobacterales;f__Shewanellaceae;g__Ferrimonas;s__Ferrimonas sp005116665
A.kenti	Russell	Russell_MAG44	A.kenti_specific	83.57	3.49	73.1	66.12	11.11	4302125	35.47	88.89	3604	d__Bacteria;p__Bacteroidota;c__Bacteroidia;o__Bacteroidales;f__UBA6680;g__UBA6680;s__
A.kenti	Russell	Russell_MAG45	A.kenti_specific	100	0.56	98.32	97.2	0	4258743	65.23	90.27	3896	d__Bacteria;p__Proteobacteria;c__Gammaproteobacteria;o__Pseudomonadales;f__Alcanivoracaceae;g__Alcanivorax;s__
A.kenti	Russell	Russell_MAG46	seawater_specific	95.43	0.14	95.01	94.73	100	1826385	62.84	91.6	2180	d__Bacteria;p__Cyanobacteria;c__Cyanobacteriia;o__PCC-6307;f__Cyanobiaceae;g__Synechococcus_E;s__Synechococcus_E sp002724845
A.kenti	Pandora	Pandora_MAG11	A.kenti_specific	97.95	0.84	95.43	93.75	0	5845937	47.87	86.66	4549	d__Bacteria;p__Proteobacteria;c__Gammaproteobacteria;o__Pseudomonadales;f__Endozoicomonadaceae;g__Endozoicomonas;s__
A.kenti	Pandora	Pandora_MAG12	A.kenti_specific	100	2.02	93.94	89.9	33.33	5375622	45.79	87.41	4984	d__Bacteria;p__Desulfobacterota;c__Desulfobulbia;o__Desulfobulbales;f__Desulfocapsaceae;g__Desulforhopalus;s__
A.kenti	Pandora	Pandora_MAG13	seawater_specific	89.72	4.03	77.63	69.57	16.67	2122999	60.96	91.12	2611	d__Bacteria;p__Cyanobacteria;c__Cyanobacteriia;o__PCC-6307;f__Cyanobiaceae;g__Synechococcus_C;s__
A.kenti	Pandora	Pandora_MAG14	A.kenti_specific	95.7	4.62	81.84	72.6	16.67	2240965	42.1	90.28	2343	d__Bacteria;p__Desulfobacterota_D;c__UBA1144;o__UBA2774;f__UBA2774;g__CR02bin9;s__
A.kenti	Pandora	Pandora_MAG15	seawater_specific	79.7	0.46	78.32	77.4	100	2831470	48.4	88.12	2517	d__Bacteria;p__Planctomycetota;c__Planctomycetes;o__Pirellulales;f__UBA1268;g__UBA1268;s__UBA1268 sp002694955
A.kenti	Pandora	Pandora_MAG16	A.kenti_specific	95.8	2.77	87.49	81.95	17.65	4244433	49.8	89.33	4435	d__Bacteria;p__Proteobacteria;c__Alphaproteobacteria;o__Rhizobiales;f__JACESI01;g__JACESI01;s__
A.kenti	Pandora	Pandora_MAG17	A.kenti_specific	89.22	6.39	70.05	57.27	15.15	3394382	58.29	86.99	3775	d__Bacteria;p__Proteobacteria;c__Alphaproteobacteria;o__Rhizobiales;f__Methyloligellaceae;g__Methyloceanibacter;s__
A.kenti	Pandora	Pandora_MAG18	A.kenti_specific	90.6	10.61	58.77	37.55	24.14	3964194	58.21	89.02	4269	d__Bacteria;p__Proteobacteria;c__Gammaproteobacteria;o__Chromatiales;f__Sedimenticolaceae;g__;s__
A.kenti	Pandora	Pandora_MAG19	A.kenti_specific	84.5	4.85	69.95	60.25	60	1323106	34.67	89.79	1836	d__Archaea;p__Thermoproteota;c__Nitrososphaeria;o__Nitrososphaerales;f__Nitrosopumilaceae;g__JACEMX01;s__
A.kenti	Pandora	Pandora_MAG20	A.kenti_specific	83.57	11.28	49.73	27.17	0	2577933	37.53	89.64	3250	d__Bacteria;p__Cyanobacteria;c__Vampirovibrionia;o__Gastranaerophilales;f__UBA9579;g__GWF2-37-15;s__
A.kenti	Pandora	Pandora_MAG21	A.kenti_specific	94.87	4.18	82.33	73.97	0	3472829	32.37	81.6	3311	d__Bacteria;p__Cyanobacteria;c__Vampirovibrionia;o__Gastranaerophilales;f__UBA9579;g__;s__
A.kenti	Pandora	Pandora_MAG22	A.kenti_specific	98.56	1.25	94.81	92.31	0	4473241	49.54	86.88	3828	d__Bacteria;p__Proteobacteria;c__Gammaproteobacteria;o__Pseudomonadales;f__Endozoicomonadaceae;g__Endozoicomonas;s__
A.kenti	Pandora	Pandora_MAG23	A.kenti_specific	97.37	4.08	85.13	76.97	0	5194688	34.11	87.51	5037	d__Bacteria;p__Bacteroidota;c__Bacteroidia;o__Flavobacteriales;f__Flavobacteriaceae;g__Tenacibaculum;s__
A.kenti	Pandora	Pandora_MAG24	A.kenti_specific	84.2	7.35	62.15	47.45	19.51	3957173	43.85	81.68	3667	d__Bacteria;p__Proteobacteria;c__Gammaproteobacteria;o__Enterobacterales;f__Alteromonadaceae;g__Thalassotalea;s__
A.kenti	Pandora	Pandora_MAG29	A.kenti_specific	80.02	3.13	70.63	64.37	28.57	2063072	39.35	91.19	2066	d__Bacteria;p__Proteobacteria;c__Gammaproteobacteria;o__UBA4486;f__UBA4486;g__;s__
A.kenti	Pandora	Pandora_MAG31	A.kenti_specific	97.6	2.01	91.57	87.55	0	4708611	61.5	89.7	4568	d__Bacteria;p__Proteobacteria;c__Alphaproteobacteria;o__Rhizobiales;f__Rhizobiaceae;g__Nitratireductor;s__Nitratireductor aquibiodomus
A.kenti	Pandora	Pandora_MAG32	A.kenti_specific	90.02	0.61	88.19	86.97	0	1676351	43.94	83.55	1564	d__Bacteria;p__Proteobacteria;c__Gammaproteobacteria;o__UBA9339;f__;g__;s__
A.kenti	Pandora	Pandora_MAG34	A.kenti_specific	86.96	2.07	80.75	76.61	66.67	2926945	60.12	91.8	3042	d__Bacteria;p__Proteobacteria;c__Gammaproteobacteria;o__Pseudomonadales;f__Halieaceae;g__Luminiphilus;s__Luminiphilus sp012270045
A.kenti	Pandora	Pandora_MAG37	A.kenti_specific	97.96	0	97.96	97.96	0	3547590	52.97	92.51	3149	d__Bacteria;p__Verrucomicrobiota;c__Verrucomicrobiae;o__Verrucomicrobiales;f__Akkermansiaceae;g__;s__
A.kenti	Pelorus	Pelorus_MAG2	A.kenti_specific	90.14	0.06	89.96	89.84	100	1607091	46.51	89.34	1518	d__Bacteria;p__Proteobacteria;c__Alphaproteobacteria;o__UBA8366;f__GCA-2696645;g__;s__
A.kenti	Pelorus	Pelorus_MAG3	seawater_specific	77.08	1.49	72.61	69.63	66.67	1434504	62.89	92.28	1871	d__Bacteria;p__Cyanobacteria;c__Cyanobacteriia;o__PCC-6307;f__Cyanobiaceae;g__Synechococcus_E;s__Synechococcus_E sp002724845
A.kenti	Pelorus	Pelorus_MAG4	A.kenti_specific	92.77	0	92.77	92.77	0	1788423	39.02	94.43	1619	d__Bacteria;p__Proteobacteria;c__Alphaproteobacteria;o__JABSOH01;f__;g__;s__
A.kenti	Pelorus	Pelorus_MAG5	A.kenti_specific	92.26	4.13	79.87	71.61	0	3253147	65.03	88.12	3077	d__Bacteria;p__Proteobacteria;c__Alphaproteobacteria;o__Rhizobiales;f__Methyloligellaceae;g__;s__
A.kenti	Pelorus	Pelorus_MAG7	A.kenti_specific	99.81	0.56	98.13	97.01	0	4243713	65.28	90.53	3899	d__Bacteria;p__Proteobacteria;c__Gammaproteobacteria;o__Pseudomonadales;f__Alcanivoracaceae;g__Alcanivorax;s__
A.kenti	Pelorus	Pelorus_MAG9	A.kenti_specific	86.59	4.42	73.33	64.49	57.14	2527994	48.72	89.82	2378	d__Bacteria;p__Verrucomicrobiota;c__Verrucomicrobiae;o__Verrucomicrobiales;f__Akkermansiaceae;g__Rubritalea;s__
A.kenti	Pelorus	Pelorus_MAG10	A.kenti_specific	99.32	1.46	94.94	92.02	60	2967874	42.74	91.51	2756	d__Bacteria;p__Verrucomicrobiota;c__Verrucomicrobiae;o__Verrucomicrobiales;f__Akkermansiaceae;g__;s__
A.kenti	Pelorus	Pelorus_MAG14	seawater_specific	99.78	0	99.78	99.78	0	3296137	58.25	82.61	2882	d__Bacteria;p__Proteobacteria;c__Alphaproteobacteria;o__Puniceispirillales;f__Puniceispirillaceae;g__UBA8309;s__UBA8309 sp001627655
A.kenti	Pelorus	Pelorus_MAG15	seawater_specific	80.02	3.99	68.05	60.07	0	2318260	40.98	94.03	2361	d__Bacteria;p__Bacteroidota;c__Bacteroidia;o__Flavobacteriales;f__UBA10066;g__UBA10066;s__UBA10066 sp003448535
A.kenti	Pelorus	Pelorus_MAG18	A.kenti_specific	94.19	1.03	91.1	89.04	0	4134919	49.77	84.68	3569	d__Bacteria;p__Proteobacteria;c__Gammaproteobacteria;o__Pseudomonadales;f__Endozoicomonadaceae;g__Endozoicomonas;s__
A.kenti	Pelorus	Pelorus_MAG19	seawater_specific	86.91	0.41	85.68	84.86	66.67	1655416	62.9	92.47	2005	d__Bacteria;p__Cyanobacteria;c__Cyanobacteriia;o__PCC-6307;f__Cyanobiaceae;g__Synechococcus_E;s__Synechococcus_E sp002724845
A.kenti	Pelorus	Pelorus_MAG20	A.kenti_specific	90.15	2.32	83.19	78.55	66.67	3249058	50.16	85.5	3251	d__Bacteria;p__Proteobacteria;c__Alphaproteobacteria;o__Rhodobacterales;f__Rhodobacteraceae;g__CABZJG01;s__
A.kenti	Pelorus	Pelorus_MAG21	seawater_specific	78.86	1.47	74.45	71.51	87.5	1619811	62.58	91.79	2061	d__Bacteria;p__Cyanobacteria;c__Cyanobacteriia;o__PCC-6307;f__Cyanobiaceae;g__RCC307;s__RCC307 sp012270465
A.kenti	Pelorus	Pelorus_MAG22	A.kenti_specific	86.43	3.84	74.91	67.23	0	6949618	49.96	86.36	5851	d__Bacteria;p__Bacteroidota;c__Kapabacteria;o__Kapabacteriales;f__;g__;s__
A.kenti	Pelorus	Pelorus_MAG24	A.kenti_specific	93.64	0.47	92.23	91.29	0	3314696	60.02	90.89	3144	d__Bacteria;p__Proteobacteria;c__Gammaproteobacteria;o__Pseudomonadales;f__Halieaceae;g__Luminiphilus;s__Luminiphilus sp012270045
Seawater	Dunk	seawater_Dunk_MAG1	seawater_specific	97.41	1.67	92.4	89.06	42.86	3196223	49.77	90.03	3194	d__Bacteria;p__Proteobacteria;c__Alphaproteobacteria;o__Rhodobacterales;f__Rhodobacteraceae;g__LFER01;s__LFER01 sp001510135
Seawater	Dunk	seawater_Dunk_MAG10	seawater_specific	79.18	4.7	65.08	55.68	33.33	2387062	66.16	93.48	2711	d__Bacteria;p__Actinobacteriota;c__Acidimicrobiia;o__Acidimicrobiales;f__UBA11606;g__UBA11606;s__UBA11606 sp002694825
Seawater	Dunk	seawater_Dunk_MAG12	seawater_specific	84.18	2.15	77.73	73.43	25	1771302	46.19	94.43	1908	d__Bacteria;p__Bacteroidota;c__Bacteroidia;o__Flavobacteriales;f__Schleiferiaceae;g__UBA10364;s__UBA10364 sp011525035
Seawater	Dunk	seawater_Dunk_MAG14	seawater_specific	96.7	1.08	93.46	91.3	0	2874696	41.11	94.01	2686	d__Bacteria;p__Bacteroidota;c__Bacteroidia;o__Flavobacteriales;f__UBA10066;g__UBA10066;s__UBA10066 sp003448535
Seawater	Dunk	seawater_Dunk_MAG15	seawater_specific	79.6	4.06	67.42	59.3	33.33	1593610	44.95	91.28	1464	d__Archaea;p__Thermoplasmatota;c__Poseidoniia_A;o__Poseidoniales;f__Thalassarchaeaceae;g__MGIIb-O1;s__MGIIb-O1 sp002685415
Seawater	Dunk	seawater_Dunk_MAG18	seawater_specific	89.66	7.82	66.2	50.56	29.41	2280570	38.19	94.66	2362	d__Bacteria;p__Bacteroidota;c__Bacteroidia;o__Flavobacteriales;f__Crocinitomicaceae;g__;s__
Seawater	Dunk	seawater_Dunk_MAG2	seawater_specific	85.68	3.52	75.12	68.08	33.33	2652508	54.77	90.33	2680	d__Bacteria;p__Proteobacteria;c__Gammaproteobacteria;o__Pseudomonadales;f__Pseudohongiellaceae;g__UBA9145;s__UBA9145 sp008081045
Seawater	Dunk	seawater_Dunk_MAG25	seawater_specific	76.37	0.6	74.57	73.37	14.29	663959	32.04	95.66	767	d__Bacteria;p__Marinisomatota;c__Marinisomatia;o__Marinisomatales;f__Marinisomataceae;g__Marinisoma;s__Marinisoma sp902599655
Seawater	Dunk	seawater_Dunk_MAG27	seawater_specific	88.61	5.49	72.14	61.16	16.67	1590901	36.63	94.38	1515	d__Bacteria;p__Marinisomatota;c__Marinisomatia;o__Marinisomatales;f__TCS55;g__TMED108;s__TMED108 sp002724475
Seawater	Dunk	seawater_Dunk_MAG29	seawater_specific	80.5	5.09	65.23	55.05	25.71	2037197	56.78	92.2	2142	d__Bacteria;p__Proteobacteria;c__Gammaproteobacteria;o__Pseudomonadales;f__Halieaceae;g__Luminiphilus;s__
Seawater	Dunk	seawater_Dunk_MAG3	seawater_specific	88.03	2.14	81.61	77.33	0	2008843	56.97	93.98	2216	d__Bacteria;p__Actinobacteriota;c__Acidimicrobiia;o__Acidimicrobiales;f__Ilumatobacteraceae;g__Casp-actino5;s__Casp-actino5 sp012269985
Seawater	Dunk	seawater_Dunk_MAG31	seawater_specific	76.25	7.76	52.97	37.45	0	2313062	42.31	91.68	2600	d__Bacteria;p__Proteobacteria;c__Alphaproteobacteria;o__Thalassobaculales;f__Nisaeaceae;g__GCA-002701455;s__GCA-002701455 sp002690995
Seawater	Dunk	seawater_Dunk_MAG4	seawater_specific	99.13	0.44	97.81	96.93	0	2478912	62.73	92.35	2421	d__Bacteria;p__Proteobacteria;c__Alphaproteobacteria;o__Puniceispirillales;f__Puniceispirillaceae;g__UBA8309;s__UBA8309 sp001627655
Seawater	Dunk	seawater_Dunk_MAG5	seawater_specific	84.9	3.85	73.35	65.65	0	2073983	44.96	93.6	2296	d__Bacteria;p__Actinobacteriota;c__Acidimicrobiia;o__Acidimicrobiales;f__UBA8592;g__MedAcidi-G2A;s__MedAcidi-G2A sp002380145
Seawater	Dunk	seawater_Dunk_MAG6	seawater_specific	75.7	2.31	68.77	64.15	20	1738987	62.52	92.27	2274	d__Bacteria;p__Cyanobacteria;c__Cyanobacteriia;o__PCC-6307;f__Cyanobiaceae;g__RCC307;s__RCC307 sp012270465
Seawater	Dunk	seawater_Dunk_MAG7	seawater_specific	94.48	7.84	70.96	55.28	40	1859927	65.58	92.68	2279	d__Bacteria;p__Cyanobacteria;c__Cyanobacteriia;o__PCC-6307;f__Cyanobiaceae;g__Vulcanococcus;s__Vulcanococcus sp014217875
Seawater	Dunk	seawater_Dunk_MAG9	seawater_specific	84.32	2.34	77.3	72.62	83.33	1766705	63.15	93.33	2028	d__Bacteria;p__Actinobacteriota;c__Actinomycetia;o__Nanopelagicales;f__S36-B12;g__S36-B12;s__S36-B12 sp010029945
Seawater	Fitzroy	seawater_Fitzroy_MAG1	seawater_specific	98.69	0	98.69	98.69	0	2335095	63.02	92.28	2292	d__Bacteria;p__Proteobacteria;c__Alphaproteobacteria;o__Puniceispirillales;f__Puniceispirillaceae;g__UBA8309;s__UBA8309 sp001627655
Seawater	Fitzroy	seawater_Fitzroy_MAG10	seawater_specific	84.31	1.54	79.69	76.61	50	1824310	62.55	92.61	2346	d__Bacteria;p__Cyanobacteria;c__Cyanobacteriia;o__PCC-6307;f__Cyanobiaceae;g__RCC307;s__RCC307 sp012270465
Seawater	Fitzroy	seawater_Fitzroy_MAG15	seawater_specific	77.27	1.68	72.23	68.87	33.33	2527750	47.31	91.4	2964	d__Bacteria;p__SAR324;c__SAR324;o__SAR324;f__NAC60-12;g__JCVI-SCAAA005;s__JCVI-SCAAA005 sp011522845
Seawater	Fitzroy	seawater_Fitzroy_MAG2	seawater_specific	95.93	1.21	92.3	89.88	14.29	3091869	49.79	90.33	3126	d__Bacteria;p__Proteobacteria;c__Alphaproteobacteria;o__Rhodobacterales;f__Rhodobacteraceae;g__LFER01;s__LFER01 sp001510135
Seawater	Fitzroy	seawater_Fitzroy_MAG24	seawater_specific	79.73	4.43	66.44	57.58	9.09	1761585	36.22	95.38	1745	d__Bacteria;p__Bacteroidota;c__Bacteroidia;o__Flavobacteriales;f__Crocinitomicaceae;g__UBA952;s__UBA952 sp011522905
Seawater	Fitzroy	seawater_Fitzroy_MAG28	seawater_specific	85.61	0	85.61	85.61	0	1530414	36.59	94.72	1455	d__Bacteria;p__Marinisomatota;c__Marinisomatia;o__Marinisomatales;f__TCS55;g__TMED108;s__TMED108 sp002724475
Seawater	Fitzroy	seawater_Fitzroy_MAG29	seawater_specific	82.97	3.68	71.93	64.57	16.67	1104506	29.76	95.64	1160	d__Bacteria;p__Bacteroidota;c__Bacteroidia;o__Flavobacteriales;f__Flavobacteriaceae;g__MED-G14;s__MED-G14 sp004321735
Seawater	Fitzroy	seawater_Fitzroy_MAG3	seawater_specific	86.32	2.99	77.35	71.37	50	2077293	56.89	93.39	2174	d__Bacteria;p__Actinobacteriota;c__Acidimicrobiia;o__Acidimicrobiales;f__Ilumatobacteraceae;g__Casp-actino5;s__Casp-actino5 sp012269985
Seawater	Fitzroy	seawater_Fitzroy_MAG31	seawater_specific	91.41	4.14	78.99	70.71	22.73	2945967	42.44	91.98	3072	d__Bacteria;p__Proteobacteria;c__Alphaproteobacteria;o__Thalassobaculales;f__Nisaeaceae;g__GCA-002701455;s__GCA-002701455 sp902578675
Seawater	Fitzroy	seawater_Fitzroy_MAG32	seawater_specific	77.42	4.1	65.12	56.92	7.14	2139777	33.87	95.31	2028	d__Bacteria;p__Bacteroidota;c__Bacteroidia;o__Flavobacteriales;f__UBA10066;g__GCA-2716065;s__
Seawater	Fitzroy	seawater_Fitzroy_MAG35	seawater_specific	94.31	10.6	62.51	41.31	7.69	2768477	38.27	94.78	2678	d__Bacteria;p__Bacteroidota;c__Bacteroidia;o__Flavobacteriales;f__Crocinitomicaceae;g__;s__
Seawater	Fitzroy	seawater_Fitzroy_MAG4	seawater_specific	89.36	5.56	72.68	61.56	0	2077173	45	93.1	2230	d__Bacteria;p__Actinobacteriota;c__Acidimicrobiia;o__Acidimicrobiales;f__UBA8592;g__MedAcidi-G2A;s__MedAcidi-G2A sp002380145
Seawater	Fitzroy	seawater_Fitzroy_MAG5	seawater_specific	91.45	4.37	78.34	69.6	42.86	2537394	66.08	93.72	2824	d__Bacteria;p__Actinobacteriota;c__Acidimicrobiia;o__Acidimicrobiales;f__UBA11606;g__UBA11606;s__UBA11606 sp002694825
Seawater	Fitzroy	seawater_Fitzroy_MAG6	seawater_specific	92.37	2.36	85.29	80.57	66.67	1878586	65.56	92.78	2291	d__Bacteria;p__Cyanobacteria;c__Cyanobacteriia;o__PCC-6307;f__Cyanobiaceae;g__Vulcanococcus;s__Vulcanococcus sp014217875
Seawater	Fitzroy	seawater_Fitzroy_MAG7	seawater_specific	88.92	4.1	76.62	68.42	90.62	2718647	54.72	90.2	2592	d__Bacteria;p__Proteobacteria;c__Gammaproteobacteria;o__Pseudomonadales;f__Pseudohongiellaceae;g__UBA9145;s__UBA9145 sp008081045
Seawater	Fitzroy	seawater_Fitzroy_MAG9	seawater_specific	98.66	0.54	97.04	95.96	0	2956075	41.11	92.82	2578	d__Bacteria;p__Bacteroidota;c__Bacteroidia;o__Flavobacteriales;f__UBA10066;g__UBA10066;s__UBA10066 sp003448535
Seawater	Magnetic	seawater_Magnetic_MAG1	seawater_specific	96.39	2.12	90.03	85.79	11.11	3195759	49.66	89.85	3189	d__Bacteria;p__Proteobacteria;c__Alphaproteobacteria;o__Rhodobacterales;f__Rhodobacteraceae;g__LFER01;s__LFER01 sp001510135
Seawater	Magnetic	seawater_Magnetic_MAG10	seawater_specific	85.31	3.4	75.11	68.31	28.57	2524224	54.87	90.41	2501	d__Bacteria;p__Proteobacteria;c__Gammaproteobacteria;o__Pseudomonadales;f__Pseudohongiellaceae;g__UBA9145;s__UBA9145 sp008081045
Seawater	Magnetic	seawater_Magnetic_MAG11	seawater_specific	92.62	2.58	84.88	79.72	33.33	1932629	65.56	92.73	2297	d__Bacteria;p__Cyanobacteria;c__Cyanobacteriia;o__PCC-6307;f__Cyanobiaceae;g__Vulcanococcus;s__Vulcanococcus sp014217875
Seawater	Magnetic	seawater_Magnetic_MAG12	seawater_specific	89.74	1.69	84.67	81.29	42.86	1692793	51.47	91.42	1785	d__Bacteria;p__Proteobacteria;c__Alphaproteobacteria;o__Puniceispirillales;f__Puniceispirillaceae;g__UBA3439;s__UBA3439 sp012269685
Seawater	Magnetic	seawater_Magnetic_MAG13	seawater_specific	75.59	4.7	61.49	52.09	50	2465314	66.27	92.61	2815	d__Bacteria;p__Actinobacteriota;c__Acidimicrobiia;o__Acidimicrobiales;f__UBA11606;g__UBA11606;s__UBA11606 sp002694825
Seawater	Magnetic	seawater_Magnetic_MAG14	seawater_specific	79.98	2.19	73.41	69.03	80	1737856	62.51	91.98	2278	d__Bacteria;p__Cyanobacteria;c__Cyanobacteriia;o__PCC-6307;f__Cyanobiaceae;g__RCC307;s__RCC307 sp012270465
Seawater	Magnetic	seawater_Magnetic_MAG15	seawater_specific	83.24	1.24	79.52	77.04	33.33	2369939	41.34	92.83	2288	d__Bacteria;p__Bacteroidota;c__Bacteroidia;o__Chitinophagales;f__Saprospiraceae;g__RFSX01;s__RFSX01 sp009923745
Seawater	Magnetic	seawater_Magnetic_MAG16	seawater_specific	80	2.4	72.8	68	33.33	1507993	52.7	94.43	1422	d__Archaea;p__Thermoplasmatota;c__Poseidoniia_A;o__Poseidoniales;f__Thalassarchaeaceae;g__MGIIb-N1;s__MGIIb-N1 sp011523055
Seawater	Magnetic	seawater_Magnetic_MAG18	seawater_specific	82.23	0.67	80.22	78.88	50	1834168	45.25	92.81	1585	d__Archaea;p__Thermoplasmatota;c__Poseidoniia_A;o__Poseidoniales;f__Poseidoniaceae;g__MGIIa-K1;s__
Seawater	Magnetic	seawater_Magnetic_MAG2	seawater_specific	97.6	0	97.6	97.6	0	2315872	63.03	91.87	2252	d__Bacteria;p__Proteobacteria;c__Alphaproteobacteria;o__Puniceispirillales;f__Puniceispirillaceae;g__UBA8309;s__UBA8309 sp001627655
Seawater	Magnetic	seawater_Magnetic_MAG20	seawater_specific	79.6	0.8	77.2	75.6	100	1860409	56.19	94.78	1574	d__Archaea;p__Thermoplasmatota;c__Poseidoniia_A;o__Poseidoniales;f__Poseidoniaceae;g__Poseidonia;s__
Seawater	Magnetic	seawater_Magnetic_MAG21	seawater_specific	97.23	2.66	89.25	83.93	20	1969238	49.39	92.8	1988	d__Bacteria;p__Proteobacteria;c__Alphaproteobacteria;o__Puniceispirillales;f__Puniceispirillaceae;g__UBA685;s__UBA685 sp011524995
Seawater	Magnetic	seawater_Magnetic_MAG23	seawater_specific	77.72	1.26	73.94	71.42	66.67	1618481	48.69	92.56	1840	d__Bacteria;p__Proteobacteria;c__Gammaproteobacteria;o__Pseudomonadales;f__Nitrincolaceae;g__Marinobacterium;s__
Seawater	Magnetic	seawater_Magnetic_MAG3	seawater_specific	90.06	0.89	87.39	85.61	100	3713647	47.39	90.43	3653	d__Bacteria;p__SAR324;c__SAR324;o__SAR324;f__NAC60-12;g__UBA1014;s__UBA1014 sp001469005
Seawater	Magnetic	seawater_Magnetic_MAG30	seawater_specific	80.32	0.87	77.71	75.97	50	1615879	43.74	93.57	1719	d__Bacteria;p__Bacteroidota;c__Bacteroidia;o__Flavobacteriales;f__Flavobacteriaceae;g__UBA7428;s__UBA7428 sp011526275
Seawater	Magnetic	seawater_Magnetic_MAG31	seawater_specific	78.4	2.32	71.44	66.8	21.43	2308550	38.48	94.68	2385	d__Bacteria;p__Bacteroidota;c__Bacteroidia;o__Flavobacteriales;f__Crocinitomicaceae;g__;s__
Seawater	Magnetic	seawater_Magnetic_MAG32	seawater_specific	96.59	1.08	93.35	91.19	0	2908758	41.06	93.55	2624	d__Bacteria;p__Bacteroidota;c__Bacteroidia;o__Flavobacteriales;f__UBA10066;g__UBA10066;s__UBA10066 sp003448535
Seawater	Magnetic	seawater_Magnetic_MAG33	seawater_specific	95.5	0	95.5	95.5	0	1644714	36.68	94.44	1559	d__Bacteria;p__Marinisomatota;c__Marinisomatia;o__Marinisomatales;f__TCS55;g__TMED108;s__TMED108 sp002702225
Seawater	Magnetic	seawater_Magnetic_MAG37	seawater_specific	82.45	3.74	71.23	63.75	0	1099591	29.7	94.44	1116	d__Bacteria;p__Bacteroidota;c__Bacteroidia;o__Flavobacteriales;f__Flavobacteriaceae;g__MED-G14;s__MED-G14 sp004321735
Seawater	Magnetic	seawater_Magnetic_MAG4	seawater_specific	78.86	1.45	74.51	71.61	57.14	1336481	41.48	93.95	1324	d__Bacteria;p__Bacteroidota;c__Bacteroidia;o__Flavobacteriales;f__Flavobacteriaceae;g__UBA724;s__UBA724 sp002723075
Seawater	Magnetic	seawater_Magnetic_MAG40	seawater_specific	83.97	8.79	57.6	40.02	53.85	2043481	56.99	94.97	1820	d__Archaea;p__Thermoplasmatota;c__Poseidoniia_A;o__Poseidoniales;f__Poseidoniaceae;g__Poseidonia;s__
Seawater	Magnetic	seawater_Magnetic_MAG42	seawater_specific	83.73	7.58	60.99	45.83	0	2115008	42.16	94.96	1933	d__Archaea;p__Thermoplasmatota;c__Poseidoniia_A;o__Poseidoniales;f__Poseidoniaceae;g__MGIIa-K1;s__
Seawater	Magnetic	seawater_Magnetic_MAG5	seawater_specific	84.13	0.06	83.95	83.83	0	1932283	59.61	94.59	1627	d__Archaea;p__Thermoplasmatota;c__Poseidoniia_A;o__Poseidoniales;f__Poseidoniaceae;g__Poseidonia;s__Poseidonia sp011524855
Seawater	Magnetic	seawater_Magnetic_MAG6	seawater_specific	91.94	1.66	86.96	83.64	40	1806588	54.72	94.5	2011	d__Bacteria;p__Proteobacteria;c__Gammaproteobacteria;o__Pseudomonadales;f__Litoricolaceae;g__Litoricola;s__
Seawater	Magnetic	seawater_Magnetic_MAG7	seawater_specific	77.78	0.85	75.23	73.53	50	1587315	57.31	94.24	1825	d__Bacteria;p__Actinobacteriota;c__Acidimicrobiia;o__Acidimicrobiales;f__Ilumatobacteraceae;g__Casp-actino5;s__Casp-actino5 sp012269985
Seawater	Magnetic	seawater_Magnetic_MAG8	seawater_specific	87.41	1.32	83.45	80.81	42.86	1998727	46.05	90.69	2018	d__Bacteria;p__Bacteroidota;c__Bacteroidia;o__Flavobacteriales;f__Schleiferiaceae;g__UBA10364;s__UBA10364 sp011525035
Seawater	Pandora	seawater_Pandora_MAG1	seawater_specific	98.36	1.09	95.09	92.91	0	2277176	62.99	92.31	2210	d__Bacteria;p__Proteobacteria;c__Alphaproteobacteria;o__Puniceispirillales;f__Puniceispirillaceae;g__UBA8309;s__UBA8309 sp001627655
Seawater	Pandora	seawater_Pandora_MAG10	seawater_specific	78.82	3.85	67.27	59.57	0	1728686	45	93.62	1968	d__Bacteria;p__Actinobacteriota;c__Acidimicrobiia;o__Acidimicrobiales;f__UBA8592;g__MedAcidi-G2A;s__
Seawater	Pandora	seawater_Pandora_MAG11	seawater_specific	98.39	0	98.39	98.39	0	3002012	41.13	92.76	2604	d__Bacteria;p__Bacteroidota;c__Bacteroidia;o__Flavobacteriales;f__UBA10066;g__UBA10066;s__UBA10066 sp003448535
Seawater	Pandora	seawater_Pandora_MAG14	seawater_specific	79.17	2	73.17	69.17	33.33	1623406	45.31	90.89	1500	d__Archaea;p__Thermoplasmatota;c__Poseidoniia_A;o__Poseidoniales;f__Thalassarchaeaceae;g__MGIIb-O1;s__MGIIb-O1 sp002685415
Seawater	Pandora	seawater_Pandora_MAG17	seawater_specific	91.38	6.43	72.09	59.23	4.55	2042731	36.05	94.84	1965	d__Bacteria;p__Bacteroidota;c__Bacteroidia;o__Flavobacteriales;f__Crocinitomicaceae;g__UBA952;s__UBA952 sp011522905
Seawater	Pandora	seawater_Pandora_MAG2	seawater_specific	88.32	1.73	83.13	79.67	0	3447144	47.37	90.57	3595	d__Bacteria;p__SAR324;c__SAR324;o__SAR324;f__NAC60-12;g__UBA1014;s__UBA1014 sp001469005
Seawater	Pandora	seawater_Pandora_MAG22	seawater_specific	80.94	2.39	73.77	68.99	14.29	2646409	42.41	91.68	2795	d__Bacteria;p__Proteobacteria;c__Alphaproteobacteria;o__Thalassobaculales;f__Nisaeaceae;g__GCA-002701455;s__GCA-002701455 sp902578675
Seawater	Pandora	seawater_Pandora_MAG3	seawater_specific	88.49	0.77	86.18	84.64	33.33	2641435	41.28	92.6	2532	d__Bacteria;p__Bacteroidota;c__Bacteroidia;o__Chitinophagales;f__Saprospiraceae;g__RFSX01;s__RFSX01 sp009923745
Seawater	Pandora	seawater_Pandora_MAG4	seawater_specific	95.81	1.76	90.53	87.01	50	3212669	49.8	90.52	3343	d__Bacteria;p__Proteobacteria;c__Alphaproteobacteria;o__Rhodobacterales;f__Rhodobacteraceae;g__LFER01;s__LFER01 sp001510135
Seawater	Pandora	seawater_Pandora_MAG5	seawater_specific	80.05	3.68	69.01	61.65	25	2420820	54.77	90.2	2505	d__Bacteria;p__Proteobacteria;c__Gammaproteobacteria;o__Pseudomonadales;f__Pseudohongiellaceae;g__UBA9145;s__UBA9145 sp008081045
Seawater	Pandora	seawater_Pandora_MAG6	seawater_specific	86.18	1.71	81.05	77.63	0	2018621	56.94	93.66	2220	d__Bacteria;p__Actinobacteriota;c__Acidimicrobiia;o__Acidimicrobiales;f__Ilumatobacteraceae;g__Casp-actino5;s__Casp-actino5 sp012269985
Seawater	Pandora	seawater_Pandora_MAG7	seawater_specific	86.99	2.13	80.6	76.34	70	1813412	65.64	92.54	2239	d__Bacteria;p__Cyanobacteria;c__Cyanobacteriia;o__PCC-6307;f__Cyanobiaceae;g__Vulcanococcus;s__Vulcanococcus sp014217875
Seawater	Pandora	seawater_Pandora_MAG8	seawater_specific	78.36	2.37	71.25	66.51	0	2746122	48.39	89.68	2550	d__Bacteria;p__Planctomycetota;c__Planctomycetes;o__Pirellulales;f__UBA1268;g__UBA1268;s__UBA1268 sp002694955
Seawater	Pandora	seawater_Pandora_MAG9	seawater_specific	78.48	0.27	77.67	77.13	100	1808774	63.08	92.55	2053	d__Bacteria;p__Actinobacteriota;c__Actinomycetia;o__Nanopelagicales;f__S36-B12;g__S36-B12;s__S36-B12 sp010029945
Seawater	Pelorus	seawater_Pelorus_MAG1	seawater_specific	98.47	0	98.47	98.47	0	2315161	63.02	91.31	2231	d__Bacteria;p__Proteobacteria;c__Alphaproteobacteria;o__Puniceispirillales;f__Puniceispirillaceae;g__UBA8309;s__UBA8309 sp001627655
Seawater	Pelorus	seawater_Pelorus_MAG16	seawater_specific	85.3	5.14	69.88	59.6	0	2268797	35.92	93.45	2201	d__Bacteria;p__Bacteroidota;c__Bacteroidia;o__Flavobacteriales;f__Crocinitomicaceae;g__UBA952;s__UBA952 sp011522905
Seawater	Pelorus	seawater_Pelorus_MAG17	seawater_specific	83.76	6.99	62.79	48.81	25	2076074	45.06	92.62	2265	d__Bacteria;p__Actinobacteriota;c__Acidimicrobiia;o__Acidimicrobiales;f__UBA8592;g__MedAcidi-G2A;s__MedAcidi-G2A sp002380145
Seawater	Pelorus	seawater_Pelorus_MAG2	seawater_specific	97.58	1.08	94.34	92.18	0	2965435	41.14	91.84	2550	d__Bacteria;p__Bacteroidota;c__Bacteroidia;o__Flavobacteriales;f__UBA10066;g__UBA10066;s__UBA10066 sp003448535
Seawater	Pelorus	seawater_Pelorus_MAG21	seawater_specific	80.17	8.31	55.24	38.62	3.45	893832	35.93	94.06	983	d__Bacteria;p__Proteobacteria;c__Gammaproteobacteria;o__SAR86;f__TMED112;g__TMED112;s__TMED112 sp902535365
Seawater	Pelorus	seawater_Pelorus_MAG22	seawater_specific	96.7	0	96.7	96.7	0	1703259	36.74	94.64	1617	d__Bacteria;p__Marinisomatota;c__Marinisomatia;o__Marinisomatales;f__TCS55;g__TMED108;s__TMED108 sp002702225
Seawater	Pelorus	seawater_Pelorus_MAG25	seawater_specific	76.62	6.57	56.91	43.77	33.33	1668005	62.24	92.75	2062	d__Bacteria;p__Cyanobacteria;c__Cyanobacteriia;o__PCC-6307;f__Cyanobiaceae;g__Synechococcus_E;s__
Seawater	Pelorus	seawater_Pelorus_MAG26	seawater_specific	79.4	2.8	71	65.4	0	2753598	42.32	91.4	2932	d__Bacteria;p__Proteobacteria;c__Alphaproteobacteria;o__Thalassobaculales;f__Nisaeaceae;g__GCA-002701455;s__GCA-002701455 sp002690995
Seawater	Pelorus	seawater_Pelorus_MAG29	seawater_specific	75.7	3.42	65.44	58.6	17.86	2188469	40.63	90.94	2236	d__Bacteria;p__Proteobacteria;c__Alphaproteobacteria;o__Rhodobacterales;f__Rhodobacteraceae;g__MED-G52;s__MED-G52 sp002457055
Seawater	Pelorus	seawater_Pelorus_MAG3	seawater_specific	95.3	4.7	81.2	71.8	37.5	2755174	65.98	93.36	2799	d__Bacteria;p__Actinobacteriota;c__Acidimicrobiia;o__Acidimicrobiales;f__UBA11606;g__UBA11606;s__UBA11606 sp002694825
Seawater	Pelorus	seawater_Pelorus_MAG4	seawater_specific	93.16	1.28	89.32	86.76	0	2165563	56.75	94.34	2163	d__Bacteria;p__Actinobacteriota;c__Acidimicrobiia;o__Acidimicrobiales;f__Ilumatobacteraceae;g__Casp-actino5;s__Casp-actino5 sp012269985
Seawater	Pelorus	seawater_Pelorus_MAG5	seawater_specific	89.24	3.45	78.89	71.99	66.67	3222348	48.31	85.8	2746	d__Bacteria;p__Planctomycetota;c__Planctomycetes;o__Pirellulales;f__UBA1268;g__UBA1268;s__UBA1268 sp002694955
Seawater	Pelorus	seawater_Pelorus_MAG6	seawater_specific	83.38	1.99	77.41	73.43	25	1687853	65.6	92.96	2172	d__Bacteria;p__Cyanobacteria;c__Cyanobacteriia;o__PCC-6307;f__Cyanobiaceae;g__Vulcanococcus;s__Vulcanococcus sp014217875
Seawater	Pelorus	seawater_Pelorus_MAG7	seawater_specific	75.6	2.4	68.4	63.6	33.33	1344845	51.65	92.68	1205	d__Archaea;p__Thermoplasmatota;c__Poseidoniia_A;o__Poseidoniales;f__Thalassarchaeaceae;g__MGIIb-O3;s__MGIIb-O3 sp001628485
Seawater	Pelorus	seawater_Pelorus_MAG8	seawater_specific	81.18	6.05	63.03	50.93	33.33	2090785	62.88	92.43	2349	d__Bacteria;p__Actinobacteriota;c__Actinomycetia;o__Nanopelagicales;f__S36-B12;g__S36-B12;s__S36-B12 sp002694095
Seawater	Russell	seawater_Russell_MAG1	seawater_specific	98.47	0.44	97.15	96.27	100	2362917	62.92	92.41	2322	d__Bacteria;p__Proteobacteria;c__Alphaproteobacteria;o__Puniceispirillales;f__Puniceispirillaceae;g__UBA8309;s__UBA8309 sp001627655
Seawater	Russell	seawater_Russell_MAG10	seawater_specific	80.87	4.32	67.91	59.27	10	1737625	44.93	94.09	2013	d__Bacteria;p__Actinobacteriota;c__Acidimicrobiia;o__Acidimicrobiales;f__UBA8592;g__MedAcidi-G2A;s__
Seawater	Russell	seawater_Russell_MAG17	seawater_specific	90.11	7.16	68.63	54.31	29.41	2507134	38.27	94.49	2529	d__Bacteria;p__Bacteroidota;c__Bacteroidia;o__Flavobacteriales;f__Crocinitomicaceae;g__;s__
Seawater	Russell	seawater_Russell_MAG2	seawater_specific	96.66	1.29	92.79	90.21	12.5	3254142	49.47	89.91	3331	d__Bacteria;p__Proteobacteria;c__Alphaproteobacteria;o__Rhodobacterales;f__Rhodobacteraceae;g__LFER01;s__LFER01 sp001510135
Seawater	Russell	seawater_Russell_MAG20	seawater_specific	94.51	0	94.51	94.51	0	1694818	36.6	94.17	1618	d__Bacteria;p__Marinisomatota;c__Marinisomatia;o__Marinisomatales;f__TCS55;g__TMED108;s__TMED108 sp002724475
Seawater	Russell	seawater_Russell_MAG22	seawater_specific	85.66	4.4	72.46	63.66	0	1160670	29.67	94.68	1201	d__Bacteria;p__Bacteroidota;c__Bacteroidia;o__Flavobacteriales;f__Flavobacteriaceae;g__MED-G14;s__MED-G14 sp004321735
Seawater	Russell	seawater_Russell_MAG3	seawater_specific	83.27	2.9	74.57	68.77	23.08	2569819	54.72	90.15	2654	d__Bacteria;p__Proteobacteria;c__Gammaproteobacteria;o__Pseudomonadales;f__Pseudohongiellaceae;g__UBA9145;s__UBA9145 sp008081045
Seawater	Russell	seawater_Russell_MAG4	seawater_specific	80.34	2.4	73.14	68.34	60	1733430	57.12	94.25	1980	d__Bacteria;p__Actinobacteriota;c__Acidimicrobiia;o__Acidimicrobiales;f__Ilumatobacteraceae;g__Casp-actino5;s__Casp-actino5 sp012269985
Seawater	Russell	seawater_Russell_MAG6	seawater_specific	93.82	1.63	88.93	85.67	0	2872521	41.11	93.86	2684	d__Bacteria;p__Bacteroidota;c__Bacteroidia;o__Flavobacteriales;f__UBA10066;g__UBA10066;s__UBA10066 sp003448535
Seawater	Russell	seawater_Russell_MAG7	seawater_specific	79.94	2.58	72.2	67.04	27.27	1790584	62.44	92.57	2342	d__Bacteria;p__Cyanobacteria;c__Cyanobacteriia;o__PCC-6307;f__Cyanobiaceae;g__RCC307;s__RCC307 sp012270465
Seawater	Russell	seawater_Russell_MAG8	seawater_specific	90.1	3.67	79.09	71.75	42.86	1845743	65.58	92.96	2277	d__Bacteria;p__Cyanobacteria;c__Cyanobacteriia;o__PCC-6307;f__Cyanobiaceae;g__Vulcanococcus;s__Vulcanococcus sp014217875
