# Supplementary material for: The microbiome of the branching coral Acropora kenti
Source: Research Square preprint supplement (doi:10.21203/rs.3.rs-3228011/v1), 2023-08-08
Supplement: Supplementary file 2 [file 472c45e5733888c211c71fb2.xlsx]

## Sheet: ko_fisher
Annotation	Group_1	Group_2	Group_enriched_in	Group_1_true	Group_1_false	Group_2_true	Group_2_false	Score	P-value	Corrected_p-value	Difference	Description
K02069	Akenti_specific	Seawater_specific	Akenti_specific	14	68	7	112	3.29412	0.017293	0.0495786	7	ABC.X2.P; putative ABC transport system permease protein
K19423	Akenti_specific	Seawater_specific	Akenti_specific	14	68	7	112	3.29412	0.017293	0.0495786	7	epsE; glycosyltransferase EpsE [EC:2.4.-.-]
K15894	Akenti_specific	Seawater_specific	Akenti_specific	14	68	7	112	3.29412	0.017293	0.0495786	7	pseB; UDP-N-acetylglucosamine 4,6-dehydratase [EC:4.2.1.115]
K08984	Akenti_specific	Seawater_specific	Akenti_specific	14	68	7	112	3.29412	0.017293	0.0495786	7	yjdF; putative membrane protein
K03611	Akenti_specific	Seawater_specific	Akenti_specific	38	44	35	84	2.07273	0.0171007	0.04912	3	dsbB; disulfide bond formation protein DsbB
K04127	Akenti_specific	Seawater_specific	Seawater_specific	2	80	14	105	0.1875	0.0170135	0.0488927	-12	cefD; isopenicillin-N epimerase [EC:5.1.1.17]
K16046	Akenti_specific	Seawater_specific	Seawater_specific	2	80	14	105	0.1875	0.0170135	0.0488927	-12	CYP142; cholest-4-en-3-one 26-monooxygenase [EC:1.14.15.28]
K19746	Akenti_specific	Seawater_specific	Seawater_specific	2	80	14	105	0.1875	0.0170135	0.0488927	-12	dauA; D-arginine dehydrogenase [EC:1.4.99.6]
K16436	Akenti_specific	Seawater_specific	Seawater_specific	2	80	14	105	0.1875	0.0170135	0.0488927	-12	evaB, megDII, angB, staI; dTDP-3-amino-2,3,6-trideoxy-4-keto-D-glucose/dTDP-3-amino-3,4,6-trideoxy-alpha-D-glucose/dTDP-2,6-dideoxy-D-kanosamine transaminase [EC:2.6.1.- 2.6.1.106]
K02010	Akenti_specific	Seawater_specific	Seawater_specific	51	31	93	26	0.459938	0.0169486	0.0487984	-42	afuC, fbpC; iron(III) transport system ATP-binding protein [EC:3.6.3.30]
K13598	Akenti_specific	Seawater_specific	Akenti_specific	26	56	20	99	2.29821	0.016777	0.0483273	6	ntrY; two-component system, NtrC family, nitrogen regulation sensor histidine kinase NtrY [EC:2.7.13.3]
K01119	Akenti_specific	Seawater_specific	Akenti_specific	8	74	2	117	6.32432	0.0166613	0.0480167	6	cpdB; 2',3'-cyclic-nucleotide 2'-phosphodiesterase / 3'-nucleotidase [EC:3.1.4.16 3.1.3.6]
K18334	Akenti_specific	Seawater_specific	Akenti_specific	8	74	2	117	6.32432	0.0166613	0.0480167	6	fucD; L-fuconate dehydratase [EC:4.2.1.68]
K03535	Akenti_specific	Seawater_specific	Akenti_specific	8	74	2	117	6.32432	0.0166613	0.0480167	6	gudP; MFS transporter, ACS family, glucarate transporter
K00675	Akenti_specific	Seawater_specific	Akenti_specific	8	74	2	117	6.32432	0.0166613	0.0480167	6	nhoA; N-hydroxyarylamine O-acetyltransferase [EC:2.3.1.118]
K11444	Akenti_specific	Seawater_specific	Akenti_specific	8	74	2	117	6.32432	0.0166613	0.0480167	6	wspR; two-component system, chemotaxis family, response regulator WspR [EC:2.7.7.65]
K15635	Akenti_specific	Seawater_specific	Akenti_specific	9	73	3	116	4.76712	0.0163961	0.047432	6	apgM; 2,3-bisphosphoglycerate-independent phosphoglycerate mutase [EC:5.4.2.12]
K00456	Akenti_specific	Seawater_specific	Seawater_specific	1	81	12	107	0.110082	0.0164194	0.047432	-11	CDO1; cysteine dioxygenase [EC:1.13.11.20]
K12952	Akenti_specific	Seawater_specific	Seawater_specific	1	81	12	107	0.110082	0.0164194	0.047432	-11	ctpE; cation-transporting P-type ATPase E [EC:3.6.3.-]
K06350	Akenti_specific	Seawater_specific	Akenti_specific	19	63	12	107	2.68915	0.0163775	0.047432	7	kipA; antagonist of KipI
K06968	Akenti_specific	Seawater_specific	Akenti_specific	9	73	3	116	4.76712	0.0163961	0.047432	6	rlmM; 23S rRNA (cytidine2498-2'-O)-methyltransferase [EC:2.1.1.186]
K03166	Akenti_specific	Seawater_specific	Seawater_specific	1	81	12	107	0.110082	0.0164194	0.047432	-11	top6A; DNA topoisomerase VI subunit A [EC:5.99.1.3]
K03928	Akenti_specific	Seawater_specific	Seawater_specific	1	81	12	107	0.110082	0.0164194	0.047432	-11	yvaK; carboxylesterase [EC:3.1.1.1]
K13877	Akenti_specific	Seawater_specific	Akenti_specific	16	66	9	110	2.96296	0.0160296	0.0464607	7	aldH; 2,5-dioxopentanoate dehydrogenase [EC:1.2.1.26]
K01848	Akenti_specific	Seawater_specific	Seawater_specific	11	71	33	86	0.403756	0.0160095	0.0464607	-22	E5.4.99.2A, mcmA1; methylmalonyl-CoA mutase, N-terminal domain [EC:5.4.99.2]
K04028	Akenti_specific	Seawater_specific	Seawater_specific	11	71	33	86	0.403756	0.0160095	0.0464607	-22	eutN; ethanolamine utilization protein EutN
K00748	Akenti_specific	Seawater_specific	Akenti_specific	71	11	86	33	2.47674	0.0160095	0.0464607	-15	lpxB; lipid-A-disaccharide synthase [EC:2.4.1.182]
K14731	Akenti_specific	Seawater_specific	Akenti_specific	16	66	9	110	2.96296	0.0160296	0.0464607	7	mlhB, chnC; epsilon-lactone hydrolase [EC:3.1.1.83]
K07304	Akenti_specific	Seawater_specific	Seawater_specific	66	16	110	9	0.3375	0.0160296	0.0464607	-44	msrA; peptide-methionine (S)-S-oxide reductase [EC:1.8.4.11]
K07444	Akenti_specific	Seawater_specific	Seawater_specific	15	67	41	78	0.425919	0.0159581	0.046386	-26	ypsC; putative N6-adenine-specific DNA methylase [EC:2.1.1.-]
K11263	Akenti_specific	Seawater_specific	Seawater_specific	3	79	17	102	0.227848	0.0154929	0.0450553	-14	bccA, pccA; acetyl-CoA/propionyl-CoA carboxylase, biotin carboxylase, biotin carboxyl carrier protein [EC:6.4.1.2 6.4.1.3 6.3.4.14]
K16841	Akenti_specific	Seawater_specific	Seawater_specific	3	79	17	102	0.227848	0.0154929	0.0450553	-14	hpxA; allantoin racemase [EC:5.1.99.3]
K07685	Akenti_specific	Seawater_specific	Seawater_specific	3	79	17	102	0.227848	0.0154929	0.0450553	-14	narP; two-component system, NarL family, nitrate/nitrite response regulator NarP
K09019	Akenti_specific	Seawater_specific	Seawater_specific	3	79	17	102	0.227848	0.0154929	0.0450553	-14	rutE; 3-hydroxypropanoate dehydrogenase [EC:1.1.1.-]
K03695	Akenti_specific	Seawater_specific	Akenti_specific	71	11	85	34	2.58182	0.0153606	0.0447565	-14	clpB; ATP-dependent Clp protease ATP-binding subunit ClpB
K00453	Akenti_specific	Seawater_specific	Seawater_specific	11	71	34	85	0.387324	0.0153606	0.0447565	-23	TDO2, kynA; tryptophan 2,3-dioxygenase [EC:1.13.11.11]
K01082	Akenti_specific	Seawater_specific	Seawater_specific	46	36	87	32	0.469987	0.0152396	0.0444465	-41	cysQ, MET22, BPNT1; 3'(2'), 5'-bisphosphate nucleotidase [EC:3.1.3.7]
K16787	Akenti_specific	Seawater_specific	Seawater_specific	6	76	24	95	0.3125	0.0148731	0.0433984	-18	ecfA2; energy-coupling factor transport system ATP-binding protein [EC:3.6.3.-]
K03530	Akenti_specific	Seawater_specific	Akenti_specific	76	6	95	24	3.2	0.0148731	0.0433984	-19	hupB; DNA-binding protein HU-beta
K01924	Akenti_specific	Seawater_specific	Akenti_specific	76	6	95	24	3.2	0.0148731	0.0433984	-19	murC; UDP-N-acetylmuramate--alanine ligase [EC:6.3.2.8]
K01788	Akenti_specific	Seawater_specific	Seawater_specific	6	76	24	95	0.3125	0.0148731	0.0433984	-18	nanE; N-acylglucosamine-6-phosphate 2-epimerase [EC:5.1.3.9]
K00392	Akenti_specific	Seawater_specific	Seawater_specific	6	76	24	95	0.3125	0.0148731	0.0433984	-18	sir; sulfite reductase (ferredoxin) [EC:1.8.7.1]
K01070	Akenti_specific	Seawater_specific	Akenti_specific	30	52	24	95	2.28365	0.0147154	0.0430416	6	frmB, ESD, fghA; S-formylglutathione hydrolase [EC:3.1.2.12]
K07098	Akenti_specific	Seawater_specific	Akenti_specific	30	52	24	95	2.28365	0.0147154	0.0430416	6	K07098; uncharacterized protein
K01299	Akenti_specific	Seawater_specific	Seawater_specific	19	63	48	71	0.446098	0.0146078	0.0427678	-29	E3.4.17.19; carboxypeptidase Taq [EC:3.4.17.19]
K00097	Akenti_specific	Seawater_specific	Akenti_specific	63	19	71	48	2.24166	0.0146078	0.0427678	-8	pdxA; 4-hydroxythreonine-4-phosphate dehydrogenase [EC:1.1.1.262]
K00436	Akenti_specific	Seawater_specific	Seawater_specific	8	74	28	91	0.351351	0.0145743	0.0427111	-20	hoxH; NAD-reducing hydrogenase large subunit [EC:1.12.1.2]
K00928	Akenti_specific	Seawater_specific	Akenti_specific	74	8	91	28	2.84615	0.0145743	0.0427111	-17	lysC; aspartate kinase [EC:2.7.2.4]
K02346	Akenti_specific	Seawater_specific	Akenti_specific	52	30	54	65	2.08642	0.0145428	0.0426734	-2	dinB; DNA polymerase IV [EC:2.7.7.7]
K01436	Akenti_specific	Seawater_specific	Seawater_specific	30	52	65	54	0.47929	0.0145428	0.0426734	-35	K01436; amidohydrolase [EC:3.5.1.-]
K03654	Akenti_specific	Seawater_specific	Akenti_specific	55	27	59	60	2.07156	0.0145474	0.0426734	-4	recQ; ATP-dependent DNA helicase RecQ [EC:3.6.4.12]
K05606	Akenti_specific	Seawater_specific	Seawater_specific	34	48	71	48	0.478873	0.0144755	0.0425239	-37	MCEE, epi; methylmalonyl-CoA/ethylmalonyl-CoA epimerase [EC:5.1.99.1]
K13542	Akenti_specific	Seawater_specific	Akenti_specific	18	64	11	108	2.76136	0.0144254	0.0423974	7	cobA-hemD; uroporphyrinogen III methyltransferase / synthase [EC:2.1.1.107 4.2.1.75]
K17317	Akenti_specific	Seawater_specific	Akenti_specific	18	64	11	108	2.76136	0.0144254	0.0423974	7	gtsC, glcG; glucose/mannose transport system permease protein
K01258	Akenti_specific	Seawater_specific	Akenti_specific	18	64	11	108	2.76136	0.0144254	0.0423974	7	pepT; tripeptide aminopeptidase [EC:3.4.11.4]
K00383	Akenti_specific	Seawater_specific	Akenti_specific	45	37	44	75	2.0731	0.0142193	0.0418522	1	GSR, gor; glutathione reductase (NADPH) [EC:1.8.1.7]
K03312	Akenti_specific	Seawater_specific	Akenti_specific	21	61	14	105	2.58197	0.0138266	0.0407263	7	gltS; glutamate:Na+ symporter, ESS family
K15461	Akenti_specific	Seawater_specific	Akenti_specific	21	61	14	105	2.58197	0.0138266	0.0407263	7	mnmC; tRNA 5-methylaminomethyl-2-thiouridine biosynthesis bifunctional protein [EC:2.1.1.61 1.5.-.-]
K13985	Akenti_specific	Seawater_specific	Akenti_specific	29	53	23	96	2.28384	0.01383	0.0407263	6	NAPEPLD; N-acyl-phosphatidylethanolamine-hydrolysing phospholipase D [EC:3.1.4.54]
K08679	Akenti_specific	Seawater_specific	Akenti_specific	35	47	30	89	2.20922	0.0137645	0.0405922	5	E5.1.3.6; UDP-glucuronate 4-epimerase [EC:5.1.3.6]
K09701	Akenti_specific	Seawater_specific	Akenti_specific	35	47	30	89	2.20922	0.0137645	0.0405922	5	K09701; uncharacterized protein
K01126	Akenti_specific	Seawater_specific	Akenti_specific	55	27	58	61	2.1424	0.0137234	0.0405105	-3	E3.1.4.46, glpQ, ugpQ; glycerophosphoryl diester phosphodiesterase [EC:3.1.4.46]
K03698	Akenti_specific	Seawater_specific	Akenti_specific	15	67	8	111	3.10634	0.0136712	0.0403758	7	cbf, cbf1; 3'-5' exoribonuclease [EC:3.1.-.-]
K02007	Akenti_specific	Seawater_specific	Akenti_specific	15	67	8	111	3.10634	0.0136712	0.0403758	7	cbiM; cobalt/nickel transport system permease protein
K04773	Akenti_specific	Seawater_specific	Akenti_specific	56	26	60	59	2.11795	0.0136642	0.0403758	-4	sppA; protease IV [EC:3.4.21.-]
K06175	Akenti_specific	Seawater_specific	Akenti_specific	15	67	8	111	3.10634	0.0136712	0.0403758	7	truC; tRNA pseudouridine65 synthase [EC:5.4.99.26]
K00761	Akenti_specific	Seawater_specific	Seawater_specific	40	42	79	40	0.482218	0.0136671	0.0403758	-39	upp, UPRT; uracil phosphoribosyltransferase [EC:2.4.2.9]
K03979	Akenti_specific	Seawater_specific	Akenti_specific	78	4	99	20	3.93939	0.0136208	0.0403251	-21	obgE, cgtA; GTPase [EC:3.6.5.-]
K03551	Akenti_specific	Seawater_specific	Akenti_specific	78	4	99	20	3.93939	0.0136208	0.0403251	-21	ruvB; holliday junction DNA helicase RuvB [EC:3.6.4.12]
K02062	Akenti_specific	Seawater_specific	Seawater_specific	4	78	20	99	0.253846	0.0136208	0.0403251	-16	thiQ; thiamine transport system ATP-binding protein
K13995	Akenti_specific	Seawater_specific	Akenti_specific	13	69	6	113	3.54831	0.013526	0.0401028	7	nicF; maleamate amidohydrolase [EC:3.5.1.107]
K03168	Akenti_specific	Seawater_specific	Seawater_specific	69	13	113	6	0.281824	0.013526	0.0401028	-44	topA; DNA topoisomerase I [EC:5.99.1.2]
K01686	Akenti_specific	Seawater_specific	Akenti_specific	13	69	6	113	3.54831	0.013526	0.0401028	7	uxuA; mannonate dehydratase [EC:4.2.1.8]
K01749	Akenti_specific	Seawater_specific	Akenti_specific	72	10	87	32	2.64828	0.0133641	0.0396811	-15	hemC, HMBS; hydroxymethylbilane synthase [EC:2.5.1.61]
K00957	Akenti_specific	Seawater_specific	Akenti_specific	33	49	28	91	2.18878	0.012925	0.038396	5	cysD; sulfate adenylyltransferase subunit 2 [EC:2.7.7.4]
K00262	Akenti_specific	Seawater_specific	Akenti_specific	40	42	37	82	2.11068	0.0125483	0.0372952	3	E1.4.1.4, gdhA; glutamate dehydrogenase (NADP+) [EC:1.4.1.4]
K04691	Akenti_specific	Seawater_specific	Akenti_specific	24	58	17	102	2.48276	0.0124555	0.0370375	7	hhoB, degS; serine protease DegS [EC:3.4.21.-]
K02314	Akenti_specific	Seawater_specific	Akenti_specific	75	7	93	26	2.99539	0.0123077	0.0366158	-18	dnaB; replicative DNA helicase [EC:3.6.4.12]
K01485	Akenti_specific	Seawater_specific	Seawater_specific	23	59	55	64	0.453621	0.0121326	0.0361125	-32	codA; cytosine/creatinine deaminase [EC:3.5.4.1 3.5.4.21]
K02471	Akenti_specific	Seawater_specific	Seawater_specific	7	75	27	92	0.318025	0.0119776	0.0357725	-20	bacA; vitamin B12/bleomycin/antimicrobial peptide transport system ATP-binding/permease protein
K15777	Akenti_specific	Seawater_specific	Akenti_specific	11	71	4	115	4.45423	0.0120124	0.0357725	7	DOPA; 4,5-DOPA dioxygenase extradiol [EC:1.13.11.-]
K09906	Akenti_specific	Seawater_specific	Akenti_specific	11	71	4	115	4.45423	0.0120124	0.0357725	7	epmC; elongation factor P hydroxylase [EC:1.14.-.-]
K03303	Akenti_specific	Seawater_specific	Akenti_specific	11	71	4	115	4.45423	0.0120124	0.0357725	7	lctP; lactate permease
K08365	Akenti_specific	Seawater_specific	Akenti_specific	11	71	4	115	4.45423	0.0120124	0.0357725	7	merR; MerR family transcriptional regulator, mercuric resistance operon regulatory protein
K03322	Akenti_specific	Seawater_specific	Akenti_specific	11	71	4	115	4.45423	0.0120124	0.0357725	7	mntH; manganese transport protein
K03342	Akenti_specific	Seawater_specific	Akenti_specific	11	71	4	115	4.45423	0.0120124	0.0357725	7	pabBC; para-aminobenzoate synthetase / 4-amino-4-deoxychorismate lyase [EC:2.6.1.85 4.1.3.38]
K03817	Akenti_specific	Seawater_specific	Akenti_specific	11	71	4	115	4.45423	0.0120124	0.0357725	7	rimL; ribosomal-protein-serine acetyltransferase [EC:2.3.1.-]
K09761	Akenti_specific	Seawater_specific	Akenti_specific	75	7	92	27	3.14441	0.0119776	0.0357725	-17	rsmE; 16S rRNA (uracil1498-N3)-methyltransferase [EC:2.1.1.193]
K05343	Akenti_specific	Seawater_specific	Seawater_specific	7	75	27	92	0.318025	0.0119776	0.0357725	-20	treS; maltose alpha-D-glucosyltransferase / alpha-amylase [EC:5.4.99.16 3.2.1.1]
K00145	Akenti_specific	Seawater_specific	Akenti_specific	66	16	76	43	2.33388	0.0119409	0.0357346	-10	argC; N-acetyl-gamma-glutamyl-phosphate reductase [EC:1.2.1.38]
K19810	Akenti_specific	Seawater_specific	Akenti_specific	18	64	10	109	3.06562	0.0117421	0.0351568	8	epmB; L-lysine 2,3-aminomutase [EC:5.4.3.-]
K01495	Akenti_specific	Seawater_specific	Seawater_specific	49	33	92	27	0.435771	0.0117322	0.0351447	-43	GCH1, folE; GTP cyclohydrolase IA [EC:3.5.4.16]
K00024	Akenti_specific	Seawater_specific	Akenti_specific	70	12	83	36	2.53012	0.0116918	0.0350408	-13	mdh; malate dehydrogenase [EC:1.1.1.37]
K01872	Akenti_specific	Seawater_specific	Akenti_specific	77	5	97	22	3.49278	0.0116472	0.0349243	-20	AARS, alaS; alanyl-tRNA synthetase [EC:6.1.1.7]
K02493	Akenti_specific	Seawater_specific	Akenti_specific	77	5	97	22	3.49278	0.0116472	0.0349243	-20	hemK, prmC, HEMK; release factor glutamine methyltransferase [EC:2.1.1.297]
K01933	Akenti_specific	Seawater_specific	Akenti_specific	77	5	97	22	3.49278	0.0116472	0.0349243	-20	purM; phosphoribosylformylglycinamidine cyclo-ligase [EC:6.3.3.1]
K02963	Akenti_specific	Seawater_specific	Akenti_specific	77	5	97	22	3.49278	0.0116472	0.0349243	-20	RP-S18, MRPS18, rpsR; small subunit ribosomal protein S18
K16089	Akenti_specific	Seawater_specific	Akenti_specific	23	59	16	103	2.50953	0.0116041	0.0348639	7	TC.FEV.OM2, cirA, cfrA, hmuR; outer membrane receptor for ferrienterochelin and colicins
K13702	Akenti_specific	Seawater_specific	Seawater_specific	0	82	9	110	0	0.0115451	0.0347038	-9	ABHD10; abhydrolase domain-containing protein 10 [EC:3.1.1.93]
K15546	Akenti_specific	Seawater_specific	Seawater_specific	0	82	9	110	0	0.0115451	0.0347038	-9	boxR, bzdR; XRE family transcriptional regulator, aerobic/anaerobic benzoate catabolism transcriptional regulator
K17829	Akenti_specific	Seawater_specific	Seawater_specific	0	82	9	110	0	0.0115451	0.0347038	-9	ccrA; crotonyl-CoA reductase [EC:1.3.1.86]
K09493	Akenti_specific	Seawater_specific	Seawater_specific	0	82	9	110	0	0.0115451	0.0347038	-9	CCT1, TCP1; T-complex protein 1 subunit alpha
K14633	Akenti_specific	Seawater_specific	Seawater_specific	0	82	9	110	0	0.0115451	0.0347038	-9	gra6, RED2; ketoreductase RED2 [EC:1.1.1.-]
K06874	Akenti_specific	Seawater_specific	Seawater_specific	0	82	9	110	0	0.0115451	0.0347038	-9	K06874; zinc finger protein
K07049	Akenti_specific	Seawater_specific	Seawater_specific	0	82	9	110	0	0.0115451	0.0347038	-9	K07049; TatD-related deoxyribonuclease
K07579	Akenti_specific	Seawater_specific	Seawater_specific	0	82	9	110	0	0.0115451	0.0347038	-9	K07579; putative methylase
K10253	Akenti_specific	Seawater_specific	Seawater_specific	0	82	9	110	0	0.0115451	0.0347038	-9	K10253; DOPA 4,5-dioxygenase [EC:1.14.99.-]
K10220	Akenti_specific	Seawater_specific	Seawater_specific	0	82	9	110	0	0.0115451	0.0347038	-9	ligJ; 4-oxalmesaconate hydratase [EC:4.2.1.83]
K06943	Akenti_specific	Seawater_specific	Seawater_specific	0	82	9	110	0	0.0115451	0.0347038	-9	NOG1; nucleolar GTP-binding protein
K14727	Akenti_specific	Seawater_specific	Seawater_specific	0	82	9	110	0	0.0115451	0.0347038	-9	pcaL; 3-oxoadipate enol-lactonase / 4-carboxymuconolactone decarboxylase [EC:3.1.1.24 4.1.1.44]
K18068	Akenti_specific	Seawater_specific	Seawater_specific	0	82	9	110	0	0.0115451	0.0347038	-9	pht3; phthalate 4,5-dioxygenase [EC:1.14.12.7]
K02690	Akenti_specific	Seawater_specific	Seawater_specific	0	82	9	110	0	0.0115451	0.0347038	-9	psaB; photosystem I P700 chlorophyll a apoprotein A2
K02706	Akenti_specific	Seawater_specific	Seawater_specific	0	82	9	110	0	0.0115451	0.0347038	-9	psbD; photosystem II P680 reaction center D2 protein [EC:1.10.3.9]
K03042	Akenti_specific	Seawater_specific	Seawater_specific	0	82	9	110	0	0.0115451	0.0347038	-9	rpoA2; DNA-directed RNA polymerase subunit A" [EC:2.7.7.6]
K06912	Akenti_specific	Seawater_specific	Seawater_specific	0	82	9	110	0	0.0115451	0.0347038	-9	tfdA; alpha-ketoglutarate-dependent 2,4-dichlorophenoxyacetate dioxygenase [EC:1.14.11.-]
K16317	Akenti_specific	Seawater_specific	Seawater_specific	0	82	9	110	0	0.0115451	0.0347038	-9	trmY; tRNA (pseudouridine54-N1)-methyltransferase [EC:2.1.1.257]
K01240	Akenti_specific	Seawater_specific	Seawater_specific	0	82	9	110	0	0.0115451	0.0347038	-9	URH1; uridine nucleosidase [EC:3.2.2.3]
K03499	Akenti_specific	Seawater_specific	Akenti_specific	73	9	88	31	2.85732	0.0112584	0.0341631	-15	trkA, ktrA; trk system potassium uptake protein
K00185	Akenti_specific	Seawater_specific	Akenti_specific	32	50	26	93	2.28923	0.0110689	0.0336046	6	K00185; prokaryotic molybdopterin-containing oxidoreductase family, membrane subunit
K03925	Akenti_specific	Seawater_specific	Akenti_specific	61	21	67	52	2.25444	0.0110487	0.0335602	-6	mraZ; MraZ protein
K03548	Akenti_specific	Seawater_specific	Akenti_specific	27	55	20	99	2.43	0.0107194	0.0325764	7	perM; putative permease
K11928	Akenti_specific	Seawater_specific	Akenti_specific	27	55	20	99	2.43	0.0107194	0.0325764	7	putP; sodium/proline symporter
K14057	Akenti_specific	Seawater_specific	Akenti_specific	5	77	0	119	inf	0.010493	0.0319202	5	abgR; LysR family transcriptional regulator, regulator of abg operon
K07741	Akenti_specific	Seawater_specific	Akenti_specific	5	77	0	119	inf	0.010493	0.0319202	5	antB; anti-repressor protein
K04114	Akenti_specific	Seawater_specific	Akenti_specific	5	77	0	119	inf	0.010493	0.0319202	5	bcrA, badF; benzoyl-CoA reductase subunit A [EC:1.3.7.8]
K04115	Akenti_specific	Seawater_specific	Akenti_specific	5	77	0	119	inf	0.010493	0.0319202	5	bcrD, badG; benzoyl-CoA reductase subunit D [EC:1.3.7.8]
K00544	Akenti_specific	Seawater_specific	Akenti_specific	5	77	0	119	inf	0.010493	0.0319202	5	BHMT; betaine-homocysteine S-methyltransferase [EC:2.1.1.5]
K16168	Akenti_specific	Seawater_specific	Akenti_specific	5	77	0	119	inf	0.010493	0.0319202	5	bpsB, srsB; methyltransferase
K03757	Akenti_specific	Seawater_specific	Akenti_specific	5	77	0	119	inf	0.010493	0.0319202	5	cadB; cadaverine:lysine antiporter
K08794	Akenti_specific	Seawater_specific	Akenti_specific	5	77	0	119	inf	0.010493	0.0319202	5	CAMK1; calcium/calmodulin-dependent protein kinase I [EC:2.7.11.17]
K07227	Akenti_specific	Seawater_specific	Akenti_specific	5	77	0	119	inf	0.010493	0.0319202	5	chuX; heme iron utilization protein
K10621	Akenti_specific	Seawater_specific	Akenti_specific	5	77	0	119	inf	0.010493	0.0319202	5	cmtC, dhbA; 2,3-dihydroxy-p-cumate/2,3-dihydroxybenzoate 3,4-dioxygenase [EC:1.13.11.- 1.13.11.14]
K06034	Akenti_specific	Seawater_specific	Seawater_specific	2	80	15	104	0.173333	0.0101676	0.0319202	-13	comD; sulfopyruvate decarboxylase subunit alpha [EC:4.1.1.79]
K03933	Akenti_specific	Seawater_specific	Akenti_specific	5	77	0	119	inf	0.010493	0.0319202	5	cpbD; chitin-binding protein
K08194	Akenti_specific	Seawater_specific	Akenti_specific	5	77	0	119	inf	0.010493	0.0319202	5	dgoT; MFS transporter, ACS family, D-galactonate transporter
K17737	Akenti_specific	Seawater_specific	Akenti_specific	5	77	0	119	inf	0.010493	0.0319202	5	dhcR; LysR family transcriptional regulator, carnitine catabolism transcriptional activator
K00533	Akenti_specific	Seawater_specific	Akenti_specific	5	77	0	119	inf	0.010493	0.0319202	5	E1.12.7.2L; ferredoxin hydrogenase large subunit [EC:1.12.7.2]
K05841	Akenti_specific	Seawater_specific	Akenti_specific	5	77	0	119	inf	0.010493	0.0319202	5	E2.4.1.173; sterol 3beta-glucosyltransferase [EC:2.4.1.173]
K01678	Akenti_specific	Seawater_specific	Akenti_specific	5	77	0	119	inf	0.010493	0.0319202	5	E4.2.1.2AB, fumB; fumarate hydratase subunit beta [EC:4.2.1.2]
K01415	Akenti_specific	Seawater_specific	Akenti_specific	5	77	0	119	inf	0.010493	0.0319202	5	ECE; endothelin-converting enzyme [EC:3.4.24.71]
K03735	Akenti_specific	Seawater_specific	Akenti_specific	5	77	0	119	inf	0.010493	0.0319202	5	eutB; ethanolamine ammonia-lyase large subunit [EC:4.3.1.7]
K03736	Akenti_specific	Seawater_specific	Akenti_specific	5	77	0	119	inf	0.010493	0.0319202	5	eutC; ethanolamine ammonia-lyase small subunit [EC:4.3.1.7]
K04030	Akenti_specific	Seawater_specific	Akenti_specific	5	77	0	119	inf	0.010493	0.0319202	5	eutQ; ethanolamine utilization protein EutQ
K07679	Akenti_specific	Seawater_specific	Akenti_specific	5	77	0	119	inf	0.010493	0.0319202	5	evgS, bvgS; two-component system, NarL family, sensor histidine kinase EvgS [EC:2.7.13.3]
K02380	Akenti_specific	Seawater_specific	Akenti_specific	5	77	0	119	inf	0.010493	0.0319202	5	fdhE; FdhE protein
K03855	Akenti_specific	Seawater_specific	Akenti_specific	5	77	0	119	inf	0.010493	0.0319202	5	fixX; ferredoxin like protein
K09681	Akenti_specific	Seawater_specific	Akenti_specific	5	77	0	119	inf	0.010493	0.0319202	5	gltC; LysR family transcriptional regulator, transcription activator of glutamate synthase operon
K19997	Akenti_specific	Seawater_specific	Akenti_specific	5	77	0	119	inf	0.010493	0.0319202	5	gnu; GlcNAc-P-P-Und epimerase [EC:5.1.3.26]
K19777	Akenti_specific	Seawater_specific	Akenti_specific	5	77	0	119	inf	0.010493	0.0319202	5	hdeA; acid stress chaperone HdeA
K19166	Akenti_specific	Seawater_specific	Akenti_specific	5	77	0	119	inf	0.010493	0.0319202	5	higB; mRNA interferase HigB [EC:3.1.-.-]
K10948	Akenti_specific	Seawater_specific	Akenti_specific	5	77	0	119	inf	0.010493	0.0319202	5	hlyA; hemolysin
K09814	Akenti_specific	Seawater_specific	Akenti_specific	5	77	0	119	inf	0.010493	0.0319202	5	hrtA; hemin transport system ATP-binding protein [EC:3.6.3.-]
K16047	Akenti_specific	Seawater_specific	Akenti_specific	5	77	0	119	inf	0.010493	0.0319202	5	hsaA; 3-hydroxy-9,10-secoandrosta-1,3,5(10)-triene-9,17-dione monooxygenase [EC:1.14.14.12]
K03620	Akenti_specific	Seawater_specific	Akenti_specific	5	77	0	119	inf	0.010493	0.0319202	5	hyaC; Ni/Fe-hydrogenase 1 B-type cytochrome subunit
K14475	Akenti_specific	Seawater_specific	Akenti_specific	5	77	0	119	inf	0.010493	0.0319202	5	ICP; inhibitor of cysteine peptidase
K03894	Akenti_specific	Seawater_specific	Akenti_specific	5	77	0	119	inf	0.010493	0.0319202	5	iucA; N2-citryl-N6-acetyl-N6-hydroxylysine synthase [EC:6.3.2.38]
K06962	Akenti_specific	Seawater_specific	Akenti_specific	5	77	0	119	inf	0.010493	0.0319202	5	K06962; uncharacterized protein
K07487	Akenti_specific	Seawater_specific	Akenti_specific	5	77	0	119	inf	0.010493	0.0319202	5	K07487; transposase
K08987	Akenti_specific	Seawater_specific	Akenti_specific	5	77	0	119	inf	0.010493	0.0319202	5	K08987; putative membrane protein
K09128	Akenti_specific	Seawater_specific	Seawater_specific	2	80	16	103	0.160938	0.0100575	0.0319202	-14	K09128; uncharacterized protein
K09143	Akenti_specific	Seawater_specific	Akenti_specific	5	77	0	119	inf	0.010493	0.0319202	5	K09143; uncharacterized protein
K11476	Akenti_specific	Seawater_specific	Akenti_specific	5	77	0	119	inf	0.010493	0.0319202	5	K11476, gntR; GntR family transcriptional regulator, gluconate operon transcriptional repressor
K18014	Akenti_specific	Seawater_specific	Akenti_specific	5	77	0	119	inf	0.010493	0.0319202	5	kal; 3-aminobutyryl-CoA ammonia-lyase [EC:4.3.1.14]
K11746	Akenti_specific	Seawater_specific	Akenti_specific	5	77	0	119	inf	0.010493	0.0319202	5	kefF; glutathione-regulated potassium-efflux system ancillary protein KefF
K05339	Akenti_specific	Seawater_specific	Akenti_specific	5	77	0	119	inf	0.010493	0.0319202	5	lrgB; holin-like protein LrgB
K01254	Akenti_specific	Seawater_specific	Seawater_specific	2	80	16	103	0.160938	0.0100575	0.0319202	-14	LTA4H; leukotriene-A4 hydrolase [EC:3.3.2.6]
K11104	Akenti_specific	Seawater_specific	Akenti_specific	5	77	0	119	inf	0.010493	0.0319202	5	melB; melibiose permease
K00947	Akenti_specific	Seawater_specific	Akenti_specific	5	77	0	119	inf	0.010493	0.0319202	5	mosAB; molybdenum storage protein
K18991	Akenti_specific	Seawater_specific	Akenti_specific	5	77	0	119	inf	0.010493	0.0319202	5	mtrA; AraC family transcriptional regulator, activator of mtrCDE
K03633	Akenti_specific	Seawater_specific	Akenti_specific	5	77	0	119	inf	0.010493	0.0319202	5	mukF; chromosome partition protein MukF
K02570	Akenti_specific	Seawater_specific	Akenti_specific	5	77	0	119	inf	0.010493	0.0319202	5	napD; periplasmic nitrate reductase NapD
K00368	Akenti_specific	Seawater_specific	Akenti_specific	5	77	0	119	inf	0.010493	0.0319202	5	nirK; nitrite reductase (NO-forming) [EC:1.7.2.1]
K09695	Akenti_specific	Seawater_specific	Akenti_specific	5	77	0	119	inf	0.010493	0.0319202	5	nodI; lipooligosaccharide transport system ATP-binding protein
K04561	Akenti_specific	Seawater_specific	Akenti_specific	5	77	0	119	inf	0.010493	0.0319202	5	norB; nitric oxide reductase subunit B [EC:1.7.2.5]
K08720	Akenti_specific	Seawater_specific	Akenti_specific	5	77	0	119	inf	0.010493	0.0319202	5	ompU; outer membrane protein OmpU
K09251	Akenti_specific	Seawater_specific	Akenti_specific	5	77	0	119	inf	0.010493	0.0319202	5	patA; putrescine aminotransferase [EC:2.6.1.82]
K02626	Akenti_specific	Seawater_specific	Akenti_specific	5	77	0	119	inf	0.010493	0.0319202	5	pdaD; arginine decarboxylase [EC:4.1.1.19]
K13923	Akenti_specific	Seawater_specific	Akenti_specific	5	77	0	119	inf	0.010493	0.0319202	5	pduL; phosphate propanoyltransferase [EC:2.3.1.222]
K13921	Akenti_specific	Seawater_specific	Akenti_specific	5	77	0	119	inf	0.010493	0.0319202	5	pduQ; 1-propanol dehydrogenase
K19697	Akenti_specific	Seawater_specific	Akenti_specific	5	77	0	119	inf	0.010493	0.0319202	5	pduW; propionate kinase [EC:2.7.2.15]
K08256	Akenti_specific	Seawater_specific	Seawater_specific	2	80	15	104	0.173333	0.0101676	0.0319202	-13	pimA; phosphatidyl-myo-inositol alpha-mannosyltransferase [EC:2.4.1.345]
K03763	Akenti_specific	Seawater_specific	Akenti_specific	5	77	0	119	inf	0.010493	0.0319202	5	polC; DNA polymerase III subunit alpha, Gram-positive type [EC:2.7.7.7]
K00169	Akenti_specific	Seawater_specific	Akenti_specific	5	77	0	119	inf	0.010493	0.0319202	5	porA; pyruvate ferredoxin oxidoreductase alpha subunit [EC:1.2.7.1]
K00170	Akenti_specific	Seawater_specific	Akenti_specific	5	77	0	119	inf	0.010493	0.0319202	5	porB; pyruvate ferredoxin oxidoreductase beta subunit [EC:1.2.7.1]
K00172	Akenti_specific	Seawater_specific	Akenti_specific	5	77	0	119	inf	0.010493	0.0319202	5	porG; pyruvate ferredoxin oxidoreductase gamma subunit [EC:1.2.7.1]
K01598	Akenti_specific	Seawater_specific	Akenti_specific	5	77	0	119	inf	0.010493	0.0319202	5	PPCDC, coaC; phosphopantothenoylcysteine decarboxylase [EC:4.1.1.36]
K02744	Akenti_specific	Seawater_specific	Akenti_specific	5	77	0	119	inf	0.010493	0.0319202	5	PTS-Aga-EIIA, agaF; PTS system, N-acetylgalactosamine-specific IIA component [EC:2.7.1.-]
K02746	Akenti_specific	Seawater_specific	Akenti_specific	5	77	0	119	inf	0.010493	0.0319202	5	PTS-Aga-EIIC, agaW; PTS system, N-acetylgalactosamine-specific IIC component
K02747	Akenti_specific	Seawater_specific	Akenti_specific	5	77	0	119	inf	0.010493	0.0319202	5	PTS-Aga-EIID, agaE; PTS system, N-acetylgalactosamine-specific IID component
K02761	Akenti_specific	Seawater_specific	Akenti_specific	5	77	0	119	inf	0.010493	0.0319202	5	PTS-Cel-EIIC, celB, chbC; PTS system, cellobiose-specific IIC component
K03604	Akenti_specific	Seawater_specific	Akenti_specific	5	77	0	119	inf	0.010493	0.0319202	5	purR; LacI family transcriptional regulator, purine nucleotide synthesis repressor
K08322	Akenti_specific	Seawater_specific	Akenti_specific	5	77	0	119	inf	0.010493	0.0319202	5	rspB; L-gulonate 5-dehydrogenase [EC:1.1.1.380]
K03747	Akenti_specific	Seawater_specific	Akenti_specific	5	77	0	119	inf	0.010493	0.0319202	5	smg; Smg protein
K19956	Akenti_specific	Seawater_specific	Akenti_specific	5	77	0	119	inf	0.010493	0.0319202	5	sorE; L-sorbose 1-phosphate reductase [EC:1.1.1.-]
K05875	Akenti_specific	Seawater_specific	Akenti_specific	5	77	0	119	inf	0.010493	0.0319202	5	tar; methyl-accepting chemotaxis protein II, aspartate sensor receptor
K10930	Akenti_specific	Seawater_specific	Akenti_specific	5	77	0	119	inf	0.010493	0.0319202	5	tcpA; toxin coregulated pilin
K03146	Akenti_specific	Seawater_specific	Akenti_specific	5	77	0	119	inf	0.010493	0.0319202	5	THI4, THI1; cysteine-dependent adenosine diphosphate thiazole synthase [EC:2.4.2.60]
K18278	Akenti_specific	Seawater_specific	Akenti_specific	5	77	0	119	inf	0.010493	0.0319202	5	THI5; pyrimidine precursor biosynthesis enzyme
K01236	Akenti_specific	Seawater_specific	Akenti_specific	5	77	0	119	inf	0.010493	0.0319202	5	treZ, glgZ; maltooligosyltrehalose trehalohydrolase [EC:3.2.1.141]
K06967	Akenti_specific	Seawater_specific	Akenti_specific	5	77	0	119	inf	0.010493	0.0319202	5	trmK; tRNA (adenine22-N1)-methyltransferase [EC:2.1.1.217]
K20861	Akenti_specific	Seawater_specific	Akenti_specific	5	77	0	119	inf	0.010493	0.0319202	5	ybjI; FMN hydrolase / 5-amino-6-(5-phospho-D-ribitylamino)uracil phosphatase [EC:3.1.3.102 3.1.3.104]
K08369	Akenti_specific	Seawater_specific	Akenti_specific	5	77	0	119	inf	0.010493	0.0319202	5	ydjE; MFS transporter, putative metabolite:H+ symporter
K18471	Akenti_specific	Seawater_specific	Akenti_specific	5	77	0	119	inf	0.010493	0.0319202	5	ydjG; methylglyoxal reductase [EC:1.1.1.-]
K16961	Akenti_specific	Seawater_specific	Akenti_specific	5	77	0	119	inf	0.010493	0.0319202	5	yxeM; putative amino-acid transport system substrate-binding protein
K16962	Akenti_specific	Seawater_specific	Akenti_specific	5	77	0	119	inf	0.010493	0.0319202	5	yxeN; putative amino-acid transport system permease protein
K18778	Akenti_specific	Seawater_specific	Akenti_specific	5	77	0	119	inf	0.010493	0.0319202	5	zapD; cell division protein ZapD
K07803	Akenti_specific	Seawater_specific	Akenti_specific	5	77	0	119	inf	0.010493	0.0319202	5	zraP; zinc resistance-associated protein
K01711	Akenti_specific	Seawater_specific	Akenti_specific	37	45	32	87	2.23542	0.0100248	0.0318508	5	gmd, GMDS; GDPmannose 4,6-dehydratase [EC:4.2.1.47]
K02017	Akenti_specific	Seawater_specific	Akenti_specific	37	45	32	87	2.23542	0.0100248	0.0318508	5	modC; molybdate transport system ATP-binding protein [EC:3.6.3.29]
K02189	Akenti_specific	Seawater_specific	Akenti_specific	15	67	7	112	3.58209	0.0100062	0.0318251	8	cbiG; cobalt-precorrin 5A hydrolase [EC:3.7.1.12]
K07742	Akenti_specific	Seawater_specific	Seawater_specific	14	68	40	79	0.406618	0.00985458	0.0313592	-26	ylxR; uncharacterized protein
K03744	Akenti_specific	Seawater_specific	Akenti_specific	36	46	31	88	2.2216	0.00983583	0.031316	5	lemA; LemA protein
K09017	Akenti_specific	Seawater_specific	Akenti_specific	36	46	31	88	2.2216	0.00983583	0.031316	5	rutR; TetR/AcrR family transcriptional regulator
K11472	Akenti_specific	Seawater_specific	Seawater_specific	19	63	49	70	0.430839	0.00980833	0.0312612	-30	glcE; glycolate oxidase FAD binding subunit
K01879	Akenti_specific	Seawater_specific	Akenti_specific	48	34	47	72	2.1627	0.00968338	0.0308791	1	glyS; glycyl-tRNA synthetase beta chain [EC:6.1.1.14]
K17865	Akenti_specific	Seawater_specific	Akenti_specific	23	59	15	104	2.70282	0.00963751	0.030749	8	croR; 3-hydroxybutyryl-CoA dehydratase [EC:4.2.1.55]
K09888	Akenti_specific	Seawater_specific	Akenti_specific	51	31	51	68	2.19355	0.00961522	0.030694	0	zapA; cell division protein ZapA
K03272	Akenti_specific	Seawater_specific	Akenti_specific	45	37	43	76	2.14959	0.00952919	0.0304353	2	gmhC, hldE, waaE, rfaE; D-beta-D-heptose 7-phosphate kinase / D-beta-D-heptose 1-phosphate adenosyltransferase [EC:2.7.1.167 2.7.7.70]
K01278	Akenti_specific	Seawater_specific	Seawater_specific	18	64	47	72	0.430851	0.00945328	0.0302088	-29	DPP4, CD26; dipeptidyl-peptidase 4 [EC:3.4.14.5]
K07407	Akenti_specific	Seawater_specific	Akenti_specific	17	65	9	110	3.19658	0.00940619	0.0300741	8	E3.2.1.22B, galA, rafA; alpha-galactosidase [EC:3.2.1.22]
K05836	Akenti_specific	Seawater_specific	Akenti_specific	17	65	9	110	3.19658	0.00940619	0.0300741	8	hutC; GntR family transcriptional regulator, histidine utilization repressor
K18199	Akenti_specific	Seawater_specific	Akenti_specific	17	65	9	110	3.19658	0.00940619	0.0300741	8	inhA; cyclohexyl-isocyanide hydratase [EC:4.2.1.103]
K18850	Akenti_specific	Seawater_specific	Akenti_specific	17	65	9	110	3.19658	0.00940619	0.0300741	8	ycfD; 50S ribosomal protein L16 3-hydroxylase [EC:1.14.11.47]
K02337	Akenti_specific	Seawater_specific	Akenti_specific	76	6	94	25	3.36879	0.0093368	0.0299152	-18	dnaE; DNA polymerase III subunit alpha [EC:2.7.7.7]
K05366	Akenti_specific	Seawater_specific	Akenti_specific	76	6	94	25	3.36879	0.0093368	0.0299152	-18	mrcA; penicillin-binding protein 1A [EC:2.4.1.129 3.4.16.4]
K01881	Akenti_specific	Seawater_specific	Akenti_specific	79	3	101	18	4.69307	0.00931825	0.0298873	-22	PARS, proS; prolyl-tRNA synthetase [EC:6.1.1.15]
K10697	Akenti_specific	Seawater_specific	Seawater_specific	3	79	18	101	0.21308	0.00931825	0.0298873	-15	rpaA; two-component system, OmpR family, response regulator RpaA
K18955	Akenti_specific	Seawater_specific	Seawater_specific	3	79	18	101	0.21308	0.00931825	0.0298873	-15	whiB1_2_3_4; WhiB family transcriptional regulator, redox-sensing transcriptional regulator
K15510	Akenti_specific	Seawater_specific	Seawater_specific	1	81	13	106	0.100665	0.00904214	0.0290476	-12	fgd1; coenzyme F420-dependent glucose-6-phosphate dehydrogenase [EC:1.1.98.2]
K07094	Akenti_specific	Seawater_specific	Seawater_specific	1	81	13	106	0.100665	0.00904214	0.0290476	-12	pcrB; putative glycerol-1-phosphate prenyltransferase [EC:2.5.1.-]
K08303	Akenti_specific	Seawater_specific	Akenti_specific	30	52	23	96	2.40803	0.00888641	0.0285776	7	K08303; putative protease [EC:3.4.-.-]
K10217	Akenti_specific	Seawater_specific	Seawater_specific	10	72	33	86	0.361953	0.00875576	0.0281723	-23	dmpC, xylG, praB; aminomuconate-semialdehyde/2-hydroxymuconate-6-semialdehyde dehydrogenase [EC:1.2.1.32 1.2.1.85]
K16011	Akenti_specific	Seawater_specific	Akenti_specific	26	56	18	101	2.60516	0.00871108	0.0280434	8	algA, xanB, rfbA, wbpW, pslB; mannose-1-phosphate guanylyltransferase / mannose-6-phosphate isomerase [EC:2.7.7.13 5.3.1.8]
K00124	Akenti_specific	Seawater_specific	Akenti_specific	26	56	18	101	2.60516	0.00871108	0.0280434	8	fdoH, fdsB; formate dehydrogenase iron-sulfur subunit
K17828	Akenti_specific	Seawater_specific	Akenti_specific	26	56	18	101	2.60516	0.00871108	0.0280434	8	pyrDI; dihydroorotate dehydrogenase (NAD+) catalytic subunit [EC:1.3.1.14]
K00096	Akenti_specific	Seawater_specific	Akenti_specific	7	75	1	118	11.0133	0.00850516	0.0274241	6	araM, egsA; glycerol-1-phosphate dehydrogenase [NAD(P)+] [EC:1.1.1.261]
K12989	Akenti_specific	Seawater_specific	Akenti_specific	7	75	1	118	11.0133	0.00850516	0.0274241	6	lpcC; mannosyltransferase [EC:2.4.1.-]
K13694	Akenti_specific	Seawater_specific	Akenti_specific	7	75	1	118	11.0133	0.00850516	0.0274241	6	mepS, spr; murein DD-endopeptidase / murein LD-carboxypeptidase [EC:3.4.-.- 3.4.17.13]
K00978	Akenti_specific	Seawater_specific	Akenti_specific	7	75	1	118	11.0133	0.00850516	0.0274241	6	rfbF; glucose-1-phosphate cytidylyltransferase [EC:2.7.7.33]
K01178	Akenti_specific	Seawater_specific	Akenti_specific	7	75	1	118	11.0133	0.00850516	0.0274241	6	SGA1; glucoamylase [EC:3.2.1.3]
K19048	Akenti_specific	Seawater_specific	Akenti_specific	7	75	1	118	11.0133	0.00850516	0.0274241	6	symE; toxic protein SymE
K01940	Akenti_specific	Seawater_specific	Akenti_specific	65	17	73	46	2.40935	0.00844784	0.0273262	-8	argG, ASS1; argininosuccinate synthase [EC:6.3.4.5]
K16319	Akenti_specific	Seawater_specific	Akenti_specific	9	73	2	117	7.21233	0.00823999	0.0266681	7	andAc; anthranilate 1,2-dioxygenase large subunit [EC:1.14.12.1]
K07486	Akenti_specific	Seawater_specific	Akenti_specific	9	73	2	117	7.21233	0.00823999	0.0266681	7	K07486; transposase
K09941	Akenti_specific	Seawater_specific	Akenti_specific	9	73	2	117	7.21233	0.00823999	0.0266681	7	K09941; uncharacterized protein
K14392	Akenti_specific	Seawater_specific	Akenti_specific	9	73	2	117	7.21233	0.00823999	0.0266681	7	panF; sodium/pantothenate symporter
K15255	Akenti_specific	Seawater_specific	Akenti_specific	9	73	2	117	7.21233	0.00823999	0.0266681	7	PIF1; ATP-dependent DNA helicase PIF1 [EC:3.6.4.12]
K14266	Akenti_specific	Seawater_specific	Akenti_specific	9	73	2	117	7.21233	0.00823999	0.0266681	7	prnA, rebH, ktzQ; tryptophan 7-halogenase [EC:1.14.19.9]
K02939	Akenti_specific	Seawater_specific	Akenti_specific	78	4	98	21	4.17857	0.00821196	0.0266681	-20	RP-L9, MRPL9, rplI; large subunit ribosomal protein L9
K11107	Akenti_specific	Seawater_specific	Akenti_specific	9	73	2	117	7.21233	0.00823999	0.0266681	7	yfaE; ferredoxin
K09456	Akenti_specific	Seawater_specific	Akenti_specific	10	72	3	116	5.37037	0.00818019	0.0265878	7	aidB; putative acyl-CoA dehydrogenase
K01676	Akenti_specific	Seawater_specific	Akenti_specific	42	40	38	81	2.23816	0.00817891	0.0265878	4	E4.2.1.2A, fumA, fumB; fumarate hydratase, class I [EC:4.2.1.2]
K01941	Akenti_specific	Seawater_specific	Akenti_specific	10	72	3	116	5.37037	0.00818019	0.0265878	7	E6.3.4.6; urea carboxylase [EC:6.3.4.6]
K14584	Akenti_specific	Seawater_specific	Akenti_specific	10	72	3	116	5.37037	0.00818019	0.0265878	7	nahD; 2-hydroxychromene-2-carboxylate isomerase [EC:5.99.1.4]
K06045	Akenti_specific	Seawater_specific	Akenti_specific	10	72	3	116	5.37037	0.00818019	0.0265878	7	shc; squalene-hopene/tetraprenyl-beta-curcumene cyclase [EC:5.4.99.17 4.2.1.129]
K16922	Akenti_specific	Seawater_specific	Akenti_specific	10	72	3	116	5.37037	0.00818019	0.0265878	7	yydH; putative peptide zinc metalloprotease protein
K03500	Akenti_specific	Seawater_specific	Akenti_specific	66	16	75	44	2.42	0.00804144	0.0262209	-9	rsmB, sun; 16S rRNA (cytosine967-C5)-methyltransferase [EC:2.1.1.176]
K05779	Akenti_specific	Seawater_specific	Akenti_specific	16	66	8	111	3.36364	0.00773328	0.0252785	8	ABC.VB1X.A; putative thiamine transport system ATP-binding protein
K16135	Akenti_specific	Seawater_specific	Akenti_specific	16	66	8	111	3.36364	0.00773328	0.0252785	8	dmlR; LysR family transcriptional regulator, transcriptional activator for dmlA
K03472	Akenti_specific	Seawater_specific	Akenti_specific	16	66	8	111	3.36364	0.00773328	0.0252785	8	epd; D-erythrose 4-phosphate dehydrogenase [EC:1.2.1.72]
K00375	Akenti_specific	Seawater_specific	Akenti_specific	25	57	17	102	2.63158	0.00774825	0.0252785	8	K00375; GntR family transcriptional regulator / MocR family aminotransferase
K00677	Akenti_specific	Seawater_specific	Akenti_specific	70	12	82	37	2.63211	0.00774392	0.0252785	-12	lpxA; UDP-N-acetylglucosamine acyltransferase [EC:2.3.1.129]
K17247	Akenti_specific	Seawater_specific	Akenti_specific	25	57	17	102	2.63158	0.00774825	0.0252785	8	msrQ; methionine sulfoxide reductase heme-binding subunit
K07684	Akenti_specific	Seawater_specific	Akenti_specific	25	57	17	102	2.63158	0.00774825	0.0252785	8	narL; two-component system, NarL family, nitrate/nitrite response regulator NarL
K01141	Akenti_specific	Seawater_specific	Akenti_specific	25	57	17	102	2.63158	0.00774825	0.0252785	8	sbcB, exoI; exodeoxyribonuclease I [EC:3.1.11.1]
K01428	Akenti_specific	Seawater_specific	Seawater_specific	12	70	37	82	0.379923	0.00774392	0.0252785	-25	ureC; urease subunit alpha [EC:3.5.1.5]
K00966	Akenti_specific	Seawater_specific	Seawater_specific	16	66	45	74	0.398653	0.00767863	0.025173	-29	GMPP; mannose-1-phosphate guanylyltransferase [EC:2.7.7.13]
K11755	Akenti_specific	Seawater_specific	Seawater_specific	16	66	45	74	0.398653	0.00767863	0.025173	-29	hisIE; phosphoribosyl-ATP pyrophosphohydrolase / phosphoribosyl-AMP cyclohydrolase [EC:3.6.1.31 3.5.4.19]
K02358	Akenti_specific	Seawater_specific	Akenti_specific	60	22	64	55	2.34375	0.00767472	0.025173	-4	tuf, TUFM; elongation factor Tu
K08714	Akenti_specific	Seawater_specific	Akenti_specific	21	61	13	106	2.80706	0.00759562	0.0249412	8	VGSC; voltage-gated sodium channel
K14761	Akenti_specific	Seawater_specific	Seawater_specific	12	70	38	81	0.365414	0.00750565	0.0246591	-26	ybcJ; ribosome-associated protein
K10960	Akenti_specific	Seawater_specific	Seawater_specific	7	75	28	91	0.303333	0.00746499	0.0245388	-21	chlP, bchP; geranylgeranyl diphosphate/geranylgeranyl-bacteriochlorophyllide a reductase [EC:1.3.1.83 1.3.1.111]
K15269	Akenti_specific	Seawater_specific	Seawater_specific	7	75	28	91	0.303333	0.00746499	0.0245388	-21	pecM; probable blue pigment (indigoidine) exporter
K18676	Akenti_specific	Seawater_specific	Akenti_specific	14	68	6	113	3.87745	0.00743636	0.0244711	8	gspK; glucosamine kinase [EC:2.7.1.8]
K00179	Akenti_specific	Seawater_specific	Akenti_specific	14	68	6	113	3.87745	0.00743636	0.0244711	8	iorA; indolepyruvate ferredoxin oxidoreductase, alpha subunit [EC:1.2.7.8]
K12152	Akenti_specific	Seawater_specific	Akenti_specific	14	68	6	113	3.87745	0.00743636	0.0244711	8	nudJ; phosphatase NudJ [EC:3.6.1.-]
K00996	Akenti_specific	Seawater_specific	Akenti_specific	14	68	6	113	3.87745	0.00743636	0.0244711	8	rfbP; undecaprenyl-phosphate galactose phosphotransferase [EC:2.7.8.6]
K01208	Akenti_specific	Seawater_specific	Seawater_specific	5	77	23	96	0.271033	0.00732024	0.0241413	-18	cd, ma, nplT; cyclomaltodextrinase / maltogenic alpha-amylase / neopullulanase [EC:3.2.1.54 3.2.1.133 3.2.1.135]
K05602	Akenti_specific	Seawater_specific	Seawater_specific	5	77	23	96	0.271033	0.00732024	0.0241413	-18	hisN; histidinol-phosphatase [EC:3.1.3.15]
K18661	Akenti_specific	Seawater_specific	Seawater_specific	5	77	23	96	0.271033	0.00732024	0.0241413	-18	matB; malonyl-CoA/methylmalonyl-CoA synthetase [EC:6.2.1.-]
K07152	Akenti_specific	Seawater_specific	Akenti_specific	62	20	68	51	2.325	0.00728083	0.0240505	-6	SCO1_2; protein SCO1/2
K01459	Akenti_specific	Seawater_specific	Seawater_specific	9	73	32	87	0.335188	0.007169	0.023694	-23	E3.5.1.77; N-carbamoyl-D-amino-acid hydrolase [EC:3.5.1.77]
K01849	Akenti_specific	Seawater_specific	Seawater_specific	9	73	32	87	0.335188	0.007169	0.023694	-23	E5.4.99.2B, mcmA2; methylmalonyl-CoA mutase, C-terminal domain [EC:5.4.99.2]
K11329	Akenti_specific	Seawater_specific	Seawater_specific	9	73	32	87	0.335188	0.007169	0.023694	-23	rpaB; two-component system, OmpR family, response regulator RpaB
K08482	Akenti_specific	Seawater_specific	Seawater_specific	5	77	24	95	0.257035	0.0070805	0.0234397	-19	kaiC; circadian clock protein KaiC
K02600	Akenti_specific	Seawater_specific	Akenti_specific	77	5	95	24	3.89053	0.0070805	0.0234397	-18	nusA; N utilization substance protein A
K03433	Akenti_specific	Seawater_specific	Seawater_specific	5	77	24	95	0.257035	0.0070805	0.0234397	-19	psmB, prcB; proteasome beta subunit [EC:3.4.25.1]
K02825	Akenti_specific	Seawater_specific	Seawater_specific	30	52	67	52	0.447761	0.00658957	0.0218502	-37	pyrR; pyrimidine operon attenuation protein / uracil phosphoribosyltransferase [EC:2.4.2.9]
K18009	Akenti_specific	Seawater_specific	Seawater_specific	19	63	50	69	0.41619	0.00652161	0.0216367	-31	budC; meso-butanediol dehydrogenase / (S,S)-butanediol dehydrogenase / diacetyl reductase [EC:1.1.1.- 1.1.1.76 1.1.1.304]
K03648	Akenti_specific	Seawater_specific	Akenti_specific	54	28	55	64	2.24416	0.00648975	0.0215427	-1	UNG, UDG; uracil-DNA glycosylase [EC:3.2.2.27]
K11645	Akenti_specific	Seawater_specific	Seawater_specific	11	71	36	83	0.357199	0.00646389	0.0214686	-25	fbaB; fructose-bisphosphate aldolase, class I [EC:4.1.2.13]
K01011	Akenti_specific	Seawater_specific	Akenti_specific	48	34	46	73	2.24041	0.0063967	0.021257	2	TST, MPST, sseA; thiosulfate/3-mercaptopyruvate sulfurtransferase [EC:2.8.1.1 2.8.1.2]
K03738	Akenti_specific	Seawater_specific	Akenti_specific	12	70	4	115	4.92857	0.00632824	0.021041	8	aor; aldehyde:ferredoxin oxidoreductase [EC:1.2.7.5]
K09793	Akenti_specific	Seawater_specific	Akenti_specific	12	70	4	115	4.92857	0.00632824	0.021041	8	K09793; uncharacterized protein
K16066	Akenti_specific	Seawater_specific	Akenti_specific	12	70	4	115	4.92857	0.00632824	0.021041	8	ydfG; 3-hydroxy acid dehydrogenase / malonic semialdehyde reductase [EC:1.1.1.381 1.1.1.-]
K03299	Akenti_specific	Seawater_specific	Akenti_specific	49	33	47	72	2.27466	0.00624161	0.0207871	2	TC.GNTP; gluconate:H+ symporter, GntP family
K03568	Akenti_specific	Seawater_specific	Seawater_specific	33	49	72	47	0.439626	0.00624161	0.0207871	-39	tldD; TldD protein
K03775	Akenti_specific	Seawater_specific	Akenti_specific	27	55	19	100	2.58373	0.00622127	0.0207421	8	slyD; FKBP-type peptidyl-prolyl cis-trans isomerase SlyD [EC:5.2.1.8]
K06953	Akenti_specific	Seawater_specific	Seawater_specific	14	68	42	77	0.377451	0.00621712	0.0207397	-28	K06953; uncharacterized protein
K14168	Akenti_specific	Seawater_specific	Seawater_specific	0	82	10	109	0	0.00606982	0.0202594	-10	CTU1, NCS6; cytoplasmic tRNA 2-thiolation protein 1 [EC:2.7.7.-]
K18425	Akenti_specific	Seawater_specific	Seawater_specific	0	82	10	109	0	0.00606982	0.0202594	-10	dhaa; 3-hydroxy-D-aspartate aldolase [EC:4.1.3.41]
K00678	Akenti_specific	Seawater_specific	Seawater_specific	0	82	10	109	0	0.00606982	0.0202594	-10	LRAT; phosphatidylcholine-retinol O-acyltransferase [EC:2.3.1.135]
K05713	Akenti_specific	Seawater_specific	Seawater_specific	0	82	10	109	0	0.00606982	0.0202594	-10	mhpB; 2,3-dihydroxyphenylpropionate 1,2-dioxygenase [EC:1.13.11.16]
K01301	Akenti_specific	Seawater_specific	Seawater_specific	0	82	10	109	0	0.00606982	0.0202594	-10	NAALAD; N-acetylated-alpha-linked acidic dipeptidase [EC:3.4.17.21]
K02703	Akenti_specific	Seawater_specific	Seawater_specific	0	82	10	109	0	0.00606982	0.0202594	-10	psbA; photosystem II P680 reaction center D1 protein [EC:1.10.3.9]
K02708	Akenti_specific	Seawater_specific	Seawater_specific	0	82	10	109	0	0.00606982	0.0202594	-10	psbF; photosystem II cytochrome b559 subunit beta
K02711	Akenti_specific	Seawater_specific	Seawater_specific	0	82	10	109	0	0.00606982	0.0202594	-10	psbJ; photosystem II PsbJ protein
K07557	Akenti_specific	Seawater_specific	Seawater_specific	0	82	10	109	0	0.00606982	0.0202594	-10	tgtA2; archaeosine synthase [EC:2.6.1.97]
K18981	Akenti_specific	Seawater_specific	Seawater_specific	0	82	10	109	0	0.00606982	0.0202594	-10	udh; uronate dehydrogenase [EC:1.1.1.203]
K10859	Akenti_specific	Seawater_specific	Seawater_specific	8	74	30	89	0.320721	0.00600802	0.0201638	-22	ALKBH2; DNA oxidative demethylase [EC:1.14.11.33]
K06925	Akenti_specific	Seawater_specific	Akenti_specific	74	8	89	30	3.11798	0.00600802	0.0201638	-15	tsaE; tRNA threonylcarbamoyladenosine biosynthesis protein TsaE
K09022	Akenti_specific	Seawater_specific	Seawater_specific	58	24	104	15	0.348558	0.00595944	0.0200229	-46	ridA, tdcF, RIDA; 2-iminobutanoate/2-iminopropanoate deaminase [EC:3.5.99.10]
K03696	Akenti_specific	Seawater_specific	Seawater_specific	26	56	62	57	0.426843	0.00584048	0.0196341	-36	clpC; ATP-dependent Clp protease ATP-binding subunit ClpC
K01241	Akenti_specific	Seawater_specific	Seawater_specific	6	76	26	93	0.282389	0.00582349	0.0195878	-20	amn; AMP nucleosidase [EC:3.2.2.4]
K02111	Akenti_specific	Seawater_specific	Akenti_specific	76	6	93	26	3.54122	0.00582349	0.0195878	-17	ATPF1A, atpA; F-type H+-transporting ATPase subunit alpha [EC:7.1.2.2]
K01426	Akenti_specific	Seawater_specific	Seawater_specific	25	57	60	59	0.431287	0.00580124	0.0195346	-35	E3.5.1.4, amiE; amidase [EC:3.5.1.4]
K03974	Akenti_specific	Seawater_specific	Akenti_specific	16	66	7	112	3.87879	0.00572269	0.0192808	9	pspF; psp operon transcriptional activator
K01735	Akenti_specific	Seawater_specific	Akenti_specific	72	10	85	34	2.88	0.00569889	0.0192112	-13	aroB; 3-dehydroquinate synthase [EC:4.2.3.4]
K09121	Akenti_specific	Seawater_specific	Seawater_specific	10	72	34	85	0.347222	0.00569889	0.0192112	-24	larC; pyridinium-3,5-bisthiocarboxylic acid mononucleotide nickel chelatase [EC:4.99.1.12]
K13777	Akenti_specific	Seawater_specific	Akenti_specific	13	69	5	114	4.29565	0.00568706	0.0191927	8	atuF; geranyl-CoA carboxylase alpha subunit [EC:6.4.1.5]
K00045	Akenti_specific	Seawater_specific	Seawater_specific	2	80	17	102	0.15	0.00566432	0.0191265	-15	E1.1.1.67, mtlK; mannitol 2-dehydrogenase [EC:1.1.1.67]
K07406	Akenti_specific	Seawater_specific	Seawater_specific	2	80	17	102	0.15	0.00566432	0.0191265	-15	melA; alpha-galactosidase [EC:3.2.1.22]
K07654	Akenti_specific	Seawater_specific	Seawater_specific	2	80	17	102	0.15	0.00566432	0.0191265	-15	mtrB; two-component system, OmpR family, sensor histidine kinase MtrB [EC:2.7.13.3]
K11529	Akenti_specific	Seawater_specific	Akenti_specific	31	51	23	96	2.53708	0.00563103	0.0190459	8	gck, gckA, GLYCTK; glycerate 2-kinase [EC:2.7.1.165]
K03977	Akenti_specific	Seawater_specific	Akenti_specific	79	3	100	19	5.00333	0.00558763	0.0189096	-21	engA, der; GTPase
K01887	Akenti_specific	Seawater_specific	Akenti_specific	79	3	100	19	5.00333	0.00558763	0.0189096	-21	RARS, argS; arginyl-tRNA synthetase [EC:6.1.1.19]
K00872	Akenti_specific	Seawater_specific	Seawater_specific	17	65	47	72	0.400655	0.00557877	0.0189006	-30	thrB1; homoserine kinase [EC:2.7.1.39]
K00273	Akenti_specific	Seawater_specific	Seawater_specific	10	72	35	84	0.333333	0.00547988	0.018576	-25	DAO, aao; D-amino-acid oxidase [EC:1.4.3.3]
K00627	Akenti_specific	Seawater_specific	Akenti_specific	72	10	84	35	3	0.00547988	0.018576	-12	DLAT, aceF, pdhC; pyruvate dehydrogenase E2 component (dihydrolipoamide acetyltransferase) [EC:2.3.1.12]
K09458	Akenti_specific	Seawater_specific	Akenti_specific	72	10	84	35	3	0.00547988	0.018576	-12	fabF; 3-oxoacyl-[acyl-carrier-protein] synthase II [EC:2.3.1.179]
K06864	Akenti_specific	Seawater_specific	Seawater_specific	10	72	35	84	0.333333	0.00547988	0.018576	-25	larE; pyridinium-3,5-biscarboxylic acid mononucleotide sulfurtransferase [EC:4.4.1.37]
K00906	Akenti_specific	Seawater_specific	Akenti_specific	18	64	9	110	3.4375	0.00543803	0.0184753	9	aceK; isocitrate dehydrogenase kinase/phosphatase [EC:2.7.11.5 3.1.3.-]
K01825	Akenti_specific	Seawater_specific	Akenti_specific	18	64	9	110	3.4375	0.00543803	0.0184753	9	fadB; 3-hydroxyacyl-CoA dehydrogenase / enoyl-CoA hydratase / 3-hydroxybutyryl-CoA epimerase / enoyl-CoA isomerase [EC:1.1.1.35 4.2.1.17 5.1.2.3 5.3.3.8]
K07395	Akenti_specific	Seawater_specific	Akenti_specific	18	64	9	110	3.4375	0.00543803	0.0184753	9	K07395; putative proteasome-type protease
K20881	Akenti_specific	Seawater_specific	Akenti_specific	18	64	9	110	3.4375	0.00543803	0.0184753	9	yrfG; 5'-nucleotidase [EC:3.1.3.5]
K03743	Akenti_specific	Seawater_specific	Akenti_specific	43	39	38	81	2.3502	0.00528111	0.0179824	5	pncC; nicotinamide-nucleotide amidase [EC:3.5.1.42]
K05834	Akenti_specific	Seawater_specific	Akenti_specific	35	47	28	91	2.42021	0.00527044	0.0179561	7	rhtB; homoserine/homoserine lactone efflux protein
K04774	Akenti_specific	Seawater_specific	Akenti_specific	35	47	28	91	2.42021	0.00527044	0.0179561	7	sohB; serine protease SohB [EC:3.4.21.-]
K03305	Akenti_specific	Seawater_specific	Akenti_specific	35	47	28	91	2.42021	0.00527044	0.0179561	7	TC.POT; proton-dependent oligopeptide transporter, POT family
K13017	Akenti_specific	Seawater_specific	Akenti_specific	42	40	37	82	2.32703	0.00520719	0.0177705	5	wbpE, wlbC; UDP-2-acetamido-2-deoxy-ribo-hexuluronate aminotransferase [EC:2.6.1.98]
K01579	Akenti_specific	Seawater_specific	Akenti_specific	34	48	27	92	2.41358	0.00514401	0.0175648	7	panD; aspartate 1-decarboxylase [EC:4.1.1.11]
K02553	Akenti_specific	Seawater_specific	Akenti_specific	23	59	14	105	2.92373	0.00507167	0.0173275	9	rraA, menG; regulator of ribonuclease activity A
K05996	Akenti_specific	Seawater_specific	Seawater_specific	1	81	14	105	0.0925926	0.00497914	0.0170235	-13	cpt; carboxypeptidase T [EC:3.4.17.18]
K04100	Akenti_specific	Seawater_specific	Seawater_specific	1	81	14	105	0.0925926	0.00497914	0.0170235	-13	ligA; protocatechuate 4,5-dioxygenase, alpha chain [EC:1.13.11.8]
K11530	Akenti_specific	Seawater_specific	Seawater_specific	1	81	14	105	0.0925926	0.00497914	0.0170235	-13	lsrG; (4S)-4-hydroxy-5-phosphonooxypentane-2,3-dione isomerase [EC:5.3.1.32]
K00472	Akenti_specific	Seawater_specific	Seawater_specific	1	81	14	105	0.0925926	0.00497914	0.0170235	-13	P4HA; prolyl 4-hydroxylase [EC:1.14.11.2]
K13571	Akenti_specific	Seawater_specific	Seawater_specific	1	81	14	105	0.0925926	0.00497914	0.0170235	-13	pafA; proteasome accessory factor A [EC:6.3.1.19]
K15468	Akenti_specific	Seawater_specific	Seawater_specific	1	81	14	105	0.0925926	0.00497914	0.0170235	-13	pksS; cytochrome P450 PksS
K09788	Akenti_specific	Seawater_specific	Akenti_specific	20	62	11	108	3.16716	0.00497989	0.0170235	9	prpF; 2-methylaconitate isomerase [EC:5.3.3.-]
K16044	Akenti_specific	Seawater_specific	Seawater_specific	4	78	22	97	0.226107	0.00492251	0.0168939	-18	iolW; scyllo-inositol 2-dehydrogenase (NADP+) [EC:1.1.1.371]
K03432	Akenti_specific	Seawater_specific	Seawater_specific	4	78	22	97	0.226107	0.00492251	0.0168939	-18	psmA, prcA; proteasome alpha subunit [EC:3.4.25.1]
K14287	Akenti_specific	Seawater_specific	Seawater_specific	4	78	22	97	0.226107	0.00492251	0.0168939	-18	ybdL; methionine transaminase [EC:2.6.1.88]
K00164	Akenti_specific	Seawater_specific	Akenti_specific	61	21	65	54	2.41319	0.00488614	0.0167975	-4	OGDH, sucA; 2-oxoglutarate dehydrogenase E1 component [EC:1.2.4.2]
K06177	Akenti_specific	Seawater_specific	Akenti_specific	40	42	34	85	2.38095	0.00462093	0.0158947	6	rluA; tRNA pseudouridine32 synthase / 23S rRNA pseudouridine746 synthase [EC:5.4.99.28 5.4.99.29]
K08869	Akenti_specific	Seawater_specific	Seawater_specific	15	67	44	75	0.381615	0.00458853	0.0157922	-29	ADCK, ABC1; aarF domain-containing kinase
K18588	Akenti_specific	Seawater_specific	Akenti_specific	34	48	26	93	2.53365	0.00452621	0.0155866	8	COQ10; coenzyme Q-binding protein COQ10
K00012	Akenti_specific	Seawater_specific	Akenti_specific	62	20	66	53	2.48939	0.00445987	0.0153668	-4	UGDH, ugd; UDPglucose 6-dehydrogenase [EC:1.1.1.22]
K04061	Akenti_specific	Seawater_specific	Akenti_specific	17	65	8	111	3.62885	0.00429166	0.0147957	9	flhB2; flagellar biosynthesis protein
K06972	Akenti_specific	Seawater_specific	Akenti_specific	17	65	8	111	3.62885	0.00429166	0.0147957	9	PITRM1, PreP, CYM1; presequence protease [EC:3.4.24.-]
K18218	Akenti_specific	Seawater_specific	Akenti_specific	17	65	8	111	3.62885	0.00429166	0.0147957	9	tet35; tetracycline resistance efflux pump
K01537	Akenti_specific	Seawater_specific	Akenti_specific	19	63	10	109	3.2873	0.00425499	0.0146942	9	E3.6.3.8; Ca2+-transporting ATPase [EC:3.6.3.8]
K17290	Akenti_specific	Seawater_specific	Akenti_specific	19	63	10	109	3.2873	0.00425499	0.0146942	9	HTATIP2; oxidoreductase [EC:1.1.1.-]
K02019	Akenti_specific	Seawater_specific	Akenti_specific	19	63	10	109	3.2873	0.00425499	0.0146942	9	modE; molybdate transport system regulatory protein
K00355	Akenti_specific	Seawater_specific	Akenti_specific	19	63	10	109	3.2873	0.00425499	0.0146942	9	NQO1; NAD(P)H dehydrogenase (quinone) [EC:1.6.5.2]
K11153	Akenti_specific	Seawater_specific	Akenti_specific	19	63	10	109	3.2873	0.00425499	0.0146942	9	RDH12; retinol dehydrogenase 12 [EC:1.1.1.300]
K14415	Akenti_specific	Seawater_specific	Akenti_specific	19	63	10	109	3.2873	0.00425499	0.0146942	9	RTCB, rtcB; tRNA-splicing ligase RtcB (3'-phosphate/5'-hydroxy nucleic acid ligase) [EC:6.5.1.8]
K10778	Akenti_specific	Seawater_specific	Akenti_specific	25	57	16	103	2.82346	0.00423834	0.0146868	9	ada; AraC family transcriptional regulator, regulatory protein of adaptative response / methylated-DNA-[protein]-cysteine methyltransferase [EC:2.1.1.63]
K02259	Akenti_specific	Seawater_specific	Seawater_specific	57	25	103	16	0.354175	0.00423834	0.0146868	-46	COX15, ctaA; cytochrome c oxidase assembly protein subunit 15
K04040	Akenti_specific	Seawater_specific	Seawater_specific	5	77	25	94	0.244156	0.00423333	0.0146862	-20	chlG, bchG; chlorophyll/bacteriochlorophyll a synthase [EC:2.5.1.62 2.5.1.133]
K03438	Akenti_specific	Seawater_specific	Akenti_specific	77	5	94	25	4.09574	0.00423333	0.0146862	-17	mraW, rsmH; 16S rRNA (cytosine1402-N4)-methyltransferase [EC:2.1.1.199]
K00184	Akenti_specific	Seawater_specific	Akenti_specific	33	49	25	94	2.53224	0.00422444	0.0146721	8	K00184; prokaryotic molybdopterin-containing oxidoreductase family, iron-sulfur binding subunit
K02619	Akenti_specific	Seawater_specific	Akenti_specific	33	49	25	94	2.53224	0.00422444	0.0146721	8	pabC; 4-amino-4-deoxychorismate lyase [EC:4.1.3.38]
K15778	Akenti_specific	Seawater_specific	Akenti_specific	33	49	25	94	2.53224	0.00422444	0.0146721	8	pmm-pgm; phosphomannomutase / phosphoglucomutase [EC:5.4.2.8 5.4.2.2]
K01908	Akenti_specific	Seawater_specific	Akenti_specific	33	49	25	94	2.53224	0.00422444	0.0146721	8	prpE; propionyl-CoA synthetase [EC:6.2.1.17]
K02242	Akenti_specific	Seawater_specific	Akenti_specific	29	53	20	99	2.70849	0.00419196	0.0145926	9	comFC; competence protein ComFC
K07793	Akenti_specific	Seawater_specific	Akenti_specific	29	53	20	99	2.70849	0.00419196	0.0145926	9	tctA; putative tricarboxylic transport membrane protein
K05838	Akenti_specific	Seawater_specific	Akenti_specific	39	43	32	87	2.46584	0.00415915	0.014495	7	ybbN; putative thioredoxin
K15023	Akenti_specific	Seawater_specific	Akenti_specific	6	76	0	119	inf	0.00412225	0.0143747	6	acsE; 5-methyltetrahydrofolate corrinoid/iron sulfur protein methyltransferase [EC:2.1.1.258]
K19244	Akenti_specific	Seawater_specific	Akenti_specific	6	76	0	119	inf	0.00412225	0.0143747	6	ala; alanine dehydrogenase [EC:1.4.1.1]
K16320	Akenti_specific	Seawater_specific	Akenti_specific	6	76	0	119	inf	0.00412225	0.0143747	6	andAd; anthranilate 1,2-dioxygenase small subunit [EC:1.14.12.1]
K10022	Akenti_specific	Seawater_specific	Akenti_specific	6	76	0	119	inf	0.00412225	0.0143747	6	aotJ; arginine/ornithine transport system substrate-binding protein
K00853	Akenti_specific	Seawater_specific	Akenti_specific	6	76	0	119	inf	0.00412225	0.0143747	6	araB; L-ribulokinase [EC:2.7.1.16]
K07710	Akenti_specific	Seawater_specific	Akenti_specific	6	76	0	119	inf	0.00412225	0.0143747	6	atoS; two-component system, NtrC family, sensor histidine kinase AtoS [EC:2.7.13.3]
K15923	Akenti_specific	Seawater_specific	Akenti_specific	6	76	0	119	inf	0.00412225	0.0143747	6	AXY8, FUC95A, afcA; alpha-L-fucosidase 2 [EC:3.2.1.51]
K07664	Akenti_specific	Seawater_specific	Akenti_specific	11	71	3	116	5.99061	0.00399209	0.0143747	8	baeR, smeR; two-component system, OmpR family, response regulator BaeR
K20543	Akenti_specific	Seawater_specific	Akenti_specific	6	76	0	119	inf	0.00412225	0.0143747	6	bcsC; cellulose synthase operon protein C
K03594	Akenti_specific	Seawater_specific	Akenti_specific	38	44	31	88	2.45161	0.0039731	0.0143747	7	bfr; bacterioferritin [EC:1.16.3.1]
K01935	Akenti_specific	Seawater_specific	Akenti_specific	49	33	46	73	2.35639	0.00402244	0.0143747	3	bioD; dethiobiotin synthetase [EC:6.3.3.3]
K02171	Akenti_specific	Seawater_specific	Akenti_specific	6	76	0	119	inf	0.00412225	0.0143747	6	blaI; BlaI family transcriptional regulator, penicillinase repressor
K18364	Akenti_specific	Seawater_specific	Akenti_specific	10	72	2	117	8.125	0.00404244	0.0143747	8	bphH, xylJ, tesE; 2-oxopent-4-enoate/cis-2-oxohex-4-enoate hydratase [EC:4.2.1.80 4.2.1.132]
K00194	Akenti_specific	Seawater_specific	Akenti_specific	6	76	0	119	inf	0.00412225	0.0143747	6	cdhD, acsD; acetyl-CoA decarbonylase/synthase complex subunit delta [EC:2.1.1.245]
K00574	Akenti_specific	Seawater_specific	Akenti_specific	47	35	43	76	2.37342	0.00385102	0.0143747	4	cfa; cyclopropane-fatty-acyl-phospholipid synthase [EC:2.1.1.79]
K06597	Akenti_specific	Seawater_specific	Akenti_specific	6	76	0	119	inf	0.00412225	0.0143747	6	chpB; chemosensory pili system protein ChpB (putative protein-glutamate methylesterase)
K07240	Akenti_specific	Seawater_specific	Akenti_specific	37	45	30	89	2.43926	0.00389115	0.0143747	7	chrA; chromate transporter
K04333	Akenti_specific	Seawater_specific	Akenti_specific	6	76	0	119	inf	0.00412225	0.0143747	6	csgD; LuxR family transcriptional regulator, csgAB operon transcriptional regulatory protein
K15770	Akenti_specific	Seawater_specific	Akenti_specific	6	76	0	119	inf	0.00412225	0.0143747	6	cycB, ganO; arabinogalactan oligomer / maltooligosaccharide transport system substrate-binding protein
K09843	Akenti_specific	Seawater_specific	Akenti_specific	6	76	0	119	inf	0.00412225	0.0143747	6	CYP707A; (+)-abscisic acid 8'-hydroxylase [EC:1.14.14.137]
K07791	Akenti_specific	Seawater_specific	Akenti_specific	6	76	0	119	inf	0.00412225	0.0143747	6	dcuA; anaerobic C4-dicarboxylate transporter DcuA
K14333	Akenti_specific	Seawater_specific	Akenti_specific	6	76	0	119	inf	0.00412225	0.0143747	6	DHBD; 2,3-dihydroxybenzoate decarboxylase [EC:4.1.1.46]
K14623	Akenti_specific	Seawater_specific	Akenti_specific	6	76	0	119	inf	0.00412225	0.0143747	6	dinD; DNA-damage-inducible protein D
K04074	Akenti_specific	Seawater_specific	Akenti_specific	6	76	0	119	inf	0.00412225	0.0143747	6	divIVA; cell division initiation protein
K19171	Akenti_specific	Seawater_specific	Akenti_specific	6	76	0	119	inf	0.00412225	0.0143747	6	dndD; DNA sulfur modification protein DndD
K04486	Akenti_specific	Seawater_specific	Akenti_specific	11	71	3	116	5.99061	0.00399209	0.0143747	8	E3.1.3.15B; histidinol-phosphatase (PHP family) [EC:3.1.3.15]
K19427	Akenti_specific	Seawater_specific	Akenti_specific	6	76	0	119	inf	0.00412225	0.0143747	6	epsJ; glycosyltransferase EpsJ [EC:2.4.-.-]
K10844	Akenti_specific	Seawater_specific	Akenti_specific	10	72	2	117	8.125	0.00404244	0.0143747	8	ERCC2, XPD; DNA excision repair protein ERCC-2 [EC:3.6.4.12]
K16556	Akenti_specific	Seawater_specific	Akenti_specific	6	76	0	119	inf	0.00412225	0.0143747	6	exoM; succinoglycan biosynthesis protein ExoM [EC:2.4.-.-]
K20680	Akenti_specific	Seawater_specific	Akenti_specific	6	76	0	119	inf	0.00412225	0.0143747	6	fdtB; dTDP-3-amino-3,6-dideoxy-alpha-D-galactopyranose transaminase [EC:2.6.1.90]
K02402	Akenti_specific	Seawater_specific	Akenti_specific	6	76	0	119	inf	0.00412225	0.0143747	6	flhC; flagellar transcriptional activator FlhC
K02403	Akenti_specific	Seawater_specific	Akenti_specific	6	76	0	119	inf	0.00412225	0.0143747	6	flhD; flagellar transcriptional activator FlhD
K02423	Akenti_specific	Seawater_specific	Akenti_specific	6	76	0	119	inf	0.00412225	0.0143747	6	fliT; flagellar protein FliT
K19824	Akenti_specific	Seawater_specific	Akenti_specific	6	76	0	119	inf	0.00412225	0.0143747	6	fprB; rubrerythrin
K01818	Akenti_specific	Seawater_specific	Akenti_specific	11	71	3	116	5.99061	0.00399209	0.0143747	8	fucI; L-fucose/D-arabinose isomerase [EC:5.3.1.25 5.3.1.3]
K00879	Akenti_specific	Seawater_specific	Akenti_specific	6	76	0	119	inf	0.00412225	0.0143747	6	fucK; L-fuculokinase [EC:2.7.1.51]
K12538	Akenti_specific	Seawater_specific	Akenti_specific	6	76	0	119	inf	0.00412225	0.0143747	6	hasF, prtF; outer membrane protein, protease secretion system
K10815	Akenti_specific	Seawater_specific	Akenti_specific	6	76	0	119	inf	0.00412225	0.0143747	6	hcnB; hydrogen cyanide synthase HcnB [EC:1.4.99.5]
K01590	Akenti_specific	Seawater_specific	Akenti_specific	6	76	0	119	inf	0.00412225	0.0143747	6	hdc, HDC; histidine decarboxylase [EC:4.1.1.22]
K15669	Akenti_specific	Seawater_specific	Akenti_specific	6	76	0	119	inf	0.00412225	0.0143747	6	hddC; D-glycero-alpha-D-manno-heptose 1-phosphate guanylyltransferase [EC:2.7.7.71]
K18008	Akenti_specific	Seawater_specific	Akenti_specific	6	76	0	119	inf	0.00412225	0.0143747	6	hydA; [NiFe] hydrogenase small subunit [EC:1.12.2.1]
K00437	Akenti_specific	Seawater_specific	Akenti_specific	6	76	0	119	inf	0.00412225	0.0143747	6	hydB; [NiFe] hydrogenase large subunit [EC:1.12.2.1]
K17996	Akenti_specific	Seawater_specific	Akenti_specific	6	76	0	119	inf	0.00412225	0.0143747	6	hydB; sulfhydrogenase subunit beta (sulfur reductase) [EC:1.12.98.4]
K01305	Akenti_specific	Seawater_specific	Akenti_specific	6	76	0	119	inf	0.00412225	0.0143747	6	iadA; beta-aspartyl-dipeptidase (metallo-type) [EC:3.4.19.-]
K02523	Akenti_specific	Seawater_specific	Akenti_specific	64	18	69	50	2.57649	0.00384408	0.0143747	-5	ispB; octaprenyl-diphosphate synthase [EC:2.5.1.90]
K03895	Akenti_specific	Seawater_specific	Akenti_specific	6	76	0	119	inf	0.00412225	0.0143747	6	iucC; aerobactin synthase [EC:6.3.2.39]
K03897	Akenti_specific	Seawater_specific	Akenti_specific	6	76	0	119	inf	0.00412225	0.0143747	6	iucD; lysine N6-hydroxylase [EC:1.14.13.59]
K02351	Akenti_specific	Seawater_specific	Akenti_specific	6	76	0	119	inf	0.00412225	0.0143747	6	K02351; putative membrane protein
K06937	Akenti_specific	Seawater_specific	Akenti_specific	6	76	0	119	inf	0.00412225	0.0143747	6	K06937; 7,8-dihydro-6-hydroxymethylpterin dimethyltransferase [EC:2.1.1.-]
K06986	Akenti_specific	Seawater_specific	Akenti_specific	6	76	0	119	inf	0.00412225	0.0143747	6	K06986; uncharacterized protein
K07063	Akenti_specific	Seawater_specific	Akenti_specific	6	76	0	119	inf	0.00412225	0.0143747	6	K07063; uncharacterized protein
K07123	Akenti_specific	Seawater_specific	Akenti_specific	6	76	0	119	inf	0.00412225	0.0143747	6	K07123; uncharacterized protein
K07131	Akenti_specific	Seawater_specific	Akenti_specific	6	76	0	119	inf	0.00412225	0.0143747	6	K07131; uncharacterized protein
K07138	Akenti_specific	Seawater_specific	Akenti_specific	6	76	0	119	inf	0.00412225	0.0143747	6	K07138; uncharacterized protein
K07492	Akenti_specific	Seawater_specific	Akenti_specific	6	76	0	119	inf	0.00412225	0.0143747	6	K07492; putative transposase
K09922	Akenti_specific	Seawater_specific	Akenti_specific	6	76	0	119	inf	0.00412225	0.0143747	6	K09922; uncharacterized protein
K09947	Akenti_specific	Seawater_specific	Akenti_specific	6	76	0	119	inf	0.00412225	0.0143747	6	K09947; uncharacterized protein
K09962	Akenti_specific	Seawater_specific	Akenti_specific	6	76	0	119	inf	0.00412225	0.0143747	6	K09962; uncharacterized protein
K12055	Akenti_specific	Seawater_specific	Akenti_specific	6	76	0	119	inf	0.00412225	0.0143747	6	K12055, parA; chromosome partitioning related protein ParA
K15976	Akenti_specific	Seawater_specific	Akenti_specific	6	76	0	119	inf	0.00412225	0.0143747	6	K15976; putative NAD(P)H nitroreductase [EC:1.-.-.-]
K12254	Akenti_specific	Seawater_specific	Akenti_specific	6	76	0	119	inf	0.00412225	0.0143747	6	kauB; 4-guanidinobutyraldehyde dehydrogenase / NAD-dependent aldehyde dehydrogenase [EC:1.2.1.54 1.2.1.-]
K10979	Akenti_specific	Seawater_specific	Akenti_specific	6	76	0	119	inf	0.00412225	0.0143747	6	ku; DNA end-binding protein Ku
K08992	Akenti_specific	Seawater_specific	Akenti_specific	11	71	3	116	5.99061	0.00399209	0.0143747	8	lapA; lipopolysaccharide assembly protein A
K05798	Akenti_specific	Seawater_specific	Akenti_specific	6	76	0	119	inf	0.00412225	0.0143747	6	leuO; LysR family transcriptional regulator, transcriptional activator for leuABCD operon
K15932	Akenti_specific	Seawater_specific	Akenti_specific	6	76	0	119	inf	0.00412225	0.0143747	6	lndZ4; reductase LndZ4
K10910	Akenti_specific	Seawater_specific	Akenti_specific	6	76	0	119	inf	0.00412225	0.0143747	6	luxP; autoinducer 2-binding periplasmic protein LuxP
K15852	Akenti_specific	Seawater_specific	Akenti_specific	6	76	0	119	inf	0.00412225	0.0143747	6	luxR, vanR; LuxR family transcriptional regulator, transcriptional activator of the bioluminescence operon
K07788	Akenti_specific	Seawater_specific	Akenti_specific	6	76	0	119	inf	0.00412225	0.0143747	6	mdtB; multidrug efflux pump
K07789	Akenti_specific	Seawater_specific	Akenti_specific	6	76	0	119	inf	0.00412225	0.0143747	6	mdtC; multidrug efflux pump
K11742	Akenti_specific	Seawater_specific	Akenti_specific	6	76	0	119	inf	0.00412225	0.0143747	6	mdtI; spermidine export protein MdtI
K11743	Akenti_specific	Seawater_specific	Akenti_specific	6	76	0	119	inf	0.00412225	0.0143747	6	mdtJ; spermidine export protein MdtJ
K03804	Akenti_specific	Seawater_specific	Akenti_specific	6	76	0	119	inf	0.00412225	0.0143747	6	mukE; chromosome partition protein MukE
K02568	Akenti_specific	Seawater_specific	Akenti_specific	6	76	0	119	inf	0.00412225	0.0143747	6	napB; cytochrome c-type protein NapB
K00370	Akenti_specific	Seawater_specific	Akenti_specific	6	76	0	119	inf	0.00412225	0.0143747	6	narG, narZ, nxrA; nitrate reductase / nitrite oxidoreductase, alpha subunit [EC:1.7.5.1 1.7.99.-]
K18030	Akenti_specific	Seawater_specific	Akenti_specific	6	76	0	119	inf	0.00412225	0.0143747	6	nicB; nicotinate dehydrogenase subunit B [EC:1.17.2.1]
K14974	Akenti_specific	Seawater_specific	Akenti_specific	6	76	0	119	inf	0.00412225	0.0143747	6	nicC; 6-hydroxynicotinate 3-monooxygenase [EC:1.14.13.114]
K06191	Akenti_specific	Seawater_specific	Akenti_specific	6	76	0	119	inf	0.00412225	0.0143747	6	nrdH; glutaredoxin-like protein NrdH
K15579	Akenti_specific	Seawater_specific	Akenti_specific	6	76	0	119	inf	0.00412225	0.0143747	6	nrtD, cynD; nitrate/nitrite transport system ATP-binding protein
K19585	Akenti_specific	Seawater_specific	Akenti_specific	6	76	0	119	inf	0.00412225	0.0143747	6	oqxB; multidrug efflux pump
K02624	Akenti_specific	Seawater_specific	Akenti_specific	15	67	6	113	4.21642	0.00402144	0.0143747	9	pcaR; IclR family transcriptional regulator, pca regulon regulatory protein
K03391	Akenti_specific	Seawater_specific	Akenti_specific	6	76	0	119	inf	0.00412225	0.0143747	6	pcpB; pentachlorophenol monooxygenase [EC:1.14.13.50]
K21006	Akenti_specific	Seawater_specific	Akenti_specific	6	76	0	119	inf	0.00412225	0.0143747	6	pelA; polysaccharide biosynthesis protein PelA
K21008	Akenti_specific	Seawater_specific	Akenti_specific	6	76	0	119	inf	0.00412225	0.0143747	6	pelC; polysaccharide biosynthesis protein PelC
K21010	Akenti_specific	Seawater_specific	Akenti_specific	6	76	0	119	inf	0.00412225	0.0143747	6	pelE; polysaccharide biosynthesis protein PelE
K21011	Akenti_specific	Seawater_specific	Akenti_specific	6	76	0	119	inf	0.00412225	0.0143747	6	pelF; polysaccharide biosynthesis protein PelF
K21012	Akenti_specific	Seawater_specific	Akenti_specific	6	76	0	119	inf	0.00412225	0.0143747	6	pelG; polysaccharide biosynthesis protein PelG
K20370	Akenti_specific	Seawater_specific	Akenti_specific	6	76	0	119	inf	0.00412225	0.0143747	6	PEPCK; phosphoenolpyruvate carboxykinase (diphosphate) [EC:4.1.1.38]
K16370	Akenti_specific	Seawater_specific	Akenti_specific	6	76	0	119	inf	0.00412225	0.0143747	6	pfkB; 6-phosphofructokinase 2 [EC:2.7.1.11]
K04750	Akenti_specific	Seawater_specific	Akenti_specific	11	71	3	116	5.99061	0.00399209	0.0143747	8	phnB; PhnB protein
K07215	Akenti_specific	Seawater_specific	Akenti_specific	6	76	0	119	inf	0.00412225	0.0143747	6	pigA, hemO; heme oxygenase (biliverdin-IX-beta and delta-forming) [EC:1.14.99.58]
K02487	Akenti_specific	Seawater_specific	Akenti_specific	6	76	0	119	inf	0.00412225	0.0143747	6	pilL; type IV pili sensor histidine kinase and response regulator
K14335	Akenti_specific	Seawater_specific	Akenti_specific	11	71	3	116	5.99061	0.00399209	0.0143747	8	pimC; alpha-1,6-mannosyltransferase [EC:2.4.1.-]
K07716	Akenti_specific	Seawater_specific	Akenti_specific	6	76	0	119	inf	0.00412225	0.0143747	6	pleC; two-component system, cell cycle sensor histidine kinase PleC [EC:2.7.13.3]
K07392	Akenti_specific	Seawater_specific	Akenti_specific	6	76	0	119	inf	0.00412225	0.0143747	6	PRS2; AAA family ATPase
K07533	Akenti_specific	Seawater_specific	Akenti_specific	6	76	0	119	inf	0.00412225	0.0143747	6	prsA; foldase protein PrsA [EC:5.2.1.8]
K02759	Akenti_specific	Seawater_specific	Akenti_specific	6	76	0	119	inf	0.00412225	0.0143747	6	PTS-Cel-EIIA, celC, chbA; PTS system, cellobiose-specific IIA component [EC:2.7.1.196 2.7.1.205]
K02821	Akenti_specific	Seawater_specific	Akenti_specific	6	76	0	119	inf	0.00412225	0.0143747	6	PTS-Ula-EIIA, ulaC, sgaA; PTS system, ascorbate-specific IIA component [EC:2.7.1.194]
K03475	Akenti_specific	Seawater_specific	Akenti_specific	6	76	0	119	inf	0.00412225	0.0143747	6	PTS-Ula-EIIC, ulaA, sgaT; PTS system, ascorbate-specific IIC component
K11161	Akenti_specific	Seawater_specific	Akenti_specific	6	76	0	119	inf	0.00412225	0.0143747	6	RDH13; retinol dehydrogenase 13 [EC:1.1.1.300]
K18918	Akenti_specific	Seawater_specific	Akenti_specific	6	76	0	119	inf	0.00412225	0.0143747	6	relB; RHH-type transcriptional regulator, rel operon repressor / antitoxin RelB
K20972	Akenti_specific	Seawater_specific	Akenti_specific	6	76	0	119	inf	0.00412225	0.0143747	6	retS; two-component system, sensor histidine kinase RetS
K21022	Akenti_specific	Seawater_specific	Akenti_specific	6	76	0	119	inf	0.00412225	0.0143747	6	roeA; diguanylate cyclase [EC:2.7.7.65]
K18444	Akenti_specific	Seawater_specific	Akenti_specific	6	76	0	119	inf	0.00412225	0.0143747	6	rrp1; two-component system, glycerol uptake and utilization response regulator
K01974	Akenti_specific	Seawater_specific	Akenti_specific	6	76	0	119	inf	0.00412225	0.0143747	6	RTCA, rtcA; RNA 3'-terminal phosphate cyclase (ATP) [EC:6.5.1.4]
K14347	Akenti_specific	Seawater_specific	Akenti_specific	6	76	0	119	inf	0.00412225	0.0143747	6	SLC10A7, P7; solute carrier family 10 (sodium/bile acid cotransporter), member 7
K13639	Akenti_specific	Seawater_specific	Akenti_specific	10	72	2	117	8.125	0.00404244	0.0143747	8	soxR; MerR family transcriptional regulator, redox-sensitive transcriptional activator SoxR
K05877	Akenti_specific	Seawater_specific	Akenti_specific	6	76	0	119	inf	0.00412225	0.0143747	6	tap; methyl-accepting chemotaxis protein IV, peptide sensor receptor
K03173	Akenti_specific	Seawater_specific	Akenti_specific	6	76	0	119	inf	0.00412225	0.0143747	6	TRAF2; TNF receptor-associated factor 2 [EC:2.3.2.27]
K13498	Akenti_specific	Seawater_specific	Akenti_specific	6	76	0	119	inf	0.00412225	0.0143747	6	trpCF; indole-3-glycerol phosphate synthase / phosphoribosylanthranilate isomerase [EC:4.1.1.48 5.3.1.24]
K08358	Akenti_specific	Seawater_specific	Akenti_specific	10	72	2	117	8.125	0.00404244	0.0143747	8	ttrB; tetrathionate reductase subunit B
K14187	Akenti_specific	Seawater_specific	Akenti_specific	6	76	0	119	inf	0.00412225	0.0143747	6	tyrA; chorismate mutase / prephenate dehydrogenase [EC:5.4.99.5 1.3.1.12]
K03078	Akenti_specific	Seawater_specific	Akenti_specific	6	76	0	119	inf	0.00412225	0.0143747	6	ulaD, sgaH, sgbH; 3-dehydro-L-gulonate-6-phosphate decarboxylase [EC:4.1.1.85]
K14061	Akenti_specific	Seawater_specific	Akenti_specific	6	76	0	119	inf	0.00412225	0.0143747	6	uspF; universal stress protein F
K11909	Akenti_specific	Seawater_specific	Akenti_specific	6	76	0	119	inf	0.00412225	0.0143747	6	vasI; type VI secretion system protein VasI
K07668	Akenti_specific	Seawater_specific	Akenti_specific	10	72	2	117	8.125	0.00404244	0.0143747	8	vicR; two-component system, OmpR family, response regulator VicR
K20920	Akenti_specific	Seawater_specific	Akenti_specific	6	76	0	119	inf	0.00412225	0.0143747	6	vpsM; polysaccharide biosynthesis protein VpsM
K07458	Akenti_specific	Seawater_specific	Akenti_specific	10	72	2	117	8.125	0.00404244	0.0143747	8	vsr; DNA mismatch endonuclease, patch repair protein [EC:3.1.-.-]
K13016	Akenti_specific	Seawater_specific	Akenti_specific	11	71	3	116	5.99061	0.00399209	0.0143747	8	wbpB; UDP-N-acetyl-2-amino-2-deoxyglucuronate dehydrogenase [EC:1.1.1.335]
K15495	Akenti_specific	Seawater_specific	Akenti_specific	6	76	0	119	inf	0.00412225	0.0143747	6	wtpA; molybdate/tungstate transport system substrate-binding protein
K13483	Akenti_specific	Seawater_specific	Akenti_specific	6	76	0	119	inf	0.00412225	0.0143747	6	yagT; xanthine dehydrogenase YagT iron-sulfur-binding subunit
K03931	Akenti_specific	Seawater_specific	Akenti_specific	6	76	0	119	inf	0.00412225	0.0143747	6	ygjK; putative isomerase
K07229	Akenti_specific	Seawater_specific	Akenti_specific	6	76	0	119	inf	0.00412225	0.0143747	6	yqjH; ferric-chelate reductase (NADPH) [EC:1.16.1.9]
K10954	Akenti_specific	Seawater_specific	Akenti_specific	6	76	0	119	inf	0.00412225	0.0143747	6	zot; zona occludens toxin
K03392	Akenti_specific	Seawater_specific	Seawater_specific	8	74	31	88	0.306888	0.00382461	0.0143494	-23	ACMSD; aminocarboxymuconate-semialdehyde decarboxylase [EC:4.1.1.45]
K03824	Akenti_specific	Seawater_specific	Akenti_specific	28	54	19	100	2.72904	0.00378294	0.0142018	9	yhbS; putative acetyltransferase [EC:2.3.1.-]
K14534	Akenti_specific	Seawater_specific	Akenti_specific	8	74	1	118	12.7568	0.00368486	0.0138421	7	abfD; 4-hydroxybutyryl-CoA dehydratase / vinylacetyl-CoA-Delta-isomerase [EC:4.2.1.120 5.3.3.3]
K10918	Akenti_specific	Seawater_specific	Akenti_specific	8	74	1	118	12.7568	0.00368486	0.0138421	7	aphB; LysR family transcriptional regulator, transcriptional activator AphB
K06900	Akenti_specific	Seawater_specific	Akenti_specific	8	74	1	118	12.7568	0.00368486	0.0138421	7	K06900; uncharacterized protein
K07488	Akenti_specific	Seawater_specific	Akenti_specific	8	74	1	118	12.7568	0.00368486	0.0138421	7	K07488; transposase
K13653	Akenti_specific	Seawater_specific	Akenti_specific	8	74	1	118	12.7568	0.00368486	0.0138421	7	K13653; AraC family transcriptional regulator
K19610	Akenti_specific	Seawater_specific	Akenti_specific	8	74	1	118	12.7568	0.00368486	0.0138421	7	pfeR, pirR; two-component system, OmpR family, response regulator PfeR
K18954	Akenti_specific	Seawater_specific	Akenti_specific	8	74	1	118	12.7568	0.00368486	0.0138421	7	pobR; AraC family transcriptional regulator, transcriptional activator of pobA
K01709	Akenti_specific	Seawater_specific	Akenti_specific	8	74	1	118	12.7568	0.00368486	0.0138421	7	rfbG; CDP-glucose 4,6-dehydratase [EC:4.2.1.45]
K03471	Akenti_specific	Seawater_specific	Akenti_specific	8	74	1	118	12.7568	0.00368486	0.0138421	7	rnhC; ribonuclease HIII [EC:3.1.26.4]
K03457	Akenti_specific	Seawater_specific	Akenti_specific	8	74	1	118	12.7568	0.00368486	0.0138421	7	TC.NCS1; nucleobase:cation symporter-1, NCS1 family
K13015	Akenti_specific	Seawater_specific	Akenti_specific	8	74	1	118	12.7568	0.00368486	0.0138421	7	wbpA; UDP-N-acetyl-D-glucosamine dehydrogenase [EC:1.1.1.136]
K07474	Akenti_specific	Seawater_specific	Akenti_specific	8	74	1	118	12.7568	0.00368486	0.0138421	7	xtmA; phage terminase small subunit
K00997	Akenti_specific	Seawater_specific	Akenti_specific	44	38	39	80	2.37517	0.00364098	0.0137816	5	acpS; holo-[acyl-carrier protein] synthase [EC:2.7.8.7]
K02193	Akenti_specific	Seawater_specific	Akenti_specific	46	36	41	78	2.43089	0.00364154	0.0137816	5	ccmA; heme exporter protein A [EC:3.6.3.41]
K03270	Akenti_specific	Seawater_specific	Akenti_specific	46	36	41	78	2.43089	0.00364154	0.0137816	5	kdsC; 3-deoxy-D-manno-octulosonate 8-phosphate phosphatase (KDO 8-P phosphatase) [EC:3.1.3.45]
K08967	Akenti_specific	Seawater_specific	Seawater_specific	6	76	27	92	0.269006	0.00361491	0.0137064	-21	mtnD, mtnZ, ADI1; 1,2-dihydroxy-3-keto-5-methylthiopentene dioxygenase [EC:1.13.11.53 1.13.11.54]
K02836	Akenti_specific	Seawater_specific	Akenti_specific	76	6	92	27	3.71739	0.00361491	0.0137064	-16	prfB; peptide chain release factor 2
K02968	Akenti_specific	Seawater_specific	Akenti_specific	76	6	92	27	3.71739	0.00361491	0.0137064	-16	RP-S20, rpsT; small subunit ribosomal protein S20
K11991	Akenti_specific	Seawater_specific	Akenti_specific	76	6	92	27	3.71739	0.00361491	0.0137064	-16	tadA; tRNA(adenine34) deaminase [EC:3.5.4.33]
K02031	Akenti_specific	Seawater_specific	Akenti_specific	45	37	40	79	2.40203	0.00359848	0.0136783	5	ABC.PE.A; peptide/nickel transport system ATP-binding protein
K06167	Akenti_specific	Seawater_specific	Akenti_specific	45	37	40	79	2.40203	0.00359848	0.0136783	5	phnP; phosphoribosyl 1,2-cyclic phosphate phosphodiesterase [EC:3.1.4.55]
K01469	Akenti_specific	Seawater_specific	Seawater_specific	13	69	41	78	0.358431	0.0035926	0.013673	-28	OPLAH, OXP1, oplAH; 5-oxoprolinase (ATP-hydrolysing) [EC:3.5.2.9]
K09949	Akenti_specific	Seawater_specific	Akenti_specific	27	55	18	101	2.75455	0.00351664	0.0133923	9	K09949; uncharacterized protein
K11751	Akenti_specific	Seawater_specific	Akenti_specific	27	55	18	101	2.75455	0.00351664	0.0133923	9	ushA; 5'-nucleotidase / UDP-sugar diphosphatase [EC:3.1.3.5 3.6.1.45]
K06971	Akenti_specific	Seawater_specific	Seawater_specific	3	79	20	99	0.187975	0.00334524	0.0127556	-17	K06971; uncharacterized protein
K11538	Akenti_specific	Seawater_specific	Akenti_specific	13	69	4	115	5.41667	0.00329442	0.0125697	9	ACAD8; isobutyryl-CoA dehydrogenase [EC:1.3.99.-]
K06202	Akenti_specific	Seawater_specific	Akenti_specific	13	69	4	115	5.41667	0.00329442	0.0125697	9	cyaY; CyaY protein
K05780	Akenti_specific	Seawater_specific	Akenti_specific	13	69	4	115	5.41667	0.00329442	0.0125697	9	phnL; alpha-D-ribose 1-methylphosphonate 5-triphosphate synthase subunit PhnL [EC:2.7.8.37]
K00635	Akenti_specific	Seawater_specific	Akenti_specific	13	69	4	115	5.41667	0.00329442	0.0125697	9	tgs, wax-dgat; diacylglycerol O-acyltransferase / wax synthase [EC:2.3.1.20 2.3.1.75]
K09780	Akenti_specific	Seawater_specific	Akenti_specific	42	40	36	83	2.42083	0.00326708	0.0124967	6	K09780; uncharacterized protein
K01372	Akenti_specific	Seawater_specific	Seawater_specific	3	79	21	98	0.177215	0.0032455	0.012422	-18	BLMH, pepC; bleomycin hydrolase [EC:3.4.22.40]
K00942	Akenti_specific	Seawater_specific	Akenti_specific	79	3	98	21	5.64286	0.0032455	0.012422	-19	E2.7.4.8, gmk; guanylate kinase [EC:2.7.4.8]
K06994	Akenti_specific	Seawater_specific	Seawater_specific	3	79	21	98	0.177215	0.0032455	0.012422	-18	K06994; putative drug exporter of the RND superfamily
K00004	Akenti_specific	Seawater_specific	Seawater_specific	0	82	11	108	0	0.0032246	0.0123654	-11	BDH, butB; (R,R)-butanediol dehydrogenase / meso-butanediol dehydrogenase / diacetyl reductase [EC:1.1.1.4 1.1.1.- 1.1.1.303]
K10834	Akenti_specific	Seawater_specific	Akenti_specific	31	51	22	97	2.68004	0.00320713	0.0123654	9	E3.6.3.41; heme-transporting ATPase [EC:3.6.3.41]
K00146	Akenti_specific	Seawater_specific	Seawater_specific	0	82	11	108	0	0.0032246	0.0123654	-11	feaB; phenylacetaldehyde dehydrogenase [EC:1.2.1.39]
K03083	Akenti_specific	Seawater_specific	Seawater_specific	0	82	11	108	0	0.0032246	0.0123654	-11	GSK3B; glycogen synthase kinase 3 beta [EC:2.7.11.26]
K04109	Akenti_specific	Seawater_specific	Seawater_specific	0	82	11	108	0	0.0032246	0.0123654	-11	hcrB, hbaD; 4-hydroxybenzoyl-CoA reductase subunit beta [EC:1.3.7.9]
K18289	Akenti_specific	Seawater_specific	Seawater_specific	0	82	11	108	0	0.0032246	0.0123654	-11	ict-P; itaconate CoA-transferase [EC:2.8.3.- 2.8.3.22]
K04882	Akenti_specific	Seawater_specific	Seawater_specific	0	82	11	108	0	0.0032246	0.0123654	-11	KCNAB1; potassium voltage-gated channel Shaker-related subfamily A, beta member 1
K01265	Akenti_specific	Seawater_specific	Akenti_specific	82	0	108	11	inf	0.0032246	0.0123654	-26	map; methionyl aminopeptidase [EC:3.4.11.18]
K02691	Akenti_specific	Seawater_specific	Seawater_specific	0	82	11	108	0	0.0032246	0.0123654	-11	psaC; photosystem I subunit VII
K02707	Akenti_specific	Seawater_specific	Seawater_specific	0	82	11	108	0	0.0032246	0.0123654	-11	psbE; photosystem II cytochrome b559 subunit alpha
K02713	Akenti_specific	Seawater_specific	Seawater_specific	0	82	11	108	0	0.0032246	0.0123654	-11	psbL; photosystem II PsbL protein
K12990	Akenti_specific	Seawater_specific	Seawater_specific	0	82	11	108	0	0.0032246	0.0123654	-11	rfbF, rhlC; rhamnosyltransferase [EC:2.4.1.-]
K00768	Akenti_specific	Seawater_specific	Akenti_specific	35	47	27	92	2.53743	0.00316582	0.0122326	8	E2.4.2.21, cobU, cobT; nicotinate-nucleotide--dimethylbenzimidazole phosphoribosyltransferase [EC:2.4.2.21]
K02117	Akenti_specific	Seawater_specific	Akenti_specific	19	63	9	110	3.68607	0.00310632	0.0120103	10	ATPVA, ntpA, atpA; V/A-type H+/Na+-transporting ATPase subunit A [EC:7.1.2.2 7.2.2.1]
K02118	Akenti_specific	Seawater_specific	Akenti_specific	19	63	9	110	3.68607	0.00310632	0.0120103	10	ATPVB, ntpB, atpB; V/A-type H+/Na+-transporting ATPase subunit B
K02120	Akenti_specific	Seawater_specific	Akenti_specific	19	63	9	110	3.68607	0.00310632	0.0120103	10	ATPVD, ntpD, atpD; V/A-type H+/Na+-transporting ATPase subunit D
K06985	Akenti_specific	Seawater_specific	Akenti_specific	19	63	9	110	3.68607	0.00310632	0.0120103	10	K06985; aspartyl protease family protein
K14645	Akenti_specific	Seawater_specific	Akenti_specific	19	63	9	110	3.68607	0.00310632	0.0120103	10	K14645; serine protease [EC:3.4.21.-]
K19591	Akenti_specific	Seawater_specific	Akenti_specific	24	58	14	105	3.10345	0.00300723	0.0116688	10	cueR; MerR family transcriptional regulator, copper efflux regulator
K19421	Akenti_specific	Seawater_specific	Akenti_specific	30	52	21	98	2.69231	0.00300443	0.0116688	9	epsC; polysaccharide biosynthesis protein EpsC
K07093	Akenti_specific	Seawater_specific	Akenti_specific	24	58	14	105	3.10345	0.00300723	0.0116688	10	K07093; uncharacterized protein
K00943	Akenti_specific	Seawater_specific	Akenti_specific	70	12	79	40	2.95359	0.0030084	0.0116688	-9	tmk, DTYMK; dTMP kinase [EC:2.7.4.9]
K00496	Akenti_specific	Seawater_specific	Seawater_specific	15	67	45	74	0.368159	0.00298196	0.0115959	-30	alkB1_2, alkM; alkane 1-monooxygenase [EC:1.14.15.3]
K08994	Akenti_specific	Seawater_specific	Seawater_specific	4	78	23	96	0.214047	0.00293999	0.01144	-19	yneE, BEST; ion channel-forming bestrophin family protein
K00180	Akenti_specific	Seawater_specific	Akenti_specific	14	68	5	114	4.69412	0.00291504	0.0113502	9	iorB; indolepyruvate ferredoxin oxidoreductase, beta subunit [EC:1.2.7.8]
K06163	Akenti_specific	Seawater_specific	Akenti_specific	14	68	5	114	4.69412	0.00291504	0.0113502	9	phnJ; alpha-D-ribose 1-methylphosphonate 5-phosphate C-P lyase [EC:4.7.1.1]
K05781	Akenti_specific	Seawater_specific	Akenti_specific	14	68	5	114	4.69412	0.00291504	0.0113502	9	phnK; putative phosphonate transport system ATP-binding protein
K01812	Akenti_specific	Seawater_specific	Akenti_specific	14	68	5	114	4.69412	0.00291504	0.0113502	9	uxaC; glucuronate isomerase [EC:5.3.1.12]
K06194	Akenti_specific	Seawater_specific	Akenti_specific	41	41	34	85	2.5	0.00289356	0.0112955	7	nlpD; lipoprotein NlpD
K02488	Akenti_specific	Seawater_specific	Akenti_specific	21	61	11	108	3.38003	0.00285842	0.0111655	10	pleD; two-component system, cell cycle response regulator [EC:2.7.7.65]
K00322	Akenti_specific	Seawater_specific	Akenti_specific	21	61	11	108	3.38003	0.00285842	0.0111655	10	sthA, udhA; NAD(P) transhydrogenase [EC:1.6.1.1]
K16329	Akenti_specific	Seawater_specific	Seawater_specific	9	73	34	85	0.308219	0.00284296	0.0111194	-25	psuG; pseudouridylate synthase [EC:4.2.1.70]
K02294	Akenti_specific	Seawater_specific	Seawater_specific	7	75	30	89	0.276889	0.00283394	0.0110912	-23	crtR; beta-carotene hydroxylase [EC:1.14.13.-]
K02862	Akenti_specific	Seawater_specific	Seawater_specific	1	81	15	104	0.0855967	0.00274857	0.010764	-14	ctaG; putative membrane protein
K07120	Akenti_specific	Seawater_specific	Seawater_specific	11	71	38	81	0.330245	0.00263821	0.0103385	-27	K07120; uncharacterized protein
K02377	Akenti_specific	Seawater_specific	Akenti_specific	34	48	25	94	2.66333	0.00260181	0.0102024	9	TSTA3, fcl; GDP-L-fucose synthase [EC:1.1.1.271]
K09806	Akenti_specific	Seawater_specific	Akenti_specific	30	52	20	99	2.85577	0.00257487	0.0101033	10	K09806; uncharacterized protein
K09690	Akenti_specific	Seawater_specific	Akenti_specific	23	59	13	106	3.17862	0.00256058	0.0100537	10	ABC-2.LPSE.P; lipopolysaccharide transport system permease protein
K00965	Akenti_specific	Seawater_specific	Akenti_specific	23	59	13	106	3.17862	0.00256058	0.0100537	10	galT, GALT; UDPglucose--hexose-1-phosphate uridylyltransferase [EC:2.7.7.12]
K05801	Akenti_specific	Seawater_specific	Akenti_specific	52	30	49	70	2.47619	0.00252366	0.00992159	3	djlA; DnaJ like chaperone protein
K03742	Akenti_specific	Seawater_specific	Seawater_specific	30	52	70	49	0.403846	0.00252366	0.00992159	-40	pncC; nicotinamide-nucleotide amidase [EC:3.5.1.42]
K02313	Akenti_specific	Seawater_specific	Akenti_specific	77	5	93	26	4.30538	0.00251565	0.00990292	-16	dnaA; chromosomal replication initiator protein
K02067	Akenti_specific	Seawater_specific	Akenti_specific	53	29	50	69	2.52207	0.00247306	0.00974159	3	mlaD, linM; phospholipid/cholesterol/gamma-HCH transport system substrate-binding protein
K01512	Akenti_specific	Seawater_specific	Akenti_specific	39	43	31	88	2.57464	0.00247111	0.00974021	8	acyP; acylphosphatase [EC:3.6.1.7]
K01716	Akenti_specific	Seawater_specific	Akenti_specific	39	43	31	88	2.57464	0.00247111	0.00974021	8	fabA; 3-hydroxyacyl-[acyl-carrier protein] dehydratase / trans-2-decenoyl-[acyl-carrier protein] isomerase [EC:4.2.1.59 5.3.3.14]
K02168	Akenti_specific	Seawater_specific	Akenti_specific	33	49	24	95	2.66582	0.00245135	0.00967489	9	betT, betS; choline/glycine/proline betaine transport protein
K01533	Akenti_specific	Seawater_specific	Akenti_specific	38	44	30	89	2.56212	0.00238572	0.00942198	8	copB; Cu2+-exporting ATPase [EC:3.6.3.4]
K03651	Akenti_specific	Seawater_specific	Akenti_specific	38	44	30	89	2.56212	0.00238572	0.00942198	8	cpdA; 3',5'-cyclic-AMP phosphodiesterase [EC:3.1.4.53]
K21023	Akenti_specific	Seawater_specific	Akenti_specific	20	62	10	109	3.51613	0.0023606	0.00933491	10	mucR; diguanylate cyclase [EC:2.7.7.65]
K20455	Akenti_specific	Seawater_specific	Akenti_specific	18	64	8	111	3.90234	0.00234273	0.00927027	10	acnD; 2-methylcitrate dehydratase (2-methyl-trans-aconitate forming) [EC:4.2.1.117]
K02557	Akenti_specific	Seawater_specific	Akenti_specific	57	25	56	63	2.565	0.00229182	0.0090747	1	motB; chemotaxis protein MotB
K02113	Akenti_specific	Seawater_specific	Akenti_specific	76	6	91	28	3.89744	0.00223609	0.00885982	-15	ATPF1D, atpH; F-type H+-transporting ATPase subunit delta
K04039	Akenti_specific	Seawater_specific	Seawater_specific	6	76	28	91	0.256579	0.00223609	0.00885982	-22	chlB; light-independent protochlorophyllide reductase subunit B [EC:1.3.7.7]
K15918	Akenti_specific	Seawater_specific	Seawater_specific	6	76	28	91	0.256579	0.00223609	0.00885982	-22	GLYK; D-glycerate 3-kinase [EC:2.7.1.31]
K20447	Akenti_specific	Seawater_specific	Seawater_specific	6	76	28	91	0.256579	0.00223609	0.00885982	-22	ndhL; nicotinate dehydrogenase large molybdopterin subunit [EC:1.17.1.5]
K07478	Akenti_specific	Seawater_specific	Akenti_specific	65	17	69	50	2.77067	0.00220577	0.00876255	-4	ycaJ; putative ATPase
K00433	Akenti_specific	Seawater_specific	Seawater_specific	13	69	43	76	0.332996	0.00218328	0.00867887	-30	cpo; non-heme chloroperoxidase [EC:1.11.1.10]
K01704	Akenti_specific	Seawater_specific	Akenti_specific	69	13	76	43	3.00304	0.00218328	0.00867887	-7	leuD, IPMI-S; 3-isopropylmalate/(R)-2-methylmalate dehydratase small subunit [EC:4.2.1.33 4.2.1.35]
K00016	Akenti_specific	Seawater_specific	Akenti_specific	16	66	6	113	4.56566	0.00214625	0.00854283	10	LDH, ldh; L-lactate dehydrogenase [EC:1.1.1.27]
K00500	Akenti_specific	Seawater_specific	Akenti_specific	16	66	6	113	4.56566	0.00214625	0.00854283	10	phhA, PAH; phenylalanine-4-hydroxylase [EC:1.14.16.1]
K20035	Akenti_specific	Seawater_specific	Seawater_specific	10	72	37	82	0.307808	0.00211111	0.00841398	-27	dmdC; 3-(methylthio)propanoyl-CoA dehydrogenase [EC:1.3.8.-]
K00950	Akenti_specific	Seawater_specific	Akenti_specific	72	10	82	37	3.24878	0.00211111	0.00841398	-10	folK; 2-amino-4-hydroxy-6-hydroxymethyldihydropteridine diphosphokinase [EC:2.7.6.3]
K04765	Akenti_specific	Seawater_specific	Akenti_specific	37	45	28	91	2.67222	0.00202695	0.00810369	9	mazG; nucleoside triphosphate diphosphatase [EC:3.6.1.9]
K02066	Akenti_specific	Seawater_specific	Akenti_specific	66	16	71	48	2.78873	0.00202983	0.00810369	-5	mlaE, linK; phospholipid/cholesterol/gamma-HCH transport system permease protein
K07147	Akenti_specific	Seawater_specific	Akenti_specific	37	45	28	91	2.67222	0.00202695	0.00810369	9	msrP; methionine sulfoxide reductase catalytic subunit [EC:1.8.-.-]
K00797	Akenti_specific	Seawater_specific	Akenti_specific	44	38	37	82	2.56615	0.00203059	0.00810369	7	speE, SRM; spermidine synthase [EC:2.5.1.16]
K04085	Akenti_specific	Seawater_specific	Akenti_specific	44	38	37	82	2.56615	0.00203059	0.00810369	7	tusA, sirA; tRNA 2-thiouridine synthesizing protein A [EC:2.8.1.-]
K01802	Akenti_specific	Seawater_specific	Seawater_specific	40	42	84	35	0.396825	0.00202317	0.00810066	-44	E5.2.1.8; peptidylprolyl isomerase [EC:5.2.1.8]
K00219	Akenti_specific	Seawater_specific	Akenti_specific	43	39	36	83	2.54202	0.00200011	0.00801362	7	fadH; 2,4-dienoyl-CoA reductase (NADPH2) [EC:1.3.1.34]
K07712	Akenti_specific	Seawater_specific	Akenti_specific	43	39	36	83	2.54202	0.00200011	0.00801362	7	glnG, ntrC; two-component system, NtrC family, nitrogen regulation response regulator GlnG
K03271	Akenti_specific	Seawater_specific	Akenti_specific	43	39	36	83	2.54202	0.00200011	0.00801362	7	gmhA, lpcA; D-sedoheptulose 7-phosphate isomerase [EC:5.3.1.28]
K18122	Akenti_specific	Seawater_specific	Akenti_specific	11	71	2	117	9.06338	0.0019772	0.00793752	9	cat2, abfT; 4-hydroxybutyrate CoA-transferase [EC:2.8.3.-]
K07054	Akenti_specific	Seawater_specific	Akenti_specific	11	71	2	117	9.06338	0.0019772	0.00793752	9	K07054; uncharacterized protein
K13747	Akenti_specific	Seawater_specific	Akenti_specific	11	71	2	117	9.06338	0.0019772	0.00793752	9	nspC; carboxynorspermidine decarboxylase [EC:4.1.1.96]
K01408	Akenti_specific	Seawater_specific	Akenti_specific	12	70	3	116	6.62857	0.00191208	0.00769133	9	IDE, ide; insulysin [EC:3.4.24.56]
K02860	Akenti_specific	Seawater_specific	Akenti_specific	70	12	78	41	3.06624	0.00188243	0.00757709	-8	rimM; 16S rRNA processing protein RimM
K03189	Akenti_specific	Seawater_specific	Seawater_specific	12	70	41	78	0.326132	0.00188243	0.00757709	-29	ureG; urease accessory protein
K10805	Akenti_specific	Seawater_specific	Akenti_specific	35	47	26	93	2.66367	0.00186912	0.00753351	9	tesB; acyl-CoA thioesterase II [EC:3.1.2.-]
K19003	Akenti_specific	Seawater_specific	Seawater_specific	2	80	19	100	0.131579	0.00178194	0.00718771	-17	mgdA; 1,2-diacylglycerol 3-beta-glucosyltransferase [EC:2.4.1.336]
K18682	Akenti_specific	Seawater_specific	Akenti_specific	31	51	21	98	2.8366	0.00178215	0.00718771	10	rny; ribonucrease Y [EC:3.1.-.-]
K13896	Akenti_specific	Seawater_specific	Akenti_specific	31	51	21	98	2.8366	0.00178215	0.00718771	10	yejF; microcin C transport system ATP-binding protein
K02341	Akenti_specific	Seawater_specific	Akenti_specific	73	9	84	35	3.37963	0.001776	0.00717722	-11	holB; DNA polymerase III subunit delta' [EC:2.7.7.7]
K06883	Akenti_specific	Seawater_specific	Seawater_specific	9	73	35	84	0.29589	0.001776	0.00717722	-26	K06883; uncharacterized protein
K07393	Akenti_specific	Seawater_specific	Seawater_specific	15	67	47	72	0.342966	0.00176821	0.00715525	-32	ECM4, yqjG; glutathionyl-hydroquinone reductase [EC:1.8.5.7]
K01821	Akenti_specific	Seawater_specific	Akenti_specific	20	62	9	110	3.94265	0.00175821	0.00711951	11	praC, xylH; 4-oxalocrotonate tautomerase [EC:5.3.2.6]
K00981	Akenti_specific	Seawater_specific	Akenti_specific	78	4	95	24	4.92632	0.00175227	0.0071002	-17	E2.7.7.41, CDS1, CDS2, cdsA; phosphatidate cytidylyltransferase [EC:2.7.7.41]
K03795	Akenti_specific	Seawater_specific	Seawater_specific	9	73	36	83	0.284247	0.00172595	0.00701497	-27	cbiX; sirohydrochlorin cobaltochelatase [EC:4.99.1.3]
K19658	Akenti_specific	Seawater_specific	Seawater_specific	0	82	12	107	0	0.00173008	0.00701497	-12	ECH2; peroxisomal enoyl-CoA hydratase 2 [EC:4.2.1.119]
K00484	Akenti_specific	Seawater_specific	Seawater_specific	0	82	12	107	0	0.00173008	0.00701497	-12	hpaC; flavin reductase (NADH) [EC:1.5.1.36]
K07978	Akenti_specific	Seawater_specific	Seawater_specific	0	82	12	107	0	0.00173008	0.00701497	-12	plmA; GntR family transcriptional regulator
K16020	Akenti_specific	Seawater_specific	Seawater_specific	0	82	12	107	0	0.00173008	0.00701497	-12	rifG, asm47; 5-deoxy-5-amino-3-dehydroquinate synthase
K18958	Akenti_specific	Seawater_specific	Seawater_specific	0	82	12	107	0	0.00173008	0.00701497	-12	whiB7; WhiB family transcriptional regulator, redox-sensing transcriptional regulator
K06164	Akenti_specific	Seawater_specific	Akenti_specific	14	68	4	115	5.91912	0.0017018	0.00692801	10	phnI; alpha-D-ribose 1-methylphosphonate 5-triphosphate synthase subunit PhnI [EC:2.7.8.37]
K01784	Akenti_specific	Seawater_specific	Akenti_specific	71	11	80	39	3.14659	0.00167192	0.00681095	-9	galE, GALE; UDP-glucose 4-epimerase [EC:5.1.3.2]
K01934	Akenti_specific	Seawater_specific	Akenti_specific	71	11	80	39	3.14659	0.00167192	0.00681095	-9	MTHFS; 5-formyltetrahydrofolate cyclo-ligase [EC:6.3.3.2]
K10023	Akenti_specific	Seawater_specific	Akenti_specific	7	75	0	119	inf	0.00160662	0.00655372	7	aotM; arginine/ornithine transport system permease protein
K09997	Akenti_specific	Seawater_specific	Akenti_specific	7	75	0	119	inf	0.00160662	0.00655372	7	artI; arginine transport system substrate-binding protein
K10000	Akenti_specific	Seawater_specific	Akenti_specific	7	75	0	119	inf	0.00160662	0.00655372	7	artP; arginine transport system ATP-binding protein [EC:3.6.3.-]
K09999	Akenti_specific	Seawater_specific	Akenti_specific	7	75	0	119	inf	0.00160662	0.00655372	7	artQ; arginine transport system permease protein
K01914	Akenti_specific	Seawater_specific	Akenti_specific	7	75	0	119	inf	0.00160662	0.00655372	7	asnA; aspartate--ammonia ligase [EC:6.3.1.1]
K03383	Akenti_specific	Seawater_specific	Akenti_specific	7	75	0	119	inf	0.00160662	0.00655372	7	atzD; cyanuric acid amidohydrolase [EC:3.5.2.15]
K04034	Akenti_specific	Seawater_specific	Akenti_specific	7	75	0	119	inf	0.00160662	0.00655372	7	bchE; anaerobic magnesium-protoporphyrin IX monomethyl ester cyclase [EC:1.21.98.3]
K20542	Akenti_specific	Seawater_specific	Akenti_specific	7	75	0	119	inf	0.00160662	0.00655372	7	bcsZ; endoglucanase [EC:3.2.1.4]
K00197	Akenti_specific	Seawater_specific	Akenti_specific	7	75	0	119	inf	0.00160662	0.00655372	7	cdhE, acsC; acetyl-CoA decarbonylase/synthase complex subunit gamma [EC:2.1.1.245]
K16431	Akenti_specific	Seawater_specific	Akenti_specific	7	75	0	119	inf	0.00160662	0.00655372	7	cepH, sgcC3, mdpC3, kedY3; FAD-dependent halogenase [EC:1.14.19.-]
K03410	Akenti_specific	Seawater_specific	Akenti_specific	7	75	0	119	inf	0.00160662	0.00655372	7	cheC; chemotaxis protein CheC
K10622	Akenti_specific	Seawater_specific	Akenti_specific	7	75	0	119	inf	0.00160662	0.00655372	7	cmtD, dhbB; HCOMODA/2-hydroxy-3-carboxy-muconic semialdehyde decarboxylase [EC:4.1.1.-]
K18367	Akenti_specific	Seawater_specific	Akenti_specific	7	75	0	119	inf	0.00160662	0.00655372	7	CoADR; CoA-dependent NAD(P)H sulfur oxidoreductase [EC:1.8.1.18]
K13589	Akenti_specific	Seawater_specific	Akenti_specific	7	75	0	119	inf	0.00160662	0.00655372	7	cpdR; two-component system, cell cycle response regulator CpdR
K09159	Akenti_specific	Seawater_specific	Akenti_specific	35	47	25	94	2.8	0.00158286	0.00655372	10	cptB; antitoxin CptB
K20038	Akenti_specific	Seawater_specific	Akenti_specific	7	75	0	119	inf	0.00160662	0.00655372	7	cutC; choline trimethylamine-lyase [EC:4.3.99.4]
K15725	Akenti_specific	Seawater_specific	Akenti_specific	7	75	0	119	inf	0.00160662	0.00655372	7	czcC; outer membrane protein, cobalt-zinc-cadmium efflux system
K07778	Akenti_specific	Seawater_specific	Akenti_specific	7	75	0	119	inf	0.00160662	0.00655372	7	desK; two-component system, NarL family, sensor histidine kinase DesK [EC:2.7.13.3]
K16246	Akenti_specific	Seawater_specific	Akenti_specific	7	75	0	119	inf	0.00160662	0.00655372	7	dmpP, poxF; phenol hydroxylase P5 protein
K03805	Akenti_specific	Seawater_specific	Akenti_specific	7	75	0	119	inf	0.00160662	0.00655372	7	dsbG; thiol:disulfide interchange protein DsbG
K00158	Akenti_specific	Seawater_specific	Akenti_specific	7	75	0	119	inf	0.00160662	0.00655372	7	E1.2.3.3, poxL; pyruvate oxidase [EC:1.2.3.3]
K00590	Akenti_specific	Seawater_specific	Akenti_specific	7	75	0	119	inf	0.00160662	0.00655372	7	E2.1.1.113; site-specific DNA-methyltransferase (cytosine-N4-specific) [EC:2.1.1.113]
K08252	Akenti_specific	Seawater_specific	Akenti_specific	7	75	0	119	inf	0.00160662	0.00655372	7	E2.7.10.1; receptor protein-tyrosine kinase [EC:2.7.10.1]
K01502	Akenti_specific	Seawater_specific	Akenti_specific	7	75	0	119	inf	0.00160662	0.00655372	7	E3.5.5.7; aliphatic nitrilase [EC:3.5.5.7]
K06718	Akenti_specific	Seawater_specific	Akenti_specific	7	75	0	119	inf	0.00160662	0.00655372	7	ectA; L-2,4-diaminobutyric acid acetyltransferase [EC:2.3.1.178]
K19425	Akenti_specific	Seawater_specific	Akenti_specific	7	75	0	119	inf	0.00160662	0.00655372	7	epsH; glycosyltransferase EpsH [EC:2.4.-.-]
K04024	Akenti_specific	Seawater_specific	Akenti_specific	7	75	0	119	inf	0.00160662	0.00655372	7	eutJ; ethanolamine utilization protein EutJ
K00126	Akenti_specific	Seawater_specific	Akenti_specific	7	75	0	119	inf	0.00160662	0.00655372	7	fdsD; formate dehydrogenase subunit delta [EC:1.17.1.9]
K20679	Akenti_specific	Seawater_specific	Akenti_specific	7	75	0	119	inf	0.00160662	0.00655372	7	fdtA; TDP-4-oxo-6-deoxy-alpha-D-glucose-3,4-oxoisomerase [EC:5.3.2.3]
K15125	Akenti_specific	Seawater_specific	Akenti_specific	7	75	0	119	inf	0.00160662	0.00655372	7	fhaB; filamentous hemagglutinin
K02399	Akenti_specific	Seawater_specific	Akenti_specific	7	75	0	119	inf	0.00160662	0.00655372	7	flgN; flagella synthesis protein FlgN
K08223	Akenti_specific	Seawater_specific	Akenti_specific	7	75	0	119	inf	0.00160662	0.00655372	7	fsr; MFS transporter, FSR family, fosmidomycin resistance protein
K11261	Akenti_specific	Seawater_specific	Akenti_specific	7	75	0	119	inf	0.00160662	0.00655372	7	fwdE, fmdE; formylmethanofuran dehydrogenase subunit E [EC:1.2.7.12]
K11933	Akenti_specific	Seawater_specific	Akenti_specific	7	75	0	119	inf	0.00160662	0.00655372	7	hcr; NADH oxidoreductase Hcr [EC:1.-.-.-]
K18831	Akenti_specific	Seawater_specific	Akenti_specific	7	75	0	119	inf	0.00160662	0.00655372	7	higA; HTH-type transcriptional regulator / antitoxin HigA
K11891	Akenti_specific	Seawater_specific	Akenti_specific	7	75	0	119	inf	0.00160662	0.00655372	7	impL, vasK, icmF; type VI secretion system protein ImpL
K14059	Akenti_specific	Seawater_specific	Akenti_specific	7	75	0	119	inf	0.00160662	0.00655372	7	int; integrase
K01163	Akenti_specific	Seawater_specific	Akenti_specific	7	75	0	119	inf	0.00160662	0.00655372	7	K01163; uncharacterized protein
K06904	Akenti_specific	Seawater_specific	Akenti_specific	7	75	0	119	inf	0.00160662	0.00655372	7	K06904; uncharacterized protein
K06951	Akenti_specific	Seawater_specific	Akenti_specific	7	75	0	119	inf	0.00160662	0.00655372	7	K06951; uncharacterized protein
K07077	Akenti_specific	Seawater_specific	Akenti_specific	7	75	0	119	inf	0.00160662	0.00655372	7	K07077; uncharacterized protein
K07096	Akenti_specific	Seawater_specific	Akenti_specific	9	73	1	118	14.5479	0.00156657	0.00655372	8	K07096; uncharacterized protein
K07318	Akenti_specific	Seawater_specific	Akenti_specific	7	75	0	119	inf	0.00160662	0.00655372	7	K07318; adenine-specific DNA-methyltransferase [EC:2.1.1.72]
K07494	Akenti_specific	Seawater_specific	Akenti_specific	7	75	0	119	inf	0.00160662	0.00655372	7	K07494; putative transposase
K09122	Akenti_specific	Seawater_specific	Akenti_specific	7	75	0	119	inf	0.00160662	0.00655372	7	K09122; uncharacterized protein
K09137	Akenti_specific	Seawater_specific	Akenti_specific	7	75	0	119	inf	0.00160662	0.00655372	7	K09137; uncharacterized protein
K09157	Akenti_specific	Seawater_specific	Akenti_specific	7	75	0	119	inf	0.00160662	0.00655372	7	K09157; uncharacterized protein
K09747	Akenti_specific	Seawater_specific	Akenti_specific	68	14	74	45	2.95367	0.00159093	0.00655372	-6	K09747; uncharacterized protein
K09777	Akenti_specific	Seawater_specific	Akenti_specific	7	75	0	119	inf	0.00160662	0.00655372	7	K09777; uncharacterized protein
K09924	Akenti_specific	Seawater_specific	Akenti_specific	9	73	1	118	14.5479	0.00156657	0.00655372	8	K09924; uncharacterized protein
K09958	Akenti_specific	Seawater_specific	Akenti_specific	7	75	0	119	inf	0.00160662	0.00655372	7	K09958; uncharacterized protein
K09974	Akenti_specific	Seawater_specific	Akenti_specific	7	75	0	119	inf	0.00160662	0.00655372	7	K09974; uncharacterized protein
K16637	Akenti_specific	Seawater_specific	Akenti_specific	7	75	0	119	inf	0.00160662	0.00655372	7	K16637, exoY; adenylate cyclase ExoY
K03778	Akenti_specific	Seawater_specific	Akenti_specific	9	73	1	118	14.5479	0.00156657	0.00655372	8	ldhA; D-lactate dehydrogenase [EC:1.1.1.28]
K10219	Akenti_specific	Seawater_specific	Seawater_specific	1	81	16	103	0.0794753	0.00152319	0.00655372	-15	ligC; 2-hydroxy-4-carboxymuconate semialdehyde hemiacetal dehydrogenase [EC:1.1.1.312]
K01971	Akenti_specific	Seawater_specific	Akenti_specific	7	75	0	119	inf	0.00160662	0.00655372	7	ligD; bifunctional non-homologous end joining protein LigD [EC:6.5.1.1]
K18480	Akenti_specific	Seawater_specific	Akenti_specific	7	75	0	119	inf	0.00160662	0.00655372	7	linN; cholesterol transport system auxiliary component
K08321	Akenti_specific	Seawater_specific	Akenti_specific	7	75	0	119	inf	0.00160662	0.00655372	7	lsrF; 3-hydroxy-5-phosphonooxypentane-2,4-dione thiolase [EC:2.3.1.245]
K01620	Akenti_specific	Seawater_specific	Seawater_specific	28	54	68	51	0.388889	0.00157542	0.00655372	-40	ltaE; threonine aldolase [EC:4.1.2.48]
K13888	Akenti_specific	Seawater_specific	Akenti_specific	7	75	0	119	inf	0.00160662	0.00655372	7	macA; membrane fusion protein, macrolide-specific efflux system
K05685	Akenti_specific	Seawater_specific	Akenti_specific	7	75	0	119	inf	0.00160662	0.00655372	7	macB; macrolide transport system ATP-binding/permease protein [EC:3.6.3.-]
K03670	Akenti_specific	Seawater_specific	Akenti_specific	7	75	0	119	inf	0.00160662	0.00655372	7	mdoG; periplasmic glucans biosynthesis protein
K19058	Akenti_specific	Seawater_specific	Akenti_specific	7	75	0	119	inf	0.00160662	0.00655372	7	merC; mercuric ion transport protein
K08363	Akenti_specific	Seawater_specific	Akenti_specific	7	75	0	119	inf	0.00160662	0.00655372	7	merT; mercuric ion transport protein
K18298	Akenti_specific	Seawater_specific	Akenti_specific	7	75	0	119	inf	0.00160662	0.00655372	7	mexE; membrane fusion protein, multidrug efflux system
K07469	Akenti_specific	Seawater_specific	Akenti_specific	7	75	0	119	inf	0.00160662	0.00655372	7	mop; aldehyde oxidoreductase [EC:1.2.99.7]
K03835	Akenti_specific	Seawater_specific	Akenti_specific	7	75	0	119	inf	0.00160662	0.00655372	7	mtr; tryptophan-specific transport protein
K14127	Akenti_specific	Seawater_specific	Akenti_specific	7	75	0	119	inf	0.00160662	0.00655372	7	mvhD, vhuD, vhcD; F420-non-reducing hydrogenase iron-sulfur subunit [EC:1.12.99.- 1.8.98.5 1.8.98.6]
K00371	Akenti_specific	Seawater_specific	Akenti_specific	7	75	0	119	inf	0.00160662	0.00655372	7	narH, narY, nxrB; nitrate reductase / nitrite oxidoreductase, beta subunit [EC:1.7.5.1 1.7.99.-]
K00373	Akenti_specific	Seawater_specific	Akenti_specific	7	75	0	119	inf	0.00160662	0.00655372	7	narJ, narW; nitrate reductase molybdenum cofactor assembly chaperone NarJ/NarW
K03885	Akenti_specific	Seawater_specific	Akenti_specific	35	47	25	94	2.8	0.00158286	0.00655372	10	ndh; NADH dehydrogenase [EC:1.6.99.3]
K05579	Akenti_specific	Seawater_specific	Seawater_specific	1	81	16	103	0.0794753	0.00152319	0.00655372	-15	ndhH; NAD(P)H-quinone oxidoreductase subunit H [EC:7.1.1.2]
K02589	Akenti_specific	Seawater_specific	Akenti_specific	7	75	0	119	inf	0.00160662	0.00655372	7	nifHD1, nifI1; nitrogen regulatory protein PII 1
K02590	Akenti_specific	Seawater_specific	Akenti_specific	7	75	0	119	inf	0.00160662	0.00655372	7	nifHD2, nifI2; nitrogen regulatory protein PII 2
K19586	Akenti_specific	Seawater_specific	Akenti_specific	7	75	0	119	inf	0.00160662	0.00655372	7	oqxA; membrane fusion protein, multidrug efflux system
K15866	Akenti_specific	Seawater_specific	Seawater_specific	28	54	68	51	0.388889	0.00157542	0.00655372	-40	paaG; 2-(1,2-epoxy-1,2-dihydrophenyl)acetyl-CoA isomerase [EC:5.3.3.18]
K04782	Akenti_specific	Seawater_specific	Akenti_specific	7	75	0	119	inf	0.00160662	0.00655372	7	pchB; isochorismate pyruvate lyase [EC:4.2.99.21]
K15914	Akenti_specific	Seawater_specific	Akenti_specific	7	75	0	119	inf	0.00160662	0.00655372	7	pglA; N,N'-diacetylbacillosaminyl-diphospho-undecaprenol alpha-1,3-N-acetylgalactosaminyltransferase [EC:2.4.1.290]
K02661	Akenti_specific	Seawater_specific	Akenti_specific	7	75	0	119	inf	0.00160662	0.00655372	7	pilK; type IV pilus assembly protein PilK
K02760	Akenti_specific	Seawater_specific	Akenti_specific	7	75	0	119	inf	0.00160662	0.00655372	7	PTS-Cel-EIIB, celA, chbB; PTS system, cellobiose-specific IIB component [EC:2.7.1.196 2.7.1.205]
K02768	Akenti_specific	Seawater_specific	Akenti_specific	7	75	0	119	inf	0.00160662	0.00655372	7	PTS-Fru-EIIA, fruB; PTS system, fructose-specific IIA component [EC:2.7.1.202]
K00839	Akenti_specific	Seawater_specific	Akenti_specific	7	75	0	119	inf	0.00160662	0.00655372	7	pucG; (S)-ureidoglycine---glyoxylate transaminase [EC:2.6.1.112]
K20329	Akenti_specific	Seawater_specific	Akenti_specific	7	75	0	119	inf	0.00160662	0.00655372	7	qsmR; IclR family transcriptional regulator, positive regulator for flagellar biogenesis
K06726	Akenti_specific	Seawater_specific	Akenti_specific	7	75	0	119	inf	0.00160662	0.00655372	7	rbsD; D-ribose pyranase [EC:5.4.99.62]
K00875	Akenti_specific	Seawater_specific	Akenti_specific	7	75	0	119	inf	0.00160662	0.00655372	7	rbtK; D-ribulokinase [EC:2.7.1.47]
K07505	Akenti_specific	Seawater_specific	Akenti_specific	7	75	0	119	inf	0.00160662	0.00655372	7	repA; regulatory protein RepA
K06140	Akenti_specific	Seawater_specific	Akenti_specific	7	75	0	119	inf	0.00160662	0.00655372	7	rnk; regulator of nucleoside diphosphate kinase
K06714	Akenti_specific	Seawater_specific	Akenti_specific	7	75	0	119	inf	0.00160662	0.00655372	7	rocR; arginine utilization regulatory protein
K15734	Akenti_specific	Seawater_specific	Akenti_specific	7	75	0	119	inf	0.00160662	0.00655372	7	SDR16C5; all-trans-retinol dehydrogenase (NAD+) [EC:1.1.1.105]
K02742	Akenti_specific	Seawater_specific	Akenti_specific	9	73	1	118	14.5479	0.00156657	0.00655372	8	sprT; SprT protein
K12685	Akenti_specific	Seawater_specific	Akenti_specific	7	75	0	119	inf	0.00160662	0.00655372	7	ssp; subtilase-type serine protease [EC:3.4.21.-]
K03319	Akenti_specific	Seawater_specific	Akenti_specific	9	73	1	118	14.5479	0.00156657	0.00655372	8	TC.DASS; divalent anion:Na+ symporter, DASS family
K12071	Akenti_specific	Seawater_specific	Akenti_specific	7	75	0	119	inf	0.00160662	0.00655372	7	traD; conjugal transfer pilus assembly protein TraD
K03720	Akenti_specific	Seawater_specific	Akenti_specific	7	75	0	119	inf	0.00160662	0.00655372	7	trpR; TrpR family transcriptional regulator, trp operon repressor
K01429	Akenti_specific	Seawater_specific	Seawater_specific	11	71	40	79	0.305986	0.00156672	0.00655372	-29	ureB; urease subunit beta [EC:3.5.1.5]
K15497	Akenti_specific	Seawater_specific	Akenti_specific	7	75	0	119	inf	0.00160662	0.00655372	7	wtpC; molybdate/tungstate transport system ATP-binding protein [EC:3.6.3.- 3.6.3.55]
K06909	Akenti_specific	Seawater_specific	Akenti_specific	9	73	1	118	14.5479	0.00156657	0.00655372	8	xtmB; phage terminase large subunit
K11177	Akenti_specific	Seawater_specific	Akenti_specific	7	75	0	119	inf	0.00160662	0.00655372	7	yagR; xanthine dehydrogenase YagR molybdenum-binding subunit [EC:1.17.1.4]
K07223	Akenti_specific	Seawater_specific	Akenti_specific	7	75	0	119	inf	0.00160662	0.00655372	7	yfeX; porphyrinogen peroxidase [EC:1.11.1.-]
K03225	Akenti_specific	Seawater_specific	Akenti_specific	7	75	0	119	inf	0.00160662	0.00655372	7	yscQ, sctQ, hrcQ, ssaQ, spaO; type III secretion protein Q
K00133	Akenti_specific	Seawater_specific	Akenti_specific	77	5	92	27	4.51957	0.00148894	0.00651062	-15	asd; aspartate-semialdehyde dehydrogenase [EC:1.2.1.11]
K00673	Akenti_specific	Seawater_specific	Akenti_specific	15	67	5	114	5.10448	0.00146648	0.00641702	10	astA; arginine N-succinyltransferase [EC:2.3.1.109]
K10974	Akenti_specific	Seawater_specific	Akenti_specific	15	67	5	114	5.10448	0.00146648	0.00641702	10	codB; cytosine permease
K03426	Akenti_specific	Seawater_specific	Akenti_specific	34	48	24	95	2.80382	0.00146217	0.00641702	10	E3.6.1.22, NUDT12, nudC; NAD+ diphosphatase [EC:3.6.1.22]
K01878	Akenti_specific	Seawater_specific	Akenti_specific	48	34	42	77	2.58824	0.00146483	0.00641702	6	glyQ; glycyl-tRNA synthetase alpha chain [EC:6.1.1.14]
K05820	Akenti_specific	Seawater_specific	Akenti_specific	15	67	5	114	5.10448	0.00146648	0.00641702	10	hcaT; MFS transporter, PPP family, 3-phenylpropionic acid transporter
K07136	Akenti_specific	Seawater_specific	Akenti_specific	15	67	5	114	5.10448	0.00146648	0.00641702	10	K07136; uncharacterized protein
K07130	Akenti_specific	Seawater_specific	Akenti_specific	15	67	5	114	5.10448	0.00146648	0.00641702	10	kynB; arylformamidase [EC:3.5.1.9]
K01669	Akenti_specific	Seawater_specific	Seawater_specific	67	15	114	5	0.195906	0.00146648	0.00641702	-47	phrB; deoxyribodipyrimidine photo-lyase [EC:4.1.99.3]
K03296	Akenti_specific	Seawater_specific	Akenti_specific	49	33	43	76	2.62438	0.00145923	0.00641702	6	TC.HAE1; hydrophobic/amphiphilic exporter-1 (mainly G- bacteria), HAE1 family
K03406	Akenti_specific	Seawater_specific	Akenti_specific	27	55	16	103	3.16023	0.0014556	0.00641096	11	mcp; methyl-accepting chemotaxis protein
K18453	Akenti_specific	Seawater_specific	Akenti_specific	27	55	16	103	3.16023	0.0014556	0.00641096	11	NUDT23; ADP-ribose/FAD diphosphatase [EC:3.6.1.13 3.6.1.18]
K07160	Akenti_specific	Seawater_specific	Akenti_specific	39	43	30	89	2.6907	0.00144094	0.00635563	9	K07160; UPF0271 protein
K00411	Akenti_specific	Seawater_specific	Akenti_specific	38	44	29	90	2.68025	0.00140995	0.00622343	9	UQCRFS1, RIP1, petA; ubiquinol-cytochrome c reductase iron-sulfur subunit [EC:1.10.2.2]
K02498	Akenti_specific	Seawater_specific	Akenti_specific	33	49	23	96	2.811	0.00139524	0.006163	10	hemY; HemY protein
K02427	Akenti_specific	Seawater_specific	Akenti_specific	47	35	40	79	2.65214	0.00136791	0.00604664	7	rlmE, rrmJ, ftsJ; 23S rRNA (uridine2552-2'-O)-methyltransferase [EC:2.1.1.166]
K03924	Akenti_specific	Seawater_specific	Akenti_specific	69	13	75	44	3.11385	0.0013406	0.00593025	-6	moxR; MoxR-like ATPase [EC:3.6.3.-]
K01698	Akenti_specific	Seawater_specific	Akenti_specific	74	8	85	34	3.7	0.00133569	0.00591283	-11	hemB, ALAD; porphobilinogen synthase [EC:4.2.1.24]
K01118	Akenti_specific	Seawater_specific	Akenti_specific	21	61	10	109	3.75246	0.00128823	0.00570688	11	acpD, azoR; FMN-dependent NADH-azoreductase [EC:1.7.1.17]
K12262	Akenti_specific	Seawater_specific	Akenti_specific	21	61	10	109	3.75246	0.00128823	0.00570688	11	cybB; cytochrome b561
K18473	Akenti_specific	Seawater_specific	Akenti_specific	21	61	10	109	3.75246	0.00128823	0.00570688	11	fabY; acetoacetyl-[acyl-carrier protein] synthase [EC:2.3.1.180]
K03821	Akenti_specific	Seawater_specific	Akenti_specific	21	61	10	109	3.75246	0.00128823	0.00570688	11	phbC, phaC; polyhydroxyalkanoate synthase subunit PhaC [EC:2.3.1.-]
K01187	Akenti_specific	Seawater_specific	Seawater_specific	16	66	49	70	0.34632	0.00128362	0.00570309	-33	malZ; alpha-glucosidase [EC:3.2.1.20]
K08082	Akenti_specific	Seawater_specific	Akenti_specific	26	56	15	104	3.21905	0.00127439	0.00566624	11	algZ; two-component system, LytTR family, sensor histidine kinase AlgZ [EC:2.7.13.3]
K07305	Akenti_specific	Seawater_specific	Seawater_specific	56	26	104	15	0.310651	0.00127439	0.00566624	-48	msrB; peptide-methionine (R)-S-oxide reductase [EC:1.8.4.12]
K07714	Akenti_specific	Seawater_specific	Akenti_specific	19	63	8	111	4.18452	0.00126137	0.00561655	11	atoC; two-component system, NtrC family, response regulator AtoC
K03762	Akenti_specific	Seawater_specific	Akenti_specific	19	63	8	111	4.18452	0.00126137	0.00561655	11	proP; MFS transporter, MHS family, proline/betaine transporter
K01185	Akenti_specific	Seawater_specific	Seawater_specific	6	76	30	89	0.234211	0.00124259	0.00554104	-24	E3.2.1.17; lysozyme [EC:3.2.1.17]
K02652	Akenti_specific	Seawater_specific	Akenti_specific	43	39	35	84	2.64615	0.00120525	0.00538165	8	pilB; type IV pilus assembly protein PilB
K03529	Akenti_specific	Seawater_specific	Seawater_specific	38	44	83	36	0.374589	0.00120596	0.00538165	-45	smc; chromosome segregation protein
K07574	Akenti_specific	Seawater_specific	Akenti_specific	29	53	18	101	3.07023	0.0011923	0.00532853	11	yhbY; RNA-binding protein
K12132	Akenti_specific	Seawater_specific	Akenti_specific	33	49	22	97	2.96939	0.00116191	0.00519653	11	prkC, stkP; eukaryotic-like serine/threonine-protein kinase [EC:2.7.11.1]
K06911	Akenti_specific	Seawater_specific	Seawater_specific	45	37	92	27	0.356933	0.00114554	0.00512711	-47	K06911; uncharacterized protein
K20862	Akenti_specific	Seawater_specific	Akenti_specific	17	65	6	113	4.92564	0.00113429	0.0050805	11	yigB; FMN hydrolase / 5-amino-6-(5-phospho-D-ribitylamino)uracil phosphatase [EC:3.1.3.102 3.1.3.104]
K02405	Akenti_specific	Seawater_specific	Akenti_specific	36	46	26	93	2.79933	0.00109845	0.00492358	10	fliA; RNA polymerase sigma factor for flagellar operon FliA
K03566	Akenti_specific	Seawater_specific	Akenti_specific	28	54	17	102	3.11111	0.00109843	0.00492358	11	gcvA; LysR family transcriptional regulator, glycine cleavage system transcriptional activator
K09769	Akenti_specific	Seawater_specific	Akenti_specific	28	54	17	102	3.11111	0.00109843	0.00492358	11	K09769; uncharacterized protein
K10747	Akenti_specific	Seawater_specific	Seawater_specific	15	67	48	71	0.331157	0.00109095	0.0049008	-33	LIG1; DNA ligase 1 [EC:6.5.1.1 6.5.1.6 6.5.1.7]
K02074	Akenti_specific	Seawater_specific	Seawater_specific	7	75	32	87	0.25375	0.00105576	0.00474625	-25	ABC.ZM.A; zinc/manganese transport system ATP-binding protein
K02112	Akenti_specific	Seawater_specific	Akenti_specific	75	7	87	32	3.94089	0.00105576	0.00474625	-12	ATPF1B, atpD; F-type H+-transporting ATPase subunit beta [EC:7.1.2.2]
K02182	Akenti_specific	Seawater_specific	Seawater_specific	7	75	32	87	0.25375	0.00105576	0.00474625	-25	caiC; carnitine-CoA ligase [EC:6.2.1.48]
K13541	Akenti_specific	Seawater_specific	Seawater_specific	7	75	32	87	0.25375	0.00105576	0.00474625	-25	cbiGH-cobJ; cobalt-precorrin 5A hydrolase / precorrin-3B C17-methyltransferase [EC:3.7.1.12 2.1.1.131]
K00464	Akenti_specific	Seawater_specific	Seawater_specific	4	78	25	94	0.192821	0.00104322	0.00470378	-21	diox1; all-trans-8'-apo-beta-carotenal 15,15'-oxygenase [EC:1.13.11.75]
K00696	Akenti_specific	Seawater_specific	Seawater_specific	4	78	25	94	0.192821	0.00104322	0.00470378	-21	E2.4.1.14; sucrose-phosphate synthase [EC:2.4.1.14]
K00088	Akenti_specific	Seawater_specific	Akenti_specific	78	4	94	25	5.18617	0.00104322	0.00470378	-16	IMPDH, guaB; IMP dehydrogenase [EC:1.1.1.205]
K09166	Akenti_specific	Seawater_specific	Seawater_specific	4	78	25	94	0.192821	0.00104322	0.00470378	-21	K09166; uncharacterized protein
K14441	Akenti_specific	Seawater_specific	Seawater_specific	40	42	86	33	0.365449	0.00103892	0.00469831	-46	rimO; ribosomal protein S12 methylthiotransferase [EC:2.8.4.4]
K01697	Akenti_specific	Seawater_specific	Seawater_specific	9	73	37	82	0.273232	0.00102645	0.00464539	-28	CBS; cystathionine beta-synthase [EC:4.2.1.22]
K06898	Akenti_specific	Seawater_specific	Seawater_specific	9	73	37	82	0.273232	0.00102645	0.00464539	-28	larB; pyridinium-3,5-biscarboxylic acid mononucleotide synthase [EC:2.5.1.143]
K00215	Akenti_specific	Seawater_specific	Akenti_specific	75	7	86	33	4.1113	0.00102479	0.00464478	-11	dapB; 4-hydroxy-tetrahydrodipicolinate reductase [EC:1.17.1.8]
K06885	Akenti_specific	Seawater_specific	Seawater_specific	19	63	55	64	0.350938	0.00102316	0.00464478	-36	K06885; uncharacterized protein
K03685	Akenti_specific	Seawater_specific	Akenti_specific	75	7	86	33	4.1113	0.00102479	0.00464478	-11	rnc, DROSHA, RNT1; ribonuclease III [EC:3.1.26.3]
K07042	Akenti_specific	Seawater_specific	Akenti_specific	75	7	86	33	4.1113	0.00102479	0.00464478	-11	ybeY, yqfG; probable rRNA maturation factor
K10232	Akenti_specific	Seawater_specific	Seawater_specific	2	80	20	99	0.12375	0.00100006	0.00454627	-18	aglE, ggtB; alpha-glucoside transport system substrate-binding protein
K10234	Akenti_specific	Seawater_specific	Seawater_specific	2	80	20	99	0.12375	0.00100006	0.00454627	-18	aglG, ggtD; alpha-glucoside transport system permease protein
K00320	Akenti_specific	Seawater_specific	Seawater_specific	2	80	20	99	0.12375	0.00100006	0.00454627	-18	mer; 5,10-methylenetetrahydromethanopterin reductase [EC:1.5.98.2]
K02641	Akenti_specific	Seawater_specific	Seawater_specific	2	80	20	99	0.12375	0.00100006	0.00454627	-18	petH; ferredoxin--NADP+ reductase [EC:1.18.1.2]
K10794	Akenti_specific	Seawater_specific	Seawater_specific	2	80	20	99	0.12375	0.00100006	0.00454627	-18	prdB; D-proline reductase (dithiol) PrdB [EC:1.21.4.1]
K01470	Akenti_specific	Seawater_specific	Seawater_specific	18	64	53	66	0.350236	0.000992172	0.00452734	-35	E3.5.2.10; creatinine amidohydrolase [EC:3.5.2.10]
K14448	Akenti_specific	Seawater_specific	Seawater_specific	4	78	26	93	0.183432	0.000988827	0.00451547	-22	mcd; (2S)-methylsuccinyl-CoA dehydrogenase [EC:1.3.8.12]
K03043	Akenti_specific	Seawater_specific	Akenti_specific	78	4	93	26	5.45161	0.000988827	0.00451547	-15	rpoB; DNA-directed RNA polymerase subunit beta [EC:2.7.7.6]
K01079	Akenti_specific	Seawater_specific	Akenti_specific	52	30	47	72	2.65532	0.000980146	0.00448256	5	serB, PSPH; phosphoserine phosphatase [EC:3.1.3.3]
K15513	Akenti_specific	Seawater_specific	Seawater_specific	0	82	14	105	0	0.000968585	0.00443303	-14	boxC; benzoyl-CoA-dihydrodiol lyase [EC:4.1.2.44]
K02286	Akenti_specific	Seawater_specific	Seawater_specific	0	82	14	105	0	0.000968585	0.00443303	-14	cpcC; phycocyanin-associated rod linker protein
K14520	Akenti_specific	Seawater_specific	Seawater_specific	0	82	14	105	0	0.000968585	0.00443303	-14	hapE; 4-hydroxyacetophenone monooxygenase [EC:1.14.13.84]
K04108	Akenti_specific	Seawater_specific	Seawater_specific	0	82	14	105	0	0.000968585	0.00443303	-14	hcrA, hbaC; 4-hydroxybenzoyl-CoA reductase subunit alpha [EC:1.3.7.9]
K02638	Akenti_specific	Seawater_specific	Seawater_specific	0	82	14	105	0	0.000968585	0.00443303	-14	petE; plastocyanin
K02640	Akenti_specific	Seawater_specific	Seawater_specific	0	82	14	105	0	0.000968585	0.00443303	-14	petG; cytochrome b6-f complex subunit 5
K13574	Akenti_specific	Seawater_specific	Seawater_specific	0	82	14	105	0	0.000968585	0.00443303	-14	ybiC; uncharacterized oxidoreductase [EC:1.1.1.-]
K05367	Akenti_specific	Seawater_specific	Akenti_specific	18	64	7	112	4.5	0.000946561	0.00435518	11	pbpC; penicillin-binding protein 1C [EC:2.4.1.129]
K20814	Akenti_specific	Seawater_specific	Seawater_specific	0	82	13	106	0	0.000936135	0.00431048	-13	dop; Pup amidohydrolase [EC:3.5.1.119]
K13356	Akenti_specific	Seawater_specific	Seawater_specific	0	82	13	106	0	0.000936135	0.00431048	-13	FAR; alcohol-forming fatty acyl-CoA reductase [EC:1.2.1.84]
K18479	Akenti_specific	Seawater_specific	Seawater_specific	0	82	13	106	0	0.000936135	0.00431048	-13	yihS; sulfoquinovose isomerase [EC:5.3.1.31]
K01920	Akenti_specific	Seawater_specific	Akenti_specific	51	31	45	74	2.70538	0.000913287	0.00421485	6	gshB; glutathione synthase [EC:6.3.2.3]
K07738	Akenti_specific	Seawater_specific	Akenti_specific	56	26	52	67	2.77515	0.00088015	0.00406501	4	nrdR; transcriptional repressor NrdR
K02039	Akenti_specific	Seawater_specific	Akenti_specific	56	26	52	67	2.77515	0.00088015	0.00406501	4	phoU; phosphate transport system protein
K00855	Akenti_specific	Seawater_specific	Seawater_specific	5	77	28	91	0.211039	0.000879191	0.00406501	-23	PRK, prkB; phosphoribulokinase [EC:2.7.1.19]
K03545	Akenti_specific	Seawater_specific	Akenti_specific	77	5	91	28	4.73846	0.000879191	0.00406501	-14	tig; trigger factor
K01206	Akenti_specific	Seawater_specific	Akenti_specific	15	67	4	115	6.43657	0.00087574	0.00405697	11	FUCA; alpha-L-fucosidase [EC:3.2.1.51]
K04655	Akenti_specific	Seawater_specific	Akenti_specific	15	67	4	115	6.43657	0.00087574	0.00405697	11	hypE; hydrogenase expression/formation protein HypE
K04065	Akenti_specific	Seawater_specific	Akenti_specific	15	67	4	115	6.43657	0.00087574	0.00405697	11	osmY; hyperosmotically inducible periplasmic protein
K07115	Akenti_specific	Seawater_specific	Akenti_specific	15	67	4	115	6.43657	0.00087574	0.00405697	11	rlmJ; 23S rRNA (adenine2030-N6)-methyltransferase [EC:2.1.1.266]
K03181	Akenti_specific	Seawater_specific	Akenti_specific	15	67	4	115	6.43657	0.00087574	0.00405697	11	ubiC; chorismate--pyruvate lyase [EC:4.1.3.40]
K04762	Akenti_specific	Seawater_specific	Akenti_specific	49	33	42	77	2.72222	0.00087068	0.00404896	7	hslR; ribosome-associated heat shock protein Hsp15
K01493	Akenti_specific	Seawater_specific	Akenti_specific	40	42	30	89	2.8254	0.000858714	0.00399637	10	comEB; dCMP deaminase [EC:3.5.4.12]
K00450	Akenti_specific	Seawater_specific	Seawater_specific	1	81	17	102	0.0740741	0.00084781	0.00394865	-16	E1.13.11.4; gentisate 1,2-dioxygenase [EC:1.13.11.4]
K12255	Akenti_specific	Seawater_specific	Seawater_specific	1	81	17	102	0.0740741	0.00084781	0.00394865	-16	gbuA; guanidinobutyrase [EC:3.5.3.7]
K07465	Akenti_specific	Seawater_specific	Seawater_specific	1	81	17	102	0.0740741	0.00084781	0.00394865	-16	K07465; putative RecB family exonuclease
K13527	Akenti_specific	Seawater_specific	Seawater_specific	1	81	17	102	0.0740741	0.00084781	0.00394865	-16	mpa; proteasome-associated ATPase
K15520	Akenti_specific	Seawater_specific	Seawater_specific	1	81	17	102	0.0740741	0.00084781	0.00394865	-16	mshD; mycothiol synthase [EC:2.3.1.189]
K17713	Akenti_specific	Seawater_specific	Akenti_specific	28	54	16	103	3.33796	0.00083771	0.00391662	12	bamB; outer membrane protein assembly factor BamB
K02664	Akenti_specific	Seawater_specific	Akenti_specific	28	54	16	103	3.33796	0.00083771	0.00391662	12	pilO; type IV pilus assembly protein PilO
K00684	Akenti_specific	Seawater_specific	Akenti_specific	60	22	59	60	2.7735	0.000832057	0.00389618	1	aat; leucyl/phenylalanyl-tRNA---protein transferase [EC:2.3.2.6]
K00390	Akenti_specific	Seawater_specific	Akenti_specific	46	36	38	81	2.72368	0.000806252	0.00377826	8	cysH; phosphoadenosine phosphosulfate reductase [EC:1.8.4.8 1.8.4.10]
K02563	Akenti_specific	Seawater_specific	Akenti_specific	74	8	84	35	3.85417	0.000802175	0.00376205	-10	murG; UDP-N-acetylglucosamine--N-acetylmuramyl-(pentapeptide) pyrophosphoryl-undecaprenol N-acetylglucosamine transferase [EC:2.4.1.227]
K01664	Akenti_specific	Seawater_specific	Seawater_specific	10	72	39	80	0.2849	0.000793768	0.0037255	-29	pabA; para-aminobenzoate synthetase component II [EC:2.6.1.85]
K07082	Akenti_specific	Seawater_specific	Akenti_specific	66	16	68	51	3.09375	0.00074467	0.00349776	-2	K07082; UPF0755 protein
K13587	Akenti_specific	Seawater_specific	Akenti_specific	16	66	5	114	5.52727	0.000726058	0.00341298	11	cckA; two-component system, cell cycle sensor histidine kinase and response regulator CckA [EC:2.7.13.3]
K03314	Akenti_specific	Seawater_specific	Akenti_specific	16	66	5	114	5.52727	0.000726058	0.00341298	11	nhaB; Na+:H+ antiporter, NhaB family
K08681	Akenti_specific	Seawater_specific	Seawater_specific	6	76	31	88	0.224109	0.00072596	0.00341298	-25	pdxT, pdx2; 5'-phosphate synthase pdxT subunit [EC:4.3.3.6]
K07692	Akenti_specific	Seawater_specific	Akenti_specific	22	60	10	109	3.99667	0.000693119	0.00326572	12	degU; two-component system, NarL family, response regulator DegU
K10536	Akenti_specific	Seawater_specific	Akenti_specific	30	52	18	101	3.23718	0.000679475	0.00320392	12	aguA; agmatine deiminase [EC:3.5.3.12]
K02204	Akenti_specific	Seawater_specific	Akenti_specific	30	52	18	101	3.23718	0.000679475	0.00320392	12	thrB2; homoserine kinase type II [EC:2.7.1.39]
K12251	Akenti_specific	Seawater_specific	Akenti_specific	24	58	12	107	3.68966	0.000675184	0.00319104	12	aguB; N-carbamoylputrescine amidase [EC:3.5.1.53]
K07708	Akenti_specific	Seawater_specific	Akenti_specific	38	44	27	92	2.94276	0.000675694	0.00319104	11	glnL, ntrB; two-component system, NtrC family, nitrogen regulation sensor histidine kinase GlnL [EC:2.7.13.3]
K02481	Akenti_specific	Seawater_specific	Akenti_specific	24	58	12	107	3.68966	0.000675184	0.00319104	12	K02481; two-component system, NtrC family, response regulator
K00763	Akenti_specific	Seawater_specific	Akenti_specific	38	44	27	92	2.94276	0.000675694	0.00319104	11	pncB, NAPRT1; nicotinate phosphoribosyltransferase [EC:6.3.4.21]
K03310	Akenti_specific	Seawater_specific	Akenti_specific	62	20	61	58	2.94754	0.000660416	0.00312861	1	TC.AGCS; alanine or glycine:cation symporter, AGCS family
K02081	Akenti_specific	Seawater_specific	Akenti_specific	10	72	1	118	16.3889	0.000654681	0.00310386	9	agaR; DeoR family transcriptional regulator, aga operon transcriptional repressor
K03415	Akenti_specific	Seawater_specific	Akenti_specific	10	72	1	118	16.3889	0.000654681	0.00310386	9	cheV; two-component system, chemotaxis family, chemotaxis protein CheV
K02363	Akenti_specific	Seawater_specific	Akenti_specific	10	72	1	118	16.3889	0.000654681	0.00310386	9	entE, dhbE, vibE, mxcE; 2,3-dihydroxybenzoate-AMP ligase [EC:6.3.2.14 2.7.7.58]
K07482	Akenti_specific	Seawater_specific	Akenti_specific	10	72	1	118	16.3889	0.000654681	0.00310386	9	K07482; transposase, IS30 family
K09859	Akenti_specific	Seawater_specific	Akenti_specific	10	72	1	118	16.3889	0.000654681	0.00310386	9	K09859; uncharacterized protein
K09891	Akenti_specific	Seawater_specific	Akenti_specific	10	72	1	118	16.3889	0.000654681	0.00310386	9	K09891; uncharacterized protein
K04068	Akenti_specific	Seawater_specific	Akenti_specific	10	72	1	118	16.3889	0.000654681	0.00310386	9	nrdG; anaerobic ribonucleoside-triphosphate reductase activating protein [EC:1.97.1.4]
K01573	Akenti_specific	Seawater_specific	Akenti_specific	10	72	1	118	16.3889	0.000654681	0.00310386	9	oadG; oxaloacetate decarboxylase, gamma subunit [EC:4.1.1.112]
K05561	Akenti_specific	Seawater_specific	Akenti_specific	10	72	1	118	16.3889	0.000654681	0.00310386	9	phaD; multicomponent K+:H+ antiporter subunit D
K05562	Akenti_specific	Seawater_specific	Akenti_specific	10	72	1	118	16.3889	0.000654681	0.00310386	9	phaE; multicomponent K+:H+ antiporter subunit E
K05563	Akenti_specific	Seawater_specific	Akenti_specific	10	72	1	118	16.3889	0.000654681	0.00310386	9	phaF; multicomponent K+:H+ antiporter subunit F
K05564	Akenti_specific	Seawater_specific	Akenti_specific	10	72	1	118	16.3889	0.000654681	0.00310386	9	phaG; multicomponent K+:H+ antiporter subunit G
K03148	Akenti_specific	Seawater_specific	Akenti_specific	10	72	1	118	16.3889	0.000654681	0.00310386	9	thiF; sulfur carrier protein ThiS adenylyltransferase [EC:2.7.7.73]
K06957	Akenti_specific	Seawater_specific	Akenti_specific	10	72	1	118	16.3889	0.000654681	0.00310386	9	tmcA; tRNA(Met) cytidine acetyltransferase [EC:2.3.1.193]
K02847	Akenti_specific	Seawater_specific	Akenti_specific	10	72	1	118	16.3889	0.000654681	0.00310386	9	waaL, rfaL; O-antigen ligase [EC:2.4.1.-]
K06147	Akenti_specific	Seawater_specific	Seawater_specific	56	26	105	14	0.287179	0.000631188	0.00302791	-49	ABCB-BAC; ATP-binding cassette, subfamily B, bacterial
K03417	Akenti_specific	Seawater_specific	Akenti_specific	26	56	14	105	3.48214	0.000631188	0.00302791	12	prpB; methylisocitrate lyase [EC:4.1.3.30]
K08151	Akenti_specific	Seawater_specific	Seawater_specific	19	63	56	63	0.339286	0.00063097	0.00302791	-37	tetA; MFS transporter, DHA1 family, tetracycline resistance protein
K05833	Akenti_specific	Seawater_specific	Akenti_specific	8	74	0	119	inf	0.000621117	0.00298667	8	ABC.X4.A; putative ABC transport system ATP-binding protein
K05832	Akenti_specific	Seawater_specific	Akenti_specific	8	74	0	119	inf	0.000621117	0.00298667	8	ABC.X4.P; putative ABC transport system permease protein
K02079	Akenti_specific	Seawater_specific	Akenti_specific	8	74	0	119	inf	0.000621117	0.00298667	8	agaA; N-acetylgalactosamine-6-phosphate deacetylase [EC:3.5.1.25]
K10972	Akenti_specific	Seawater_specific	Akenti_specific	8	74	0	119	inf	0.000621117	0.00298667	8	allS; LysR family transcriptional regulator, transcriptional activator of the allD operon
K03354	Akenti_specific	Seawater_specific	Akenti_specific	8	74	0	119	inf	0.000621117	0.00298667	8	APC7; anaphase-promoting complex subunit 7
K02124	Akenti_specific	Seawater_specific	Akenti_specific	18	64	6	113	5.29688	0.000595643	0.00298667	12	ATPVK, ntpK, atpK; V/A-type H+/Na+-transporting ATPase subunit K
K00196	Akenti_specific	Seawater_specific	Akenti_specific	8	74	0	119	inf	0.000621117	0.00298667	8	cooF; anaerobic carbon-monoxide dehydrogenase iron sulfur subunit
K02278	Akenti_specific	Seawater_specific	Akenti_specific	8	74	0	119	inf	0.000621117	0.00298667	8	cpaA, tadV; prepilin peptidase CpaA [EC:3.4.23.43]
K05851	Akenti_specific	Seawater_specific	Akenti_specific	8	74	0	119	inf	0.000621117	0.00298667	8	cyaA; adenylate cyclase, class 1 [EC:4.6.1.1]
K02045	Akenti_specific	Seawater_specific	Akenti_specific	8	74	0	119	inf	0.000621117	0.00298667	8	cysA; sulfate transport system ATP-binding protein [EC:3.6.3.25]
K02048	Akenti_specific	Seawater_specific	Akenti_specific	8	74	0	119	inf	0.000621117	0.00298667	8	cysP, sbp; sulfate transport system substrate-binding protein
K02046	Akenti_specific	Seawater_specific	Akenti_specific	8	74	0	119	inf	0.000621117	0.00298667	8	cysU; sulfate transport system permease protein
K02047	Akenti_specific	Seawater_specific	Akenti_specific	8	74	0	119	inf	0.000621117	0.00298667	8	cysW; sulfate transport system permease protein
K03112	Akenti_specific	Seawater_specific	Akenti_specific	8	74	0	119	inf	0.000621117	0.00298667	8	damX; DamX protein
K18930	Akenti_specific	Seawater_specific	Akenti_specific	8	74	0	119	inf	0.000621117	0.00298667	8	dld; D-lactate dehydrogenase
K11180	Akenti_specific	Seawater_specific	Akenti_specific	8	74	0	119	inf	0.000621117	0.00298667	8	dsrA; dissimilatory sulfite reductase alpha subunit [EC:1.8.99.5]
K11181	Akenti_specific	Seawater_specific	Akenti_specific	8	74	0	119	inf	0.000621117	0.00298667	8	dsrB; dissimilatory sulfite reductase beta subunit [EC:1.8.99.5]
K05934	Akenti_specific	Seawater_specific	Akenti_specific	18	64	6	113	5.29688	0.000595643	0.00298667	12	E2.1.1.131, cobJ, cbiH; precorrin-3B C17-methyltransferase [EC:2.1.1.131]
K20755	Akenti_specific	Seawater_specific	Akenti_specific	8	74	0	119	inf	0.000621117	0.00298667	8	E3.4.21.121; Lys-Lys/Arg-Xaa endopeptidase [EC:3.4.21.121]
K00836	Akenti_specific	Seawater_specific	Akenti_specific	8	74	0	119	inf	0.000621117	0.00298667	8	ectB, dat; diaminobutyrate-2-oxoglutarate transaminase [EC:2.6.1.76]
K04029	Akenti_specific	Seawater_specific	Akenti_specific	8	74	0	119	inf	0.000621117	0.00298667	8	eutP; ethanolamine utilization protein EutP
K04758	Akenti_specific	Seawater_specific	Akenti_specific	33	49	21	98	3.14286	0.000601589	0.00298667	12	feoA; ferrous iron transport protein A
K07326	Akenti_specific	Seawater_specific	Akenti_specific	8	74	0	119	inf	0.000621117	0.00298667	8	fhaC; hemolysin activation/secretion protein
K04095	Akenti_specific	Seawater_specific	Akenti_specific	8	74	0	119	inf	0.000621117	0.00298667	8	fic; cell filamentation protein
K06212	Akenti_specific	Seawater_specific	Akenti_specific	8	74	0	119	inf	0.000621117	0.00298667	8	focA; formate transporter
K03435	Akenti_specific	Seawater_specific	Akenti_specific	8	74	0	119	inf	0.000621117	0.00298667	8	fruR1, fruR; LacI family transcriptional regulator, fructose operon transcriptional repressor
K02430	Akenti_specific	Seawater_specific	Akenti_specific	8	74	0	119	inf	0.000621117	0.00298667	8	fucR; DeoR family transcriptional regulator, L-fucose operon activator
K08302	Akenti_specific	Seawater_specific	Akenti_specific	8	74	0	119	inf	0.000621117	0.00298667	8	gatY-kbaY; tagatose 1,6-diphosphate aldolase GatY/KbaY [EC:4.1.2.40]
K03567	Akenti_specific	Seawater_specific	Akenti_specific	18	64	6	113	5.29688	0.000595643	0.00298667	12	gcvR; glycine cleavage system transcriptional repressor
K00104	Akenti_specific	Seawater_specific	Seawater_specific	39	43	86	33	0.348026	0.000615785	0.00298667	-47	glcD; glycolate oxidase [EC:1.1.3.15]
K00057	Akenti_specific	Seawater_specific	Akenti_specific	73	9	81	38	3.80521	0.000606676	0.00298667	-8	gpsA; glycerol-3-phosphate dehydrogenase (NAD(P)+) [EC:1.1.1.94]
K03388	Akenti_specific	Seawater_specific	Akenti_specific	8	74	0	119	inf	0.000621117	0.00298667	8	hdrA2; heterodisulfide reductase subunit A2 [EC:1.8.7.3 1.8.98.4 1.8.98.5 1.8.98.6]
K03389	Akenti_specific	Seawater_specific	Akenti_specific	8	74	0	119	inf	0.000621117	0.00298667	8	hdrB2; heterodisulfide reductase subunit B2 [EC:1.8.7.3 1.8.98.4 1.8.98.5 1.8.98.6]
K03390	Akenti_specific	Seawater_specific	Akenti_specific	8	74	0	119	inf	0.000621117	0.00298667	8	hdrC2; heterodisulfide reductase subunit C2 [EC:1.8.7.3 1.8.98.4 1.8.98.5 1.8.98.6]
K03727	Akenti_specific	Seawater_specific	Seawater_specific	9	73	38	81	0.262797	0.000606676	0.00298667	-29	helY; ATP-dependent RNA helicase HelY [EC:3.6.4.-]
K18501	Akenti_specific	Seawater_specific	Akenti_specific	8	74	0	119	inf	0.000621117	0.00298667	8	hmeD; heterodisulfide reductase iron-sulfur subunit
K02339	Akenti_specific	Seawater_specific	Akenti_specific	36	46	25	94	2.94261	0.000619289	0.00298667	11	holC; DNA polymerase III subunit chi [EC:2.7.7.7]
K15359	Akenti_specific	Seawater_specific	Akenti_specific	8	74	0	119	inf	0.000621117	0.00298667	8	hspA; 6-hydroxy-3-succinoylpyridine 3-monooxygenase [EC:1.14.13.163]
K05787	Akenti_specific	Seawater_specific	Akenti_specific	8	74	0	119	inf	0.000621117	0.00298667	8	hupA; DNA-binding protein HU-alpha
K11896	Akenti_specific	Seawater_specific	Akenti_specific	8	74	0	119	inf	0.000621117	0.00298667	8	impG, vasA; type VI secretion system protein ImpG
K06877	Akenti_specific	Seawater_specific	Akenti_specific	18	64	6	113	5.29688	0.000595643	0.00298667	12	K06877; DEAD/DEAH box helicase domain-containing protein
K07034	Akenti_specific	Seawater_specific	Akenti_specific	8	74	0	119	inf	0.000621117	0.00298667	8	K07034; uncharacterized protein
K07076	Akenti_specific	Seawater_specific	Akenti_specific	8	74	0	119	inf	0.000621117	0.00298667	8	K07076; uncharacterized protein
K07394	Akenti_specific	Seawater_specific	Akenti_specific	8	74	0	119	inf	0.000621117	0.00298667	8	K07394; SM-20-related protein
K07457	Akenti_specific	Seawater_specific	Akenti_specific	8	74	0	119	inf	0.000621117	0.00298667	8	K07457; endonuclease III related protein
K08961	Akenti_specific	Seawater_specific	Akenti_specific	8	74	0	119	inf	0.000621117	0.00298667	8	K08961; chondroitin-sulfate-ABC endolyase/exolyase [EC:4.2.2.20 4.2.2.21]
K09764	Akenti_specific	Seawater_specific	Akenti_specific	8	74	0	119	inf	0.000621117	0.00298667	8	K09764; uncharacterized protein
K09858	Akenti_specific	Seawater_specific	Akenti_specific	33	49	21	98	3.14286	0.000601589	0.00298667	12	K09858; SEC-C motif domain protein
K09918	Akenti_specific	Seawater_specific	Akenti_specific	8	74	0	119	inf	0.000621117	0.00298667	8	K09918; uncharacterized protein
K09980	Akenti_specific	Seawater_specific	Akenti_specific	8	74	0	119	inf	0.000621117	0.00298667	8	K09980; uncharacterized protein
K18939	Akenti_specific	Seawater_specific	Akenti_specific	8	74	0	119	inf	0.000621117	0.00298667	8	lmrA, yxaF; TetR/AcrR family transcriptional regulator, lmrAB and yxaGH operons repressor
K07704	Akenti_specific	Seawater_specific	Akenti_specific	8	74	0	119	inf	0.000621117	0.00298667	8	lytS; two-component system, LytTR family, sensor histidine kinase LytS [EC:2.7.13.3]
K19304	Akenti_specific	Seawater_specific	Akenti_specific	42	40	32	87	2.85469	0.000594393	0.00298667	10	mepM; murein DD-endopeptidase [EC:3.4.24.-]
K18785	Akenti_specific	Seawater_specific	Akenti_specific	8	74	0	119	inf	0.000621117	0.00298667	8	mp2; beta-1,4-mannooligosaccharide/beta-1,4-mannosyl-N-acetylglucosamine phosphorylase [EC:2.4.1.319 2.4.1.320]
K02573	Akenti_specific	Seawater_specific	Akenti_specific	8	74	0	119	inf	0.000621117	0.00298667	8	napG; ferredoxin-type protein NapG
K15357	Akenti_specific	Seawater_specific	Akenti_specific	8	74	0	119	inf	0.000621117	0.00298667	8	nicD; N-formylmaleamate deformylase [EC:3.5.1.106]
K07722	Akenti_specific	Seawater_specific	Akenti_specific	8	74	0	119	inf	0.000621117	0.00298667	8	nikR; CopG family transcriptional regulator, nickel-responsive regulator
K18903	Akenti_specific	Seawater_specific	Akenti_specific	8	74	0	119	inf	0.000621117	0.00298667	8	oprC, opcM; outer membrane protein, multidrug efflux system
K01857	Akenti_specific	Seawater_specific	Akenti_specific	8	74	0	119	inf	0.000621117	0.00298667	8	pcaB; 3-carboxy-cis,cis-muconate cycloisomerase [EC:5.5.1.2]
K19609	Akenti_specific	Seawater_specific	Akenti_specific	8	74	0	119	inf	0.000621117	0.00298667	8	pfeS, pirS; two-component system, OmpR family, sensor histidine kinase PfeS [EC:2.7.13.3]
K02653	Akenti_specific	Seawater_specific	Akenti_specific	42	40	32	87	2.85469	0.000594393	0.00298667	10	pilC; type IV pilus assembly protein PilC
K00156	Akenti_specific	Seawater_specific	Akenti_specific	8	74	0	119	inf	0.000621117	0.00298667	8	poxB; pyruvate dehydrogenase (quinone) [EC:1.2.5.1]
K06136	Akenti_specific	Seawater_specific	Seawater_specific	7	75	34	85	0.233333	0.000591649	0.00298667	-27	pqqB; pyrroloquinoline quinone biosynthesis protein B
K02686	Akenti_specific	Seawater_specific	Akenti_specific	8	74	0	119	inf	0.000621117	0.00298667	8	priB; primosomal replication protein N
K16885	Akenti_specific	Seawater_specific	Akenti_specific	8	74	0	119	inf	0.000621117	0.00298667	8	qmoA; quinone-modifying oxidoreductase, subunit QmoA
K16886	Akenti_specific	Seawater_specific	Akenti_specific	8	74	0	119	inf	0.000621117	0.00298667	8	qmoB; quinone-modifying oxidoreductase, subunit QmoB
K16887	Akenti_specific	Seawater_specific	Akenti_specific	8	74	0	119	inf	0.000621117	0.00298667	8	qmoC; quinone-modifying oxidoreductase, subunit QmoC
K08970	Akenti_specific	Seawater_specific	Akenti_specific	8	74	0	119	inf	0.000621117	0.00298667	8	rcnA; nickel/cobalt exporter
K11391	Akenti_specific	Seawater_specific	Akenti_specific	8	74	0	119	inf	0.000621117	0.00298667	8	rlmG; 23S rRNA (guanine1835-N2)-methyltransferase [EC:2.1.1.174]
K05517	Akenti_specific	Seawater_specific	Akenti_specific	8	74	0	119	inf	0.000621117	0.00298667	8	tsx; nucleoside-specific channel-forming protein
K18581	Akenti_specific	Seawater_specific	Akenti_specific	8	74	0	119	inf	0.000621117	0.00298667	8	ugl; unsaturated chondroitin disaccharide hydrolase [EC:3.2.1.180]
K07675	Akenti_specific	Seawater_specific	Akenti_specific	8	74	0	119	inf	0.000621117	0.00298667	8	uhpB; two-component system, NarL family, sensor histidine kinase UhpB [EC:2.7.13.3]
K08219	Akenti_specific	Seawater_specific	Akenti_specific	8	74	0	119	inf	0.000621117	0.00298667	8	UMF2; MFS transporter, UMF2 family, putative MFS family transporter protein
K11932	Akenti_specific	Seawater_specific	Akenti_specific	8	74	0	119	inf	0.000621117	0.00298667	8	uspG; universal stress protein G
K13281	Akenti_specific	Seawater_specific	Akenti_specific	8	74	0	119	inf	0.000621117	0.00298667	8	uvsE, UVE1; UV DNA damage endonuclease [EC:3.-.-.-]
K13246	Akenti_specific	Seawater_specific	Akenti_specific	8	74	0	119	inf	0.000621117	0.00298667	8	vieA; c-di-GMP phosphodiesterase [EC:3.1.4.52]
K03204	Akenti_specific	Seawater_specific	Akenti_specific	8	74	0	119	inf	0.000621117	0.00298667	8	virB9, lvhB9; type IV secretion system protein VirB9
K03207	Akenti_specific	Seawater_specific	Akenti_specific	8	74	0	119	inf	0.000621117	0.00298667	8	wcaH; colanic acid biosynthesis protein WcaH [EC:3.6.1.-]
K07286	Akenti_specific	Seawater_specific	Akenti_specific	8	74	0	119	inf	0.000621117	0.00298667	8	yajG; uncharacterized lipoprotein
K03221	Akenti_specific	Seawater_specific	Akenti_specific	8	74	0	119	inf	0.000621117	0.00298667	8	yscF, sctF, ssaG, prgI; type III secretion protein F
K11145	Akenti_specific	Seawater_specific	Seawater_specific	3	79	24	95	0.150316	0.000579112	0.00297284	-21	K11145; ribonuclease III family protein [EC:3.1.26.-]
K09123	Akenti_specific	Seawater_specific	Seawater_specific	3	79	24	95	0.150316	0.000579112	0.00297284	-21	lhpI; cis-L-3-hydroxyproline dehydratase [EC:4.2.1.171]
K02959	Akenti_specific	Seawater_specific	Akenti_specific	79	3	95	24	6.65263	0.000579112	0.00297284	-16	RP-S16, MRPS16, rpsP; small subunit ribosomal protein S16
K07025	Akenti_specific	Seawater_specific	Seawater_specific	32	50	76	43	0.362105	0.000576471	0.0029668	-44	K07025; putative hydrolase of the HAD superfamily
K01144	Akenti_specific	Seawater_specific	Seawater_specific	14	68	48	71	0.304534	0.000568711	0.00292935	-34	E3.1.11.5; exodeoxyribonuclease V [EC:3.1.11.5]
K03190	Akenti_specific	Seawater_specific	Seawater_specific	11	71	42	77	0.284038	0.000568024	0.00292829	-31	ureD, ureH; urease accessory protein
K10233	Akenti_specific	Seawater_specific	Seawater_specific	2	80	21	98	0.116667	0.000562517	0.00290236	-19	aglF, ggtC; alpha-glucoside transport system permease protein
K00615	Akenti_specific	Seawater_specific	Akenti_specific	80	2	98	21	8.57143	0.000562517	0.00290236	-18	E2.2.1.1, tktA, tktB; transketolase [EC:2.2.1.1]
K00441	Akenti_specific	Seawater_specific	Seawater_specific	2	80	21	98	0.116667	0.000562517	0.00290236	-19	frhB; coenzyme F420 hydrogenase subunit beta [EC:1.12.98.1]
K07769	Akenti_specific	Seawater_specific	Seawater_specific	2	80	21	98	0.116667	0.000562517	0.00290236	-19	nblS; two-component system, OmpR family, sensor histidine kinase NblS [EC:2.7.13.3]
K03496	Akenti_specific	Seawater_specific	Akenti_specific	80	2	98	21	8.57143	0.000562517	0.00290236	-18	parA, soj; chromosome partitioning protein
K04564	Akenti_specific	Seawater_specific	Akenti_specific	64	18	64	55	3.05556	0.000555767	0.00287975	0	SOD2; superoxide dismutase, Fe-Mn family [EC:1.15.1.1]
K00380	Akenti_specific	Seawater_specific	Akenti_specific	21	61	9	110	4.20765	0.000554813	0.00287726	12	cysJ; sulfite reductase (NADPH) flavoprotein alpha-component [EC:1.8.1.2]
K02404	Akenti_specific	Seawater_specific	Akenti_specific	21	61	9	110	4.20765	0.000554813	0.00287726	12	flhF; flagellar biosynthesis protein FlhF
K06873	Akenti_specific	Seawater_specific	Seawater_specific	4	78	27	92	0.174739	0.000554013	0.00287726	-23	K06873; uncharacterized protein
K02902	Akenti_specific	Seawater_specific	Akenti_specific	78	4	92	27	5.72283	0.000554013	0.00287726	-14	RP-L28, MRPL28, rpmB; large subunit ribosomal protein L28
K01447	Akenti_specific	Seawater_specific	Akenti_specific	21	61	9	110	4.20765	0.000554813	0.00287726	12	xlyAB; N-acetylmuramoyl-L-alanine amidase [EC:3.5.1.28]
K03571	Akenti_specific	Seawater_specific	Akenti_specific	32	50	20	99	3.168	0.000546765	0.00284767	12	mreD; rod shape-determining protein MreD
K01007	Akenti_specific	Seawater_specific	Akenti_specific	32	50	20	99	3.168	0.000546765	0.00284767	12	pps, ppsA; pyruvate, water dikinase [EC:2.7.9.2]
K00830	Akenti_specific	Seawater_specific	Seawater_specific	25	57	66	53	0.352206	0.000537511	0.00280428	-41	AGXT; alanine-glyoxylate transaminase / serine-glyoxylate transaminase / serine-pyruvate transaminase [EC:2.6.1.44 2.6.1.45 2.6.1.51]
K00598	Akenti_specific	Seawater_specific	Seawater_specific	5	77	29	90	0.201523	0.000518523	0.00270755	-24	tam; trans-aconitate 2-methyltransferase [EC:2.1.1.144]
K04038	Akenti_specific	Seawater_specific	Seawater_specific	5	77	30	89	0.192641	0.000507316	0.00265131	-25	chlN; light-independent protochlorophyllide reductase subunit N [EC:1.3.7.7]
K01077	Akenti_specific	Seawater_specific	Akenti_specific	41	41	30	89	2.96667	0.000505815	0.00264574	11	E3.1.3.1, phoA, phoB; alkaline phosphatase [EC:3.1.3.1]
K02426	Akenti_specific	Seawater_specific	Seawater_specific	41	41	89	30	0.337079	0.000505815	0.00264574	-48	sufE; cysteine desulfuration protein SufE
K06916	Akenti_specific	Seawater_specific	Akenti_specific	41	41	30	89	2.96667	0.000505815	0.00264574	11	zapE; cell division protein ZapE
K06143	Akenti_specific	Seawater_specific	Akenti_specific	12	70	2	117	10.0286	0.000502291	0.0026341	10	creD; inner membrane protein
K09811	Akenti_specific	Seawater_specific	Akenti_specific	59	23	56	63	2.88587	0.000500356	0.0026341	3	ftsX; cell division transport system permease protein
K02480	Akenti_specific	Seawater_specific	Akenti_specific	12	70	2	117	10.0286	0.000502291	0.0026341	10	K02480; two-component system, NarL family, sensor kinase [EC:2.7.13.3]
K08972	Akenti_specific	Seawater_specific	Akenti_specific	12	70	2	117	10.0286	0.000502291	0.0026341	10	K08972; putative membrane protein
K02914	Akenti_specific	Seawater_specific	Akenti_specific	59	23	56	63	2.88587	0.000500356	0.0026341	3	RP-L34, MRPL34, rpmH; large subunit ribosomal protein L34
K08224	Akenti_specific	Seawater_specific	Akenti_specific	12	70	2	117	10.0286	0.000502291	0.0026341	10	ynfM; MFS transporter, YNFM family, putative membrane transport protein
K07709	Akenti_specific	Seawater_specific	Akenti_specific	12	70	2	117	10.0286	0.000502291	0.0026341	10	zraS, hydH; two-component system, NtrC family, sensor histidine kinase HydH [EC:2.7.13.3]
K00001	Akenti_specific	Seawater_specific	Akenti_specific	58	24	54	65	2.90895	0.000495788	0.0026158	4	E1.1.1.1, adh; alcohol dehydrogenase [EC:1.1.1.1]
K03216	Akenti_specific	Seawater_specific	Akenti_specific	58	24	54	65	2.90895	0.000495788	0.0026158	4	trmL, cspR; tRNA (cytidine/uridine-2'-O-)-methyltransferase [EC:2.1.1.207]
K01696	Akenti_specific	Seawater_specific	Akenti_specific	72	10	79	40	3.64557	0.000483946	0.00255776	-7	trpB; tryptophan synthase beta chain [EC:4.2.1.20]
K17725	Akenti_specific	Seawater_specific	Seawater_specific	8	74	36	83	0.249249	0.000480277	0.00254058	-28	ETHE1; sulfur dioxygenase [EC:1.13.11.18]
K04082	Akenti_specific	Seawater_specific	Akenti_specific	19	63	7	112	4.8254	0.000479063	0.00253636	12	hscB, HSCB, HSC20; molecular chaperone HscB
K07639	Akenti_specific	Seawater_specific	Akenti_specific	19	63	7	112	4.8254	0.000479063	0.00253636	12	rstB; two-component system, OmpR family, sensor histidine kinase RstB [EC:2.7.13.3]
K02285	Akenti_specific	Seawater_specific	Seawater_specific	0	82	15	104	0	0.000477123	0.00253362	-15	cpcB; phycocyanin beta chain
K09921	Akenti_specific	Seawater_specific	Akenti_specific	29	53	16	103	3.52241	0.000477712	0.00253362	13	K09921; uncharacterized protein
K19055	Akenti_specific	Seawater_specific	Akenti_specific	29	53	16	103	3.52241	0.000477712	0.00253362	13	prdX, proX; Ala-tRNA(Pro) deacylase [EC:3.1.1.-]
K01602	Akenti_specific	Seawater_specific	Seawater_specific	0	82	15	104	0	0.000477123	0.00253362	-15	rbcS; ribulose-bisphosphate carboxylase small chain [EC:4.1.1.39]
K08097	Akenti_specific	Seawater_specific	Seawater_specific	1	81	18	101	0.069273	0.000473792	0.00252163	-17	comA; phosphosulfolactate synthase [EC:4.4.1.19]
K19064	Akenti_specific	Seawater_specific	Seawater_specific	1	81	18	101	0.069273	0.000473792	0.00252163	-17	lysDH; lysine 6-dehydrogenase [EC:1.4.1.18]
K05582	Akenti_specific	Seawater_specific	Seawater_specific	1	81	18	101	0.069273	0.000473792	0.00252163	-17	ndhK; NAD(P)H-quinone oxidoreductase subunit K [EC:7.1.1.2]
K00481	Akenti_specific	Seawater_specific	Seawater_specific	1	81	18	101	0.069273	0.000473792	0.00252163	-17	pobA; p-hydroxybenzoate 3-monooxygenase [EC:1.14.13.2]
K01480	Akenti_specific	Seawater_specific	Seawater_specific	34	48	80	39	0.345313	0.000472512	0.00252163	-46	speB; agmatinase [EC:3.5.3.11]
K13894	Akenti_specific	Seawater_specific	Akenti_specific	35	47	23	96	3.10823	0.000458215	0.00244945	12	yejB; microcin C transport system permease protein
K07460	Akenti_specific	Seawater_specific	Akenti_specific	72	10	78	41	3.78462	0.00045731	0.00244677	-6	yraN; putative endonuclease
K06950	Akenti_specific	Seawater_specific	Akenti_specific	26	56	13	106	3.78571	0.000451117	0.00241576	13	K06950; uncharacterized protein
K11325	Akenti_specific	Seawater_specific	Seawater_specific	1	81	19	100	0.0649773	0.000450561	0.00241491	-18	K11325; L-cysteine/cystine lyase
K14470	Akenti_specific	Seawater_specific	Seawater_specific	1	81	19	100	0.0649773	0.000450561	0.00241491	-18	mct; 2-methylfumaryl-CoA isomerase [EC:5.4.1.3]
K19670	Akenti_specific	Seawater_specific	Seawater_specific	1	81	19	100	0.0649773	0.000450561	0.00241491	-18	phnA; phosphonoacetate hydrolase [EC:3.11.1.2]
K07080	Akenti_specific	Seawater_specific	Akenti_specific	34	48	22	97	3.12311	0.000436056	0.00234337	12	K07080; uncharacterized protein
K03428	Akenti_specific	Seawater_specific	Seawater_specific	6	76	32	87	0.214638	0.000423063	0.00227556	-26	bchM, chlM; magnesium-protoporphyrin O-methyltransferase [EC:2.1.1.11]
K06215	Akenti_specific	Seawater_specific	Seawater_specific	6	76	32	87	0.214638	0.000423063	0.00227556	-26	pdxS, pdx1; pyridoxal 5'-phosphate synthase pdxS subunit [EC:4.3.3.6]
K17323	Akenti_specific	Seawater_specific	Akenti_specific	14	68	3	116	7.96078	0.000420084	0.00226354	11	glpQ; glycerol transport system permease protein
K04654	Akenti_specific	Seawater_specific	Akenti_specific	14	68	3	116	7.96078	0.000420084	0.00226354	11	hypD; hydrogenase expression/formation protein HypD
K06166	Akenti_specific	Seawater_specific	Akenti_specific	14	68	3	116	7.96078	0.000420084	0.00226354	11	phnG; alpha-D-ribose 1-methylphosphonate 5-triphosphate synthase subunit PhnG [EC:2.7.8.37]
K06165	Akenti_specific	Seawater_specific	Akenti_specific	14	68	3	116	7.96078	0.000420084	0.00226354	11	phnH; alpha-D-ribose 1-methylphosphonate 5-triphosphate synthase subunit PhnH [EC:2.7.8.37]
K03773	Akenti_specific	Seawater_specific	Akenti_specific	44	38	34	85	2.89474	0.000408699	0.00221003	10	fklB; FKBP-type peptidyl-prolyl cis-trans isomerase FklB [EC:5.2.1.8]
K17231	Akenti_specific	Seawater_specific	Seawater_specific	15	67	50	69	0.308955	0.000407786	0.00220706	-35	IYD, DEHAL1; iodotyrosine deiodinase [EC:1.21.1.1]
K08311	Akenti_specific	Seawater_specific	Akenti_specific	45	37	35	84	2.91892	0.000407782	0.00220706	10	nudH; putative (di)nucleoside polyphosphate hydrolase [EC:3.6.1.-]
K01623	Akenti_specific	Seawater_specific	Seawater_specific	12	70	45	74	0.281905	0.000405324	0.00219765	-33	ALDO; fructose-bisphosphate aldolase, class I [EC:4.1.2.13]
K01739	Akenti_specific	Seawater_specific	Seawater_specific	12	70	45	74	0.281905	0.000405324	0.00219765	-33	metB; cystathionine gamma-synthase [EC:2.5.1.48]
K00243	Akenti_specific	Seawater_specific	Akenti_specific	28	54	15	104	3.59506	0.000392394	0.00213134	13	K00243; uncharacterized protein
K06023	Akenti_specific	Seawater_specific	Akenti_specific	23	59	10	109	4.24915	0.000368602	0.0020039	13	hprK, ptsK; HPr kinase/phosphorylase [EC:2.7.11.- 2.7.4.-]
K07023	Akenti_specific	Seawater_specific	Akenti_specific	23	59	10	109	4.24915	0.000368602	0.0020039	13	K07023; putative hydrolases of HD superfamily
K05802	Akenti_specific	Seawater_specific	Akenti_specific	23	59	10	109	4.24915	0.000368602	0.0020039	13	mscK, kefA, aefA; potassium-dependent mechanosensitive channel
K08678	Akenti_specific	Seawater_specific	Akenti_specific	23	59	10	109	4.24915	0.000368602	0.0020039	13	UXS1, uxs; UDP-glucuronate decarboxylase [EC:4.1.1.35]
K01523	Akenti_specific	Seawater_specific	Akenti_specific	38	44	26	93	3.08916	0.000362728	0.00197905	12	hisE; phosphoribosyl-ATP pyrophosphohydrolase [EC:3.6.1.31]
K00945	Akenti_specific	Seawater_specific	Akenti_specific	73	9	80	39	3.95417	0.000357002	0.00194956	-7	cmk; CMP/dCMP kinase [EC:2.7.4.25]
K03932	Akenti_specific	Seawater_specific	Seawater_specific	9	73	39	80	0.252898	0.000357002	0.00194956	-30	lpqC; polyhydroxybutyrate depolymerase
K01695	Akenti_specific	Seawater_specific	Akenti_specific	73	9	80	39	3.95417	0.000357002	0.00194956	-7	trpA; tryptophan synthase alpha chain [EC:4.2.1.20]
K11249	Akenti_specific	Seawater_specific	Akenti_specific	17	65	5	114	5.96308	0.000354801	0.00194278	12	eamB; cysteine/O-acetylserine efflux protein
K07794	Akenti_specific	Seawater_specific	Akenti_specific	17	65	5	114	5.96308	0.000354801	0.00194278	12	tctB; putative tricarboxylic transport membrane protein
K08307	Akenti_specific	Seawater_specific	Akenti_specific	43	39	32	87	2.9976	0.000341586	0.00187379	11	mltD, dniR; membrane-bound lytic murein transglycosylase D [EC:4.2.2.-]
K09772	Akenti_specific	Seawater_specific	Seawater_specific	7	75	35	84	0.224	0.000340051	0.00186706	-28	sepF; cell division inhibitor SepF
K18911	Akenti_specific	Seawater_specific	Akenti_specific	27	55	14	105	3.68182	0.000338119	0.00185812	13	egtD; L-histidine Nalpha-methyltransferase [EC:2.1.1.44]
K01243	Akenti_specific	Seawater_specific	Akenti_specific	27	55	14	105	3.68182	0.000338119	0.00185812	13	mtnN, mtn, pfs; adenosylhomocysteine nucleosidase [EC:3.2.2.9]
K02663	Akenti_specific	Seawater_specific	Akenti_specific	27	55	14	105	3.68182	0.000338119	0.00185812	13	pilN; type IV pilus assembly protein PilN
K00639	Akenti_specific	Seawater_specific	Akenti_specific	53	29	46	73	2.9003	0.000335583	0.0018492	7	kbl, GCAT; glycine C-acetyltransferase [EC:2.3.1.29]
K09835	Akenti_specific	Seawater_specific	Seawater_specific	3	79	25	94	0.142785	0.000325947	0.00179774	-22	crtISO, crtH; prolycopene isomerase [EC:5.2.1.13]
K13787	Akenti_specific	Seawater_specific	Seawater_specific	3	79	25	94	0.142785	0.000325947	0.00179774	-22	idsA; geranylgeranyl diphosphate synthase, type I [EC:2.5.1.1 2.5.1.10 2.5.1.29]
K00969	Akenti_specific	Seawater_specific	Akenti_specific	79	3	94	25	7.00355	0.000325947	0.00179774	-15	nadD; nicotinate-nucleotide adenylyltransferase [EC:2.7.7.18]
K00526	Akenti_specific	Seawater_specific	Akenti_specific	51	31	43	76	2.90773	0.000322835	0.00178543	8	E1.17.4.1B, nrdB, nrdF; ribonucleoside-diphosphate reductase beta chain [EC:1.17.4.1]
K09791	Akenti_specific	Seawater_specific	Akenti_specific	51	31	43	76	2.90773	0.000322835	0.00178543	8	K09791; uncharacterized protein
K12073	Akenti_specific	Seawater_specific	Seawater_specific	2	80	22	97	0.110227	0.00031725	0.00175774	-20	E3.1.2.28; 1,4-dihydroxy-2-naphthoyl-CoA hydrolase [EC:3.1.2.28]
K00366	Akenti_specific	Seawater_specific	Seawater_specific	2	80	22	97	0.110227	0.00031725	0.00175774	-20	nirA; ferredoxin-nitrite reductase [EC:1.7.7.1]
K17244	Akenti_specific	Seawater_specific	Seawater_specific	2	80	23	96	0.104348	0.000311807	0.00173074	-21	chiE; putative chitobiose transport system substrate-binding protein
K01721	Akenti_specific	Seawater_specific	Seawater_specific	2	80	23	96	0.104348	0.000311807	0.00173074	-21	nthA; nitrile hydratase subunit alpha [EC:4.2.1.84]
K20807	Akenti_specific	Seawater_specific	Seawater_specific	2	80	23	96	0.104348	0.000311807	0.00173074	-21	nthB; nitrile hydratase subunit beta [EC:4.2.1.84]
K03106	Akenti_specific	Seawater_specific	Akenti_specific	80	2	96	23	9.58333	0.000311807	0.00173074	-16	SRP54, ffh; signal recognition particle subunit SRP54 [EC:3.6.5.4]
K15789	Akenti_specific	Seawater_specific	Seawater_specific	2	80	23	96	0.104348	0.000311807	0.00173074	-21	TDH; threonine 3-dehydrogenase [EC:1.1.1.103]
K00281	Akenti_specific	Seawater_specific	Seawater_specific	49	33	99	20	0.299969	0.00030422	0.00169638	-50	GLDC, gcvP; glycine dehydrogenase [EC:1.4.4.2]
K00795	Akenti_specific	Seawater_specific	Akenti_specific	33	49	20	99	3.33367	0.00030422	0.00169638	13	ispA; farnesyl diphosphate synthase [EC:2.5.1.1 2.5.1.10]
K08177	Akenti_specific	Seawater_specific	Akenti_specific	24	58	11	108	4.0627	0.000303445	0.00169516	13	oxlT; MFS transporter, OFA family, oxalate/formate antiporter
K09928	Akenti_specific	Seawater_specific	Akenti_specific	49	33	40	79	2.93258	0.000299551	0.00167495	9	K09928; uncharacterized protein
K15257	Akenti_specific	Seawater_specific	Akenti_specific	22	60	9	110	4.48148	0.000283001	0.00158387	13	cmoB; tRNA (mo5U34)-methyltransferase [EC:2.1.1.-]
K01921	Akenti_specific	Seawater_specific	Akenti_specific	77	5	88	31	5.425	0.000281532	0.0015771	-11	ddl; D-alanine-D-alanine ligase [EC:6.3.2.4]
K01892	Akenti_specific	Seawater_specific	Akenti_specific	77	5	88	31	5.425	0.000281532	0.0015771	-11	HARS, hisS; histidyl-tRNA synthetase [EC:6.1.1.21]
K01991	Akenti_specific	Seawater_specific	Akenti_specific	32	50	19	100	3.36842	0.000281318	0.0015771	13	wza, gfcE; polysaccharide biosynthesis/export protein
K03113	Akenti_specific	Seawater_specific	Seawater_specific	23	59	65	54	0.323859	0.000274658	0.00154286	-42	EIF1, SUI1; translation initiation factor 1
K06190	Akenti_specific	Seawater_specific	Akenti_specific	41	41	29	90	3.10345	0.000272268	0.00153084	12	ispZ; intracellular septation protein
K16238	Akenti_specific	Seawater_specific	Akenti_specific	11	71	1	118	18.2817	0.000269288	0.00151549	10	eat, eutP; ethanolamine permease
K07165	Akenti_specific	Seawater_specific	Akenti_specific	11	71	1	118	18.2817	0.000269288	0.00151549	10	fecR; transmembrane sensor
K06282	Akenti_specific	Seawater_specific	Akenti_specific	11	71	1	118	18.2817	0.000269288	0.00151549	10	hyaA, hybO; hydrogenase small subunit [EC:1.12.99.6]
K06281	Akenti_specific	Seawater_specific	Akenti_specific	11	71	1	118	18.2817	0.000269288	0.00151549	10	hyaB, hybC; hydrogenase large subunit [EC:1.12.99.6]
K07799	Akenti_specific	Seawater_specific	Akenti_specific	11	71	1	118	18.2817	0.000269288	0.00151549	10	mdtA; membrane fusion protein, multidrug efflux system
K06899	Akenti_specific	Seawater_specific	Akenti_specific	11	71	1	118	18.2817	0.000269288	0.00151549	10	ndpA; nucleoid-associated protein
K05560	Akenti_specific	Seawater_specific	Akenti_specific	11	71	1	118	18.2817	0.000269288	0.00151549	10	phaC; multicomponent K+:H+ antiporter subunit C
K04093	Akenti_specific	Seawater_specific	Akenti_specific	11	71	1	118	18.2817	0.000269288	0.00151549	10	pheA1; chorismate mutase [EC:5.4.99.5]
K08352	Akenti_specific	Seawater_specific	Akenti_specific	11	71	1	118	18.2817	0.000269288	0.00151549	10	phsA, psrA; thiosulfate reductase / polysulfide reductase chain A [EC:1.8.5.5]
K19789	Akenti_specific	Seawater_specific	Akenti_specific	11	71	1	118	18.2817	0.000269288	0.00151549	10	radD; DNA repair protein RadD
K00432	Akenti_specific	Seawater_specific	Seawater_specific	34	48	81	38	0.332305	0.000265948	0.00151069	-47	gpx; glutathione peroxidase [EC:1.11.1.9]
K00946	Akenti_specific	Seawater_specific	Akenti_specific	66	16	66	53	3.3125	0.000265029	0.00150687	0	thiL; thiamine-monophosphate kinase [EC:2.7.4.16]
K01430	Akenti_specific	Seawater_specific	Seawater_specific	10	72	42	77	0.25463	0.000264127	0.00150315	-32	ureA; urease subunit gamma [EC:3.5.1.5]
K09691	Akenti_specific	Seawater_specific	Akenti_specific	27	55	13	106	4.0028	0.000248187	0.00141376	14	ABC-2.LPSE.A; lipopolysaccharide transport system ATP-binding protein
K02395	Akenti_specific	Seawater_specific	Akenti_specific	27	55	13	106	4.0028	0.000248187	0.00141376	14	flgJ; flagellar protein FlgJ
K16048	Akenti_specific	Seawater_specific	Seawater_specific	6	76	33	86	0.205742	0.000246247	0.00140534	-27	hsaB; 3-hydroxy-9,10-secoandrosta-1,3,5(10)-triene-9,17-dione monooxygenase reductase component [EC:1.5.1.-]
K00413	Akenti_specific	Seawater_specific	Akenti_specific	35	47	22	97	3.28337	0.000239705	0.00136929	13	CYC1, CYT1, petC; ubiquinol-cytochrome c reductase cytochrome c1 subunit
K00245	Akenti_specific	Seawater_specific	Akenti_specific	20	62	7	112	5.16129	0.000239139	0.00136734	13	frdB; fumarate reductase iron-sulfur subunit [EC:1.3.5.4]
K00246	Akenti_specific	Seawater_specific	Akenti_specific	20	62	7	112	5.16129	0.000239139	0.00136734	13	frdC; fumarate reductase subunit C
K03077	Akenti_specific	Seawater_specific	Akenti_specific	9	73	0	119	inf	0.000238148	0.00136425	9	araD, ulaF, sgaE, sgbE; L-ribulose-5-phosphate 4-epimerase [EC:5.1.3.4]
K09998	Akenti_specific	Seawater_specific	Akenti_specific	9	73	0	119	inf	0.000238148	0.00136425	9	artM; arginine transport system permease protein
K00929	Akenti_specific	Seawater_specific	Akenti_specific	9	73	0	119	inf	0.000238148	0.00136425	9	buk; butyrate kinase [EC:2.7.2.7]
K11938	Akenti_specific	Seawater_specific	Akenti_specific	9	73	0	119	inf	0.000238148	0.00136425	9	cof; HMP-PP phosphatase [EC:3.6.1.-]
K03520	Akenti_specific	Seawater_specific	Seawater_specific	12	70	46	73	0.27205	0.000237152	0.00136425	-34	coxL, cutL; aerobic carbon-monoxide dehydrogenase large subunit [EC:1.2.5.3]
K06079	Akenti_specific	Seawater_specific	Akenti_specific	9	73	0	119	inf	0.000238148	0.00136425	9	cutF, nlpE; copper homeostasis protein (lipoprotein)
K15726	Akenti_specific	Seawater_specific	Akenti_specific	9	73	0	119	inf	0.000238148	0.00136425	9	czcA; cobalt-zinc-cadmium resistance protein CzcA
K15727	Akenti_specific	Seawater_specific	Akenti_specific	9	73	0	119	inf	0.000238148	0.00136425	9	czcB; membrane fusion protein, cobalt-zinc-cadmium efflux system
K07792	Akenti_specific	Seawater_specific	Akenti_specific	9	73	0	119	inf	0.000238148	0.00136425	9	dcuB; anaerobic C4-dicarboxylate transporter DcuB
K07695	Akenti_specific	Seawater_specific	Seawater_specific	0	82	16	103	0	0.000237072	0.00136425	-16	devR; two-component system, NarL family, response regulator DevR
K00446	Akenti_specific	Seawater_specific	Seawater_specific	1	81	20	99	0.0611111	0.000232483	0.00136425	-19	dmpB, xylE; catechol 2,3-dioxygenase [EC:1.13.11.2]
K07308	Akenti_specific	Seawater_specific	Akenti_specific	9	73	0	119	inf	0.000238148	0.00136425	9	dmsC; anaerobic dimethyl sulfoxide reductase subunit C (DMSO reductase anchor subunit)
K11041	Akenti_specific	Seawater_specific	Akenti_specific	9	73	0	119	inf	0.000238148	0.00136425	9	eta; exfoliative toxin A/B
K16692	Akenti_specific	Seawater_specific	Akenti_specific	9	73	0	119	inf	0.000238148	0.00136425	9	etk-wzc; tyrosine-protein kinase Etk/Wzc [EC:2.7.10.-]
K02651	Akenti_specific	Seawater_specific	Akenti_specific	9	73	0	119	inf	0.000238148	0.00136425	9	flp, pilA; pilus assembly protein Flp/PilA
K07225	Akenti_specific	Seawater_specific	Akenti_specific	9	73	0	119	inf	0.000238148	0.00136425	9	hmuS; putative hemin transport protein
K20976	Akenti_specific	Seawater_specific	Akenti_specific	9	73	0	119	inf	0.000238148	0.00136425	9	hptB; histidine phosphotransfer protein HptB
K17995	Akenti_specific	Seawater_specific	Akenti_specific	9	73	0	119	inf	0.000238148	0.00136425	9	hydG; sulfhydrogenase subunit gamma (sulfur reductase) [EC:1.12.98.4]
K15373	Akenti_specific	Seawater_specific	Akenti_specific	9	73	0	119	inf	0.000238148	0.00136425	9	isfD; sulfoacetaldehyde reductase [EC:1.1.1.313]
K06926	Akenti_specific	Seawater_specific	Akenti_specific	9	73	0	119	inf	0.000238148	0.00136425	9	K06926; uncharacterized protein
K06933	Akenti_specific	Seawater_specific	Akenti_specific	9	73	0	119	inf	0.000238148	0.00136425	9	K06933; uncharacterized protein
K07014	Akenti_specific	Seawater_specific	Akenti_specific	9	73	0	119	inf	0.000238148	0.00136425	9	K07014; uncharacterized protein
K07493	Akenti_specific	Seawater_specific	Akenti_specific	9	73	0	119	inf	0.000238148	0.00136425	9	K07493; putative transposase
K07495	Akenti_specific	Seawater_specific	Akenti_specific	9	73	0	119	inf	0.000238148	0.00136425	9	K07495; putative transposase
K09910	Akenti_specific	Seawater_specific	Akenti_specific	9	73	0	119	inf	0.000238148	0.00136425	9	K09910; uncharacterized protein
K09915	Akenti_specific	Seawater_specific	Akenti_specific	9	73	0	119	inf	0.000238148	0.00136425	9	K09915; uncharacterized protein
K09946	Akenti_specific	Seawater_specific	Akenti_specific	9	73	0	119	inf	0.000238148	0.00136425	9	K09946; uncharacterized protein
K16327	Akenti_specific	Seawater_specific	Akenti_specific	9	73	0	119	inf	0.000238148	0.00136425	9	K16327; putative LysE/RhtB family amino acid efflux pump
K17325	Akenti_specific	Seawater_specific	Akenti_specific	16	66	4	115	6.9697	0.000225853	0.00136425	12	K17325, glpT; glycerol transport system ATP-binding protein
K02024	Akenti_specific	Seawater_specific	Akenti_specific	9	73	0	119	inf	0.000238148	0.00136425	9	lamB; maltoporin
K09988	Akenti_specific	Seawater_specific	Akenti_specific	9	73	0	119	inf	0.000238148	0.00136425	9	lyxA; D-lyxose ketol-isomerase [EC:5.3.1.15]
K10108	Akenti_specific	Seawater_specific	Akenti_specific	9	73	0	119	inf	0.000238148	0.00136425	9	malE; maltose/maltodextrin transport system substrate-binding protein
K10109	Akenti_specific	Seawater_specific	Akenti_specific	9	73	0	119	inf	0.000238148	0.00136425	9	malF; maltose/maltodextrin transport system permease protein
K10110	Akenti_specific	Seawater_specific	Akenti_specific	9	73	0	119	inf	0.000238148	0.00136425	9	malG; maltose/maltodextrin transport system permease protein
K03669	Akenti_specific	Seawater_specific	Akenti_specific	9	73	0	119	inf	0.000238148	0.00136425	9	mdoH; membrane glycosyltransferase [EC:2.4.1.-]
K02072	Akenti_specific	Seawater_specific	Akenti_specific	9	73	0	119	inf	0.000238148	0.00136425	9	metI; D-methionine transport system permease protein
K07253	Akenti_specific	Seawater_specific	Seawater_specific	1	81	20	99	0.0611111	0.000232483	0.00136425	-19	MIF; phenylpyruvate tautomerase [EC:5.3.2.1]
K02574	Akenti_specific	Seawater_specific	Akenti_specific	9	73	0	119	inf	0.000238148	0.00136425	9	napH; ferredoxin-type protein NapH
K05574	Akenti_specific	Seawater_specific	Seawater_specific	0	82	16	103	0	0.000237072	0.00136425	-16	ndhC; NAD(P)H-quinone oxidoreductase subunit 3 [EC:7.1.1.2]
K03717	Akenti_specific	Seawater_specific	Akenti_specific	9	73	0	119	inf	0.000238148	0.00136425	9	nhaR; LysR family transcriptional regulator, transcriptional activator of nhaA
K02586	Akenti_specific	Seawater_specific	Akenti_specific	9	73	0	119	inf	0.000238148	0.00136425	9	nifD; nitrogenase molybdenum-iron protein alpha chain [EC:1.18.6.1]
K02587	Akenti_specific	Seawater_specific	Akenti_specific	9	73	0	119	inf	0.000238148	0.00136425	9	nifE; nitrogenase molybdenum-cofactor synthesis protein NifE
K02591	Akenti_specific	Seawater_specific	Akenti_specific	9	73	0	119	inf	0.000238148	0.00136425	9	nifK; nitrogenase molybdenum-iron protein beta chain [EC:1.18.6.1]
K02592	Akenti_specific	Seawater_specific	Akenti_specific	9	73	0	119	inf	0.000238148	0.00136425	9	nifN; nitrogenase molybdenum-iron protein NifN
K18907	Akenti_specific	Seawater_specific	Akenti_specific	9	73	0	119	inf	0.000238148	0.00136425	9	norG; GntR family transcriptional regulator, regulator for abcA and norABC
K15876	Akenti_specific	Seawater_specific	Akenti_specific	9	73	0	119	inf	0.000238148	0.00136425	9	nrfH; cytochrome c nitrite reductase small subunit
K07233	Akenti_specific	Seawater_specific	Akenti_specific	9	73	0	119	inf	0.000238148	0.00136425	9	pcoB, copB; copper resistance protein B
K01026	Akenti_specific	Seawater_specific	Akenti_specific	16	66	4	115	6.9697	0.000225853	0.00136425	12	pct; propionate CoA-transferase [EC:2.8.3.1]
K13922	Akenti_specific	Seawater_specific	Akenti_specific	9	73	0	119	inf	0.000238148	0.00136425	9	pduP; propionaldehyde dehydrogenase [EC:1.2.1.87]
K05370	Akenti_specific	Seawater_specific	Seawater_specific	0	82	16	103	0	0.000237072	0.00136425	-16	pebB; phycoerythrobilin:ferredoxin oxidoreductase [EC:1.3.7.3]
K03689	Akenti_specific	Seawater_specific	Seawater_specific	0	82	16	103	0	0.000237072	0.00136425	-16	petN; cytochrome b6-f complex subunit 8
K00927	Akenti_specific	Seawater_specific	Akenti_specific	81	1	99	20	16.3636	0.000232483	0.00136425	-18	PGK, pgk; phosphoglycerate kinase [EC:2.7.2.3]
K08354	Akenti_specific	Seawater_specific	Akenti_specific	9	73	0	119	inf	0.000238148	0.00136425	9	phsC; thiosulfate reductase cytochrome b subunit
K00634	Akenti_specific	Seawater_specific	Akenti_specific	9	73	0	119	inf	0.000238148	0.00136425	9	ptb; phosphate butyryltransferase [EC:2.3.1.19]
K02784	Akenti_specific	Seawater_specific	Akenti_specific	9	73	0	119	inf	0.000238148	0.00136425	9	PTS-HPR.PTSH, ptsH; phosphocarrier protein HPr
K01200	Akenti_specific	Seawater_specific	Akenti_specific	9	73	0	119	inf	0.000238148	0.00136425	9	pulA; pullulanase [EC:3.2.1.41]
K07666	Akenti_specific	Seawater_specific	Akenti_specific	9	73	0	119	inf	0.000238148	0.00136425	9	qseB; two-component system, OmpR family, response regulator QseB
K03794	Akenti_specific	Seawater_specific	Akenti_specific	9	73	0	119	inf	0.000238148	0.00136425	9	sirB; sirohydrochlorin ferrochelatase [EC:4.99.1.4]
K03117	Akenti_specific	Seawater_specific	Akenti_specific	45	37	34	85	3.04054	0.000228967	0.00136425	11	tatB; sec-independent protein translocase protein TatB
K09771	Akenti_specific	Seawater_specific	Akenti_specific	9	73	0	119	inf	0.000238148	0.00136425	9	TC.SMR3; small multidrug resistance family-3 protein
K03707	Akenti_specific	Seawater_specific	Akenti_specific	16	66	4	115	6.9697	0.000225853	0.00136425	12	tenA; thiaminase (transcriptional activator TenA) [EC:3.5.99.2]
K15600	Akenti_specific	Seawater_specific	Akenti_specific	16	66	4	115	6.9697	0.000225853	0.00136425	12	thiZ; putative hydroxymethylpyrimidine transport system ATP-binding protein
K03465	Akenti_specific	Seawater_specific	Seawater_specific	12	70	46	73	0.27205	0.000237152	0.00136425	-34	thyX, thy1; thymidylate synthase (FAD) [EC:2.1.1.148]
K03646	Akenti_specific	Seawater_specific	Akenti_specific	9	73	0	119	inf	0.000238148	0.00136425	9	tolA; colicin import membrane protein
K12340	Akenti_specific	Seawater_specific	Akenti_specific	45	37	34	85	3.04054	0.000228967	0.00136425	11	tolC; outer membrane protein
K20266	Akenti_specific	Seawater_specific	Akenti_specific	9	73	0	119	inf	0.000238148	0.00136425	9	trbJ; type IV secretion system protein TrbJ
K07344	Akenti_specific	Seawater_specific	Akenti_specific	9	73	0	119	inf	0.000238148	0.00136425	9	trbL; type IV secretion system protein TrbL
K13041	Akenti_specific	Seawater_specific	Akenti_specific	9	73	0	119	inf	0.000238148	0.00136425	9	ttrR; two-component system, LuxR family, response regulator TtrR
K02848	Akenti_specific	Seawater_specific	Akenti_specific	9	73	0	119	inf	0.000238148	0.00136425	9	waaP, rfaP; heptose I phosphotransferase [EC:2.7.1.-]
K16345	Akenti_specific	Seawater_specific	Akenti_specific	9	73	0	119	inf	0.000238148	0.00136425	9	xanP; xanthine permease XanP
K07283	Akenti_specific	Seawater_specific	Akenti_specific	9	73	0	119	inf	0.000238148	0.00136425	9	ydiY; putative salt-induced outer membrane protein
K13778	Akenti_specific	Seawater_specific	Akenti_specific	13	69	2	117	11.0217	0.0002153	0.00132181	11	atuC; geranyl-CoA carboxylase beta subunit [EC:6.4.1.5]
K08762	Akenti_specific	Seawater_specific	Akenti_specific	13	69	2	117	11.0217	0.0002153	0.00132181	11	DBI, ACBP; diazepam-binding inhibitor (GABA receptor modulator, acyl-CoA-binding protein)
K11900	Akenti_specific	Seawater_specific	Akenti_specific	13	69	2	117	11.0217	0.0002153	0.00132181	11	impC; type VI secretion system protein ImpC
K05297	Akenti_specific	Seawater_specific	Akenti_specific	13	69	2	117	11.0217	0.0002153	0.00132181	11	rubB, alkT; rubredoxin---NAD+ reductase [EC:1.18.1.1]
K03745	Akenti_specific	Seawater_specific	Akenti_specific	13	69	2	117	11.0217	0.0002153	0.00132181	11	slyX; SlyX protein
K07236	Akenti_specific	Seawater_specific	Akenti_specific	13	69	2	117	11.0217	0.0002153	0.00132181	11	tusC, dsrF; tRNA 2-thiouridine synthesizing protein C
K02415	Akenti_specific	Seawater_specific	Akenti_specific	32	50	18	101	3.59111	0.000213514	0.00131884	14	fliL; flagellar FliL protein
K01563	Akenti_specific	Seawater_specific	Seawater_specific	19	63	59	60	0.306699	0.000209851	0.00129753	-40	dhaA; haloalkane dehalogenase [EC:3.8.1.5]
K02897	Akenti_specific	Seawater_specific	Akenti_specific	73	9	79	40	4.10689	0.000209475	0.00129652	-6	RP-L25, rplY; large subunit ribosomal protein L25
K00311	Akenti_specific	Seawater_specific	Akenti_specific	39	43	26	93	3.24419	0.00020454	0.00126727	13	ETFDH; electron-transferring-flavoprotein dehydrogenase [EC:1.5.5.1]
K03187	Akenti_specific	Seawater_specific	Seawater_specific	11	71	44	75	0.264085	0.000202383	0.00125519	-33	ureE; urease accessory protein
K01966	Akenti_specific	Seawater_specific	Seawater_specific	29	53	74	45	0.332738	0.000199385	0.00123786	-45	PCCB, pccB; propionyl-CoA carboxylase beta chain [EC:6.4.1.3 2.1.3.15]
K05808	Akenti_specific	Seawater_specific	Akenti_specific	64	18	62	57	3.26882	0.000197643	0.0012283	2	yhbH; putative sigma-54 modulation protein
K01734	Akenti_specific	Seawater_specific	Akenti_specific	24	58	10	109	4.51034	0.00019427	0.00120857	14	mgsA; methylglyoxal synthase [EC:4.2.3.3]
K13590	Akenti_specific	Seawater_specific	Akenti_specific	15	67	3	116	8.65672	0.000193985	0.00120804	12	dgcB; diguanylate cyclase [EC:2.7.7.65]
K00364	Akenti_specific	Seawater_specific	Akenti_specific	15	67	3	116	8.65672	0.000193985	0.00120804	12	E1.7.1.7, guaC; GMP reductase [EC:1.7.1.7]
K14987	Akenti_specific	Seawater_specific	Akenti_specific	15	67	3	116	8.65672	0.000193985	0.00120804	12	fixJ; two-component system, LuxR family, response regulator FixJ
K17324	Akenti_specific	Seawater_specific	Akenti_specific	15	67	3	116	8.65672	0.000193985	0.00120804	12	glpS; glycerol transport system ATP-binding protein
K04653	Akenti_specific	Seawater_specific	Akenti_specific	15	67	3	116	8.65672	0.000193985	0.00120804	12	hypC; hydrogenase expression/formation protein HypC
K04656	Akenti_specific	Seawater_specific	Akenti_specific	15	67	3	116	8.65672	0.000193985	0.00120804	12	hypF; hydrogenase maturation protein HypF
K17322	Akenti_specific	Seawater_specific	Akenti_specific	15	67	3	116	8.65672	0.000193985	0.00120804	12	K17322, glpP; glycerol transport system permease protein
K11250	Akenti_specific	Seawater_specific	Akenti_specific	15	67	3	116	8.65672	0.000193985	0.00120804	12	leuE; leucine efflux protein
K03672	Akenti_specific	Seawater_specific	Akenti_specific	15	67	3	116	8.65672	0.000193985	0.00120804	12	trxC; thioredoxin 2 [EC:1.8.1.8]
K09862	Akenti_specific	Seawater_specific	Akenti_specific	26	56	12	107	4.13988	0.000190303	0.00119613	14	K09862; uncharacterized protein
K06954	Akenti_specific	Seawater_specific	Akenti_specific	42	40	30	89	3.115	0.000187309	0.00117853	12	K06954; uncharacterized protein
K17686	Akenti_specific	Seawater_specific	Akenti_specific	43	39	31	88	3.12986	0.000186893	0.00117714	12	copA, ATP7; Cu+-exporting ATPase [EC:3.6.3.54]
K01659	Akenti_specific	Seawater_specific	Akenti_specific	22	60	8	111	5.0875	0.00018663	0.0011767	14	prpC; 2-methylcitrate synthase [EC:2.3.3.5]
K03597	Akenti_specific	Seawater_specific	Akenti_specific	22	60	8	111	5.0875	0.00018663	0.0011767	14	rseA; sigma-E factor negative regulatory protein RseA
K18534	Akenti_specific	Seawater_specific	Seawater_specific	3	79	26	93	0.135833	0.000183799	0.00116126	-23	K18534; MPBQ/MSBQ methyltransferase [EC:2.1.1.295]
K07260	Akenti_specific	Seawater_specific	Seawater_specific	3	79	26	93	0.135833	0.000183799	0.00116126	-23	vanY; zinc D-Ala-D-Ala carboxypeptidase [EC:3.4.17.14]
K01873	Akenti_specific	Seawater_specific	Akenti_specific	79	3	93	26	7.36201	0.000183799	0.00116126	-14	VARS, valS; valyl-tRNA synthetase [EC:6.1.1.9]
K03642	Akenti_specific	Seawater_specific	Akenti_specific	56	26	49	70	3.07692	0.000181874	0.00115269	7	rlpA; rare lipoprotein A
K01151	Akenti_specific	Seawater_specific	Akenti_specific	28	54	14	105	3.88889	0.000178426	0.00113202	14	nfo; deoxyribonuclease IV [EC:3.1.21.2]
K06894	Akenti_specific	Seawater_specific	Akenti_specific	18	64	5	114	6.4125	0.000171654	0.00109218	13	K06894; uncharacterized protein
K09898	Akenti_specific	Seawater_specific	Akenti_specific	19	63	6	113	5.67989	0.000171967	0.00109218	13	K09898; uncharacterized protein
K07637	Akenti_specific	Seawater_specific	Akenti_specific	19	63	6	113	5.67989	0.000171967	0.00109218	13	phoQ; two-component system, OmpR family, sensor histidine kinase PhoQ [EC:2.7.13.3]
K08325	Akenti_specific	Seawater_specific	Akenti_specific	19	63	6	113	5.67989	0.000171967	0.00109218	13	yqhD; NADP-dependent alcohol dehydrogenase [EC:1.1.-.-]
K09892	Akenti_specific	Seawater_specific	Akenti_specific	19	63	6	113	5.67989	0.000171967	0.00109218	13	zapB; cell division protein ZapB
K19967	Akenti_specific	Seawater_specific	Seawater_specific	2	80	24	95	0.0989583	0.000163204	0.00104197	-22	dta; D-threonine aldolase [EC:4.1.2.42]
K00564	Akenti_specific	Seawater_specific	Akenti_specific	30	52	16	103	3.71394	0.000161606	0.00103285	14	rsmC; 16S rRNA (guanine1207-N2)-methyltransferase [EC:2.1.1.172]
K06973	Akenti_specific	Seawater_specific	Akenti_specific	25	57	11	108	4.30622	0.000154597	0.000989096	14	K06973; uncharacterized protein
K01095	Akenti_specific	Seawater_specific	Akenti_specific	47	35	36	83	3.09603	0.000151957	0.000973232	11	pgpA; phosphatidylglycerophosphatase A [EC:3.1.3.27]
K02474	Akenti_specific	Seawater_specific	Akenti_specific	33	49	19	100	3.54458	0.000150821	0.000966974	14	wbpO; UDP-N-acetyl-D-galactosamine dehydrogenase [EC:1.1.1.-]
K00568	Akenti_specific	Seawater_specific	Akenti_specific	49	33	38	81	3.16507	0.000149838	0.000961686	11	ubiG; 2-polyprenyl-6-hydroxyphenyl methylase / 3-demethylubiquinone-9 3-methyltransferase [EC:2.1.1.222 2.1.1.64]
K07323	Akenti_specific	Seawater_specific	Akenti_specific	41	41	28	91	3.25	0.000144328	0.000927302	13	mlaC; phospholipid transport system substrate-binding protein
K04037	Akenti_specific	Seawater_specific	Seawater_specific	6	76	34	85	0.197368	0.000143269	0.000921472	-28	chlL; light-independent protochlorophyllide reductase subunit L [EC:1.3.7.7]
K00151	Akenti_specific	Seawater_specific	Seawater_specific	6	76	34	85	0.197368	0.000143269	0.000921472	-28	hpaE, hpcC; 5-carboxymethyl-2-hydroxymuconic-semialdehyde dehydrogenase [EC:1.2.1.60]
K09015	Akenti_specific	Seawater_specific	Seawater_specific	45	37	96	23	0.291385	0.000142876	0.000921472	-51	sufD; Fe-S cluster assembly protein SufD
K03657	Akenti_specific	Seawater_specific	Akenti_specific	76	6	85	34	5.06667	0.000143269	0.000921472	-9	uvrD, pcrA; DNA helicase II / ATP-dependent DNA helicase PcrA [EC:3.6.4.12]
K00282	Akenti_specific	Seawater_specific	Akenti_specific	23	59	9	110	4.7646	0.000142298	0.000919113	14	gcvPA; glycine dehydrogenase subunit 1 [EC:1.4.4.2]
K19416	Akenti_specific	Seawater_specific	Akenti_specific	23	59	9	110	4.7646	0.000142298	0.000919113	14	yccA; modulator of FtsH protease
K00549	Akenti_specific	Seawater_specific	Akenti_specific	40	42	27	92	3.24515	0.000141537	0.000916145	13	metE; 5-methyltetrahydropteroyltriglutamate--homocysteine methyltransferase [EC:2.1.1.14]
K13010	Akenti_specific	Seawater_specific	Akenti_specific	40	42	27	92	3.24515	0.000141537	0.000916145	13	per, rfbE; perosamine synthetase [EC:2.6.1.102]
K07669	Akenti_specific	Seawater_specific	Seawater_specific	6	76	35	84	0.189474	0.000135825	0.00088105	-29	mprA; two-component system, OmpR family, response regulator MprA
K00350	Akenti_specific	Seawater_specific	Akenti_specific	47	35	35	84	3.22286	0.000130986	0.000850572	12	nqrE; Na+-transporting NADH:ubiquinone oxidoreductase subunit E [EC:7.2.1.1]
K02018	Akenti_specific	Seawater_specific	Akenti_specific	45	37	33	86	3.16953	0.000127232	0.000827078	12	modB; molybdate transport system permease protein
K05979	Akenti_specific	Seawater_specific	Seawater_specific	9	73	41	78	0.234547	0.000122693	0.000798421	-32	comB; 2-phosphosulfolactate phosphatase [EC:3.1.3.71]
K05576	Akenti_specific	Seawater_specific	Seawater_specific	9	73	41	78	0.234547	0.000122693	0.000798421	-32	ndhE; NAD(P)H-quinone oxidoreductase subunit 4L [EC:7.1.1.2]
K02704	Akenti_specific	Seawater_specific	Seawater_specific	1	81	21	98	0.0576132	0.000120595	0.000786455	-20	psbB; photosystem II CP47 chlorophyll apoprotein
K09847	Akenti_specific	Seawater_specific	Seawater_specific	0	82	17	102	0	0.000119062	0.00077729	-17	crtA; spheroidene monooxygenase [EC:1.14.15.9]
K18455	Akenti_specific	Seawater_specific	Seawater_specific	0	82	17	102	0	0.000119062	0.00077729	-17	mca; mycothiol S-conjugate amidase [EC:3.5.1.115]
K15526	Akenti_specific	Seawater_specific	Seawater_specific	0	82	17	102	0	0.000119062	0.00077729	-17	mshC; L-cysteine:1D-myo-inositol 2-amino-2-deoxy-alpha-D-glucopyranoside ligase [EC:6.3.1.13]
K02637	Akenti_specific	Seawater_specific	Seawater_specific	0	82	17	102	0	0.000119062	0.00077729	-17	petD; cytochrome b6-f complex subunit 4
K02718	Akenti_specific	Seawater_specific	Seawater_specific	0	82	17	102	0	0.000119062	0.00077729	-17	psbT; photosystem II PsbT protein
K09914	Akenti_specific	Seawater_specific	Akenti_specific	12	70	1	118	20.2286	0.000109124	0.000716261	11	K09914; putative lipoprotein
K00346	Akenti_specific	Seawater_specific	Akenti_specific	45	37	32	87	3.30659	0.000109058	0.000716261	13	nqrA; Na+-transporting NADH:ubiquinone oxidoreductase subunit A [EC:7.2.1.1]
K05559	Akenti_specific	Seawater_specific	Akenti_specific	12	70	1	118	20.2286	0.000109124	0.000716261	11	phaA; multicomponent K+:H+ antiporter subunit A
K03184	Akenti_specific	Seawater_specific	Akenti_specific	12	70	1	118	20.2286	0.000109124	0.000716261	11	ubiF; 3-demethoxyubiquinol 3-hydroxylase [EC:1.14.99.60]
K11904	Akenti_specific	Seawater_specific	Akenti_specific	12	70	1	118	20.2286	0.000109124	0.000716261	11	vgrG; type VI secretion system secreted protein VgrG
K18446	Akenti_specific	Seawater_specific	Akenti_specific	12	70	1	118	20.2286	0.000109124	0.000716261	11	ygiF; triphosphatase [EC:3.6.1.25]
K00278	Akenti_specific	Seawater_specific	Akenti_specific	56	26	48	71	3.1859	0.000105974	0.000700119	8	nadB; L-aspartate oxidase [EC:1.4.3.16]
K03154	Akenti_specific	Seawater_specific	Akenti_specific	54	28	45	74	3.17143	0.000105736	0.000699309	9	thiS; sulfur carrier protein
K08481	Akenti_specific	Seawater_specific	Seawater_specific	3	79	27	92	0.129395	0.000103857	0.000687629	-24	kaiB; circadian clock protein KaiB
K06222	Akenti_specific	Seawater_specific	Akenti_specific	17	65	4	115	7.51923	0.000102128	0.000676919	13	dkgB; 2,5-diketo-D-gluconate reductase B [EC:1.1.1.346]
K06903	Akenti_specific	Seawater_specific	Akenti_specific	17	65	4	115	7.51923	0.000102128	0.000676919	13	K06903; uncharacterized protein
K01525	Akenti_specific	Seawater_specific	Akenti_specific	25	57	10	109	4.7807	0.000101758	0.000675942	15	apaH; bis(5'-nucleosyl)-tetraphosphatase (symmetrical) [EC:3.6.1.41]
K02584	Akenti_specific	Seawater_specific	Akenti_specific	25	57	10	109	4.7807	0.000101758	0.000675942	15	nifA; Nif-specific regulatory protein
K02558	Akenti_specific	Seawater_specific	Akenti_specific	43	39	30	89	3.27094	0.000101093	0.000672993	13	mpl; UDP-N-acetylmuramate: L-alanyl-gamma-D-glutamyl-meso-diaminopimelate ligase [EC:6.3.2.45]
K00824	Akenti_specific	Seawater_specific	Akenti_specific	38	44	24	95	3.41856	9.97817e-05	0.000664992	14	dat; D-alanine transaminase [EC:2.6.1.21]
K02495	Akenti_specific	Seawater_specific	Akenti_specific	38	44	24	95	3.41856	9.97817e-05	0.000664992	14	hemN, hemZ; oxygen-independent coproporphyrinogen III oxidase [EC:1.3.98.3]
K03306	Akenti_specific	Seawater_specific	Akenti_specific	38	44	24	95	3.41856	9.97817e-05	0.000664992	14	TC.PIT; inorganic phosphate transporter, PiT family
K06200	Akenti_specific	Seawater_specific	Akenti_specific	27	55	12	107	4.37727	9.94247e-05	0.0006648	15	cstA; carbon starvation protein
K02355	Akenti_specific	Seawater_specific	Akenti_specific	79	3	91	28	8.10256	9.79311e-05	0.000655534	-12	fusA, GFM, EFG; elongation factor G
K16149	Akenti_specific	Seawater_specific	Seawater_specific	3	79	28	91	0.123418	9.79311e-05	0.000655534	-25	K16149; 1,4-alpha-glucan branching enzyme [EC:2.4.1.18]
K05577	Akenti_specific	Seawater_specific	Seawater_specific	3	79	28	91	0.123418	9.79311e-05	0.000655534	-25	ndhF; NAD(P)H-quinone oxidoreductase subunit 5 [EC:7.1.1.2]
K08999	Akenti_specific	Seawater_specific	Seawater_specific	25	57	70	49	0.307018	9.63205e-05	0.000646891	-45	K08999; uncharacterized protein
K00970	Akenti_specific	Seawater_specific	Akenti_specific	60	22	54	65	3.28283	9.38761e-05	0.000631172	6	pcnB; poly(A) polymerase [EC:2.7.7.19]
K04562	Akenti_specific	Seawater_specific	Akenti_specific	29	53	14	105	4.10377	9.29403e-05	0.000625572	15	flhG, fleN; flagellar biosynthesis protein FlhG
K01496	Akenti_specific	Seawater_specific	Akenti_specific	50	32	39	80	3.20513	9.29094e-05	0.000625572	11	hisI; phosphoribosyl-AMP cyclohydrolase [EC:3.5.4.19]
K06966	Akenti_specific	Seawater_specific	Seawater_specific	53	29	105	14	0.243678	9.29403e-05	0.000625572	-52	ppnN; pyrimidine/purine-5'-nucleotide nucleosidase [EC:3.2.2.10 3.2.2.-]
K06016	Akenti_specific	Seawater_specific	Seawater_specific	16	66	55	64	0.282094	9.25196e-05	0.000624816	-39	pydC; beta-ureidopropionase / N-carbamoyl-L-amino-acid hydrolase [EC:3.5.1.6 3.5.1.87]
K09158	Akenti_specific	Seawater_specific	Akenti_specific	35	47	20	99	3.68617	9.09939e-05	0.000615196	15	K09158; uncharacterized protein
K09820	Akenti_specific	Seawater_specific	Akenti_specific	10	72	0	119	inf	9.0546e-05	0.000613733	10	ABC.MN.A; manganese/iron transport system ATP-binding protein
K03807	Akenti_specific	Seawater_specific	Akenti_specific	14	68	2	117	12.0441	9.06765e-05	0.000613733	12	ampE; AmpE protein
K01478	Akenti_specific	Seawater_specific	Akenti_specific	10	72	0	119	inf	9.0546e-05	0.000613733	10	arcA; arginine deiminase [EC:3.5.3.6]
K16783	Akenti_specific	Seawater_specific	Akenti_specific	10	72	0	119	inf	9.0546e-05	0.000613733	10	bioN; biotin transport system permease protein
K07464	Akenti_specific	Seawater_specific	Akenti_specific	10	72	0	119	inf	9.0546e-05	0.000613733	10	cas4; CRISPR-associated exonuclease Cas4 [EC:3.1.12.1]
K00198	Akenti_specific	Seawater_specific	Akenti_specific	10	72	0	119	inf	9.0546e-05	0.000613733	10	cooS, acsA; anaerobic carbon-monoxide dehydrogenase catalytic subunit [EC:1.2.7.4]
K05805	Akenti_specific	Seawater_specific	Akenti_specific	10	72	0	119	inf	9.0546e-05	0.000613733	10	creA; CreA protein
K07389	Akenti_specific	Seawater_specific	Akenti_specific	10	72	0	119	inf	9.0546e-05	0.000613733	10	cyaC, hlyC, rtxC; cytolysin-activating lysine-acyltransferase [EC:2.3.1.-]
K00573	Akenti_specific	Seawater_specific	Akenti_specific	59	23	52	67	3.30518	9.05024e-05	0.000613733	7	E2.1.1.77, pcm; protein-L-isoaspartate(D-aspartate) O-methyltransferase [EC:2.1.1.77]
K01150	Akenti_specific	Seawater_specific	Akenti_specific	10	72	0	119	inf	9.0546e-05	0.000613733	10	endA; deoxyribonuclease I [EC:3.1.21.1]
K17321	Akenti_specific	Seawater_specific	Akenti_specific	14	68	2	117	12.0441	9.06765e-05	0.000613733	12	glpV; glycerol transport system substrate-binding protein
K03674	Akenti_specific	Seawater_specific	Akenti_specific	10	72	0	119	inf	9.0546e-05	0.000613733	10	grxA; glutaredoxin 1
K05596	Akenti_specific	Seawater_specific	Akenti_specific	10	72	0	119	inf	9.0546e-05	0.000613733	10	iciA; LysR family transcriptional regulator, chromosome initiation inhibitor
K11258	Akenti_specific	Seawater_specific	Akenti_specific	10	72	0	119	inf	9.0546e-05	0.000613733	10	ilvM; acetolactate synthase II small subunit [EC:2.2.1.6]
K11892	Akenti_specific	Seawater_specific	Akenti_specific	10	72	0	119	inf	9.0546e-05	0.000613733	10	impK, ompA, vasF, dotU; type VI secretion system protein ImpK
K06906	Akenti_specific	Seawater_specific	Akenti_specific	10	72	0	119	inf	9.0546e-05	0.000613733	10	K06906; uncharacterized protein
K07074	Akenti_specific	Seawater_specific	Akenti_specific	10	72	0	119	inf	9.0546e-05	0.000613733	10	K07074; uncharacterized protein
K07216	Akenti_specific	Seawater_specific	Akenti_specific	16	66	3	116	9.37374	8.91185e-05	0.000613733	13	K07216; hemerythrin
K07485	Akenti_specific	Seawater_specific	Akenti_specific	10	72	0	119	inf	9.0546e-05	0.000613733	10	K07485; transposase
K07496	Akenti_specific	Seawater_specific	Akenti_specific	10	72	0	119	inf	9.0546e-05	0.000613733	10	K07496; putative transposase
K09116	Akenti_specific	Seawater_specific	Akenti_specific	10	72	0	119	inf	9.0546e-05	0.000613733	10	K09116; uncharacterized protein
K09749	Akenti_specific	Seawater_specific	Akenti_specific	10	72	0	119	inf	9.0546e-05	0.000613733	10	K09749; uncharacterized protein
K01815	Akenti_specific	Seawater_specific	Akenti_specific	10	72	0	119	inf	9.0546e-05	0.000613733	10	kduI; 4-deoxy-L-threo-5-hexosulose-uronate ketol-isomerase [EC:5.3.1.17]
K07122	Akenti_specific	Seawater_specific	Akenti_specific	10	72	0	119	inf	9.0546e-05	0.000613733	10	mlaB; phospholipid transport system transporter-binding protein
K08306	Akenti_specific	Seawater_specific	Akenti_specific	10	72	0	119	inf	9.0546e-05	0.000613733	10	mltC; membrane-bound lytic murein transglycosylase C [EC:4.2.2.-]
K07448	Akenti_specific	Seawater_specific	Akenti_specific	10	72	0	119	inf	9.0546e-05	0.000613733	10	mrr; restriction system protein
K02594	Akenti_specific	Seawater_specific	Akenti_specific	10	72	0	119	inf	9.0546e-05	0.000613733	10	nifV; homocitrate synthase NifV [EC:2.3.3.14]
K03385	Akenti_specific	Seawater_specific	Akenti_specific	10	72	0	119	inf	9.0546e-05	0.000613733	10	nrfA; nitrite reductase (cytochrome c-552) [EC:1.7.2.2]
K08312	Akenti_specific	Seawater_specific	Akenti_specific	14	68	2	117	12.0441	9.06765e-05	0.000613733	12	nudE; ADP-ribose diphosphatase [EC:3.6.1.-]
K17248	Akenti_specific	Seawater_specific	Akenti_specific	10	72	0	119	inf	9.0546e-05	0.000613733	10	pglJ; N-acetylgalactosamine-N,N'-diacetylbacillosaminyl-diphospho-undecaprenol 4-alpha-N-acetylgalactosaminyltransferase [EC:2.4.1.291]
K07455	Akenti_specific	Seawater_specific	Akenti_specific	10	72	0	119	inf	9.0546e-05	0.000613733	10	recT; recombination protein RecT
K06377	Akenti_specific	Seawater_specific	Akenti_specific	10	72	0	119	inf	9.0546e-05	0.000613733	10	spo0M; sporulation-control protein
K01667	Akenti_specific	Seawater_specific	Akenti_specific	10	72	0	119	inf	9.0546e-05	0.000613733	10	tnaA; tryptophanase [EC:4.1.99.1]
K03721	Akenti_specific	Seawater_specific	Akenti_specific	10	72	0	119	inf	9.0546e-05	0.000613733	10	tyrR; transcriptional regulator of aroF, aroG, tyrA and aromatic amino acid transport
K03188	Akenti_specific	Seawater_specific	Seawater_specific	10	72	44	75	0.236742	8.7117e-05	0.000613733	-34	ureF; urease accessory protein
K03205	Akenti_specific	Seawater_specific	Akenti_specific	10	72	0	119	inf	9.0546e-05	0.000613733	10	virD4, lvhD4; type IV secretion system protein VirD4
K13004	Akenti_specific	Seawater_specific	Akenti_specific	10	72	0	119	inf	9.0546e-05	0.000613733	10	wbtD; galacturonosyltransferase [EC:2.4.1.-]
K01146	Akenti_specific	Seawater_specific	Akenti_specific	10	72	0	119	inf	9.0546e-05	0.000613733	10	xni; protein Xni
K07084	Akenti_specific	Seawater_specific	Akenti_specific	10	72	0	119	inf	9.0546e-05	0.000613733	10	yuiF; putative amino acid transporter
K20454	Akenti_specific	Seawater_specific	Seawater_specific	5	77	33	86	0.169225	8.62722e-05	0.000610434	-28	dml; 2,3-dimethylmalate lyase [EC:4.1.3.32]
K07015	Akenti_specific	Seawater_specific	Seawater_specific	2	80	25	94	0.094	8.56313e-05	0.000606605	-23	K07015; uncharacterized protein
K09775	Akenti_specific	Seawater_specific	Seawater_specific	2	80	25	94	0.094	8.56313e-05	0.000606605	-23	K09775; uncharacterized protein
K07670	Akenti_specific	Seawater_specific	Seawater_specific	2	80	25	94	0.094	8.56313e-05	0.000606605	-23	mtrA; two-component system, OmpR family, response regulator MtrA
K03218	Akenti_specific	Seawater_specific	Akenti_specific	80	2	94	25	10.6383	8.56313e-05	0.000606605	-14	rlmB; 23S rRNA (guanosine2251-2'-O)-methyltransferase [EC:2.1.1.185]
K03169	Akenti_specific	Seawater_specific	Akenti_specific	31	51	16	103	3.91299	8.38903e-05	0.000597055	15	topB; DNA topoisomerase III [EC:5.99.1.2]
K07287	Akenti_specific	Seawater_specific	Akenti_specific	19	63	5	114	6.87619	8.24923e-05	0.000587794	14	bamC; outer membrane protein assembly factor BamC
K02496	Akenti_specific	Seawater_specific	Akenti_specific	19	63	5	114	6.87619	8.24923e-05	0.000587794	14	hemX; uroporphyrin-III C-methyltransferase [EC:2.1.1.107]
K01854	Akenti_specific	Seawater_specific	Akenti_specific	20	62	6	113	6.07527	8.05719e-05	0.000575459	14	glf; UDP-galactopyranose mutase [EC:5.4.99.9]
K06907	Akenti_specific	Seawater_specific	Akenti_specific	20	62	6	113	6.07527	8.05719e-05	0.000575459	14	K06907; uncharacterized protein
K03576	Akenti_specific	Seawater_specific	Akenti_specific	20	62	6	113	6.07527	8.05719e-05	0.000575459	14	metR; LysR family transcriptional regulator, regulator for metE and metH
K03650	Akenti_specific	Seawater_specific	Akenti_specific	70	12	71	48	3.94366	8.03239e-05	0.000575459	-1	mnmE, trmE, MSS1; tRNA modification GTPase [EC:3.6.-.-]
K07696	Akenti_specific	Seawater_specific	Akenti_specific	20	62	6	113	6.07527	8.05719e-05	0.000575459	14	nreC; two-component system, NarL family, response regulator NreC
K07277	Akenti_specific	Seawater_specific	Akenti_specific	70	12	71	48	3.94366	8.03239e-05	0.000575459	-1	SAM50, TOB55, bamA; outer membrane protein insertion porin family
K00925	Akenti_specific	Seawater_specific	Akenti_specific	34	48	19	100	3.72807	7.97223e-05	0.000573434	15	ackA; acetate kinase [EC:2.7.2.1]
K04568	Akenti_specific	Seawater_specific	Akenti_specific	28	54	13	106	4.22792	7.91142e-05	0.000569735	15	epmA, poxA; elongation factor P--(R)-beta-lysine ligase [EC:6.3.1.-]
K02258	Akenti_specific	Seawater_specific	Akenti_specific	38	44	23	96	3.60474	7.86492e-05	0.000567058	15	COX11, ctaG; cytochrome c oxidase assembly protein subunit 11
K09937	Akenti_specific	Seawater_specific	Akenti_specific	26	56	11	108	4.55844	7.75993e-05	0.000560153	15	K09937; uncharacterized protein
K15582	Akenti_specific	Seawater_specific	Akenti_specific	26	56	11	108	4.55844	7.75993e-05	0.000560153	15	oppC; oligopeptide transport system permease protein
K05527	Akenti_specific	Seawater_specific	Akenti_specific	41	41	27	92	3.40741	7.55519e-05	0.000546672	14	bolA; BolA family transcriptional regulator, general stress-responsive regulator
K02075	Akenti_specific	Seawater_specific	Seawater_specific	9	73	42	77	0.226027	7.17806e-05	0.000520003	-33	ABC.ZM.P; zinc/manganese transport system permease protein
K00283	Akenti_specific	Seawater_specific	Akenti_specific	24	58	9	110	5.05747	7.06971e-05	0.000512765	15	gcvPB; glycine dehydrogenase subunit 2 [EC:1.4.4.2]
K02406	Akenti_specific	Seawater_specific	Akenti_specific	37	45	22	97	3.62525	6.94338e-05	0.000504204	15	fliC; flagellin
K09117	Akenti_specific	Seawater_specific	Akenti_specific	64	18	60	59	3.4963	6.90271e-05	0.00050185	4	K09117; uncharacterized protein
K02527	Akenti_specific	Seawater_specific	Akenti_specific	64	18	60	59	3.4963	6.90271e-05	0.00050185	4	kdtA, waaA; 3-deoxy-D-manno-octulosonic-acid transferase [EC:2.4.99.12 2.4.99.13 2.4.99.14 2.4.99.15]
K13895	Akenti_specific	Seawater_specific	Akenti_specific	36	46	21	98	3.65217	6.45366e-05	0.000470328	15	yejE; microcin C transport system permease protein
K11381	Akenti_specific	Seawater_specific	Seawater_specific	7	75	38	81	0.198947	6.38906e-05	0.000466179	-31	bkdA; 2-oxoisovalerate dehydrogenase E1 component [EC:1.2.4.4]
K11418	Akenti_specific	Seawater_specific	Seawater_specific	14	68	53	66	0.256382	6.3279e-05	0.000462272	-39	HDAC11; histone deacetylase 11 [EC:3.5.1.98]
K01904	Akenti_specific	Seawater_specific	Seawater_specific	1	81	22	97	0.0544332	6.29827e-05	0.000460661	-21	4CL; 4-coumarate--CoA ligase [EC:6.2.1.12]
K05573	Akenti_specific	Seawater_specific	Seawater_specific	1	81	22	97	0.0544332	6.29827e-05	0.000460661	-21	ndhB; NAD(P)H-quinone oxidoreductase subunit 2 [EC:7.1.1.2]
K10256	Akenti_specific	Seawater_specific	Seawater_specific	0	82	18	101	0	6.04886e-05	0.000443486	-18	FAD2; omega-6 fatty acid desaturase / acyl-lipid omega-6 desaturase (Delta-12 desaturase) [EC:1.14.19.6 1.14.19.22]
K14728	Akenti_specific	Seawater_specific	Seawater_specific	0	82	18	101	0	6.04886e-05	0.000443486	-18	K14728; phthiodiolone/phenolphthiodiolone dimycocerosates ketoreductase [EC:1.2.-.-]
K11601	Akenti_specific	Seawater_specific	Seawater_specific	0	82	18	101	0	6.04886e-05	0.000443486	-18	mntC; manganese transport system substrate-binding protein
K05581	Akenti_specific	Seawater_specific	Seawater_specific	0	82	18	101	0	6.04886e-05	0.000443486	-18	ndhJ; NAD(P)H-quinone oxidoreductase subunit J [EC:7.1.1.2]
K05369	Akenti_specific	Seawater_specific	Seawater_specific	0	82	18	101	0	6.04886e-05	0.000443486	-18	pebA; 15,16-dihydrobiliverdin:ferredoxin oxidoreductase [EC:1.3.7.2]
K13421	Akenti_specific	Seawater_specific	Seawater_specific	0	82	18	101	0	6.04886e-05	0.000443486	-18	UMPS; uridine monophosphate synthetase [EC:2.4.2.10 4.1.1.23]
K09908	Akenti_specific	Seawater_specific	Akenti_specific	22	60	7	112	5.86667	5.78063e-05	0.000426909	15	K09908; uncharacterized protein
K07171	Akenti_specific	Seawater_specific	Akenti_specific	22	60	7	112	5.86667	5.78063e-05	0.000426909	15	mazF, ndoA, chpA; mRNA interferase MazF [EC:3.1.-.-]
K06879	Akenti_specific	Seawater_specific	Akenti_specific	22	60	7	112	5.86667	5.78063e-05	0.000426909	15	queF; 7-cyano-7-deazaguanine reductase [EC:1.7.1.13]
K01556	Akenti_specific	Seawater_specific	Seawater_specific	17	65	58	61	0.275066	5.62944e-05	0.000417265	-41	KYNU, kynU; kynureninase [EC:3.7.1.3]
K00525	Akenti_specific	Seawater_specific	Akenti_specific	78	4	88	31	6.86932	5.45378e-05	0.000404738	-10	E1.17.4.1A, nrdA, nrdE; ribonucleoside-diphosphate reductase alpha chain [EC:1.17.4.1]
K01012	Akenti_specific	Seawater_specific	Akenti_specific	57	25	48	71	3.3725	5.44319e-05	0.000404447	9	bioB; biotin synthase [EC:2.8.1.6]
K00242	Akenti_specific	Seawater_specific	Akenti_specific	44	38	30	89	3.43509	5.37336e-05	0.000399746	14	sdhD, frdD; succinate dehydrogenase / fumarate reductase, membrane anchor subunit
K01439	Akenti_specific	Seawater_specific	Akenti_specific	53	29	42	77	3.35057	5.31044e-05	0.000395813	11	dapE; succinyl-diaminopimelate desuccinylase [EC:3.5.1.18]
K11688	Akenti_specific	Seawater_specific	Akenti_specific	26	56	10	109	5.06071	5.31222e-05	0.000395813	16	dctP; C4-dicarboxylate-binding protein DctP
K09807	Akenti_specific	Seawater_specific	Akenti_specific	26	56	10	109	5.06071	5.31222e-05	0.000395813	16	K09807; uncharacterized protein
K02536	Akenti_specific	Seawater_specific	Akenti_specific	69	13	68	51	3.98077	5.31398e-05	0.000395813	1	lpxD; UDP-3-O-[3-hydroxymyristoyl] glucosamine N-acyltransferase [EC:2.3.1.191]
K05939	Akenti_specific	Seawater_specific	Akenti_specific	23	59	8	111	5.4089	5.28441e-05	0.00039555	15	aas; acyl-[acyl-carrier-protein]-phospholipid O-acyltransferase / long-chain-fatty-acid--[acyl-carrier-protein] ligase [EC:2.3.1.40 6.2.1.20]
K03774	Akenti_specific	Seawater_specific	Akenti_specific	23	59	8	111	5.4089	5.28441e-05	0.00039555	15	slpA; FKBP-type peptidyl-prolyl cis-trans isomerase SlpA [EC:5.2.1.8]
K09796	Akenti_specific	Seawater_specific	Akenti_specific	39	43	24	95	3.59012	5.24522e-05	0.000393586	15	pccA; periplasmic copper chaperone A
K00265	Akenti_specific	Seawater_specific	Akenti_specific	54	28	43	76	3.40864	5.12682e-05	0.000386823	11	gltB; glutamate synthase (NADPH) large chain [EC:1.4.1.13]
K00567	Akenti_specific	Seawater_specific	Akenti_specific	59	23	51	68	3.42029	5.14873e-05	0.000386823	8	ogt, MGMT; methylated-DNA-[protein]-cysteine S-methyltransferase [EC:2.1.1.63]
K02621	Akenti_specific	Seawater_specific	Akenti_specific	59	23	51	68	3.42029	5.14873e-05	0.000386823	8	parC; topoisomerase IV subunit A [EC:5.99.1.-]
K02622	Akenti_specific	Seawater_specific	Akenti_specific	59	23	51	68	3.42029	5.14873e-05	0.000386823	8	parE; topoisomerase IV subunit B [EC:5.99.1.-]
K03217	Akenti_specific	Seawater_specific	Akenti_specific	79	3	90	29	8.48519	5.14193e-05	0.000386823	-11	yidC, spoIIIJ, OXA1, ccfA; YidC/Oxa1 family membrane protein insertase
K01810	Akenti_specific	Seawater_specific	Akenti_specific	72	10	74	45	4.37838	4.98937e-05	0.000377182	-2	GPI, pgi; glucose-6-phosphate isomerase [EC:5.3.1.9]
K00874	Akenti_specific	Seawater_specific	Akenti_specific	36	46	20	99	3.87391	4.91374e-05	0.000371927	16	kdgK; 2-dehydro-3-deoxygluconokinase [EC:2.7.1.45]
K01139	Akenti_specific	Seawater_specific	Akenti_specific	36	46	20	99	3.87391	4.91374e-05	0.000371927	16	spoT; GTP diphosphokinase / guanosine-3',5'-bis(diphosphate) 3'-diphosphatase [EC:2.7.6.5 3.1.7.2]
K14261	Akenti_specific	Seawater_specific	Akenti_specific	30	52	14	105	4.32692	4.78968e-05	0.000363442	16	alaC; alanine-synthesizing transaminase [EC:2.6.1.-]
K09013	Akenti_specific	Seawater_specific	Seawater_specific	52	30	105	14	0.231111	4.78968e-05	0.000363442	-53	sufC; Fe-S cluster assembly ATP-binding protein
K02063	Akenti_specific	Seawater_specific	Seawater_specific	5	77	34	85	0.162338	4.77995e-05	0.000363442	-29	thiP; thiamine transport system permease protein
K00138	Akenti_specific	Seawater_specific	Akenti_specific	18	64	4	115	8.08594	4.54854e-05	0.000346442	14	aldB; aldehyde dehydrogenase [EC:1.2.1.-]
K02170	Akenti_specific	Seawater_specific	Akenti_specific	18	64	4	115	8.08594	4.54854e-05	0.000346442	14	bioH; pimeloyl-[acyl-carrier protein] methyl ester esterase [EC:3.1.1.85]
K15599	Akenti_specific	Seawater_specific	Akenti_specific	18	64	4	115	8.08594	4.54854e-05	0.000346442	14	thiX; putative hydroxymethylpyrimidine transport system permease protein
K06208	Akenti_specific	Seawater_specific	Seawater_specific	2	80	26	93	0.0894231	4.51245e-05	0.00034499	-24	aroH; chorismate mutase [EC:5.4.99.5]
K17245	Akenti_specific	Seawater_specific	Seawater_specific	2	80	26	93	0.0894231	4.51245e-05	0.00034499	-24	chiF; putative chitobiose transport system permease protein
K17246	Akenti_specific	Seawater_specific	Seawater_specific	2	80	26	93	0.0894231	4.51245e-05	0.00034499	-24	chiG; putative chitobiose transport system permease protein
K11779	Akenti_specific	Seawater_specific	Seawater_specific	2	80	26	93	0.0894231	4.51245e-05	0.00034499	-24	fbiC; FO synthase [EC:2.5.1.147 4.3.1.32]
K05578	Akenti_specific	Seawater_specific	Seawater_specific	2	80	26	93	0.0894231	4.51245e-05	0.00034499	-24	ndhG; NAD(P)H-quinone oxidoreductase subunit 6 [EC:7.1.1.2]
K13779	Akenti_specific	Seawater_specific	Akenti_specific	13	69	1	118	22.2319	4.35964e-05	0.000335417	12	atuE; isohexenylglutaconyl-CoA hydratase [EC:4.2.1.57]
K11443	Akenti_specific	Seawater_specific	Akenti_specific	13	69	1	118	22.2319	4.35964e-05	0.000335417	12	divK; two-component system, cell cycle response regulator DivK
K10819	Akenti_specific	Seawater_specific	Akenti_specific	13	69	1	118	22.2319	4.35964e-05	0.000335417	12	E2.7.13.3; histidine kinase [EC:2.7.13.3]
K07337	Akenti_specific	Seawater_specific	Akenti_specific	13	69	1	118	22.2319	4.35964e-05	0.000335417	12	K07337; penicillin-binding protein activator
K09977	Akenti_specific	Seawater_specific	Akenti_specific	13	69	1	118	22.2319	4.35964e-05	0.000335417	12	K09977; uncharacterized protein
K05020	Akenti_specific	Seawater_specific	Akenti_specific	13	69	1	118	22.2319	4.35964e-05	0.000335417	12	opuD, betL; glycine betaine transporter
K02282	Akenti_specific	Seawater_specific	Akenti_specific	17	65	3	116	10.1128	4.08906e-05	0.000317006	14	cpaE, tadZ; pilus assembly protein CpaE
K20975	Akenti_specific	Seawater_specific	Akenti_specific	17	65	3	116	10.1128	4.08906e-05	0.000317006	14	K20975; two-component system, sensor histidine kinase [EC:2.7.13.3]
K01486	Akenti_specific	Seawater_specific	Akenti_specific	20	62	5	114	7.35484	3.95172e-05	0.000307142	15	ade; adenine deaminase [EC:3.5.4.2]
K02494	Akenti_specific	Seawater_specific	Akenti_specific	20	62	5	114	7.35484	3.95172e-05	0.000307142	15	lolB; outer membrane lipoprotein LolB
K03578	Akenti_specific	Seawater_specific	Akenti_specific	34	48	18	101	3.97454	3.73794e-05	0.000291272	16	hrpA; ATP-dependent helicase HrpA [EC:3.6.4.13]
K00347	Akenti_specific	Seawater_specific	Akenti_specific	48	34	34	85	3.52941	3.72167e-05	0.000290376	14	nqrB; Na+-transporting NADH:ubiquinone oxidoreductase subunit B [EC:7.2.1.1]
K01572	Akenti_specific	Seawater_specific	Akenti_specific	21	61	6	113	6.48361	3.71851e-05	0.000290376	15	oadB; oxaloacetate decarboxylase, beta subunit [EC:4.1.1.112]
K05785	Akenti_specific	Seawater_specific	Akenti_specific	21	61	6	113	6.48361	3.71851e-05	0.000290376	15	rfaH; transcriptional antiterminator RfaH
K01919	Akenti_specific	Seawater_specific	Akenti_specific	46	36	32	87	3.47396	3.63192e-05	0.000284469	14	gshA; glutamate--cysteine ligase [EC:6.3.2.2]
K00349	Akenti_specific	Seawater_specific	Akenti_specific	47	35	33	86	3.49957	3.58853e-05	0.000281433	14	nqrD; Na+-transporting NADH:ubiquinone oxidoreductase subunit D [EC:7.2.1.1]
K00479	Akenti_specific	Seawater_specific	Seawater_specific	9	73	44	75	0.210149	3.58164e-05	0.000281256	-35	gbcA; glycine betaine catabolism A
K04763	Akenti_specific	Seawater_specific	Akenti_specific	73	9	75	44	4.75852	3.58164e-05	0.000281256	-2	xerD; integrase/recombinase XerD
K13953	Akenti_specific	Seawater_specific	Akenti_specific	25	57	9	110	5.36062	3.47975e-05	0.000273963	16	adhP; alcohol dehydrogenase, propanol-preferring [EC:1.1.1.1]
K10440	Akenti_specific	Seawater_specific	Akenti_specific	25	57	9	110	5.36062	3.47975e-05	0.000273963	16	rbsC; ribose transport system permease protein
K07462	Akenti_specific	Seawater_specific	Akenti_specific	71	11	71	48	4.36364	3.43313e-05	0.000270995	0	recJ; single-stranded-DNA-specific exonuclease [EC:3.1.-.-]
K03536	Akenti_specific	Seawater_specific	Akenti_specific	71	11	71	48	4.36364	3.43313e-05	0.000270995	0	rnpA; ribonuclease P protein component [EC:3.1.26.5]
K00394	Akenti_specific	Seawater_specific	Akenti_specific	11	71	0	119	inf	3.41325e-05	0.000270127	11	aprA; adenylylsulfate reductase, subunit A [EC:1.8.99.2]
K00395	Akenti_specific	Seawater_specific	Akenti_specific	11	71	0	119	inf	3.41325e-05	0.000270127	11	aprB; adenylylsulfate reductase, subunit B [EC:1.8.99.2]
K13776	Akenti_specific	Seawater_specific	Akenti_specific	11	71	0	119	inf	3.41325e-05	0.000270127	11	atuH; citronellyl-CoA synthetase [EC:6.2.1.-]
K16784	Akenti_specific	Seawater_specific	Akenti_specific	11	71	0	119	inf	3.41325e-05	0.000270127	11	bioM; biotin transport system ATP-binding protein [EC:3.6.3.-]
K03409	Akenti_specific	Seawater_specific	Akenti_specific	11	71	0	119	inf	3.41325e-05	0.000270127	11	cheX; chemotaxis protein CheX
K07321	Akenti_specific	Seawater_specific	Akenti_specific	11	71	0	119	inf	3.41325e-05	0.000270127	11	cooC; CO dehydrogenase maturation factor
K07644	Akenti_specific	Seawater_specific	Akenti_specific	11	71	0	119	inf	3.41325e-05	0.000270127	11	cusS, copS, silS; two-component system, OmpR family, heavy metal sensor histidine kinase CusS [EC:2.7.13.3]
K05919	Akenti_specific	Seawater_specific	Akenti_specific	11	71	0	119	inf	3.41325e-05	0.000270127	11	dfx; superoxide reductase [EC:1.15.1.2]
K02463	Akenti_specific	Seawater_specific	Akenti_specific	11	71	0	119	inf	3.41325e-05	0.000270127	11	gspN; general secretion pathway protein N
K11903	Akenti_specific	Seawater_specific	Akenti_specific	11	71	0	119	inf	3.41325e-05	0.000270127	11	hcp; type VI secretion system secreted protein Hcp
K11893	Akenti_specific	Seawater_specific	Akenti_specific	11	71	0	119	inf	3.41325e-05	0.000270127	11	impJ, vasE; type VI secretion system protein ImpJ
K06905	Akenti_specific	Seawater_specific	Akenti_specific	11	71	0	119	inf	3.41325e-05	0.000270127	11	K06905; uncharacterized protein
K06908	Akenti_specific	Seawater_specific	Akenti_specific	11	71	0	119	inf	3.41325e-05	0.000270127	11	K06908; uncharacterized protein
K06921	Akenti_specific	Seawater_specific	Akenti_specific	11	71	0	119	inf	3.41325e-05	0.000270127	11	K06921; uncharacterized protein
K07338	Akenti_specific	Seawater_specific	Akenti_specific	11	71	0	119	inf	3.41325e-05	0.000270127	11	K07338; uncharacterized protein
K13819	Akenti_specific	Seawater_specific	Akenti_specific	11	71	0	119	inf	3.41325e-05	0.000270127	11	K13819; NifU-like protein
K07173	Akenti_specific	Seawater_specific	Akenti_specific	11	71	0	119	inf	3.41325e-05	0.000270127	11	luxS; S-ribosylhomocysteine lyase [EC:4.4.1.21]
K03923	Akenti_specific	Seawater_specific	Akenti_specific	11	71	0	119	inf	3.41325e-05	0.000270127	11	mdaB; modulator of drug activity B
K02567	Akenti_specific	Seawater_specific	Akenti_specific	11	71	0	119	inf	3.41325e-05	0.000270127	11	napA; periplasmic nitrate reductase NapA [EC:1.7.99.-]
K07183	Akenti_specific	Seawater_specific	Akenti_specific	11	71	0	119	inf	3.41325e-05	0.000270127	11	nasT; two-component system, response regulator / RNA-binding antiterminator
K17838	Akenti_specific	Seawater_specific	Akenti_specific	11	71	0	119	inf	3.41325e-05	0.000270127	11	oxa; beta-lactamase class D [EC:3.5.2.6]
K07645	Akenti_specific	Seawater_specific	Akenti_specific	11	71	0	119	inf	3.41325e-05	0.000270127	11	qseC; two-component system, OmpR family, sensor histidine kinase QseC [EC:2.7.13.3]
K03837	Akenti_specific	Seawater_specific	Akenti_specific	11	71	0	119	inf	3.41325e-05	0.000270127	11	sdaC; serine transporter
K03424	Akenti_specific	Seawater_specific	Akenti_specific	81	1	96	23	19.4062	3.31373e-05	0.000270127	-15	tatD; TatD DNase family protein [EC:3.1.21.-]
K09181	Akenti_specific	Seawater_specific	Akenti_specific	11	71	0	119	inf	3.41325e-05	0.000270127	11	yfiQ; acetyltransferase
K03219	Akenti_specific	Seawater_specific	Akenti_specific	11	71	0	119	inf	3.41325e-05	0.000270127	11	yscC, sctC, ssaC; type III secretion protein C
K00514	Akenti_specific	Seawater_specific	Seawater_specific	1	81	23	96	0.0515298	3.31373e-05	0.000270127	-22	ZDS, crtQ; zeta-carotene desaturase [EC:1.3.5.6]
K02284	Akenti_specific	Seawater_specific	Seawater_specific	0	82	19	100	0	3.10785e-05	0.000254919	-19	cpcA; phycocyanin alpha chain
K13071	Akenti_specific	Seawater_specific	Seawater_specific	0	82	19	100	0	3.10785e-05	0.000254919	-19	PAO, ACD1; pheophorbide a oxygenase [EC:1.14.15.17]
K04035	Akenti_specific	Seawater_specific	Seawater_specific	4	78	32	87	0.139423	3.06717e-05	0.000252263	-28	E1.14.13.81, acsF, chlE; magnesium-protoporphyrin IX monomethyl ester (oxidative) cyclase [EC:1.14.13.81]
K00990	Akenti_specific	Seawater_specific	Akenti_specific	55	27	44	75	3.47222	3.06098e-05	0.000252095	11	glnD; [protein-PII] uridylyltransferase [EC:2.7.7.59]
K12297	Akenti_specific	Seawater_specific	Akenti_specific	23	59	7	112	6.23729	2.81641e-05	0.000232268	16	rlmL, rlmK; 23S rRNA (guanine2445-N2)-methyltransferase / 23S rRNA (guanine2069-N7)-methyltransferase [EC:2.1.1.173 2.1.1.264]
K00647	Akenti_specific	Seawater_specific	Akenti_specific	44	38	29	90	3.59347	2.7854e-05	0.000230022	15	fabB; 3-oxoacyl-[acyl-carrier-protein] synthase I [EC:2.3.1.41]
K03771	Akenti_specific	Seawater_specific	Akenti_specific	58	24	48	71	3.57465	2.74308e-05	0.000226836	10	surA; peptidyl-prolyl cis-trans isomerase SurA [EC:5.2.1.8]
K00528	Akenti_specific	Seawater_specific	Akenti_specific	40	42	24	95	3.76984	2.71999e-05	0.000225233	16	fpr; ferredoxin/flavodoxin---NADP+ reductase [EC:1.18.1.2 1.19.1.1]
K00566	Akenti_specific	Seawater_specific	Akenti_specific	79	3	89	30	8.8764	2.70728e-05	0.000224486	-10	mnmA, trmU; tRNA-uridine 2-sulfurtransferase [EC:2.8.1.13]
K03386	Akenti_specific	Seawater_specific	Akenti_specific	74	8	77	42	5.04545	2.70285e-05	0.000224425	-3	PRDX2_4, ahpC; peroxiredoxin (alkyl hydroperoxide reductase subunit C) [EC:1.11.1.15]
K02064	Akenti_specific	Seawater_specific	Seawater_specific	5	77	35	84	0.155844	2.65334e-05	0.000220615	-30	thiB, tbpA; thiamine transport system substrate-binding protein
K00266	Akenti_specific	Seawater_specific	Akenti_specific	61	21	53	66	3.61725	2.64299e-05	0.000220056	8	gltD; glutamate synthase (NADPH) small chain [EC:1.4.1.13]
K07091	Akenti_specific	Seawater_specific	Akenti_specific	61	21	53	66	3.61725	2.64299e-05	0.000220056	8	lptF; lipopolysaccharide export system permease protein
K03724	Akenti_specific	Seawater_specific	Seawater_specific	22	60	68	51	0.275	2.54711e-05	0.000212655	-46	lhr; ATP-dependent helicase Lhr and Lhr-like helicase [EC:3.6.4.-]
K02457	Akenti_specific	Seawater_specific	Akenti_specific	24	58	8	111	5.74138	2.47878e-05	0.000207236	16	gspH; general secretion pathway protein H
K09920	Akenti_specific	Seawater_specific	Akenti_specific	24	58	8	111	5.74138	2.47878e-05	0.000207236	16	K09920; uncharacterized protein
K15984	Akenti_specific	Seawater_specific	Akenti_specific	24	58	8	111	5.74138	2.47878e-05	0.000207236	16	rsmJ; 16S rRNA (guanine1516-N2)-methyltransferase [EC:2.1.1.242]
K01641	Akenti_specific	Seawater_specific	Seawater_specific	2	80	27	92	0.0851852	2.39086e-05	0.000200714	-25	E2.3.3.10; hydroxymethylglutaryl-CoA synthase [EC:2.3.3.10]
K03070	Akenti_specific	Seawater_specific	Akenti_specific	80	2	92	27	11.7391	2.39086e-05	0.000200714	-12	secA; preprotein translocase subunit SecA
K03090	Akenti_specific	Seawater_specific	Seawater_specific	2	80	27	92	0.0851852	2.39086e-05	0.000200714	-25	sigB; RNA polymerase sigma-B factor
K05356	Akenti_specific	Seawater_specific	Seawater_specific	2	80	27	92	0.0851852	2.39086e-05	0.000200714	-25	SPS, sds; all-trans-nonaprenyl-diphosphate synthase [EC:2.5.1.84 2.5.1.85]
K09012	Akenti_specific	Seawater_specific	Seawater_specific	2	80	27	92	0.0851852	2.39086e-05	0.000200714	-25	sufR; DeoR family transcriptional regulator, suf operon transcriptional repressor
K04088	Akenti_specific	Seawater_specific	Akenti_specific	49	33	35	84	3.56364	2.27849e-05	0.00019261	14	hflK; membrane protease subunit HflK [EC:3.4.-.-]
K01894	Akenti_specific	Seawater_specific	Akenti_specific	43	39	27	92	3.75689	2.0662e-05	0.000174907	16	gluQ; glutamyl-Q tRNA(Asp) synthetase [EC:6.1.1.-]
K05591	Akenti_specific	Seawater_specific	Akenti_specific	19	63	4	115	8.67063	1.99922e-05	0.000169473	15	dbpA; ATP-independent RNA helicase DbpA [EC:3.6.4.13]
K02450	Akenti_specific	Seawater_specific	Akenti_specific	19	63	4	115	8.67063	1.99922e-05	0.000169473	15	gspA; general secretion pathway protein A
K04044	Akenti_specific	Seawater_specific	Akenti_specific	19	63	4	115	8.67063	1.99922e-05	0.000169473	15	hscA; molecular chaperone HscA
K02823	Akenti_specific	Seawater_specific	Akenti_specific	19	63	4	115	8.67063	1.99922e-05	0.000169473	15	pyrDII; dihydroorotate dehydrogenase electron transfer subunit
K03812	Akenti_specific	Seawater_specific	Akenti_specific	19	63	4	115	8.67063	1.99922e-05	0.000169473	15	rmf; ribosome modulation factor
K03313	Akenti_specific	Seawater_specific	Akenti_specific	30	52	13	106	4.70414	1.93405e-05	0.000165101	17	nhaA; Na+:H+ antiporter, NhaA family
K00128	Akenti_specific	Seawater_specific	Seawater_specific	43	39	97	22	0.250066	1.92801e-05	0.000164817	-54	ALDH; aldehyde dehydrogenase (NAD+) [EC:1.2.1.3]
K06991	Akenti_specific	Seawater_specific	Seawater_specific	11	71	49	70	0.221328	1.9174e-05	0.00016414	-38	K06991; uncharacterized protein
K16872	Akenti_specific	Seawater_specific	Akenti_specific	21	61	5	114	7.84918	1.89375e-05	0.000162344	16	E2.3.1.207; beta-ketodecanoyl-[acyl-carrier-protein] synthase [EC:2.3.1.207]
K05825	Akenti_specific	Seawater_specific	Akenti_specific	28	54	11	108	5.09091	1.88613e-05	0.00016192	17	LYSN; 2-aminoadipate transaminase [EC:2.6.1.-]
K15580	Akenti_specific	Seawater_specific	Akenti_specific	28	54	11	108	5.09091	1.88613e-05	0.00016192	17	oppA, mppA; oligopeptide transport system substrate-binding protein
K15581	Akenti_specific	Seawater_specific	Akenti_specific	28	54	11	108	5.09091	1.88613e-05	0.00016192	17	oppB; oligopeptide transport system permease protein
K21019	Akenti_specific	Seawater_specific	Akenti_specific	18	64	3	116	10.875	1.88138e-05	0.00016192	15	sadC; diguanylate cyclase [EC:2.7.7.65]
K02416	Akenti_specific	Seawater_specific	Akenti_specific	35	47	18	101	4.17849	1.87398e-05	0.00016179	17	fliM; flagellar motor switch protein FliM
K06189	Akenti_specific	Seawater_specific	Akenti_specific	48	34	33	86	3.67914	1.86985e-05	0.000161735	15	corC; magnesium and cobalt transporter
K00208	Akenti_specific	Seawater_specific	Seawater_specific	50	32	104	15	0.225361	1.87068e-05	0.000161735	-54	fabI; enoyl-[acyl-carrier protein] reductase I [EC:1.3.1.9 1.3.1.10]
K02020	Akenti_specific	Seawater_specific	Akenti_specific	48	34	33	86	3.67914	1.86985e-05	0.000161735	15	modA; molybdate transport system substrate-binding protein
K00351	Akenti_specific	Seawater_specific	Akenti_specific	48	34	33	86	3.67914	1.86985e-05	0.000161735	15	nqrF; Na+-transporting NADH:ubiquinone oxidoreductase subunit F [EC:7.2.1.1]
K00005	Akenti_specific	Seawater_specific	Seawater_specific	1	81	24	95	0.0488683	1.75584e-05	0.000152675	-23	gldA; glycerol dehydrogenase [EC:1.1.1.6]
K00367	Akenti_specific	Seawater_specific	Seawater_specific	1	81	24	95	0.0488683	1.75584e-05	0.000152675	-23	narB; ferredoxin-nitrate reductase [EC:1.7.7.2]
K02293	Akenti_specific	Seawater_specific	Seawater_specific	1	81	24	95	0.0488683	1.75584e-05	0.000152675	-23	PDS, crtP; 15-cis-phytoene desaturase [EC:1.3.5.5]
K18678	Akenti_specific	Seawater_specific	Seawater_specific	1	81	24	95	0.0488683	1.75584e-05	0.000152675	-23	VTE5; phytol kinase [EC:2.7.1.182]
K11901	Akenti_specific	Seawater_specific	Akenti_specific	14	68	1	118	24.2941	1.71804e-05	0.000150249	13	impB; type VI secretion system protein ImpB
K06378	Akenti_specific	Seawater_specific	Akenti_specific	14	68	1	118	24.2941	1.71804e-05	0.000150249	13	spoIIAA; stage II sporulation protein AA (anti-sigma F factor antagonist)
K03557	Akenti_specific	Seawater_specific	Akenti_specific	26	56	9	110	5.6746	1.70179e-05	0.000149257	17	fis; Fis family transcriptional regulator, factor for inversion stimulation protein
K02441	Akenti_specific	Seawater_specific	Akenti_specific	26	56	9	110	5.6746	1.70179e-05	0.000149257	17	glpG; GlpG protein
K07727	Akenti_specific	Seawater_specific	Akenti_specific	26	56	9	110	5.6746	1.70179e-05	0.000149257	17	K07727; putative transcriptional regulator
K06919	Akenti_specific	Seawater_specific	Akenti_specific	22	60	6	113	6.90556	1.69392e-05	0.000149212	16	K06919; putative DNA primase/helicase
K03808	Akenti_specific	Seawater_specific	Akenti_specific	22	60	6	113	6.90556	1.69392e-05	0.000149212	16	pqiA; paraquat-inducible protein A
K02844	Akenti_specific	Seawater_specific	Akenti_specific	22	60	6	113	6.90556	1.69392e-05	0.000149212	16	waaG, rfaG; UDP-glucose:(heptosyl)LPS alpha-1,3-glucosyltransferase [EC:2.4.1.-]
K19190	Akenti_specific	Seawater_specific	Seawater_specific	0	82	20	99	0	1.61288e-05	0.000142694	-20	nboR; nicotine blue oxidoreductase [EC:1.1.1.328]
K02689	Akenti_specific	Seawater_specific	Seawater_specific	0	82	20	99	0	1.61288e-05	0.000142694	-20	psaA; photosystem I P700 chlorophyll a apoprotein A1
K00850	Akenti_specific	Seawater_specific	Akenti_specific	37	45	20	99	4.07	1.57098e-05	0.000139393	17	pfkA, PFK; 6-phosphofructokinase 1 [EC:2.7.1.11]
K13893	Akenti_specific	Seawater_specific	Akenti_specific	37	45	20	99	4.07	1.57098e-05	0.000139393	17	yejA; microcin C transport system substrate-binding protein
K07662	Akenti_specific	Seawater_specific	Akenti_specific	16	66	2	117	14.1818	1.53056e-05	0.000136204	14	cpxR; two-component system, OmpR family, response regulator CpxR
K03749	Akenti_specific	Seawater_specific	Akenti_specific	16	66	2	117	14.1818	1.53056e-05	0.000136204	14	dedD; DedD protein
K03746	Akenti_specific	Seawater_specific	Akenti_specific	16	66	2	117	14.1818	1.53056e-05	0.000136204	14	hns; DNA-binding protein H-NS
K00563	Akenti_specific	Seawater_specific	Akenti_specific	16	66	2	117	14.1818	1.53056e-05	0.000136204	14	rlmA1; 23S rRNA (guanine745-N1)-methyltransferase [EC:2.1.1.187]
K06077	Akenti_specific	Seawater_specific	Akenti_specific	16	66	2	117	14.1818	1.53056e-05	0.000136204	14	slyB; outer membrane lipoprotein SlyB
K02520	Akenti_specific	Seawater_specific	Akenti_specific	74	8	76	43	5.23355	1.51873e-05	0.000136148	-2	infC, MTIF3; translation initiation factor IF-3
K03770	Akenti_specific	Seawater_specific	Akenti_specific	54	28	41	78	3.66899	1.45751e-05	0.000130853	13	ppiD; peptidyl-prolyl cis-trans isomerase D [EC:5.2.1.8]
K00362	Akenti_specific	Seawater_specific	Akenti_specific	27	55	10	109	5.35091	1.44849e-05	0.000130235	17	nirB; nitrite reductase (NADH) large subunit [EC:1.7.1.15]
K15396	Akenti_specific	Seawater_specific	Akenti_specific	27	55	10	109	5.35091	1.44849e-05	0.000130235	17	trmJ; tRNA (cytidine32/uridine32-2'-O)-methyltransferase [EC:2.1.1.200]
K07340	Akenti_specific	Seawater_specific	Akenti_specific	27	55	10	109	5.35091	1.44849e-05	0.000130235	17	ybbJ; inner membrane protein
K07058	Akenti_specific	Seawater_specific	Akenti_specific	51	31	37	82	3.64603	1.42188e-05	0.000128413	14	K07058; membrane protein
K12542	Akenti_specific	Seawater_specific	Akenti_specific	24	58	7	112	6.62069	1.36988e-05	0.000123901	17	lapC; membrane fusion protein, adhesin transport system
K02517	Akenti_specific	Seawater_specific	Akenti_specific	59	23	48	71	3.79438	1.36028e-05	0.000123216	11	lpxL, htrB; Kdo2-lipid IVA lauroyltransferase [EC:2.3.1.241]
K04761	Akenti_specific	Seawater_specific	Akenti_specific	52	30	38	81	3.69474	1.33012e-05	0.000120664	14	oxyR; LysR family transcriptional regulator, hydrogen peroxide-inducible genes activator
K01886	Akenti_specific	Seawater_specific	Akenti_specific	53	29	39	80	3.74889	1.30793e-05	0.000118828	14	QARS, glnS; glutaminyl-tRNA synthetase [EC:6.1.1.18]
K08218	Akenti_specific	Seawater_specific	Akenti_specific	40	42	23	96	3.97516	1.30363e-05	0.000118615	17	ampG; MFS transporter, PAT family, beta-lactamase induction signal transducer AmpG
K04072	Akenti_specific	Seawater_specific	Akenti_specific	12	70	0	119	inf	1.27548e-05	0.000116227	12	adhE; acetaldehyde dehydrogenase / alcohol dehydrogenase [EC:1.2.1.10 1.1.1.1]
K05807	Akenti_specific	Seawater_specific	Akenti_specific	61	21	51	68	3.87302	1.23762e-05	0.000116227	10	bamD; outer membrane protein assembly factor BamD
K02190	Akenti_specific	Seawater_specific	Akenti_specific	12	70	0	119	inf	1.27548e-05	0.000116227	12	cbiK; sirohydrochlorin cobaltochelatase [EC:4.99.1.3]
K17733	Akenti_specific	Seawater_specific	Akenti_specific	12	70	0	119	inf	1.27548e-05	0.000116227	12	cwlK; peptidoglycan LD-endopeptidase CwlK [EC:3.4.-.-]
K15836	Akenti_specific	Seawater_specific	Akenti_specific	12	70	0	119	inf	1.27548e-05	0.000116227	12	fhlA; formate hydrogenlyase transcriptional activator
K07749	Akenti_specific	Seawater_specific	Seawater_specific	20	62	66	53	0.259042	1.23568e-05	0.000116227	-46	frc; formyl-CoA transferase [EC:2.8.3.16]
K20265	Akenti_specific	Seawater_specific	Akenti_specific	12	70	0	119	inf	1.27548e-05	0.000116227	12	gadC; glutamate:GABA antiporter
K00112	Akenti_specific	Seawater_specific	Akenti_specific	12	70	0	119	inf	1.27548e-05	0.000116227	12	glpB; glycerol-3-phosphate dehydrogenase subunit B [EC:1.1.5.3]
K06996	Akenti_specific	Seawater_specific	Akenti_specific	32	50	14	105	4.8	1.24483e-05	0.000116227	18	K06996; uncharacterized protein
K08988	Akenti_specific	Seawater_specific	Akenti_specific	12	70	0	119	inf	1.27548e-05	0.000116227	12	K08988; putative membrane protein
K02071	Akenti_specific	Seawater_specific	Akenti_specific	12	70	0	119	inf	1.27548e-05	0.000116227	12	metN; D-methionine transport system ATP-binding protein
K02073	Akenti_specific	Seawater_specific	Akenti_specific	12	70	0	119	inf	1.27548e-05	0.000116227	12	metQ; D-methionine transport system substrate-binding protein
K18301	Akenti_specific	Seawater_specific	Akenti_specific	12	70	0	119	inf	1.27548e-05	0.000116227	12	mexL; TetR/AcrR family transcriptional regulator, mexJK operon transcriptional repressor
K07132	Akenti_specific	Seawater_specific	Akenti_specific	12	70	0	119	inf	1.27548e-05	0.000116227	12	MuB; ATP-dependent target DNA activator [EC:3.6.1.3]
K02585	Akenti_specific	Seawater_specific	Akenti_specific	12	70	0	119	inf	1.27548e-05	0.000116227	12	nifB; nitrogen fixation protein NifB
K02588	Akenti_specific	Seawater_specific	Akenti_specific	12	70	0	119	inf	1.27548e-05	0.000116227	12	nifH; nitrogenase iron protein NifH
K12264	Akenti_specific	Seawater_specific	Akenti_specific	12	70	0	119	inf	1.27548e-05	0.000116227	12	norV; anaerobic nitric oxide reductase flavorubredoxin
K06402	Akenti_specific	Seawater_specific	Seawater_specific	2	80	28	91	0.08125	1.27405e-05	0.000116227	-26	spoIVFB; stage IV sporulation protein FB [EC:3.4.24.-]
K05590	Akenti_specific	Seawater_specific	Akenti_specific	12	70	0	119	inf	1.27548e-05	0.000116227	12	srmB; ATP-dependent RNA helicase SrmB [EC:3.6.4.13]
K08978	Akenti_specific	Seawater_specific	Akenti_specific	12	70	0	119	inf	1.27548e-05	0.000116227	12	TC.BAT1; bacterial/archaeal transporter family protein
K03328	Akenti_specific	Seawater_specific	Akenti_specific	12	70	0	119	inf	1.27548e-05	0.000116227	12	TC.PST; polysaccharide transporter, PST family
K03834	Akenti_specific	Seawater_specific	Akenti_specific	12	70	0	119	inf	1.27548e-05	0.000116227	12	tyrP; tyrosine-specific transport protein
K03222	Akenti_specific	Seawater_specific	Akenti_specific	12	70	0	119	inf	1.27548e-05	0.000116227	12	yscJ, sctJ, hrcJ, ssaJ; type III secretion protein J
K03223	Akenti_specific	Seawater_specific	Akenti_specific	12	70	0	119	inf	1.27548e-05	0.000116227	12	yscL, sctL; type III secretion protein L
K03224	Akenti_specific	Seawater_specific	Akenti_specific	12	70	0	119	inf	1.27548e-05	0.000116227	12	yscN, sctN, hrcN, ssaN; ATP synthase in type III secretion protein N [EC:7.1.2.2]
K03226	Akenti_specific	Seawater_specific	Akenti_specific	12	70	0	119	inf	1.27548e-05	0.000116227	12	yscR, sctR, hrcR, ssaR; type III secretion protein R
K03227	Akenti_specific	Seawater_specific	Akenti_specific	12	70	0	119	inf	1.27548e-05	0.000116227	12	yscS, sctS, hrcS, ssaS; type III secretion protein S
K03228	Akenti_specific	Seawater_specific	Akenti_specific	12	70	0	119	inf	1.27548e-05	0.000116227	12	yscT, sctT, hrcT, ssaT; type III secretion protein T
K03229	Akenti_specific	Seawater_specific	Akenti_specific	12	70	0	119	inf	1.27548e-05	0.000116227	12	yscU, sctU, hrcU, ssaU; type III secretion protein U
K03230	Akenti_specific	Seawater_specific	Akenti_specific	12	70	0	119	inf	1.27548e-05	0.000116227	12	yscV, sctV, hrcV, ssaV, invA; type III secretion protein V
K03309	Akenti_specific	Seawater_specific	Akenti_specific	51	31	36	83	3.79301	1.15784e-05	0.000110477	15	TC.DAACS; dicarboxylate/amino acid:cation (Na+ or H+) symporter, DAACS family
K04087	Akenti_specific	Seawater_specific	Akenti_specific	50	32	35	84	3.75	1.14758e-05	0.000109669	15	hflC; membrane protease subunit HflC [EC:3.4.-.-]
K07153	Akenti_specific	Seawater_specific	Akenti_specific	25	57	8	111	6.08553	1.14721e-05	0.000109669	17	hflD; high frequency lysogenization protein
K05501	Akenti_specific	Seawater_specific	Akenti_specific	25	57	8	111	6.08553	1.14721e-05	0.000109669	17	slmA, ttk; TetR/AcrR family transcriptional regulator
K11744	Akenti_specific	Seawater_specific	Akenti_specific	25	57	8	111	6.08553	1.14721e-05	0.000109669	17	tqsA; AI-2 transport protein TqsA
K18800	Akenti_specific	Seawater_specific	Akenti_specific	25	57	8	111	6.08553	1.14721e-05	0.000109669	17	ubiI; 2-polyprenylphenol 6-hydroxylase [EC:1.14.13.240]
K06203	Akenti_specific	Seawater_specific	Akenti_specific	37	45	19	100	4.32749	1.10552e-05	0.000106487	18	cysZ; CysZ protein
K02662	Akenti_specific	Seawater_specific	Akenti_specific	34	48	16	103	4.5599	1.09059e-05	0.000105216	18	pilM; type IV pilus assembly protein PilM
K00499	Akenti_specific	Seawater_specific	Seawater_specific	9	73	46	73	0.195652	1.07991e-05	0.000104351	-37	CMO; choline monooxygenase [EC:1.14.15.7]
K03071	Akenti_specific	Seawater_specific	Akenti_specific	44	38	27	92	3.94542	1.06349e-05	0.000102929	17	secB; preprotein translocase subunit SecB
K03210	Akenti_specific	Seawater_specific	Akenti_specific	68	14	63	56	4.31746	1.04984e-05	0.00010177	5	yajC; preprotein translocase subunit YajC
K03119	Akenti_specific	Seawater_specific	Seawater_specific	7	75	42	77	0.171111	9.55767e-06	9.2798e-05	-35	tauD; taurine dioxygenase [EC:1.14.11.17]
K00412	Akenti_specific	Seawater_specific	Akenti_specific	47	35	31	88	3.81198	9.49562e-06	9.2343e-05	16	CYTB, petB; ubiquinol-cytochrome c reductase cytochrome b subunit
K00348	Akenti_specific	Seawater_specific	Akenti_specific	47	35	31	88	3.81198	9.49562e-06	9.2343e-05	16	nqrC; Na+-transporting NADH:ubiquinone oxidoreductase subunit C [EC:7.2.1.1]
K07038	Akenti_specific	Seawater_specific	Akenti_specific	31	51	13	106	4.95626	9.39109e-06	9.16197e-05	18	K07038; inner membrane protein
K03832	Akenti_specific	Seawater_specific	Akenti_specific	48	34	32	87	3.83824	9.31287e-06	9.10026e-05	16	tonB; periplasmic protein TonB
K03563	Akenti_specific	Seawater_specific	Akenti_specific	36	46	18	101	4.3913	9.27887e-06	9.08164e-05	18	csrA; carbon storage regulator
K09798	Akenti_specific	Seawater_specific	Akenti_specific	29	53	11	108	5.37221	9.18062e-06	8.99997e-05	18	K09798; uncharacterized protein
K02635	Akenti_specific	Seawater_specific	Seawater_specific	1	81	26	93	0.0441595	9.11e-06	8.94517e-05	-25	petB; cytochrome b6
K01591	Akenti_specific	Seawater_specific	Akenti_specific	81	1	93	26	22.6452	9.11e-06	8.94517e-05	-12	pyrF; orotidine-5'-phosphate decarboxylase [EC:4.1.1.23]
K15226	Akenti_specific	Seawater_specific	Seawater_specific	1	81	26	93	0.0441595	9.11e-06	8.94517e-05	-25	tyrAa; arogenate dehydrogenase (NADP+) [EC:1.3.1.78]
K05541	Akenti_specific	Seawater_specific	Akenti_specific	20	62	4	115	9.27419	8.69127e-06	8.59797e-05	16	dusC; tRNA-dihydrouridine synthase C [EC:1.-.-.-]
K02398	Akenti_specific	Seawater_specific	Akenti_specific	19	63	3	116	11.6614	8.71396e-06	8.59797e-05	16	flgM; negative regulator of flagellin synthesis FlgM
K06915	Akenti_specific	Seawater_specific	Akenti_specific	20	62	4	115	9.27419	8.69127e-06	8.59797e-05	16	K06915; uncharacterized protein
K09954	Akenti_specific	Seawater_specific	Akenti_specific	19	63	3	116	11.6614	8.71396e-06	8.59797e-05	16	K09954; uncharacterized protein
K15539	Akenti_specific	Seawater_specific	Akenti_specific	19	63	3	116	11.6614	8.71396e-06	8.59797e-05	16	rodZ; cytoskeleton protein RodZ
K05377	Akenti_specific	Seawater_specific	Seawater_specific	0	82	21	98	0	8.43936e-06	8.39516e-05	-21	cpeB, mpeB; phycoerythrin beta chain
K00870	Akenti_specific	Seawater_specific	Seawater_specific	0	82	21	98	0	8.43936e-06	8.39516e-05	-21	E2.7.1.37; protein kinase [EC:2.7.1.37]
K11603	Akenti_specific	Seawater_specific	Seawater_specific	0	82	21	98	0	8.43936e-06	8.39516e-05	-21	mntA; manganese transport system ATP-binding protein
K11602	Akenti_specific	Seawater_specific	Seawater_specific	0	82	21	98	0	8.43936e-06	8.39516e-05	-21	mntB; manganese transport system permease protein
K02700	Akenti_specific	Seawater_specific	Seawater_specific	0	82	21	98	0	8.43936e-06	8.39516e-05	-21	psaM; photosystem I subunit XII
K02717	Akenti_specific	Seawater_specific	Seawater_specific	0	82	21	98	0	8.43936e-06	8.39516e-05	-21	psbP; photosystem II oxygen-evolving enhancer protein 2
K15744	Akenti_specific	Seawater_specific	Seawater_specific	0	82	21	98	0	8.43936e-06	8.39516e-05	-21	Z-ISO; zeta-carotene isomerase [EC:5.2.1.12]
K00029	Akenti_specific	Seawater_specific	Akenti_specific	58	24	46	73	3.83514	8.10313e-06	8.15411e-05	12	E1.1.1.40, maeB; malate dehydrogenase (oxaloacetate-decarboxylating)(NADP+) [EC:1.1.1.40]
K02014	Akenti_specific	Seawater_specific	Akenti_specific	54	28	40	79	3.80893	7.71279e-06	7.77419e-05	14	TC.FEV.OM; iron complex outermembrane recepter protein
K10680	Akenti_specific	Seawater_specific	Akenti_specific	30	52	12	107	5.14423	7.65827e-06	7.73206e-05	18	nemA; N-ethylmaleimide reductase [EC:1.-.-.-]
K01839	Akenti_specific	Seawater_specific	Akenti_specific	23	59	6	113	7.34181	7.63464e-06	7.72103e-05	17	deoB; phosphopentomutase [EC:5.4.2.7]
K01594	Akenti_specific	Seawater_specific	Seawater_specific	3	79	32	87	0.103244	7.60686e-06	7.70575e-05	-29	CSAD; sulfinoalanine decarboxylase [EC:4.1.1.29]
K03810	Akenti_specific	Seawater_specific	Seawater_specific	3	79	32	87	0.103244	7.60686e-06	7.70575e-05	-29	mviM; virulence factor
K04518	Akenti_specific	Seawater_specific	Seawater_specific	25	57	75	44	0.25731	7.36666e-06	7.48738e-05	-50	pheA2; prephenate dehydratase [EC:4.2.1.51]
K04764	Akenti_specific	Seawater_specific	Akenti_specific	45	37	28	91	3.9527	7.01227e-06	7.13912e-05	17	ihfA, himA; integration host factor subunit alpha
K03809	Akenti_specific	Seawater_specific	Akenti_specific	28	54	10	109	5.65185	6.72892e-06	6.86214e-05	18	wrbA; NAD(P)H dehydrogenase (quinone) [EC:1.6.5.2]
K07798	Akenti_specific	Seawater_specific	Akenti_specific	15	67	1	118	26.4179	6.681e-06	6.82473e-05	14	cusB, silB; membrane fusion protein, Cu(I)/Ag(I) efflux system
K04084	Akenti_specific	Seawater_specific	Akenti_specific	53	29	38	81	3.89564	6.59285e-06	6.82473e-05	15	dsbD; thiol:disulfide interchange protein DsbD [EC:1.8.1.8]
K06603	Akenti_specific	Seawater_specific	Akenti_specific	15	67	1	118	26.4179	6.681e-06	6.82473e-05	14	flaG; flagellar protein FlaG
K02521	Akenti_specific	Seawater_specific	Akenti_specific	25	57	7	112	7.01754	6.67357e-06	6.82473e-05	18	ilvY; LysR family transcriptional regulator, positive regulator for ilvC
K07451	Akenti_specific	Seawater_specific	Akenti_specific	15	67	1	118	26.4179	6.681e-06	6.82473e-05	14	mcrA; 5-methylcytosine-specific restriction enzyme A [EC:3.1.21.-]
K00363	Akenti_specific	Seawater_specific	Akenti_specific	25	57	7	112	7.01754	6.67357e-06	6.82473e-05	18	nirD; nitrite reductase (NADH) small subunit [EC:1.7.1.15]
K01571	Akenti_specific	Seawater_specific	Akenti_specific	15	67	1	118	26.4179	6.681e-06	6.82473e-05	14	oadA; oxaloacetate decarboxylase, alpha subunit [EC:4.1.1.112]
K12243	Akenti_specific	Seawater_specific	Akenti_specific	15	67	1	118	26.4179	6.681e-06	6.82473e-05	14	pchR; AraC family transcriptional regulator, transcriptional activator of the genes for pyochelin and ferripyochelin receptors
K10441	Akenti_specific	Seawater_specific	Akenti_specific	25	57	7	112	7.01754	6.67357e-06	6.82473e-05	18	rbsA; ribose transport system ATP-binding protein [EC:3.6.3.17]
K03554	Akenti_specific	Seawater_specific	Akenti_specific	25	57	7	112	7.01754	6.67357e-06	6.82473e-05	18	rdgC; recombination associated protein RdgC
K00560	Akenti_specific	Seawater_specific	Akenti_specific	61	21	50	69	4.00857	6.5514e-06	6.80674e-05	11	thyA, TYMS; thymidylate synthase [EC:2.1.1.45]
K02217	Akenti_specific	Seawater_specific	Akenti_specific	41	41	23	96	4.17391	6.42807e-06	6.69003e-05	18	ftnA, ftn; ferritin [EC:1.16.3.2]
K09933	Akenti_specific	Seawater_specific	Akenti_specific	17	65	2	117	15.3	6.14138e-06	6.40263e-05	15	mtfA; MtfA peptidase
K03737	Akenti_specific	Seawater_specific	Akenti_specific	17	65	2	117	15.3	6.14138e-06	6.40263e-05	15	por, nifJ; pyruvate-ferredoxin/flavodoxin oxidoreductase [EC:1.2.7.1 1.2.7.-]
K02472	Akenti_specific	Seawater_specific	Akenti_specific	17	65	2	117	15.3	6.14138e-06	6.40263e-05	15	wecC; UDP-N-acetyl-D-mannosaminuronic acid dehydrogenase [EC:1.1.1.336]
K13643	Akenti_specific	Seawater_specific	Akenti_specific	51	31	35	84	3.94839	5.70748e-06	5.98104e-05	16	iscR; Rrf2 family transcriptional regulator, iron-sulfur cluster assembly transcription factor
K07114	Akenti_specific	Seawater_specific	Akenti_specific	63	19	53	66	4.1291	5.64546e-06	5.92627e-05	10	yfbK; Ca-activated chloride channel homolog
K04760	Akenti_specific	Seawater_specific	Akenti_specific	26	56	8	111	6.44196	5.25037e-06	5.52106e-05	18	greB; transcription elongation factor GreB
K03683	Akenti_specific	Seawater_specific	Akenti_specific	26	56	8	111	6.44196	5.25037e-06	5.52106e-05	18	rnt; ribonuclease T [EC:3.1.13.-]
K06178	Akenti_specific	Seawater_specific	Akenti_specific	75	7	76	43	6.06203	5.12967e-06	5.41287e-05	-1	rluB; 23S rRNA pseudouridine2605 synthase [EC:5.4.99.22]
K04754	Akenti_specific	Seawater_specific	Akenti_specific	44	38	26	93	4.1417	4.93233e-06	5.21369e-05	18	mlaA, vacJ; phospholipid-binding lipoprotein MlaA
K14445	Akenti_specific	Seawater_specific	Akenti_specific	44	38	26	93	4.1417	4.93233e-06	5.21369e-05	18	SLC13A2_3_5; solute carrier family 13 (sodium-dependent dicarboxylate transporter), member 2/3/5
K02667	Akenti_specific	Seawater_specific	Akenti_specific	22	60	5	114	8.36	4.78527e-06	5.07589e-05	17	pilR, pehR; two-component system, NtrC family, response regulator PilR
K07053	Akenti_specific	Seawater_specific	Akenti_specific	43	39	25	94	4.14564	4.76984e-06	5.06837e-05	18	E3.1.3.97; 3',5'-nucleoside bisphosphate phosphatase [EC:3.1.3.97]
K03776	Akenti_specific	Seawater_specific	Akenti_specific	13	69	0	119	inf	4.72399e-06	5.02845e-05	13	aer; aerotaxis receptor
K07733	Akenti_specific	Seawater_specific	Akenti_specific	13	69	0	119	inf	4.72399e-06	5.02845e-05	13	alpA; prophage regulatory protein
K09952	Akenti_specific	Seawater_specific	Akenti_specific	13	69	0	119	inf	4.72399e-06	5.02845e-05	13	csn1, cas9; CRISPR-associated endonuclease Csn1 [EC:3.1.-.-]
K02297	Akenti_specific	Seawater_specific	Akenti_specific	13	69	0	119	inf	4.72399e-06	5.02845e-05	13	cyoA; cytochrome o ubiquinol oxidase subunit II [EC:1.10.3.10]
K02300	Akenti_specific	Seawater_specific	Akenti_specific	13	69	0	119	inf	4.72399e-06	5.02845e-05	13	cyoD; cytochrome o ubiquinol oxidase subunit IV
K07307	Akenti_specific	Seawater_specific	Akenti_specific	13	69	0	119	inf	4.72399e-06	5.02845e-05	13	dmsB; anaerobic dimethyl sulfoxide reductase subunit B (DMSO reductase iron- sulfur subunit)
K04031	Akenti_specific	Seawater_specific	Akenti_specific	13	69	0	119	inf	4.72399e-06	5.02845e-05	13	eutS; ethanolamine utilization protein EutS
K05601	Akenti_specific	Seawater_specific	Akenti_specific	13	69	0	119	inf	4.72399e-06	5.02845e-05	13	hcp; hydroxylamine reductase [EC:1.7.99.1]
K03605	Akenti_specific	Seawater_specific	Akenti_specific	13	69	0	119	inf	4.72399e-06	5.02845e-05	13	hyaD, hybD; hydrogenase maturation protease [EC:3.4.23.-]
K19714	Akenti_specific	Seawater_specific	Akenti_specific	13	69	0	119	inf	4.72399e-06	5.02845e-05	13	kdnB; 3-deoxy-alpha-D-manno-octulosonate 8-oxidase [EC:1.1.3.48]
K00176	Akenti_specific	Seawater_specific	Akenti_specific	13	69	0	119	inf	4.72399e-06	5.02845e-05	13	korD, oorD; 2-oxoglutarate ferredoxin oxidoreductase subunit delta [EC:1.2.7.3]
K18302	Akenti_specific	Seawater_specific	Akenti_specific	13	69	0	119	inf	4.72399e-06	5.02845e-05	13	mexJ; membrane fusion protein, multidrug efflux system
K07274	Akenti_specific	Seawater_specific	Akenti_specific	13	69	0	119	inf	4.72399e-06	5.02845e-05	13	mipA, ompV; MipA family protein
K00372	Akenti_specific	Seawater_specific	Akenti_specific	13	69	0	119	inf	4.72399e-06	5.02845e-05	13	nasA; assimilatory nitrate reductase catalytic subunit [EC:1.7.99.-]
K15576	Akenti_specific	Seawater_specific	Akenti_specific	13	69	0	119	inf	4.72399e-06	5.02845e-05	13	nrtA, nasF, cynA; nitrate/nitrite transport system substrate-binding protein
K04063	Akenti_specific	Seawater_specific	Akenti_specific	13	69	0	119	inf	4.72399e-06	5.02845e-05	13	osmC; osmotically inducible protein OsmC
K11741	Akenti_specific	Seawater_specific	Akenti_specific	13	69	0	119	inf	4.72399e-06	5.02845e-05	13	sugE; quaternary ammonium compound-resistance protein SugE
K08169	Akenti_specific	Seawater_specific	Akenti_specific	13	69	0	119	inf	4.72399e-06	5.02845e-05	13	yebQ; MFS transporter, DHA2 family, multidrug resistance protein
K00767	Akenti_specific	Seawater_specific	Akenti_specific	65	17	56	63	4.30147	4.54861e-06	4.99936e-05	9	nadC, QPRT; nicotinate-nucleotide pyrophosphorylase (carboxylating) [EC:2.4.2.19]
K00988	Akenti_specific	Seawater_specific	Seawater_specific	0	82	22	97	0	4.44287e-06	4.89198e-05	-22	APA1_2; sulfate adenylyltransferase (ADP) / ATP adenylyltransferase [EC:2.7.7.5 2.7.7.53]
K02092	Akenti_specific	Seawater_specific	Seawater_specific	0	82	22	97	0	4.44287e-06	4.89198e-05	-22	apcA; allophycocyanin alpha subunit
K02093	Akenti_specific	Seawater_specific	Seawater_specific	0	82	22	97	0	4.44287e-06	4.89198e-05	-22	apcB; allophycocyanin beta subunit
K02095	Akenti_specific	Seawater_specific	Seawater_specific	0	82	22	97	0	4.44287e-06	4.89198e-05	-22	apcD; allophycocyanin-B
K02096	Akenti_specific	Seawater_specific	Seawater_specific	0	82	22	97	0	4.44287e-06	4.89198e-05	-22	apcE; phycobilisome core-membrane linker protein
K03867	Akenti_specific	Seawater_specific	Seawater_specific	1	81	27	92	0.0420668	4.41247e-06	4.89198e-05	-26	BGLUT; UDP-glucose:tetrahydrobiopterin glucosyltransferase [EC:2.4.1.-]
K01582	Akenti_specific	Seawater_specific	Seawater_specific	0	82	22	97	0	4.44287e-06	4.89198e-05	-22	E4.1.1.18, ldcC, cadA; lysine decarboxylase [EC:4.1.1.18]
K17892	Akenti_specific	Seawater_specific	Seawater_specific	1	81	27	92	0.0420668	4.41247e-06	4.89198e-05	-26	FTRC; ferredoxin-thioredoxin reductase catalytic chain [EC:1.8.7.2]
K17108	Akenti_specific	Seawater_specific	Seawater_specific	0	82	22	97	0	4.44287e-06	4.89198e-05	-22	GBA2; non-lysosomal glucosylceramidase [EC:3.2.1.45]
K01193	Akenti_specific	Seawater_specific	Seawater_specific	0	82	22	97	0	4.44287e-06	4.89198e-05	-22	INV, sacA; beta-fructofuranosidase [EC:3.2.1.26]
K02693	Akenti_specific	Seawater_specific	Seawater_specific	0	82	22	97	0	4.44287e-06	4.89198e-05	-22	psaE; photosystem I subunit IV
K02710	Akenti_specific	Seawater_specific	Seawater_specific	0	82	22	97	0	4.44287e-06	4.89198e-05	-22	psbI; photosystem II PsbI protein
K02719	Akenti_specific	Seawater_specific	Seawater_specific	0	82	22	97	0	4.44287e-06	4.89198e-05	-22	psbU; photosystem II PsbU protein
K06119	Akenti_specific	Seawater_specific	Seawater_specific	0	82	22	97	0	4.44287e-06	4.89198e-05	-22	SQD2; sulfoquinovosyltransferase [EC:2.4.1.-]
K06959	Akenti_specific	Seawater_specific	Akenti_specific	34	48	15	104	4.91111	4.32966e-06	4.89139e-05	19	tex; protein Tex
K02078	Akenti_specific	Seawater_specific	Akenti_specific	79	3	86	33	10.1047	4.06233e-06	4.61447e-05	-7	acpP; acyl carrier protein
K15512	Akenti_specific	Seawater_specific	Seawater_specific	0	82	23	96	0	4.07695e-06	4.61447e-05	-23	boxB; benzoyl-CoA 2,3-epoxidase subunit B [EC:1.14.13.208]
K02288	Akenti_specific	Seawater_specific	Seawater_specific	0	82	23	96	0	4.07695e-06	4.61447e-05	-23	cpcE; phycocyanobilin lyase subunit alpha [EC:4.4.1.32]
K02289	Akenti_specific	Seawater_specific	Seawater_specific	0	82	23	96	0	4.07695e-06	4.61447e-05	-23	cpcF; phycocyanobilin lyase subunit beta [EC:4.4.1.32]
K05376	Akenti_specific	Seawater_specific	Seawater_specific	0	82	23	96	0	4.07695e-06	4.61447e-05	-23	cpeA, mpeA; phycoerythrin alpha chain
K05384	Akenti_specific	Seawater_specific	Seawater_specific	0	82	23	96	0	4.07695e-06	4.61447e-05	-23	cpeU, mpeU; bilin biosynthesis protein
K05386	Akenti_specific	Seawater_specific	Seawater_specific	0	82	23	96	0	4.07695e-06	4.61447e-05	-23	cpeZ; bilin biosynthesis protein
K03101	Akenti_specific	Seawater_specific	Akenti_specific	78	4	83	36	8.45783	4.00021e-06	4.61447e-05	-5	lspA; signal peptidase II [EC:3.4.23.36]
K15973	Akenti_specific	Seawater_specific	Akenti_specific	28	54	9	110	6.33745	4.04326e-06	4.61447e-05	19	mhqR; MarR family transcriptional regulator, 2-MHQ and catechol-resistance regulon repressor
K05572	Akenti_specific	Seawater_specific	Seawater_specific	0	82	23	96	0	4.07695e-06	4.61447e-05	-23	ndhA; NAD(P)H-quinone oxidoreductase subunit 1 [EC:7.1.1.2]
K05580	Akenti_specific	Seawater_specific	Seawater_specific	0	82	23	96	0	4.07695e-06	4.61447e-05	-23	ndhI; NAD(P)H-quinone oxidoreductase subunit I [EC:7.1.1.2]
K13799	Akenti_specific	Seawater_specific	Seawater_specific	0	82	23	96	0	4.07695e-06	4.61447e-05	-23	panC-cmk; pantoate ligase / CMP/dCMP kinase [EC:6.3.2.1 2.7.4.25]
K05371	Akenti_specific	Seawater_specific	Seawater_specific	0	82	23	96	0	4.07695e-06	4.61447e-05	-23	pcyA; phycocyanobilin:ferredoxin oxidoreductase [EC:1.3.7.5]
K08902	Akenti_specific	Seawater_specific	Seawater_specific	0	82	23	96	0	4.07695e-06	4.61447e-05	-23	psb27; photosystem II Psb27 protein
K19032	Akenti_specific	Seawater_specific	Seawater_specific	0	82	23	96	0	4.07695e-06	4.61447e-05	-23	PSRP3; 30S ribosomal protein 3
K08484	Akenti_specific	Seawater_specific	Akenti_specific	36	46	17	102	4.69565	3.95093e-06	4.61447e-05	19	PTS-EI.PTSP, ptsP; phosphotransferase system, enzyme I, PtsP [EC:2.7.3.9]
K10439	Akenti_specific	Seawater_specific	Akenti_specific	28	54	9	110	6.33745	4.04326e-06	4.61447e-05	19	rbsB; ribose transport system substrate-binding protein
K03600	Akenti_specific	Seawater_specific	Akenti_specific	28	54	9	110	6.33745	4.04326e-06	4.61447e-05	19	sspB; stringent starvation protein B
K09823	Akenti_specific	Seawater_specific	Akenti_specific	36	46	17	102	4.69565	3.95093e-06	4.61447e-05	19	zur; Fur family transcriptional regulator, zinc uptake regulator
K01239	Akenti_specific	Seawater_specific	Seawater_specific	8	74	46	73	0.171563	3.88307e-06	4.55624e-05	-38	iunH; purine nucleosidase [EC:3.2.2.1]
K00963	Akenti_specific	Seawater_specific	Akenti_specific	57	25	43	76	4.02977	3.81948e-06	4.49029e-05	14	UGP2, galU, galF; UTP--glucose-1-phosphate uridylyltransferase [EC:2.7.7.9]
K07678	Akenti_specific	Seawater_specific	Akenti_specific	21	61	4	115	9.89754	3.74706e-06	4.41369e-05	17	barA, gacS, varS; two-component system, NarL family, sensor histidine kinase BarA [EC:2.7.13.3]
K07104	Akenti_specific	Seawater_specific	Seawater_specific	2	80	30	89	0.0741667	3.67177e-06	4.3334e-05	-28	catE; catechol 2,3-dioxygenase [EC:1.13.11.2]
K01129	Akenti_specific	Seawater_specific	Akenti_specific	55	27	40	79	4.02315	3.66464e-06	4.3334e-05	15	dgt; dGTPase [EC:3.1.5.1]
K00554	Akenti_specific	Seawater_specific	Akenti_specific	80	2	89	30	13.4831	3.67177e-06	4.3334e-05	-9	trmD; tRNA (guanine37-N1)-methyltransferase [EC:2.1.1.228]
K01637	Akenti_specific	Seawater_specific	Akenti_specific	31	51	12	107	5.41993	3.54085e-06	4.20338e-05	19	E4.1.3.1, aceA; isocitrate lyase [EC:4.1.3.1]
K03586	Akenti_specific	Seawater_specific	Akenti_specific	24	58	6	113	7.7931	3.41404e-06	4.06077e-05	18	ftsL; cell division protein FtsL
K08304	Akenti_specific	Seawater_specific	Akenti_specific	24	58	6	113	7.7931	3.41404e-06	4.06077e-05	18	mltA; membrane-bound lytic murein transglycosylase A [EC:4.2.2.-]
K18691	Akenti_specific	Seawater_specific	Akenti_specific	24	58	6	113	7.7931	3.41404e-06	4.06077e-05	18	mltF; membrane-bound lytic murein transglycosylase F [EC:4.2.2.-]
K00135	Akenti_specific	Seawater_specific	Akenti_specific	60	22	47	72	4.17795	3.37306e-06	4.03572e-05	13	gabD; succinate-semialdehyde dehydrogenase / glutarate-semialdehyde dehydrogenase [EC:1.2.1.16 1.2.1.79 1.2.1.20]
K03327	Akenti_specific	Seawater_specific	Akenti_specific	60	22	47	72	4.17795	3.37306e-06	4.03572e-05	13	TC.MATE, SLC47A, norM, mdtK, dinF; multidrug resistance protein, MATE family
K07106	Akenti_specific	Seawater_specific	Seawater_specific	14	68	58	61	0.216531	3.15202e-06	3.78616e-05	-44	murQ; N-acetylmuramic acid 6-phosphate etherase [EC:4.2.1.126]
K11689	Akenti_specific	Seawater_specific	Akenti_specific	29	53	10	109	5.96415	3.08888e-06	3.71766e-05	19	dctQ; C4-dicarboxylate transporter, DctQ subunit
K11065	Akenti_specific	Seawater_specific	Akenti_specific	29	53	10	109	5.96415	3.08888e-06	3.71766e-05	19	tpx; thiol peroxidase, atypical 2-Cys peroxiredoxin [EC:1.11.1.15]
K02408	Akenti_specific	Seawater_specific	Akenti_specific	41	41	22	97	4.40909	2.93909e-06	3.55145e-05	19	fliE; flagellar hook-basal body complex protein FliE
K09812	Akenti_specific	Seawater_specific	Akenti_specific	68	14	60	59	4.77619	2.7664e-06	3.34944e-05	8	ftsE; cell division transport system ATP-binding protein
K15256	Akenti_specific	Seawater_specific	Akenti_specific	36	46	16	103	5.03804	2.70077e-06	3.2765e-05	20	cmoA; tRNA (cmo5U34)-methyltransferase [EC:2.1.1.-]
K07039	Akenti_specific	Seawater_specific	Akenti_specific	16	66	1	118	28.6061	2.56446e-06	3.11736e-05	15	K07039; uncharacterized protein
K09929	Akenti_specific	Seawater_specific	Akenti_specific	16	66	1	118	28.6061	2.56446e-06	3.11736e-05	15	K09929; uncharacterized protein
K11624	Akenti_specific	Seawater_specific	Akenti_specific	16	66	1	118	28.6061	2.56446e-06	3.11736e-05	15	ydfI; two-component system, NarL family, response regulator YdfI
K13770	Akenti_specific	Seawater_specific	Akenti_specific	16	66	1	118	28.6061	2.56446e-06	3.11736e-05	15	ysiA, fadR; TetR/AcrR family transcriptional regulator, fatty acid metabolism regulator protein
K03411	Akenti_specific	Seawater_specific	Akenti_specific	18	64	2	117	16.4531	2.42712e-06	2.9742e-05	16	cheD; chemotaxis protein CheD [EC:3.5.1.44]
K02461	Akenti_specific	Seawater_specific	Akenti_specific	18	64	2	117	16.4531	2.42712e-06	2.9742e-05	16	gspL; general secretion pathway protein L
K09926	Akenti_specific	Seawater_specific	Akenti_specific	18	64	2	117	16.4531	2.42712e-06	2.9742e-05	16	K09926; uncharacterized protein
K02671	Akenti_specific	Seawater_specific	Akenti_specific	18	64	2	117	16.4531	2.42712e-06	2.9742e-05	16	pilV; type IV pilus assembly protein PilV
K07740	Akenti_specific	Seawater_specific	Akenti_specific	18	64	2	117	16.4531	2.42712e-06	2.9742e-05	16	rsd; regulator of sigma D
K15598	Akenti_specific	Seawater_specific	Akenti_specific	18	64	2	117	16.4531	2.42712e-06	2.9742e-05	16	thiY; putative hydroxymethylpyrimidine transport system substrate-binding protein
K02407	Akenti_specific	Seawater_specific	Akenti_specific	27	55	8	111	6.81136	2.38258e-06	2.95537e-05	19	fliD; flagellar hook-associated protein 2
K00782	Akenti_specific	Seawater_specific	Akenti_specific	27	55	8	111	6.81136	2.38258e-06	2.95537e-05	19	lldG; L-lactate dehydrogenase complex protein LldG
K02841	Akenti_specific	Seawater_specific	Akenti_specific	27	55	8	111	6.81136	2.38258e-06	2.95537e-05	19	waaC, rfaC; heptosyltransferase I [EC:2.4.-.-]
K01624	Akenti_specific	Seawater_specific	Akenti_specific	69	13	62	57	4.87965	2.31694e-06	2.89165e-05	7	FBA, fbaA; fructose-bisphosphate aldolase, class II [EC:4.1.2.13]
K09817	Akenti_specific	Seawater_specific	Akenti_specific	44	38	25	94	4.35368	2.27195e-06	2.84134e-05	19	znuC; zinc transport system ATP-binding protein [EC:3.6.3.-]
K05788	Akenti_specific	Seawater_specific	Akenti_specific	49	33	31	88	4.21505	2.20677e-06	2.76551e-05	18	ihfB, himD; integration host factor subunit beta
K05350	Akenti_specific	Seawater_specific	Seawater_specific	3	79	34	85	0.0949367	2.17868e-06	2.73595e-05	-31	bglB; beta-glucosidase [EC:3.2.1.21]
K07149	Akenti_specific	Seawater_specific	Seawater_specific	1	81	28	91	0.0401235	2.15677e-06	2.71404e-05	-27	K07149; uncharacterized protein
K10764	Akenti_specific	Seawater_specific	Akenti_specific	41	41	21	98	4.66667	2.10675e-06	2.6566e-05	20	metZ; O-succinylhomoserine sulfhydrylase [EC:2.5.1.-]
K03839	Akenti_specific	Seawater_specific	Akenti_specific	23	59	5	114	8.88814	2.01536e-06	2.54664e-05	18	fldA, nifF, isiB; flavodoxin I
K07814	Akenti_specific	Seawater_specific	Akenti_specific	23	59	5	114	8.88814	2.01536e-06	2.54664e-05	18	K07814; putative two-component system response regulator
K07235	Akenti_specific	Seawater_specific	Akenti_specific	23	59	5	114	8.88814	2.01536e-06	2.54664e-05	18	tusD, dsrE; tRNA 2-thiouridine synthesizing protein D [EC:2.8.1.-]
K02065	Akenti_specific	Seawater_specific	Akenti_specific	66	16	56	63	4.64062	1.96812e-06	2.50255e-05	10	mlaF, linL, mkl; phospholipid/cholesterol/gamma-HCH transport system ATP-binding protein
K02097	Akenti_specific	Seawater_specific	Seawater_specific	0	82	24	95	0	1.93178e-06	2.4615e-05	-24	apcF; phycobilisome core component
K05378	Akenti_specific	Seawater_specific	Seawater_specific	0	82	24	95	0	1.93178e-06	2.4615e-05	-24	cpeC, mpeC; phycoerythrin-associated linker protein
K05379	Akenti_specific	Seawater_specific	Seawater_specific	0	82	24	95	0	1.93178e-06	2.4615e-05	-24	cpeD, mpeD; phycoerythrin-associated linker protein
K05385	Akenti_specific	Seawater_specific	Seawater_specific	0	82	24	95	0	1.93178e-06	2.4615e-05	-24	cpeY; bilin biosynthesis protein
K05583	Akenti_specific	Seawater_specific	Seawater_specific	0	82	24	95	0	1.93178e-06	2.4615e-05	-24	ndhL; NAD(P)H-quinone oxidoreductase subunit L [EC:7.1.1.2]
K05584	Akenti_specific	Seawater_specific	Seawater_specific	0	82	24	95	0	1.93178e-06	2.4615e-05	-24	ndhM; NAD(P)H-quinone oxidoreductase subunit M [EC:7.1.1.2]
K00524	Akenti_specific	Seawater_specific	Seawater_specific	0	82	24	95	0	1.93178e-06	2.4615e-05	-24	nrdJ; ribonucleotide reductase, class II [EC:1.17.4.1]
K02692	Akenti_specific	Seawater_specific	Seawater_specific	0	82	24	95	0	1.93178e-06	2.4615e-05	-24	psaD; photosystem I subunit II
K02723	Akenti_specific	Seawater_specific	Seawater_specific	0	82	24	95	0	1.93178e-06	2.4615e-05	-24	psbY; photosystem II PsbY protein
K02724	Akenti_specific	Seawater_specific	Seawater_specific	0	82	24	95	0	1.93178e-06	2.4615e-05	-24	psbZ; photosystem II PsbZ protein
K08479	Akenti_specific	Seawater_specific	Seawater_specific	0	82	24	95	0	1.93178e-06	2.4615e-05	-24	sasA; two-component system, OmpR family, clock-associated histidine kinase SasA [EC:2.7.13.3]
K00833	Akenti_specific	Seawater_specific	Akenti_specific	55	27	39	80	4.17854	1.86784e-06	2.4362e-05	16	bioA; adenosylmethionine---8-amino-7-oxononanoate aminotransferase [EC:2.6.1.62]
K19092	Akenti_specific	Seawater_specific	Akenti_specific	20	62	3	116	12.4731	1.86587e-06	2.4362e-05	17	parE1_3_4; toxin ParE1/3/4
K15548	Akenti_specific	Seawater_specific	Akenti_specific	14	68	0	119	inf	1.73381e-06	2.27114e-05	14	aaeA; p-hydroxybenzoic acid efflux pump subunit AaeA
K10917	Akenti_specific	Seawater_specific	Akenti_specific	14	68	0	119	inf	1.73381e-06	2.27114e-05	14	aphA; PadR family transcriptional regulator, regulatory protein AphA
K19126	Akenti_specific	Seawater_specific	Akenti_specific	14	68	0	119	inf	1.73381e-06	2.27114e-05	14	casE, cse3; CRISPR system Cascade subunit CasE
K02009	Akenti_specific	Seawater_specific	Akenti_specific	14	68	0	119	inf	1.73381e-06	2.27114e-05	14	cbiN; cobalt/nickel transport protein
K18997	Akenti_specific	Seawater_specific	Akenti_specific	14	68	0	119	inf	1.73381e-06	2.27114e-05	14	cbpM; chaperone modulatory protein CbpM
K07181	Akenti_specific	Seawater_specific	Akenti_specific	14	68	0	119	inf	1.73381e-06	2.27114e-05	14	cdgJ; c-di-GMP phosphodiesterase [EC:3.1.4.52]
K02225	Akenti_specific	Seawater_specific	Akenti_specific	14	68	0	119	inf	1.73381e-06	2.27114e-05	14	cobC1, cobC; cobalamin biosynthetic protein CobC
K02279	Akenti_specific	Seawater_specific	Akenti_specific	14	68	0	119	inf	1.73381e-06	2.27114e-05	14	cpaB, rcpC; pilus assembly protein CpaB
K07306	Akenti_specific	Seawater_specific	Akenti_specific	14	68	0	119	inf	1.73381e-06	2.27114e-05	14	dmsA; anaerobic dimethyl sulfoxide reductase subunit A [EC:1.8.5.3]
K19172	Akenti_specific	Seawater_specific	Akenti_specific	14	68	0	119	inf	1.73381e-06	2.27114e-05	14	dndE; DNA sulfur modification protein DndE
K03436	Akenti_specific	Seawater_specific	Akenti_specific	14	68	0	119	inf	1.73381e-06	2.27114e-05	14	fruR2, fruR; DeoR family transcriptional regulator, fructose operon transcriptional repressor
K03799	Akenti_specific	Seawater_specific	Akenti_specific	48	34	29	90	4.38134	1.71427e-06	2.27114e-05	19	htpX; heat shock protein HtpX [EC:3.4.24.-]
K09803	Akenti_specific	Seawater_specific	Akenti_specific	14	68	0	119	inf	1.73381e-06	2.27114e-05	14	K09803; uncharacterized protein
K13652	Akenti_specific	Seawater_specific	Akenti_specific	14	68	0	119	inf	1.73381e-06	2.27114e-05	14	K13652; AraC family transcriptional regulator
K11747	Akenti_specific	Seawater_specific	Akenti_specific	14	68	0	119	inf	1.73381e-06	2.27114e-05	14	kefB; glutathione-regulated potassium-efflux system protein KefB
K00177	Akenti_specific	Seawater_specific	Akenti_specific	14	68	0	119	inf	1.73381e-06	2.27114e-05	14	korC, oorC; 2-oxoglutarate ferredoxin oxidoreductase subunit gamma [EC:1.2.7.3]
K07452	Akenti_specific	Seawater_specific	Akenti_specific	14	68	0	119	inf	1.73381e-06	2.27114e-05	14	mcrB; 5-methylcytosine-specific restriction enzyme B [EC:3.1.21.-]
K19147	Akenti_specific	Seawater_specific	Akenti_specific	14	68	0	119	inf	1.73381e-06	2.27114e-05	14	mcrC; 5-methylcytosine-specific restriction enzyme subunit McrC
K01801	Akenti_specific	Seawater_specific	Akenti_specific	14	68	0	119	inf	1.73381e-06	2.27114e-05	14	nagL; maleylpyruvate isomerase [EC:5.2.1.4]
K00374	Akenti_specific	Seawater_specific	Akenti_specific	14	68	0	119	inf	1.73381e-06	2.27114e-05	14	narI, narV; nitrate reductase gamma subunit [EC:1.7.5.1 1.7.99.-]
K05306	Akenti_specific	Seawater_specific	Akenti_specific	14	68	0	119	inf	1.73381e-06	2.27114e-05	14	phnX; phosphonoacetaldehyde hydrolase [EC:3.11.1.1]
K18923	Akenti_specific	Seawater_specific	Akenti_specific	14	68	0	119	inf	1.73381e-06	2.27114e-05	14	stbD; antitoxin StbD
K20988	Akenti_specific	Seawater_specific	Akenti_specific	14	68	0	119	inf	1.73381e-06	2.27114e-05	14	vpsN; polysaccharide biosynthesis/export protein VpsN
K03825	Akenti_specific	Seawater_specific	Akenti_specific	14	68	0	119	inf	1.73381e-06	2.27114e-05	14	yhhY; putative acetyltransferase [EC:2.3.1.-]
K21028	Akenti_specific	Seawater_specific	Akenti_specific	14	68	0	119	inf	1.73381e-06	2.27114e-05	14	ynjE; molybdopterin synthase sulfurtransferase [EC:2.8.1.11]
K05522	Akenti_specific	Seawater_specific	Seawater_specific	6	76	43	76	0.139535	1.62816e-06	2.2542e-05	-37	nei; endonuclease VIII [EC:3.2.2.- 4.2.99.18]
K00018	Akenti_specific	Seawater_specific	Akenti_specific	26	56	7	112	7.42857	1.58637e-06	2.20136e-05	19	hprA; glycerate dehydrogenase [EC:1.1.1.29]
K07320	Akenti_specific	Seawater_specific	Akenti_specific	26	56	7	112	7.42857	1.58637e-06	2.20136e-05	19	prmB; ribosomal protein L3 glutamine methyltransferase [EC:2.1.1.298]
K03690	Akenti_specific	Seawater_specific	Akenti_specific	26	56	7	112	7.42857	1.58637e-06	2.20136e-05	19	ubiJ; ubiquinone biosynthesis protein UbiJ
K09165	Akenti_specific	Seawater_specific	Akenti_specific	25	57	6	113	8.26023	1.51962e-06	2.12328e-05	19	K09165; uncharacterized protein
K03628	Akenti_specific	Seawater_specific	Akenti_specific	73	9	69	50	5.87762	1.47257e-06	2.06228e-05	4	rho; transcription termination factor Rho
K03599	Akenti_specific	Seawater_specific	Akenti_specific	30	52	10	109	6.28846	1.40471e-06	1.97179e-05	20	sspA, mglA; stringent starvation protein A
K03092	Akenti_specific	Seawater_specific	Akenti_specific	63	19	50	69	4.57579	1.37653e-06	1.9367e-05	13	rpoN; RNA polymerase sigma-54 factor
K03281	Akenti_specific	Seawater_specific	Akenti_specific	51	31	33	86	4.28739	1.36736e-06	1.92826e-05	18	TC.CIC; chloride channel protein, CIC family
K00979	Akenti_specific	Seawater_specific	Akenti_specific	69	13	61	58	5.04666	1.22113e-06	1.72606e-05	8	kdsB; 3-deoxy-manno-octulosonate cytidylyltransferase (CMP-KDO synthetase) [EC:2.7.7.38]
K05275	Akenti_specific	Seawater_specific	Seawater_specific	10	72	52	67	0.178953	1.16819e-06	1.65507e-05	-42	E1.1.1.65; pyridoxine 4-dehydrogenase [EC:1.1.1.65]
K03596	Akenti_specific	Seawater_specific	Akenti_specific	78	4	81	38	9.14815	1.12587e-06	1.59885e-05	-3	lepA; GTP-binding protein LepA
K19804	Akenti_specific	Seawater_specific	Akenti_specific	28	54	8	111	7.19444	1.0754e-06	1.53074e-05	20	lapB; lipopolysaccharide assembly protein B
K00982	Akenti_specific	Seawater_specific	Akenti_specific	44	38	24	95	4.58333	1.04095e-06	1.48519e-05	20	glnE; [glutamine synthetase] adenylyltransferase / [glutamine synthetase]-adenylyl-L-tyrosine phosphorylase [EC:2.7.7.42 2.7.7.89]
K10763	Akenti_specific	Seawater_specific	Akenti_specific	29	53	9	110	6.68763	1.02316e-06	1.46325e-05	20	hda; DnaA-homolog protein
K06889	Akenti_specific	Seawater_specific	Akenti_specific	57	25	41	78	4.33756	1.02072e-06	1.46325e-05	16	K06889; uncharacterized protein
K09889	Akenti_specific	Seawater_specific	Akenti_specific	29	53	9	110	6.68763	1.02316e-06	1.46325e-05	20	yjgA; ribosome-associated protein
K09810	Akenti_specific	Seawater_specific	Akenti_specific	66	16	55	64	4.8	1.00465e-06	1.44699e-05	11	lolD; lipoprotein-releasing system ATP-binding protein [EC:3.6.3.-]
K09386	Akenti_specific	Seawater_specific	Seawater_specific	5	77	41	78	0.123535	9.95037e-07	1.43654e-05	-36	K09386; uncharacterized protein
K00230	Akenti_specific	Seawater_specific	Akenti_specific	17	65	1	118	30.8615	9.71821e-07	1.40636e-05	16	hemG; menaquinone-dependent protoporphyrinogen oxidase [EC:1.3.5.3]
K02304	Akenti_specific	Seawater_specific	Akenti_specific	17	65	1	118	30.8615	9.71821e-07	1.40636e-05	16	MET8; precorrin-2 dehydrogenase / sirohydrochlorin ferrochelatase [EC:1.3.1.76 4.99.1.4]
K02668	Akenti_specific	Seawater_specific	Akenti_specific	17	65	1	118	30.8615	9.71821e-07	1.40636e-05	16	pilS, pehS; two-component system, NtrC family, sensor histidine kinase PilS [EC:2.7.13.3]
K14058	Akenti_specific	Seawater_specific	Akenti_specific	36	46	15	104	5.42609	9.6416e-07	1.40636e-05	21	ttcA; tRNA 2-thiocytidine biosynthesis protein TtcA
K09136	Akenti_specific	Seawater_specific	Akenti_specific	17	65	1	118	30.8615	9.71821e-07	1.40636e-05	16	ycaO; ribosomal protein S12 methylthiotransferase accessory factor
K00523	Akenti_specific	Seawater_specific	Akenti_specific	19	63	2	117	17.6429	9.4506e-07	1.38411e-05	17	ascD, ddhD, rfbI; CDP-4-dehydro-6-deoxyglucose reductase, E3 [EC:1.17.1.1]
K21024	Akenti_specific	Seawater_specific	Akenti_specific	19	63	2	117	17.6429	9.4506e-07	1.38411e-05	17	bifA; c-di-GMP phosphodiesterase [EC:3.1.4.52]
K07787	Akenti_specific	Seawater_specific	Akenti_specific	19	63	2	117	17.6429	9.4506e-07	1.38411e-05	17	cusA, silA; Cu(I)/Ag(I) efflux system membrane protein CusA/SilA
K07139	Akenti_specific	Seawater_specific	Akenti_specific	19	63	2	117	17.6429	9.4506e-07	1.38411e-05	17	K07139; uncharacterized protein
K12511	Akenti_specific	Seawater_specific	Akenti_specific	19	63	2	117	17.6429	9.4506e-07	1.38411e-05	17	tadC; tight adherence protein C
K02094	Akenti_specific	Seawater_specific	Seawater_specific	0	82	25	94	0	9.28331e-07	1.37619e-05	-25	apcC; phycobilisome core linker protein
K05381	Akenti_specific	Seawater_specific	Seawater_specific	0	82	25	94	0	9.28331e-07	1.37619e-05	-25	cpeR; phycoerythrin-associated linker protein
K11777	Akenti_specific	Seawater_specific	Seawater_specific	0	82	25	94	0	9.28331e-07	1.37619e-05	-25	K11777; HAD superfamily phosphatase
K03887	Akenti_specific	Seawater_specific	Seawater_specific	0	82	25	94	0	9.28331e-07	1.37619e-05	-25	MQCRB, qcrB, bfcB, petB; menaquinol-cytochrome c reductase cytochrome b subunit
K20940	Akenti_specific	Seawater_specific	Seawater_specific	0	82	25	94	0	9.28331e-07	1.37619e-05	-25	phzS; 5-methylphenazine-1-carboxylate 1-monooxygenase [EC:1.14.13.218]
K14518	Akenti_specific	Seawater_specific	Seawater_specific	0	82	25	94	0	9.28331e-07	1.37619e-05	-25	pipX; PII interaction protein X
K02697	Akenti_specific	Seawater_specific	Seawater_specific	0	82	25	94	0	9.28331e-07	1.37619e-05	-25	psaJ; photosystem I subunit IX
K02709	Akenti_specific	Seawater_specific	Seawater_specific	0	82	25	94	0	9.28331e-07	1.37619e-05	-25	psbH; photosystem II PsbH protein
K02715	Akenti_specific	Seawater_specific	Seawater_specific	0	82	25	94	0	9.28331e-07	1.37619e-05	-25	psbN; PsbN protein
K07577	Akenti_specific	Seawater_specific	Seawater_specific	12	70	57	62	0.186466	9.07812e-07	1.37598e-05	-45	K07577; putative mRNA 3-end processing factor
K03733	Akenti_specific	Seawater_specific	Akenti_specific	70	12	62	57	5.3629	9.07812e-07	1.37598e-05	8	xerC; integrase/recombinase XerC
K03149	Akenti_specific	Seawater_specific	Akenti_specific	56	26	39	80	4.41815	8.42664e-07	1.28364e-05	17	thiG; thiazole synthase [EC:2.8.1.10]
K03806	Akenti_specific	Seawater_specific	Akenti_specific	24	58	5	114	9.43448	8.36479e-07	1.28048e-05	19	ampD; N-acetyl-anhydromuramoyl-L-alanine amidase [EC:3.5.1.28]
K06910	Akenti_specific	Seawater_specific	Akenti_specific	24	58	5	114	9.43448	8.36479e-07	1.28048e-05	19	K06910; uncharacterized protein
K01918	Akenti_specific	Seawater_specific	Akenti_specific	67	15	56	63	5.025	8.38483e-07	1.28048e-05	11	panC; pantoate--beta-alanine ligase [EC:6.3.2.1]
K02650	Akenti_specific	Seawater_specific	Akenti_specific	24	58	5	114	9.43448	8.36479e-07	1.28048e-05	19	pilA; type IV pilus assembly protein PilA
K00557	Akenti_specific	Seawater_specific	Akenti_specific	24	58	5	114	9.43448	8.36479e-07	1.28048e-05	19	trmA; tRNA (uracil-5-)-methyltransferase [EC:2.1.1.35]
K01658	Akenti_specific	Seawater_specific	Akenti_specific	61	21	46	73	4.60973	7.63176e-07	1.1803e-05	15	trpG; anthranilate synthase component II [EC:4.1.3.27]
K12942	Akenti_specific	Seawater_specific	Akenti_specific	21	61	3	116	13.3115	7.39291e-07	1.14628e-05	18	abgT; aminobenzoyl-glutamate transport protein
K03694	Akenti_specific	Seawater_specific	Akenti_specific	47	35	27	92	4.57566	7.38047e-07	1.14628e-05	20	clpA; ATP-dependent Clp protease ATP-binding subunit ClpA
K01581	Akenti_specific	Seawater_specific	Akenti_specific	21	61	3	116	13.3115	7.39291e-07	1.14628e-05	18	E4.1.1.17, ODC1, speC, speF; ornithine decarboxylase [EC:4.1.1.17]
K00209	Akenti_specific	Seawater_specific	Akenti_specific	21	61	3	116	13.3115	7.39291e-07	1.14628e-05	18	fabV, ter; enoyl-[acyl-carrier protein] reductase / trans-2-enoyl-CoA reductase (NAD+) [EC:1.3.1.9 1.3.1.44]
K07746	Akenti_specific	Seawater_specific	Akenti_specific	21	61	3	116	13.3115	7.39291e-07	1.14628e-05	18	parD1_3_4; antitoxin ParD1/3/4
K04744	Akenti_specific	Seawater_specific	Akenti_specific	44	38	23	96	4.83295	7.27749e-07	1.14296e-05	21	lptD, imp, ostA; LPS-assembly protein
K02806	Akenti_specific	Seawater_specific	Akenti_specific	44	38	23	96	4.83295	7.27749e-07	1.14296e-05	21	PTS-Ntr-EIIA, ptsN; PTS system, nitrogen regulatory IIA component [EC:2.7.1.-]
K03284	Akenti_specific	Seawater_specific	Akenti_specific	23	59	4	115	11.2076	6.88184e-07	1.08644e-05	19	corA; magnesium transporter
K07070	Akenti_specific	Seawater_specific	Akenti_specific	23	59	4	115	11.2076	6.88184e-07	1.08644e-05	19	K07070; uncharacterized protein
K09895	Akenti_specific	Seawater_specific	Akenti_specific	23	59	4	115	11.2076	6.88184e-07	1.08644e-05	19	K09895; uncharacterized protein
K09902	Akenti_specific	Seawater_specific	Akenti_specific	23	59	4	115	11.2076	6.88184e-07	1.08644e-05	19	K09902; uncharacterized protein
K09938	Akenti_specific	Seawater_specific	Akenti_specific	23	59	4	115	11.2076	6.88184e-07	1.08644e-05	19	K09938; uncharacterized protein
K12541	Akenti_specific	Seawater_specific	Akenti_specific	23	59	4	115	11.2076	6.88184e-07	1.08644e-05	19	lapB; ATP-binding cassette, subfamily C, bacterial LapB
K11179	Akenti_specific	Seawater_specific	Akenti_specific	26	56	6	113	8.74405	6.75727e-07	1.08366e-05	20	tusE, dsrC; tRNA 2-thiouridine synthesizing protein E [EC:2.8.1.-]
K10027	Akenti_specific	Seawater_specific	Seawater_specific	19	63	70	49	0.211111	6.71942e-07	1.08044e-05	-51	crtI; phytoene desaturase [EC:1.3.99.26 1.3.99.28 1.3.99.29 1.3.99.31]
K02237	Akenti_specific	Seawater_specific	Akenti_specific	31	51	10	109	6.62549	6.34764e-07	1.02588e-05	21	comEA; competence protein ComEA
K03981	Akenti_specific	Seawater_specific	Akenti_specific	31	51	10	109	6.62549	6.34764e-07	1.02588e-05	21	dsbC; thiol:disulfide interchange protein DsbC [EC:5.3.4.1]
K02419	Akenti_specific	Seawater_specific	Akenti_specific	43	39	22	97	4.86131	6.3632e-07	1.02588e-05	21	fliP; flagellar biosynthetic protein FliP
K01989	Akenti_specific	Seawater_specific	Akenti_specific	15	67	0	119	inf	6.30475e-07	1.02461e-05	15	ABC.X4.S; putative ABC transport system substrate-binding protein
K01993	Akenti_specific	Seawater_specific	Akenti_specific	15	67	0	119	inf	6.30475e-07	1.02461e-05	15	ABC-2.TX; HlyD family secretion protein
K02121	Akenti_specific	Seawater_specific	Akenti_specific	15	67	0	119	inf	6.30475e-07	1.02461e-05	15	ATPVE, ntpE, atpE; V/A-type H+/Na+-transporting ATPase subunit E
K19123	Akenti_specific	Seawater_specific	Akenti_specific	15	67	0	119	inf	6.30475e-07	1.02461e-05	15	casA, cse1; CRISPR system Cascade subunit CasA
K19046	Akenti_specific	Seawater_specific	Akenti_specific	15	67	0	119	inf	6.30475e-07	1.02461e-05	15	casB, cse2; CRISPR system Cascade subunit CasB
K19124	Akenti_specific	Seawater_specific	Akenti_specific	15	67	0	119	inf	6.30475e-07	1.02461e-05	15	casC, cse4; CRISPR system Cascade subunit CasC
K19125	Akenti_specific	Seawater_specific	Akenti_specific	15	67	0	119	inf	6.30475e-07	1.02461e-05	15	casD, cse5; CRISPR system Cascade subunit CasD
K07640	Akenti_specific	Seawater_specific	Akenti_specific	15	67	0	119	inf	6.30475e-07	1.02461e-05	15	cpxA; two-component system, OmpR family, sensor histidine kinase CpxA [EC:2.7.13.3]
K11921	Akenti_specific	Seawater_specific	Akenti_specific	15	67	0	119	inf	6.30475e-07	1.02461e-05	15	cynR; LysR family transcriptional regulator, cyn operon transcriptional activator
K02401	Akenti_specific	Seawater_specific	Akenti_specific	42	40	21	98	4.9	6.00765e-07	1.02461e-05	21	flhB; flagellar biosynthetic protein FlhB
K00030	Akenti_specific	Seawater_specific	Akenti_specific	15	67	0	119	inf	6.30475e-07	1.02461e-05	15	IDH3; isocitrate dehydrogenase (NAD+) [EC:1.1.1.41]
K07085	Akenti_specific	Seawater_specific	Akenti_specific	15	67	0	119	inf	6.30475e-07	1.02461e-05	15	K07085; putative transport protein
K09144	Akenti_specific	Seawater_specific	Akenti_specific	15	67	0	119	inf	6.30475e-07	1.02461e-05	15	K09144; uncharacterized protein
K09857	Akenti_specific	Seawater_specific	Akenti_specific	15	67	0	119	inf	6.30475e-07	1.02461e-05	15	K09857; uncharacterized protein
K09909	Akenti_specific	Seawater_specific	Akenti_specific	15	67	0	119	inf	6.30475e-07	1.02461e-05	15	K09909; uncharacterized protein
K18906	Akenti_specific	Seawater_specific	Akenti_specific	15	67	0	119	inf	6.30475e-07	1.02461e-05	15	mgrA; MarR family transcriptional regulator, multiple gene regulator MgrA
K15577	Akenti_specific	Seawater_specific	Akenti_specific	15	67	0	119	inf	6.30475e-07	1.02461e-05	15	nrtB, nasE, cynB; nitrate/nitrite transport system permease protein
K15578	Akenti_specific	Seawater_specific	Akenti_specific	15	67	0	119	inf	6.30475e-07	1.02461e-05	15	nrtC, nasD; nitrate/nitrite transport system ATP-binding protein [EC:3.6.3.-]
K02673	Akenti_specific	Seawater_specific	Akenti_specific	15	67	0	119	inf	6.30475e-07	1.02461e-05	15	pilX; type IV pilus assembly protein PilX
K03748	Akenti_specific	Seawater_specific	Akenti_specific	15	67	0	119	inf	6.30475e-07	1.02461e-05	15	sanA; SanA protein
K09773	Akenti_specific	Seawater_specific	Akenti_specific	32	50	11	108	6.28364	5.71287e-07	9.82165e-06	21	ppsR; [pyruvate, water dikinase]-phosphate phosphotransferase / [pyruvate, water dikinase] kinase [EC:2.7.4.28 2.7.11.33]
K01613	Akenti_specific	Seawater_specific	Akenti_specific	69	13	59	60	5.39765	5.72041e-07	9.82165e-06	10	psd, PISD; phosphatidylserine decarboxylase [EC:4.1.1.65]
K03616	Akenti_specific	Seawater_specific	Akenti_specific	32	50	11	108	6.28364	5.71287e-07	9.82165e-06	21	rnfB; Na+-translocating ferredoxin:NAD+ oxidoreductase subunit B [EC:7.2.1.2]
K01724	Akenti_specific	Seawater_specific	Seawater_specific	47	35	106	13	0.16469	4.93421e-07	8.5442e-06	-59	PCBD, phhB; 4a-hydroxytetrahydrobiopterin dehydratase [EC:4.2.1.96]
K09007	Akenti_specific	Seawater_specific	Akenti_specific	29	53	8	111	7.59198	4.84483e-07	8.41339e-06	21	folE2; GTP cyclohydrolase IB [EC:3.5.4.16]
K09801	Akenti_specific	Seawater_specific	Akenti_specific	29	53	8	111	7.59198	4.84483e-07	8.41339e-06	21	K09801; uncharacterized protein
K03732	Akenti_specific	Seawater_specific	Akenti_specific	29	53	8	111	7.59198	4.84483e-07	8.41339e-06	21	rhlB; ATP-dependent RNA helicase RhlB [EC:3.6.4.13]
K04091	Akenti_specific	Seawater_specific	Seawater_specific	3	79	37	82	0.0841601	4.81112e-07	8.41339e-06	-34	ssuD; alkanesulfonate monooxygenase [EC:1.14.14.5]
K07258	Akenti_specific	Seawater_specific	Akenti_specific	50	32	30	89	4.63542	4.76854e-07	8.37665e-06	20	dacC, dacA, dacD; serine-type D-Ala-D-Ala carboxypeptidase (penicillin-binding protein 5/6) [EC:3.4.16.4]
K19560	Akenti_specific	Seawater_specific	Seawater_specific	0	82	26	93	0	4.52506e-07	7.97198e-06	-26	bioK; pimeloyl-[acyl-carrier protein] methyl ester esterase [EC:3.1.1.85]
K02290	Akenti_specific	Seawater_specific	Seawater_specific	0	82	26	93	0	4.52506e-07	7.97198e-06	-26	cpcG; phycobilisome rod-core linker protein
K05380	Akenti_specific	Seawater_specific	Seawater_specific	0	82	26	93	0	4.52506e-07	7.97198e-06	-26	cpeE; phycoerythrin-associated linker protein
K03692	Akenti_specific	Seawater_specific	Seawater_specific	0	82	26	93	0	4.52506e-07	7.97198e-06	-26	E2.4.1.213; glucosylglycerol-phosphate synthase [EC:2.4.1.213]
K09942	Akenti_specific	Seawater_specific	Seawater_specific	0	82	26	93	0	4.52506e-07	7.97198e-06	-26	K09942; uncharacterized protein
K14330	Akenti_specific	Seawater_specific	Seawater_specific	0	82	26	93	0	4.52506e-07	7.97198e-06	-26	K14330; fatty aldehyde-generating acyl-ACP reductase [EC:1.2.1.80]
K05585	Akenti_specific	Seawater_specific	Seawater_specific	0	82	26	93	0	4.52506e-07	7.97198e-06	-26	ndhN; NAD(P)H-quinone oxidoreductase subunit N [EC:7.1.1.2]
K03640	Akenti_specific	Seawater_specific	Akenti_specific	60	22	44	75	4.64876	4.33535e-07	7.97198e-06	16	pal; peptidoglycan-associated lipoprotein
K03473	Akenti_specific	Seawater_specific	Akenti_specific	30	52	9	110	7.05128	4.39321e-07	7.97198e-06	21	pdxB; erythronate-4-phosphate dehydrogenase [EC:1.1.1.290]
K02643	Akenti_specific	Seawater_specific	Seawater_specific	0	82	26	93	0	4.52506e-07	7.97198e-06	-26	petM; cytochrome b6-f complex subunit 7
K02694	Akenti_specific	Seawater_specific	Seawater_specific	0	82	26	93	0	4.52506e-07	7.97198e-06	-26	psaF; photosystem I subunit III
K02696	Akenti_specific	Seawater_specific	Seawater_specific	0	82	26	93	0	4.52506e-07	7.97198e-06	-26	psaI; photosystem I subunit VIII
K02698	Akenti_specific	Seawater_specific	Seawater_specific	0	82	26	93	0	4.52506e-07	7.97198e-06	-26	psaK; photosystem I subunit X
K02699	Akenti_specific	Seawater_specific	Seawater_specific	0	82	26	93	0	4.52506e-07	7.97198e-06	-26	psaL; photosystem I subunit XI
K02712	Akenti_specific	Seawater_specific	Seawater_specific	0	82	26	93	0	4.52506e-07	7.97198e-06	-26	psbK; photosystem II PsbK protein
K02714	Akenti_specific	Seawater_specific	Seawater_specific	0	82	26	93	0	4.52506e-07	7.97198e-06	-26	psbM; photosystem II PsbM protein
K02720	Akenti_specific	Seawater_specific	Seawater_specific	0	82	26	93	0	4.52506e-07	7.97198e-06	-26	psbV; photosystem II cytochrome c550
K02722	Akenti_specific	Seawater_specific	Seawater_specific	0	82	26	93	0	4.52506e-07	7.97198e-06	-26	psbX; photosystem II PsbX protein
K06955	Akenti_specific	Seawater_specific	Seawater_specific	15	67	64	55	0.192397	4.09695e-07	7.61506e-06	-49	K06955; uncharacterized protein
K02454	Akenti_specific	Seawater_specific	Akenti_specific	39	43	17	102	5.44186	3.94687e-07	7.35862e-06	22	gspE; general secretion pathway protein E
K08259	Akenti_specific	Seawater_specific	Akenti_specific	39	43	17	102	5.44186	3.94687e-07	7.35862e-06	22	lytM; lysostaphin [EC:3.4.24.75]
K00992	Akenti_specific	Seawater_specific	Akenti_specific	39	43	17	102	5.44186	3.94687e-07	7.35862e-06	22	murU; N-acetyl-alpha-D-muramate 1-phosphate uridylyltransferase [EC:2.7.7.99]
K03437	Akenti_specific	Seawater_specific	Seawater_specific	25	57	80	39	0.213816	3.7477e-07	7.05218e-06	-55	spoU; RNA methyltransferase, TrmH family
K02016	Akenti_specific	Seawater_specific	Akenti_specific	54	28	35	84	4.62857	3.61868e-07	6.86395e-06	19	ABC.FEV.S; iron complex transport system substrate-binding protein
K01792	Akenti_specific	Seawater_specific	Akenti_specific	18	64	1	118	33.1875	3.63638e-07	6.86395e-06	17	E5.1.3.15; glucose-6-phosphate 1-epimerase [EC:5.1.3.15]
K06445	Akenti_specific	Seawater_specific	Akenti_specific	18	64	1	118	33.1875	3.63638e-07	6.86395e-06	17	fadE; acyl-CoA dehydrogenase [EC:1.3.99.-]
K09794	Akenti_specific	Seawater_specific	Akenti_specific	18	64	1	118	33.1875	3.63638e-07	6.86395e-06	17	K09794; uncharacterized protein
K09912	Akenti_specific	Seawater_specific	Akenti_specific	20	62	2	117	18.871	3.62638e-07	6.86395e-06	18	K09912; uncharacterized protein
K18828	Akenti_specific	Seawater_specific	Akenti_specific	18	64	1	118	33.1875	3.63638e-07	6.86395e-06	17	mvpA, vapC; tRNA(fMet)-specific endonuclease VapC [EC:3.1.-.-]
K03656	Akenti_specific	Seawater_specific	Akenti_specific	20	62	2	117	18.871	3.62638e-07	6.86395e-06	18	rep; ATP-dependent DNA helicase Rep [EC:3.6.4.12]
K00878	Akenti_specific	Seawater_specific	Akenti_specific	18	64	1	118	33.1875	3.63638e-07	6.86395e-06	17	thiM; hydroxyethylthiazole kinase [EC:2.7.1.50]
K06871	Akenti_specific	Seawater_specific	Akenti_specific	24	58	4	115	11.8966	2.95445e-07	5.71885e-06	20	K06871; uncharacterized protein
K11719	Akenti_specific	Seawater_specific	Akenti_specific	24	58	4	115	11.8966	2.95445e-07	5.71885e-06	20	lptC; lipopolysaccharide export system protein LptC
K18297	Akenti_specific	Seawater_specific	Akenti_specific	24	58	4	115	11.8966	2.95445e-07	5.71885e-06	20	mexT; LysR family transcriptional regulator, mexEF-oprN operon transcriptional activator
K03455	Akenti_specific	Seawater_specific	Akenti_specific	44	38	22	97	5.10526	2.91661e-07	5.70005e-06	22	TC.KEF; monovalent cation:H+ antiporter-2, CPA2 family
K03973	Akenti_specific	Seawater_specific	Akenti_specific	22	60	3	116	14.1778	2.88295e-07	5.65244e-06	19	pspC; phage shock protein C
K03407	Akenti_specific	Seawater_specific	Akenti_specific	28	54	7	112	8.2963	2.83446e-07	5.57536e-06	21	cheA; two-component system, chemotaxis family, sensor kinase CheA [EC:2.7.13.3]
K07121	Akenti_specific	Seawater_specific	Akenti_specific	28	54	7	112	8.2963	2.83446e-07	5.57536e-06	21	K07121; uncharacterized protein
K00477	Akenti_specific	Seawater_specific	Seawater_specific	3	79	38	81	0.080946	2.4023e-07	4.75608e-06	-35	PHYH; phytanoyl-CoA hydroxylase [EC:1.14.11.18]
K03414	Akenti_specific	Seawater_specific	Akenti_specific	16	66	0	119	inf	2.27107e-07	4.51096e-06	16	cheZ; chemotaxis protein CheZ
K06598	Akenti_specific	Seawater_specific	Akenti_specific	16	66	0	119	inf	2.27107e-07	4.51096e-06	16	chpC; chemosensory pili system protein ChpC
K03673	Akenti_specific	Seawater_specific	Akenti_specific	30	52	8	111	8.00481	2.18683e-07	4.51096e-06	22	dsbA; thiol:disulfide interchange protein DsbA
K21025	Akenti_specific	Seawater_specific	Akenti_specific	16	66	0	119	inf	2.27107e-07	4.51096e-06	16	fimX; multidomain signaling protein FimX
K02413	Akenti_specific	Seawater_specific	Akenti_specific	16	66	0	119	inf	2.27107e-07	4.51096e-06	16	fliJ; flagellar FliJ protein
K07075	Akenti_specific	Seawater_specific	Akenti_specific	16	66	0	119	inf	2.27107e-07	4.51096e-06	16	K07075; uncharacterized protein
K07317	Akenti_specific	Seawater_specific	Akenti_specific	16	66	0	119	inf	2.27107e-07	4.51096e-06	16	K07317; adenine-specific DNA-methyltransferase [EC:2.1.1.72]
K07484	Akenti_specific	Seawater_specific	Akenti_specific	16	66	0	119	inf	2.27107e-07	4.51096e-06	16	K07484; transposase
K07726	Akenti_specific	Seawater_specific	Akenti_specific	16	66	0	119	inf	2.27107e-07	4.51096e-06	16	K07726; putative transcriptional regulator
K09978	Akenti_specific	Seawater_specific	Akenti_specific	16	66	0	119	inf	2.27107e-07	4.51096e-06	16	K09978; uncharacterized protein
K14331	Akenti_specific	Seawater_specific	Seawater_specific	0	82	27	92	0	2.23487e-07	4.51096e-06	-27	K14331; fatty aldehyde decarbonylase [EC:4.1.99.5]
K08480	Akenti_specific	Seawater_specific	Seawater_specific	0	82	27	92	0	2.23487e-07	4.51096e-06	-27	kaiA; circadian clock protein KaiA
K03781	Akenti_specific	Seawater_specific	Akenti_specific	16	66	0	119	inf	2.27107e-07	4.51096e-06	16	katE, CAT, catB, srpA; catalase [EC:1.11.1.6]
K11748	Akenti_specific	Seawater_specific	Akenti_specific	16	66	0	119	inf	2.27107e-07	4.51096e-06	16	kefG; glutathione-regulated potassium-efflux system ancillary protein KefG
K00641	Akenti_specific	Seawater_specific	Akenti_specific	46	36	24	95	5.05787	2.10024e-07	4.51096e-06	22	metX; homoserine O-acetyltransferase/O-succinyltransferase [EC:2.3.1.31 2.3.1.46]
K20024	Akenti_specific	Seawater_specific	Seawater_specific	0	82	27	92	0	2.23487e-07	4.51096e-06	-27	mgdE; monoglucosyldiacylglycerol epimerase [EC:5.1.3.34]
K18805	Akenti_specific	Seawater_specific	Seawater_specific	0	82	27	92	0	2.23487e-07	4.51096e-06	-27	NA
K05575	Akenti_specific	Seawater_specific	Seawater_specific	0	82	27	92	0	2.23487e-07	4.51096e-06	-27	ndhD; NAD(P)H-quinone oxidoreductase subunit 4 [EC:7.1.1.2]
K02634	Akenti_specific	Seawater_specific	Seawater_specific	0	82	27	92	0	2.23487e-07	4.51096e-06	-27	petA; apocytochrome f
K08906	Akenti_specific	Seawater_specific	Seawater_specific	0	82	27	92	0	2.23487e-07	4.51096e-06	-27	petJ; cytochrome c6
K07190	Akenti_specific	Seawater_specific	Seawater_specific	0	82	27	92	0	2.23487e-07	4.51096e-06	-27	PHKA_B; phosphorylase kinase alpha/beta subunit
K02657	Akenti_specific	Seawater_specific	Akenti_specific	16	66	0	119	inf	2.27107e-07	4.51096e-06	16	pilG; twitching motility two-component system response regulator PilG
K01058	Akenti_specific	Seawater_specific	Akenti_specific	16	66	0	119	inf	2.27107e-07	4.51096e-06	16	pldA; phospholipase A1/A2 [EC:3.1.1.32 3.1.1.4]
K08903	Akenti_specific	Seawater_specific	Seawater_specific	0	82	27	92	0	2.23487e-07	4.51096e-06	-27	psb28; photosystem II 13kDa protein
K02716	Akenti_specific	Seawater_specific	Seawater_specific	0	82	27	92	0	2.23487e-07	4.51096e-06	-27	psbO; photosystem II oxygen-evolving enhancer protein 1
K07862	Akenti_specific	Seawater_specific	Akenti_specific	16	66	0	119	inf	2.27107e-07	4.51096e-06	16	sstT; serine/threonine transporter
K05978	Akenti_specific	Seawater_specific	Seawater_specific	0	82	27	92	0	2.23487e-07	4.51096e-06	-27	stpA; glucosylglycerol 3-phosphatase [EC:3.1.3.69]
K08990	Akenti_specific	Seawater_specific	Akenti_specific	16	66	0	119	inf	2.27107e-07	4.51096e-06	16	ycjF; putative membrane protein
K17623	Akenti_specific	Seawater_specific	Seawater_specific	2	80	35	84	0.06	2.02972e-07	4.43763e-06	-33	HDHD1; pseudouridine 5'-phosphatase [EC:3.1.3.96]
K03517	Akenti_specific	Seawater_specific	Akenti_specific	62	20	46	73	4.91957	2.02433e-07	4.43763e-06	16	nadA; quinolinate synthase [EC:2.5.1.72]
K12339	Akenti_specific	Seawater_specific	Akenti_specific	31	51	9	110	7.42919	1.86311e-07	4.10288e-06	22	cysM; S-sulfo-L-cysteine synthase (O-acetyl-L-serine-dependent) [EC:2.5.1.144]
K09966	Akenti_specific	Seawater_specific	Seawater_specific	26	56	83	36	0.201377	1.49989e-07	3.31503e-06	-57	K09966; uncharacterized protein
K18928	Akenti_specific	Seawater_specific	Akenti_specific	21	61	2	117	20.1393	1.37153e-07	3.04239e-06	19	lldE; L-lactate dehydrogenase complex protein LldE
K12510	Akenti_specific	Seawater_specific	Akenti_specific	21	61	2	117	20.1393	1.37153e-07	3.04239e-06	19	tadB; tight adherence protein B
K02123	Akenti_specific	Seawater_specific	Akenti_specific	19	63	1	118	35.5873	1.34363e-07	3.00241e-06	18	ATPVI, ntpI, atpI; V/A-type H+/Na+-transporting ATPase subunit I
K07062	Akenti_specific	Seawater_specific	Akenti_specific	19	63	1	118	35.5873	1.34363e-07	3.00241e-06	18	fitB; toxin FitB [EC:3.1.-.-]
K02410	Akenti_specific	Seawater_specific	Akenti_specific	45	37	22	97	5.36241	1.32953e-07	3.00241e-06	23	fliG; flagellar motor switch protein FliG
K07481	Akenti_specific	Seawater_specific	Akenti_specific	19	63	1	118	35.5873	1.34363e-07	3.00241e-06	18	K07481; transposase, IS5 family
K12543	Akenti_specific	Seawater_specific	Akenti_specific	19	63	1	118	35.5873	1.34363e-07	3.00241e-06	18	lapE; outer membrane protein, adhesin transport system
K02658	Akenti_specific	Seawater_specific	Akenti_specific	19	63	1	118	35.5873	1.34363e-07	3.00241e-06	18	pilH; twitching motility two-component system response regulator PilH
K02919	Akenti_specific	Seawater_specific	Akenti_specific	65	17	50	69	5.27647	1.31694e-07	3.00241e-06	15	RP-L36, MRPL36, rpmJ; large subunit ribosomal protein L36
K08084	Akenti_specific	Seawater_specific	Akenti_specific	25	57	4	115	12.6096	1.27718e-07	2.92933e-06	21	fimT; type IV fimbrial biogenesis protein FimT
K02482	Akenti_specific	Seawater_specific	Akenti_specific	25	57	4	115	12.6096	1.27718e-07	2.92933e-06	21	K02482; two-component system, NtrC family, sensor kinase [EC:2.7.13.3]
K07133	Akenti_specific	Seawater_specific	Akenti_specific	25	57	4	115	12.6096	1.27718e-07	2.92933e-06	21	K07133; uncharacterized protein
K10679	Akenti_specific	Seawater_specific	Akenti_specific	25	57	4	115	12.6096	1.27718e-07	2.92933e-06	21	nfnB, nfsB; nitroreductase / dihydropteridine reductase [EC:1.-.-.- 1.5.1.34]
K02670	Akenti_specific	Seawater_specific	Akenti_specific	25	57	4	115	12.6096	1.27718e-07	2.92933e-06	21	pilU; twitching motility protein PilU
K03547	Akenti_specific	Seawater_specific	Akenti_specific	25	57	4	115	12.6096	1.27718e-07	2.92933e-06	21	sbcD, mre11; DNA repair protein SbcD/Mre11
K09014	Akenti_specific	Seawater_specific	Seawater_specific	46	36	106	13	0.156709	1.20561e-07	2.82923e-06	-60	sufB; Fe-S cluster assembly protein SufB
K06186	Akenti_specific	Seawater_specific	Akenti_specific	29	53	7	112	8.75472	1.17886e-07	2.77718e-06	22	bamE, smpA; outer membrane protein assembly factor BamE
K03408	Akenti_specific	Seawater_specific	Akenti_specific	29	53	7	112	8.75472	1.17886e-07	2.77718e-06	22	cheW; purine-binding chemotaxis protein CheW
K02397	Akenti_specific	Seawater_specific	Akenti_specific	29	53	7	112	8.75472	1.17886e-07	2.77718e-06	22	flgL; flagellar hook-associated protein 3 FlgL
K03466	Akenti_specific	Seawater_specific	Akenti_specific	76	6	72	47	8.26852	1.14162e-07	2.72109e-06	4	ftsK, spoIIIE; DNA segregation ATPase FtsK/SpoIIIE, S-DNA-T family
K05382	Akenti_specific	Seawater_specific	Seawater_specific	0	82	28	91	0	1.11614e-07	2.67083e-06	-28	cpeS; phycoerythrin-associated linker protein
K05383	Akenti_specific	Seawater_specific	Seawater_specific	0	82	28	91	0	1.11614e-07	2.67083e-06	-28	cpeT; CpeT protein
K02676	Akenti_specific	Seawater_specific	Akenti_specific	23	59	3	116	15.0734	1.10668e-07	2.66922e-06	20	pilZ; type IV pilus assembly protein PilZ
K06213	Akenti_specific	Seawater_specific	Akenti_specific	73	9	65	54	6.73846	1.03561e-07	2.50776e-06	8	mgtE; magnesium transporter
K16264	Akenti_specific	Seawater_specific	Akenti_specific	31	51	8	111	8.43382	9.92676e-08	2.41339e-06	23	czcD, zitB; cobalt-zinc-cadmium efflux system protein
K14393	Akenti_specific	Seawater_specific	Akenti_specific	47	35	24	95	5.31548	9.27841e-08	2.26483e-06	23	actP; cation/acetate symporter
K00060	Akenti_specific	Seawater_specific	Akenti_specific	47	35	24	95	5.31548	9.27841e-08	2.26483e-06	23	tdh; threonine 3-dehydrogenase [EC:1.1.1.103]
K02556	Akenti_specific	Seawater_specific	Akenti_specific	46	36	23	96	5.33333	8.85547e-08	2.17909e-06	23	motA; chemotaxis protein MotA
K06381	Akenti_specific	Seawater_specific	Seawater_specific	7	75	50	69	0.1288	8.47975e-08	2.09512e-06	-43	spoIID; stage II sporulation protein D
K07341	Akenti_specific	Seawater_specific	Akenti_specific	17	65	0	119	inf	8.10218e-08	2.01e-06	17	doc; death on curing protein
K06918	Akenti_specific	Seawater_specific	Akenti_specific	17	65	0	119	inf	8.10218e-08	2.01e-06	17	K06918; uncharacterized protein
K07231	Akenti_specific	Seawater_specific	Akenti_specific	17	65	0	119	inf	8.10218e-08	2.01e-06	17	K07231; putative iron-regulated protein
K02659	Akenti_specific	Seawater_specific	Akenti_specific	17	65	0	119	inf	8.10218e-08	2.01e-06	17	pilI; twitching motility protein PilI
K02777	Akenti_specific	Seawater_specific	Akenti_specific	17	65	0	119	inf	8.10218e-08	2.01e-06	17	PTS-Glc-EIIA, crr; PTS system, sugar-specific IIA component [EC:2.7.1.-]
K03311	Akenti_specific	Seawater_specific	Akenti_specific	17	65	0	119	inf	8.10218e-08	2.01e-06	17	TC.LIVCS; branched-chain amino acid:cation transporter, LIVCS family
K19157	Akenti_specific	Seawater_specific	Akenti_specific	17	65	0	119	inf	8.10218e-08	2.01e-06	17	yafQ; mRNA interferase YafQ [EC:3.1.-.-]
K03561	Akenti_specific	Seawater_specific	Akenti_specific	58	24	38	81	5.15132	7.46013e-08	1.90515e-06	20	exbB; biopolymer transport protein ExbB
K10804	Akenti_specific	Seawater_specific	Akenti_specific	55	27	34	85	5.09259	7.22748e-08	1.85353e-06	21	tesA; acyl-CoA thioesterase I [EC:3.1.2.- 3.1.1.5]
K00555	Akenti_specific	Seawater_specific	Seawater_specific	1	81	33	86	0.0321736	6.96826e-08	1.79462e-06	-32	TRMT1, trm1; tRNA (guanine26-N2/guanine27-N2)-dimethyltransferase [EC:2.1.1.215 2.1.1.216]
K02420	Akenti_specific	Seawater_specific	Akenti_specific	43	39	19	100	5.80297	6.59414e-08	1.7055e-06	24	fliQ; flagellar biosynthetic protein FliQ
K02421	Akenti_specific	Seawater_specific	Akenti_specific	43	39	19	100	5.80297	6.59414e-08	1.7055e-06	24	fliR; flagellar biosynthetic protein FliR
K00640	Akenti_specific	Seawater_specific	Akenti_specific	64	18	47	72	5.44681	6.35371e-08	1.65742e-06	17	cysE; serine O-acetyltransferase [EC:2.3.1.30]
K04759	Akenti_specific	Seawater_specific	Akenti_specific	46	36	22	97	5.63384	6.05067e-08	1.58517e-06	24	feoB; ferrous iron transport protein B
K09816	Akenti_specific	Seawater_specific	Akenti_specific	46	36	22	97	5.63384	6.05067e-08	1.58517e-06	24	znuB; zinc transport system permease protein
K03405	Akenti_specific	Seawater_specific	Seawater_specific	12	70	61	58	0.162998	5.99488e-08	1.58421e-06	-49	chlI, bchI; magnesium chelatase subunit I [EC:6.6.1.1]
K03590	Akenti_specific	Seawater_specific	Akenti_specific	70	12	58	61	6.13506	5.99488e-08	1.58421e-06	12	ftsA; cell division protein FtsA
K14682	Akenti_specific	Seawater_specific	Akenti_specific	34	48	10	109	7.72083	5.842e-08	1.55735e-06	24	argAB; amino-acid N-acetyltransferase [EC:2.3.1.1]
K07184	Akenti_specific	Seawater_specific	Akenti_specific	26	56	4	115	13.3482	5.5831e-08	1.49489e-06	22	ygiM; SH3 domain protein
K06142	Akenti_specific	Seawater_specific	Akenti_specific	54	28	32	87	5.2433	5.4102e-08	1.45501e-06	22	hlpA, ompH; outer membrane protein
K07483	Akenti_specific	Seawater_specific	Akenti_specific	22	60	2	117	21.45	5.11329e-08	1.38127e-06	20	K07483; transposase
K09916	Akenti_specific	Seawater_specific	Akenti_specific	22	60	2	117	21.45	5.11329e-08	1.38127e-06	20	K09916; uncharacterized protein
K05365	Akenti_specific	Seawater_specific	Akenti_specific	22	60	2	117	21.45	5.11329e-08	1.38127e-06	20	mrcB; penicillin-binding protein 1B [EC:2.4.1.129 3.4.16.4]
K02674	Akenti_specific	Seawater_specific	Akenti_specific	22	60	2	117	21.45	5.11329e-08	1.38127e-06	20	pilY1; type IV pilus assembly protein PilY1
K03451	Akenti_specific	Seawater_specific	Akenti_specific	22	60	2	117	21.45	5.11329e-08	1.38127e-06	20	TC.BCT; betaine/carnitine transporter, BCCT family
K00912	Akenti_specific	Seawater_specific	Akenti_specific	70	12	57	62	6.34503	4.93114e-08	1.36234e-06	13	lpxK; tetraacyldisaccharide 4'-kinase [EC:2.7.1.130]
K12267	Akenti_specific	Seawater_specific	Akenti_specific	20	62	1	118	38.0645	4.9026e-08	1.36064e-06	19	msrAB; peptide methionine sulfoxide reductase msrA/msrB [EC:1.8.4.11 1.8.4.12]
K08483	Akenti_specific	Seawater_specific	Akenti_specific	30	52	7	112	9.23077	4.86789e-08	1.3572e-06	23	PTS-EI.PTSI, ptsI; phosphotransferase system, enzyme I, PtsI [EC:2.7.3.9]
K00788	Akenti_specific	Seawater_specific	Akenti_specific	67	15	52	67	5.75513	4.85433e-08	1.3572e-06	15	thiE; thiamine-phosphate pyrophosphorylase [EC:2.5.1.3]
K03978	Akenti_specific	Seawater_specific	Akenti_specific	76	6	70	49	8.86667	4.70771e-08	1.3247e-06	6	engB; GTP-binding protein
K09118	Akenti_specific	Seawater_specific	Seawater_specific	2	80	38	81	0.0532895	4.54679e-08	1.28537e-06	-36	K09118; uncharacterized protein
K02666	Akenti_specific	Seawater_specific	Akenti_specific	35	47	11	108	7.31141	4.34878e-08	1.23514e-06	24	pilQ; type IV pilus assembly protein PilQ
K03089	Akenti_specific	Seawater_specific	Akenti_specific	51	31	28	91	5.34677	4.11251e-08	1.19347e-06	23	rpoH; RNA polymerase sigma-32 factor
K03598	Akenti_specific	Seawater_specific	Akenti_specific	24	58	3	116	16	4.18244e-08	1.19347e-06	21	rseB; sigma-E factor negative regulatory protein RseB
K03803	Akenti_specific	Seawater_specific	Akenti_specific	24	58	3	116	16	4.18244e-08	1.19347e-06	21	rseC; sigma-E factor negative regulatory protein RseC
K06013	Akenti_specific	Seawater_specific	Akenti_specific	24	58	3	116	16	4.18244e-08	1.19347e-06	21	STE24; STE24 endopeptidase [EC:3.4.24.84]
K03152	Akenti_specific	Seawater_specific	Akenti_specific	24	58	3	116	16	4.18244e-08	1.19347e-06	21	thiJ; protein deglycase [EC:3.5.1.124]
K07391	Akenti_specific	Seawater_specific	Akenti_specific	71	11	59	60	6.56394	3.91049e-08	1.14269e-06	12	comM; magnesium chelatase family protein
K02400	Akenti_specific	Seawater_specific	Akenti_specific	47	35	23	96	5.60497	3.74171e-08	1.09865e-06	24	flhA; flagellar biosynthesis protein FlhA
K05589	Akenti_specific	Seawater_specific	Akenti_specific	33	49	9	110	8.23129	3.26209e-08	9.62476e-07	24	ftsB; cell division protein FtsB
K00661	Akenti_specific	Seawater_specific	Akenti_specific	33	49	9	110	8.23129	3.26209e-08	9.62476e-07	24	maa; maltose O-acetyltransferase [EC:2.3.1.79]
K11085	Akenti_specific	Seawater_specific	Akenti_specific	69	13	55	64	6.17622	3.24951e-08	9.62476e-07	14	msbA; ATP-binding cassette, subfamily B, bacterial MsbA [EC:3.6.3.-]
K19736	Akenti_specific	Seawater_specific	Akenti_specific	18	64	0	119	inf	2.86218e-08	8.56963e-07	18	aefR; TetR/AcrR family transcriptional regulator, regulator of autoinduction and epiphytic fitness
K08083	Akenti_specific	Seawater_specific	Akenti_specific	18	64	0	119	inf	2.86218e-08	8.56963e-07	18	algR; two-component system, LytTR family, response regulator AlgR
K02280	Akenti_specific	Seawater_specific	Akenti_specific	18	64	0	119	inf	2.86218e-08	8.56963e-07	18	cpaC, rcpA; pilus assembly protein CpaC
K01155	Akenti_specific	Seawater_specific	Akenti_specific	18	64	0	119	inf	2.86218e-08	8.56963e-07	18	E3.1.21.4; type II restriction enzyme [EC:3.1.21.4]
K05982	Akenti_specific	Seawater_specific	Akenti_specific	18	64	0	119	inf	2.86218e-08	8.56963e-07	18	E3.1.21.7, nfi; deoxyribonuclease V [EC:3.1.21.7]
K03814	Akenti_specific	Seawater_specific	Akenti_specific	18	64	0	119	inf	2.86218e-08	8.56963e-07	18	mtgA; monofunctional glycosyltransferase [EC:2.4.1.129]
K18829	Akenti_specific	Seawater_specific	Akenti_specific	18	64	0	119	inf	2.86218e-08	8.56963e-07	18	mvpT, vapB; antitoxin VapB
K15916	Akenti_specific	Seawater_specific	Seawater_specific	0	82	30	89	0	2.84938e-08	8.56963e-07	-30	pgi-pmi; glucose/mannose-6-phosphate isomerase [EC:5.3.1.9 5.3.1.8]
K02390	Akenti_specific	Seawater_specific	Akenti_specific	41	41	16	103	6.4375	2.70158e-08	8.42063e-07	25	flgE; flagellar hook protein FlgE
K08305	Akenti_specific	Seawater_specific	Akenti_specific	49	33	25	94	5.58303	2.65461e-08	8.31688e-07	24	mltB; membrane-bound lytic murein transglycosylase B [EC:4.2.2.-]
K06179	Akenti_specific	Seawater_specific	Akenti_specific	49	33	25	94	5.58303	2.65461e-08	8.31688e-07	24	rluC; 23S rRNA pseudouridine955/2504/2580 synthase [EC:5.4.99.24]
K03562	Akenti_specific	Seawater_specific	Akenti_specific	54	28	31	88	5.47465	2.34261e-08	7.41581e-07	23	tolQ; biopolymer transport protein TolQ
K00631	Akenti_specific	Seawater_specific	Akenti_specific	28	54	5	114	11.8222	2.22053e-08	7.06618e-07	23	plsB; glycerol-3-phosphate O-acyltransferase [EC:2.3.1.15]
K02391	Akenti_specific	Seawater_specific	Akenti_specific	32	50	8	111	8.88	2.16123e-08	6.91366e-07	24	flgF; flagellar basal-body rod protein FlgF
K03413	Akenti_specific	Seawater_specific	Akenti_specific	38	44	13	106	7.04196	2.09644e-08	6.74189e-07	25	cheY; two-component system, chemotaxis family, chemotaxis protein CheY
K02456	Akenti_specific	Seawater_specific	Akenti_specific	38	44	13	106	7.04196	2.09644e-08	6.74189e-07	25	gspG; general secretion pathway protein G
K03495	Akenti_specific	Seawater_specific	Akenti_specific	73	9	62	57	7.45699	1.97598e-08	6.42246e-07	11	gidA, mnmG, MTO1; tRNA uridine 5-carboxymethylaminomethyl modification enzyme
K04096	Akenti_specific	Seawater_specific	Akenti_specific	73	9	62	57	7.45699	1.97598e-08	6.42246e-07	11	smf; DNA processing protein
K02409	Akenti_specific	Seawater_specific	Akenti_specific	45	37	20	99	6.02027	1.9363e-08	6.36155e-07	25	fliF; flagellar M-ring protein FliF
K02417	Akenti_specific	Seawater_specific	Akenti_specific	45	37	20	99	6.02027	1.9363e-08	6.36155e-07	25	fliNY, fliN; flagellar motor switch protein FliN/FliY
K02196	Akenti_specific	Seawater_specific	Akenti_specific	23	59	2	117	22.8051	1.87927e-08	6.24163e-07	21	ccmD; heme exporter protein D
K02283	Akenti_specific	Seawater_specific	Akenti_specific	23	59	2	117	22.8051	1.87927e-08	6.24163e-07	21	cpaF, tadA; pilus assembly protein CpaF
K03528	Akenti_specific	Seawater_specific	Akenti_specific	23	59	2	117	22.8051	1.87927e-08	6.24163e-07	21	zipA; cell division protein ZipA
K00835	Akenti_specific	Seawater_specific	Akenti_specific	21	61	1	118	40.623	1.76648e-08	5.96482e-07	20	avtA; valine--pyruvate aminotransferase [EC:2.6.1.66]
K06518	Akenti_specific	Seawater_specific	Akenti_specific	21	61	1	118	40.623	1.76648e-08	5.96482e-07	20	cidA; holin-like protein
K01758	Akenti_specific	Seawater_specific	Seawater_specific	7	75	53	66	0.116226	1.75133e-08	5.96482e-07	-46	CTH; cystathionine gamma-lyase [EC:4.4.1.1]
K16012	Akenti_specific	Seawater_specific	Akenti_specific	21	61	1	118	40.623	1.76648e-08	5.96482e-07	20	cydC; ATP-binding cassette, subfamily C, bacterial CydC
K16013	Akenti_specific	Seawater_specific	Akenti_specific	21	61	1	118	40.623	1.76648e-08	5.96482e-07	20	cydD; ATP-binding cassette, subfamily C, bacterial CydD
K07154	Akenti_specific	Seawater_specific	Akenti_specific	21	61	1	118	40.623	1.76648e-08	5.96482e-07	20	hipA; serine/threonine-protein kinase HipA [EC:2.7.11.1]
K09765	Akenti_specific	Seawater_specific	Akenti_specific	21	61	1	118	40.623	1.76648e-08	5.96482e-07	20	queH; epoxyqueuosine reductase [EC:1.17.99.6]
K07689	Akenti_specific	Seawater_specific	Akenti_specific	25	57	3	116	16.9591	1.55628e-08	5.46765e-07	22	uvrY, gacA, varA; two-component system, NarL family, invasion response regulator UvrY
K03147	Akenti_specific	Seawater_specific	Akenti_specific	47	35	22	97	5.92078	1.51217e-08	5.34359e-07	25	thiC; phosphomethylpyrimidine synthase [EC:4.1.99.17]
K02422	Akenti_specific	Seawater_specific	Akenti_specific	34	48	9	110	8.65741	1.35593e-08	4.81951e-07	25	fliS; flagellar protein FliS
K03617	Akenti_specific	Seawater_specific	Akenti_specific	34	48	9	110	8.65741	1.35593e-08	4.81951e-07	25	rnfA; Na+-translocating ferredoxin:NAD+ oxidoreductase subunit A
K03615	Akenti_specific	Seawater_specific	Akenti_specific	34	48	9	110	8.65741	1.35593e-08	4.81951e-07	25	rnfC; Na+-translocating ferredoxin:NAD+ oxidoreductase subunit C [EC:7.2.1.2]
K03497	Akenti_specific	Seawater_specific	Akenti_specific	78	4	73	46	12.2877	1.32309e-08	4.78673e-07	5	parB, spo0J; chromosome partitioning protein, ParB family
K03286	Akenti_specific	Seawater_specific	Akenti_specific	40	42	14	105	7.14286	1.2868e-08	4.68334e-07	26	TC.OOP; OmpA-OmpF porin, OOP family
K18814	Akenti_specific	Seawater_specific	Seawater_specific	3	79	43	76	0.067118	1.23113e-08	4.50772e-07	-40	ictB; putative inorganic carbon (hco3(-)) transporter
K03558	Akenti_specific	Seawater_specific	Akenti_specific	57	25	34	85	5.7	1.18905e-08	4.38003e-07	23	cvpA; membrane protein required for colicin V production
K03559	Akenti_specific	Seawater_specific	Akenti_specific	57	25	34	85	5.7	1.18905e-08	4.38003e-07	23	exbD; biopolymer transport protein ExbD
K17103	Akenti_specific	Seawater_specific	Akenti_specific	66	16	48	71	6.10156	1.12609e-08	4.19899e-07	18	CHO1, pssA; CDP-diacylglycerol---serine O-phosphatidyltransferase [EC:2.7.8.8]
K08983	Akenti_specific	Seawater_specific	Seawater_specific	0	82	32	87	0	1.11786e-08	4.19405e-07	-32	K08983; putative membrane protein
K03560	Akenti_specific	Seawater_specific	Akenti_specific	54	28	30	89	5.72143	1.01824e-08	3.84401e-07	24	tolR; biopolymer transport protein TolR
K08086	Akenti_specific	Seawater_specific	Akenti_specific	19	63	0	119	inf	1.00098e-08	3.80248e-07	19	fimV; pilus assembly protein FimV
K02388	Akenti_specific	Seawater_specific	Akenti_specific	44	38	18	101	6.49708	9.86243e-09	3.80248e-07	26	flgC; flagellar basal-body rod protein FlgC
K02660	Akenti_specific	Seawater_specific	Akenti_specific	19	63	0	119	inf	1.00098e-08	3.80248e-07	19	pilJ; twitching motility protein PilJ
K02672	Akenti_specific	Seawater_specific	Akenti_specific	19	63	0	119	inf	1.00098e-08	3.80248e-07	19	pilW; type IV pilus assembly protein PilW
K00226	Akenti_specific	Seawater_specific	Akenti_specific	19	63	0	119	inf	1.00098e-08	3.80248e-07	19	pyrD; dihydroorotate dehydrogenase (fumarate) [EC:1.3.98.1]
K02655	Akenti_specific	Seawater_specific	Akenti_specific	29	53	5	114	12.4755	8.8332e-09	3.46375e-07	24	pilE; type IV pilus assembly protein PilE
K16137	Akenti_specific	Seawater_specific	Akenti_specific	39	43	13	106	7.39535	8.62545e-09	3.40425e-07	26	nemR; TetR/AcrR family transcriptional regulator, transcriptional repressor for nem operon
K02387	Akenti_specific	Seawater_specific	Akenti_specific	43	39	17	102	6.61538	8.43889e-09	3.35638e-07	26	flgB; flagellar basal-body rod protein FlgB
K03612	Akenti_specific	Seawater_specific	Akenti_specific	33	49	8	111	9.34439	8.44893e-09	3.35638e-07	25	rnfG; Na+-translocating ferredoxin:NAD+ oxidoreductase subunit G
K02412	Akenti_specific	Seawater_specific	Akenti_specific	46	36	20	99	6.325	7.92569e-09	3.19022e-07	26	fliI; flagellum-specific ATP synthase [EC:7.1.2.2]
K01420	Akenti_specific	Seawater_specific	Akenti_specific	37	45	11	108	8.07273	7.50146e-09	3.03959e-07	26	fnr; CRP/FNR family transcriptional regulator, anaerobic regulatory protein
K07576	Akenti_specific	Seawater_specific	Akenti_specific	24	58	2	117	24.2069	6.80887e-09	2.77747e-07	22	K07576; metallo-beta-lactamase family protein
K03387	Akenti_specific	Seawater_specific	Akenti_specific	22	60	1	118	43.2667	6.285e-09	2.5811e-07	21	ahpF; alkyl hydroperoxide reductase subunit F [EC:1.6.4.-]
K06132	Akenti_specific	Seawater_specific	Akenti_specific	22	60	1	118	43.2667	6.285e-09	2.5811e-07	21	clsC; cardiolipin synthase C [EC:2.7.8.-]
K01425	Akenti_specific	Seawater_specific	Akenti_specific	22	60	1	118	43.2667	6.285e-09	2.5811e-07	21	glsA, GLS; glutaminase [EC:3.5.1.2]
K17286	Akenti_specific	Seawater_specific	Akenti_specific	48	34	22	97	6.2246	6.04104e-09	2.53224e-07	26	STOM; erythrocyte band 7 integral membrane protein
K21029	Akenti_specific	Seawater_specific	Akenti_specific	59	23	36	83	5.91425	5.88507e-09	2.48399e-07	23	moeB; molybdopterin-synthase adenylyltransferase [EC:2.7.7.80]
K01507	Akenti_specific	Seawater_specific	Akenti_specific	59	23	36	83	5.91425	5.88507e-09	2.48399e-07	23	ppa; inorganic pyrophosphatase [EC:3.6.1.1]
K19159	Akenti_specific	Seawater_specific	Akenti_specific	26	56	3	116	17.9524	5.70174e-09	2.4405e-07	23	yefM; antitoxin YefM
K03734	Akenti_specific	Seawater_specific	Akenti_specific	62	20	40	79	6.1225	5.43527e-09	2.34295e-07	22	apbE; FAD:protein FMN transferase [EC:2.7.1.180]
K02396	Akenti_specific	Seawater_specific	Akenti_specific	36	46	10	109	8.53043	5.10654e-09	2.21697e-07	26	flgK; flagellar hook-associated protein 1 FlgK
K07713	Akenti_specific	Seawater_specific	Akenti_specific	31	51	6	113	11.4477	4.2656e-09	1.8652e-07	25	zraR, hydG; two-component system, NtrC family, response regulator HydG
K07289	Akenti_specific	Seawater_specific	Akenti_specific	28	54	4	115	14.9074	4.05598e-09	1.7864e-07	24	asmA; AsmA protein
K05952	Akenti_specific	Seawater_specific	Akenti_specific	28	54	4	115	14.9074	4.05598e-09	1.7864e-07	24	K05952; uncharacterized protein
K07043	Akenti_specific	Seawater_specific	Akenti_specific	48	34	21	98	6.58824	4.05061e-09	1.7864e-07	27	K07043; uncharacterized protein
K02302	Akenti_specific	Seawater_specific	Akenti_specific	33	49	7	112	10.7755	3.41221e-09	1.55999e-07	26	cysG; uroporphyrin-III C-methyltransferase / precorrin-2 dehydrogenase / sirohydrochlorin ferrochelatase [EC:2.1.1.107 1.3.1.76 4.99.1.4]
K07473	Akenti_specific	Seawater_specific	Akenti_specific	20	62	0	119	inf	3.46494e-09	1.55999e-07	20	dinJ; DNA-damage-inducible protein J
K09940	Akenti_specific	Seawater_specific	Akenti_specific	20	62	0	119	inf	3.46494e-09	1.55999e-07	20	K09940; uncharacterized protein
K07275	Akenti_specific	Seawater_specific	Akenti_specific	20	62	0	119	inf	3.46494e-09	1.55999e-07	20	ompW; outer membrane protein
K17292	Akenti_specific	Seawater_specific	Akenti_specific	20	62	0	119	inf	3.46494e-09	1.55999e-07	20	TBCA; tubulin-specific chaperone A
K07343	Akenti_specific	Seawater_specific	Akenti_specific	20	62	0	119	inf	3.46494e-09	1.55999e-07	20	tfoX; DNA transformation protein and related proteins
K03325	Akenti_specific	Seawater_specific	Akenti_specific	34	48	8	111	9.82812	3.26168e-09	1.53678e-07	26	ACR3, arsB; arsenite transporter
K03614	Akenti_specific	Seawater_specific	Akenti_specific	34	48	8	111	9.82812	3.26168e-09	1.53678e-07	26	rnfD; Na+-translocating ferredoxin:NAD+ oxidoreductase subunit D [EC:7.2.1.2]
K07334	Akenti_specific	Seawater_specific	Akenti_specific	25	57	2	117	25.6579	2.43194e-09	1.16388e-07	23	higB-1; toxin HigB-1
K02656	Akenti_specific	Seawater_specific	Akenti_specific	25	57	2	117	25.6579	2.43194e-09	1.16388e-07	23	pilF; type IV pilus assembly protein PilF
K00407	Akenti_specific	Seawater_specific	Akenti_specific	23	59	1	118	46	2.20792e-09	1.07358e-07	22	ccoQ; cytochrome c oxidase cbb3-type subunit IV
K09141	Akenti_specific	Seawater_specific	Akenti_specific	23	59	1	118	46	2.20792e-09	1.07358e-07	22	K09141; uncharacterized protein
K18300	Akenti_specific	Seawater_specific	Akenti_specific	23	59	1	118	46	2.20792e-09	1.07358e-07	22	oprN; outer membrane protein, multidrug efflux system
K13634	Akenti_specific	Seawater_specific	Akenti_specific	27	55	3	116	18.9818	2.05678e-09	1.02468e-07	24	cysB; LysR family transcriptional regulator, cys regulon transcriptional activator
[truncated: 2,102 more rows]
