# Supplementary material for: The microbiome of the branching coral Acropora kenti
Source: Research Square preprint supplement (doi:10.21203/rs.3.rs-3228011/v1), 2023-08-08
Supplement: Supplementary file 3 [file 67b9f5761c05fc4b4bde1709.xlsx]

## Sheet: TableS3.1
ConsensusLineage	Dunk_MAG1	Dunk_MAG10	Dunk_MAG12	Dunk_MAG2	Dunk_MAG4	Dunk_MAG6	Fitzroy_MAG10	Fitzroy_MAG11	Fitzroy_MAG12	Fitzroy_MAG13	Fitzroy_MAG14	Fitzroy_MAG15	Fitzroy_MAG17	Fitzroy_MAG19	Fitzroy_MAG2	Fitzroy_MAG20	Fitzroy_MAG23	Fitzroy_MAG24	Fitzroy_MAG27	Fitzroy_MAG3	Fitzroy_MAG4	Fitzroy_MAG5	Fitzroy_MAG7	Fitzroy_MAG8	Magnetic_MAG1	Magnetic_MAG10	Magnetic_MAG11	Magnetic_MAG13	Magnetic_MAG15	Magnetic_MAG16	Magnetic_MAG17	Magnetic_MAG20	Magnetic_MAG21	Magnetic_MAG22	Magnetic_MAG23	Magnetic_MAG29	Magnetic_MAG3	Magnetic_MAG4	Magnetic_MAG5	Magnetic_MAG7	Pandora_MAG11	Pandora_MAG12	Pandora_MAG13	Pandora_MAG14	Pandora_MAG15	Pandora_MAG16	Pandora_MAG17	Pandora_MAG18	Pandora_MAG19
Root; AMBIGUOUS_sister_group_plus_FUNCTIONAL_dddL_supergroup	0	0	0	0	0	0	0	0	0	0	0	0	0	0	0	0	0	0	0	0	0	0	0	0	0	0	0	0	0	0	0	0	0	0	0	0	0	0	0	0	0	0	0	0	0	0	0	0	0
Root; AMBIGUOUS_sister_group_plus_FUNCTIONAL_dddL_supergroup; FUNCTIONAL_dddL_group	0	0	0	0	0	0	0	0	0	0	0	0	0	0	0	0	0	0	0	0	0	0	0	0	0	0	0	0	0	0	0	0	0	0	0	0	0	0	0	0	0	0	0	0	0	0	0	0	0
Root; FUNCTIONAL_dddD_group	0	0	0	0	2	0	0	0	0	0	0	0	2	0	0	0	0	0	0	0	0	0	1	0	0	1	0	0	0	0	0	0	1	2	0	0	0	0	0	0	1	0	0	0	0	2	0	0	0
Root; FUNCTIONAL_dmdA_group	0	1	0	1	0	0	0	0	0	0	0	0	0	0	0	0	0	1	0	0	0	0	0	0	0	0	1	0	1	0	0	0	0	0	0	0	0	0	0	0	0	0	0	0	0	0	0	0	0
Root; PARALOG_group_annotated_as_ChrR_cupin_like_domain_protein	0	1	0	0	1	0	0	0	0	0	0	0	1	0	0	0	0	0	0	0	0	0	1	0	0	0	0	0	1	0	0	0	0	1	0	0	0	0	0	0	1	0	0	0	0	1	1	0	0
Root; PARALOG_group_annotated_as_putative_peptidases	3	2	2	2	1	2	6	2	4	1	3	2	2	2	3	3	2	2	2	6	6	6	2	2	2	2	2	6	4	2	2	3	1	2	2	3	2	2	1	2	2	5	2	2	2	2	3	2	1
Root; PARALOG_group1_annoated_as_alginate_biosynth_protein_and_cache_domain_protein	2	1	2	1	1	2	1	0	1	1	2	1	3	1	1	0	0	1	1	3	5	0	2	1	1	1	1	4	2	0	0	0	0	3	1	2	1	0	0	2	3	4	2	0	2	3	0	3	1
Root; PARALOG_group1_annotated_as_Acetyl_CoA_oxalate_CoA_transferase	6	7	0	7	0	0	1	0	0	0	6	0	2	0	0	1	0	0	0	1	0	0	0	0	1	0	1	0	0	0	0	1	0	2	0	6	0	0	0	0	0	1	0	0	0	2	0	0	0
Root; PARALOG_group1_annotated_as_aminomethyltransferases	1	6	1	7	1	2	1	0	3	1	1	1	0	2	1	1	0	1	1	12	7	2	1	1	1	2	1	8	2	1	0	1	1	0	1	1	1	1	2	1	1	3	2	2	1	6	5	1	0
Root; PARALOG_group1_annotated_as_dddP_and_putative_peptidase	0	0	0	0	0	0	0	0	0	0	0	0	0	0	0	0	0	0	0	0	0	0	0	0	0	0	0	0	0	0	0	0	0	0	0	0	0	0	0	0	0	0	0	0	0	2	0	0	0
Root; PARALOG_group2_annotated_as_dddD	0	0	0	0	0	0	0	0	0	0	0	0	0	0	0	0	0	0	0	0	0	0	0	0	0	0	0	0	1	0	0	0	0	0	0	0	0	0	0	0	0	0	0	0	0	0	0	0	0
Root; PARALOG_group2_annotated_as_dddW	0	0	0	0	0	0	0	0	0	0	0	0	0	0	0	0	0	0	0	0	0	0	0	0	0	0	0	0	0	1	0	0	0	0	0	0	0	0	0	0	0	0	0	0	0	0	1	0	0
Root; PARALOG_group2_annotated_as_dmdA	0	0	0	0	0	0	0	0	0	0	0	0	0	0	0	0	0	0	0	0	0	0	0	0	0	0	0	0	0	0	0	0	0	0	0	0	0	0	0	0	0	0	0	0	0	0	0	0	0
Root; PARALOG_group3_annotated_as_5_nitrosalicyclic_acid_1_2_dioxygenase	0	0	0	0	0	0	0	0	0	0	0	0	0	0	0	0	0	0	0	0	0	0	0	0	0	0	0	0	0	0	0	0	0	0	0	0	0	0	0	0	0	0	0	0	0	0	0	0	0
Root; PARALOG_group3_annotated_as_dddD	0	0	0	0	0	0	0	0	0	0	0	0	0	0	0	0	0	0	0	0	0	0	0	0	0	0	0	0	0	0	0	0	0	0	0	0	0	0	0	0	0	0	0	0	0	0	0	0	0
Root; PARALOG_group3_annotated_as_dmdA	0	1	0	1	0	0	0	0	0	0	0	0	0	0	0	0	0	0	0	0	0	0	0	0	0	0	0	0	0	0	0	0	0	0	0	0	0	0	0	0	0	0	0	0	0	0	0	0	0
Root; PARALOG_group4_annotated_as_dddD	0	0	0	0	0	0	0	0	0	0	0	0	0	0	0	0	0	0	0	0	0	0	0	0	0	0	0	0	0	0	0	0	0	0	0	0	0	0	0	0	0	0	0	0	0	0	0	0	0
Root; PARALOG_group4_annotated_as_hypothetical_protein	0	0	0	0	0	0	0	0	0	0	0	0	0	0	0	0	0	0	0	3	0	0	0	0	0	0	0	0	0	0	0	0	0	0	0	0	0	1	1	0	0	0	0	0	0	0	1	0	0
Root; PARALOG_group5_annotated_as_dmdA	0	1	0	1	0	0	0	0	0	0	0	0	0	0	0	0	0	0	0	0	0	0	0	0	0	0	0	0	0	0	0	0	0	0	0	0	0	0	0	0	0	0	0	0	0	0	1	0	0
Root; PARALOG_group5_annotated_as_HTH_transcriptional_activator_and_transcriptional_activator_NphR	0	0	0	0	0	0	3	0	1	0	0	0	0	0	0	1	0	0	0	2	1	0	0	0	0	0	0	1	0	0	0	1	0	0	0	0	0	1	0	1	0	1	0	0	0	2	0	0	0
Root; PARALOG_group6_annotated_as_dmdA	0	0	0	0	0	0	0	0	0	0	0	0	0	0	0	0	0	0	0	0	0	0	0	0	0	1	0	0	0	0	0	0	0	0	0	0	0	0	0	0	0	0	0	0	0	0	0	0	0
Root; PARALOG_group7_annotated_as_dmdA	0	0	0	0	0	0	0	0	0	0	0	0	0	0	0	0	0	0	0	0	0	0	0	0	0	0	0	0	0	0	0	0	0	0	0	0	0	0	0	0	0	0	0	0	0	0	1	0	0
Root; putativeFUNCTIONAL_and_FUNCTIONAL_dddW_contains_FUNCTIONAL_seqs_and_sister_groups	1	0	0	0	0	0	0	0	0	0	1	0	0	0	0	0	0	0	0	0	0	0	0	0	0	0	0	0	1	0	0	0	0	0	0	1	0	0	0	0	0	0	0	0	0	0	0	1	0
Root; putativeFUNCTIONAL_dddP_group_includes_FUNCTIONAL_seqs_and_sister_groups	0	0	0	0	0	0	0	0	0	0	0	0	0	0	0	0	0	0	0	0	0	0	0	0	0	0	0	0	0	0	0	0	0	0	0	0	0	0	0	0	0	0	0	0	0	0	0	1	0
Root; putativeFUNCTIONAL_dddP_group_includes_FUNCTIONAL_seqs_and_sister_groups; putativeFUNCTIONAL_dddP_group_clades_boardered_by_FUNCTIONAL_seqs	0	0	0	0	0	0	0	0	0	0	0	0	0	0	0	0	0	0	0	0	0	0	0	0	0	0	0	1	0	0	0	0	0	0	0	0	0	0	0	0	0	0	0	0	0	0	0	0	0
Root; putativeFUNCTIONAL_dddP_group_includes_FUNCTIONAL_seqs_and_sister_groups; putativeFUNCTIONAL_dddP_group_clades_boardered_by_FUNCTIONAL_seqs; FUNCTIONAL_dddP_group1_alphaproteobacteria	0	0	0	0	0	0	0	0	0	0	0	0	0	0	0	0	0	0	0	0	0	0	0	0	0	0	0	0	0	0	0	0	0	0	0	0	0	0	0	0	0	0	0	0	0	0	0	0	0
Root; putativeFUNCTIONAL_dddP_group_includes_FUNCTIONAL_seqs_and_sister_groups; putativeFUNCTIONAL_dddP_group_clades_boardered_by_FUNCTIONAL_seqs; FUNCTIONAL_dddP_group3	0	0	0	0	0	0	0	0	0	0	0	0	0	0	0	0	0	0	0	0	0	0	0	0	0	0	0	0	0	0	0	0	0	0	0	0	0	0	0	0	0	0	0	0	0	0	0	0	0
Classification	d__Bacteria;p__Proteobacteria;c__Gammaproteobacteria;o__Pseudomonadales;f__Alcanivoracaceae;g__Alcanivorax;s__	d__Bacteria;p__Proteobacteria;c__Gammaproteobacteria;o__Pseudomonadales;f__Halieaceae;g__Luminiphilus;s__Luminiphilus sp012270045	d__Bacteria;p__Cyanobacteria;c__Cyanobacteriia;o__PCC-6307;f__Cyanobiaceae;g__Synechococcus_E;s__Synechococcus_E sp002724845	d__Bacteria;p__Proteobacteria;c__Gammaproteobacteria;o__Pseudomonadales;f__Halieaceae;g__Luminiphilus;s__Luminiphilus sp012270045	d__Bacteria;p__Proteobacteria;c__Gammaproteobacteria;o__Pseudomonadales;f__Endozoicomonadaceae;g__Endozoicomonas;s__	d__Bacteria;p__Cyanobacteria;c__Cyanobacteriia;o__PCC-6307;f__Cyanobiaceae;g__Synechococcus_C;s__	d__Bacteria;p__Firmicutes_A;c__Clostridia;o__Peptostreptococcales;f__Acidaminobacteraceae;g__JABXKX01;s__	d__Bacteria;p__Firmicutes;c__Bacilli;o__Mycoplasmatales;f__Mycoplasmataceae;g__;s__	d__Bacteria;p__Desulfobacterota;c__Desulfovibrionia;o__Desulfovibrionales;f__Desulfovibrionaceae;g__;s__	d__Bacteria;p__Proteobacteria;c__Alphaproteobacteria;o__;f__;g__;s__	d__Bacteria;p__Proteobacteria;c__Gammaproteobacteria;o__Pseudomonadales;f__Alcanivoracaceae;g__Alcanivorax;s__	d__Bacteria;p__Bacteroidota;c__Bacteroidia;o__Flavobacteriales;f__Flavobacteriaceae;g__DT-33;s__	d__Bacteria;p__Proteobacteria;c__Gammaproteobacteria;o__Pseudomonadales;f__Endozoicomonadaceae;g__Endozoicomonas;s__	d__Bacteria;p__Cyanobacteria;c__Cyanobacteriia;o__PCC-6307;f__Cyanobiaceae;g__Synechococcus_E;s__Synechococcus_E sp002724845	d__Bacteria;p__Desulfobacterota;c__Desulfovibrionia;o__Desulfovibrionales;f__Desulfovibrionaceae;g__Pseudodesulfovibrio;s__	d__Bacteria;p__Actinobacteriota;c__Actinomycetia;o__Propionibacteriales;f__Propionibacteriaceae;g__Cutibacterium;s__Cutibacterium acnes	d__Bacteria;p__Chlamydiota;c__Chlamydiia;o__Chlamydiales;f__Simkaniaceae;g__Simkania;s__	d__Bacteria;p__Proteobacteria;c__Alphaproteobacteria;o__JABSOH01;f__;g__;s__	d__Bacteria;p__Cyanobacteria;c__Cyanobacteriia;o__PCC-6307;f__Cyanobiaceae;g__Synechococcus_E;s__Synechococcus_E sp002724845	d__Bacteria;p__Desulfobacterota;c__Desulfobacteria;o__Desulfobacterales;f__Desulfobacteraceae;g__Desulfobacter;s__	d__Bacteria;p__Desulfobacterota;c__Desulfobacteria;o__Desulfobacterales;f__Desulfobacteraceae;g__Desulfobacter;s__	d__Bacteria;p__Bacteroidota;c__Ignavibacteria;o__Ignavibacteriales;f__Melioribacteraceae;g__;s__	d__Bacteria;p__Proteobacteria;c__Gammaproteobacteria;o__Pseudomonadales;f__Endozoicomonadaceae;g__Endozoicomonas;s__	d__Bacteria;p__Cyanobacteria;c__Cyanobacteriia;o__PCC-6307;f__Cyanobiaceae;g__Synechococcus_E;s__Synechococcus_E sp002724845	d__Bacteria;p__Proteobacteria;c__Gammaproteobacteria;o__LLD-282;f__LLD-282;g__;s__	d__Bacteria;p__Proteobacteria;c__Gammaproteobacteria;o__QNFE01;f__QNFE01;g__;s__	d__Bacteria;p__Proteobacteria;c__Alphaproteobacteria;o__JABSOH01;f__;g__;s__	d__Bacteria;p__Desulfobacterota;c__Desulfobacteria;o__Desulfobacterales;f__Desulfobacteraceae;g__Desulfobacter;s__	d__Bacteria;p__Proteobacteria;c__Gammaproteobacteria;o__QNFE01;f__QNFE01;g__;s__	d__Bacteria;p__Bacteroidota;c__Bacteroidia;o__Flavobacteriales;f__Flavobacteriaceae;g__;s__	d__Bacteria;p__Firmicutes;c__Bacilli;o__Mycoplasmatales;f__Mycoplasmataceae;g__;s__	d__Bacteria;p__Actinobacteriota;c__Actinomycetia;o__Propionibacteriales;f__Propionibacteriaceae;g__Cutibacterium;s__Cutibacterium acnes	d__Bacteria;p__Proteobacteria;c__Alphaproteobacteria;o__UBA8366;f__GCA-2696645;g__;s__	d__Bacteria;p__Proteobacteria;c__Gammaproteobacteria;o__Pseudomonadales;f__Endozoicomonadaceae;g__Endozoicomonas;s__	d__Bacteria;p__Cyanobacteria;c__Cyanobacteriia;o__PCC-6307;f__Cyanobiaceae;g__Synechococcus_E;s__Synechococcus_E sp002724845	d__Bacteria;p__Proteobacteria;c__Gammaproteobacteria;o__Pseudomonadales;f__Alcanivoracaceae;g__Alcanivorax;s__	d__Bacteria;p__Bacteroidota;c__Bacteroidia;o__Flavobacteriales;f__Flavobacteriaceae;g__DT-33;s__	d__Bacteria;p__Verrucomicrobiota;c__Verrucomicrobiae;o__Verrucomicrobiales;f__Akkermansiaceae;g__Rubritalea;s__	d__Bacteria;p__Nitrospirota;c__Nitrospiria;o__Nitrospirales;f__UBA8639;g__Bin75;s__	d__Bacteria;p__Bacteroidota;c__Bacteroidia;o__Flavobacteriales;f__Flavobacteriaceae;g__Flaviramulus_A;s__	d__Bacteria;p__Proteobacteria;c__Gammaproteobacteria;o__Pseudomonadales;f__Endozoicomonadaceae;g__Endozoicomonas;s__	d__Bacteria;p__Desulfobacterota;c__Desulfobulbia;o__Desulfobulbales;f__Desulfocapsaceae;g__Desulforhopalus;s__	d__Bacteria;p__Cyanobacteria;c__Cyanobacteriia;o__PCC-6307;f__Cyanobiaceae;g__Synechococcus_C;s__	d__Bacteria;p__Desulfobacterota_D;c__UBA1144;o__UBA2774;f__UBA2774;g__CR02bin9;s__	d__Bacteria;p__Planctomycetota;c__Planctomycetes;o__Pirellulales;f__UBA1268;g__UBA1268;s__UBA1268 sp002694955	d__Bacteria;p__Proteobacteria;c__Alphaproteobacteria;o__Rhizobiales;f__JACESI01;g__JACESI01;s__	d__Bacteria;p__Proteobacteria;c__Alphaproteobacteria;o__Rhizobiales;f__Methyloligellaceae;g__Methyloceanibacter;s__	d__Bacteria;p__Proteobacteria;c__Gammaproteobacteria;o__Chromatiales;f__Sedimenticolaceae;g__;s__	d__Archaea;p__Thermoproteota;c__Nitrososphaeria;o__Nitrososphaerales;f__Nitrosopumilaceae;g__JACEMX01;s__
Specificity	A.kenti_specific	A.kenti_specific	seawater_specific	seawater_specific	A.kenti_specific	seawater_specific	A.kenti_specific	A.kenti_specific	A.kenti_specific	A.kenti_specific	A.kenti_specific	A.kenti_specific	A.kenti_specific	seawater_specific	A.kenti_specific	A.kenti_specific	A.kenti_specific	A.kenti_specific	seawater_specific	A.kenti_specific	A.kenti_specific	A.kenti_specific	A.kenti_specific	seawater_specific	A.kenti_specific	A.kenti_specific	A.kenti_specific	A.kenti_specific	A.kenti_specific	A.kenti_specific	A.kenti_specific	A.kenti_specific	A.kenti_specific	A.kenti_specific	seawater_specific	A.kenti_specific	A.kenti_specific	A.kenti_specific	A.kenti_specific	A.kenti_specific	A.kenti_specific	A.kenti_specific	seawater_specific	A.kenti_specific	seawater_specific	A.kenti_specific	A.kenti_specific	A.kenti_specific	A.kenti_specific
[truncated: 152 more columns]
