# Supplementary material for: The microbiome of the branching coral Acropora kenti
Source: Research Square preprint supplement (doi:10.21203/rs.3.rs-3228011/v1), 2023-08-08
Supplement: Supplementary file 4 [file 95650203579d700eaf752d12.docx]

Supplementary Information for:

The microbiome of the branching coral *Acropora kenti*

Lauren F. Messer1,2*, David G. Bourne3,4, Steven J. Robbins5, Megan Clay1, Sara C. Bell3,4, Simon J. McIlroy1, Gene W. Tyson1*

1 Centre for Microbiome Research, School of Biomedical Sciences, Translational Research Institute, Queensland University of Technology, Brisbane, QLD, 4000, Australia

2 Division of Biological and Environmental Sciences, Faculty of Natural Sciences, University of Stirling, Stirling, FK9 4LA, Scotland

3 College of Science and Engineering, James Cook University, Townsville, QLD, 4810, Australia

4 Australian Institute of Marine Science, Townsville, QLD, 4810, Australia

5 Australian Centre for Ecogenomics, School of Chemistry and Molecular Biosciences, The University of Queensland, Brisbane, QLD, 4072, Australia

*Corresponding authors: Dr Lauren Messer; Email: lauren.messer@stir.ac.uk; Phone: +44 1786 467810; Professor Gene Tyson; Email: gene.tyson@qut.edu.au; Phone: +61 7 3443 7284

# Supplementary Methods

## Experimental design and sample collection

The environmental conditions at each site were determined according to the GBR Marine Monitoring Program using standard protocols to determine temperature, salinity, and concentrations of particulate organic carbon (POC), particulate phosphorus (PP), dissolved inorganic phosphorus (DIP), total dissolved phosphorus (TDP), particulate nitrogen (PN), dissolved inorganic nitrogen (NO3-, NO2-, NH4+), total dissolved nitrogen (TDN), silica (Si), and chlorophyll α (Chl-α) 1.

## Nucleic acid extraction, and metagenomic sequencing

Immediately prior to DNA extraction using the MoBio Ultra Clean Microbial DNA Isolation kit, microbial pellets were thawed on ice and filtered through a 5 μm Isopore membrane filter (Millipore) to remove residual Symbiodiniaceae. DNA was purified using the Zymo Genomic DNA Clean and Concentrator kit and quantified using the Qubit High Sensitivity dsDNA kit (Invitrogen) prior to library preparation. Metagenomic libraries (2 × 150 bp) were prepared with the Illumina Nextera XT library preparation kit following the manufacturer's protocol, or using a low-input protocol 2 depending on the DNA concentration, which included 12 or 20 cycles of PCR respectively. Libraries were visualised on the TapeStation using a Genomic DNA Tape, and only those with a discernible peak of the expected size and quantifiable DNA concentration were selected for sequencing (n=22/24 *A. kenti* samples, 6/6 seawater samples and 1/2 negative control samples from DNA extraction and library preparation). All *A. kenti* samples underwent shallow sequencing (~2 Gbp) on the Illumina HiSeq2500 platform (Ramaciotti Centre for Genomics, University of New South Wales). After basic inspection of data quality, all samples were sequenced to a greater depth (~20 Gbp; including the seawater samples) and one *A. kenti* sample from each sampling location underwent deep sequencing (~80-100 Gbp per sample). As samples were sequenced multiple times from the same starting library, reads were concatenated prior to downstream analysis.

## Quality control, coral host and Symbiodiniaceae contamination removal

To improve metagenomic assembly and the binning of microbial reads into metagenome-assembled genomes from *A. kenti* samples, reads mapping to reference genomes of the coral host and Symbiodiniaceae symbionts, and those representing PCR duplicates, were removed prior to processing. Briefly, adaptors were removed using Seqpurge (ngs-bits/2018_11), and trimmed reads mapping to *A. kenti* 3, *Cladocopium C15* 4, and *Cladocopium goreaui* 5, using CoverM (v0.2.0-alpha7; https://github.com/wwood/CoverM) with the flags --min-read-aligned-percent 0.75, --min-read-percent-identity 0.95 and --inverse used to retain all reads not meeting these criteria (i.e. those that are likely derived from the microbiome). The host and Symbiodiniaceae removed reads were assembled using megahit (v1.1.4) 6 with the flag --min-contig-len 250 and read mapping alignments (BAM files) were generated using CoverM (v0.2.0-alpha7). The samtools Markdup workflow (http://www.htslib.org/doc/samtools-markdup.html) was followed to identify and remove PCR duplicates from the sorted BAM files after the removal of supplementary alignments (samtools flag -F2304; 7). Finally, PCR duplicate-free BAM files were re-sorted using samtools sort -n and converted to fastq files using samtools fastq, then compressed using GNU gzip. GNU parallel was used throughout all analyses to speed up processing 8. Metagenomic sequencing of microbiome enriched *A. kenti* holobiont samples from six reef sites (n = 22) resulted in a total of 621 Gb data. Between 56-90% of *A. kenti* metagenomic reads were removed through the QC process, giving rise to 118 Gb of sequence data for binning (Supplementary Figure 1).

**Evaluation of the negative control sample**

Biological samples with high levels of host genome contamination and low microbial biomass can display decreased sensitivity in detecting rare microbial species 9, and consequently can be prone to the effects of contamination 10. Sequencing of a DNA extraction and library preparation negative control enabled comparison between biological samples and contaminants. The 16S rRNA gene-based taxonomic profiles of the metagenomes were determined using GraftM11 with the SILVA database, and for single copy ribosomal proteins using SingleM (https://github.com/wwood/singlem), based on the Genome Taxonomy Database (GTDB)12. This analysis revealed discrete profiles between the samples and negative control, with ~83% of sequences in the negative control from the Enterobacteriaceae family, including the specific genera *Enterobacter* sp. (7.6%), *Escherichia* sp. (5.7%), *Klebsiella* sp. (12.4%), *Serratia* sp. (2.5%). In contrast, Enterobacteriaceae represented between 0.9-4.7% in the *A. kenti* samples, and 0.3-0.6% in the seawater samples, with mean relative abundances of 0.2% and 0.0% *Enterobacter* sp., 0.3% and 0.0% *Escherichia* sp., 0.0% and 0.1% *Klebsiella* sp., and 0.2% and 0.0% *Serratia* sp., in *A. kenti* and seawater samples respectively.

Reads from the control sample were mapped to the dereplicated MAGs using CoverM (v0.4.0) and the flags -m mean --min-read-percent-identity 0.5, --min-read-aligned-percent 0.5, representing lower stringency criteria than the *A. kenti* and seawater samples, to further confirm the validity of the MAGs. This demonstrated that 0% of reads from the control sample mapped to the MAGs, suggesting that none were introduced as contaminants during laboratory processing. However, three of the *A. kenti*-specific MAGs with normalised relative abundances between 0.03 - 5.5%, were classified as *Cutibacterium acnes* (Actinobacteriota; Fitzroy_MAG20, Russell_MAG30, and Magnetic_MAG20) by GTDB,a species which is a common contaminant in low microbial biomass 16S rRNA gene sequencing coral microbiome studies 13,14. These MAGs do not appear to have been introduced during the laboratory processing, DNA extraction, or sequencing, as they were not detected in the control sample, thus they have not been removed from downstream analyses. Nevertheless, through the holobiont metabolic reconstruction and functional gene enrichment analyses conducted herein, they were not identified as playing any specific or key roles in holobiont community function. Ultimately, any supposition of their role in the *A. kenti* holobiont must be viewed with caution without validation of their physical positioning within the coral host 15.

## Generation of the ‘overall’ dereplicated dataset and statistical analyses

The statistical tests carried out on the MAGs were driven by the following *a priori* hypotheses, i) the *A. kenti* microbiome would be taxonomically and functionally distinct to that of the surrounding seawater, ii) the composition of the *A. kenti* microbiome would demonstrate spatial heterogeneity due to latitudinal and/or local water quality gradients, and iii) *A. kenti* microbiome function would vary due to latitudinal and/or local water quality differences. It is assumed that individual colonies from each sampling location represent individual biological replicates. Read mapping to closely related microbial strains can introduce cross-mapping of reads when calculating coverage and relative abundance, and therefore perform statistical analyses to test the specific hypotheses. Thus, an ‘overall’ dereplication step was performed on the 201 MAGs using dRep with default settings, resulting in 64 *A. kenti*-specific and 49 seawater-specific MAGs for biogeography analyses.

# Supplementary Results and Discussion

## Supplementary Note 1: Recovery of seawater MAGs

In total, 182 MAGs with quality scores ≥ 50 were recovered from the adjacent seawater samples (n = 6), resulting in 99 MAGs (86.7 ± 7.25 % mean completeness, and 2.89 ± 2.31 % mean contamination) after dereplication and quality filtering. These dereplicated MAGs were representative of >30% of the genus-level representatives within the seawater microbiomes and spanned 7 bacterial and 1 archaeal phyla, including, Actinobacteriota (n = 18), Bacteroidota (n = 23), Cyanobacteria (n = 11), Marinisomatota (n = 6), Planctomycetota (n = 2), Proteobacteria (n = 27), SAR324 (n = 3), and Thermoplasmatota (n = 9), respectively (Figure 1). In contrast to the *A. kenti* samples, MAGs from the Cyanobacteria comprised the most abundant lineages across the seawater samples. However, dominant seawater-associated lineages, such as the Pelagibacteraceae, were not represented within the recovered MAGs, in-line with previous genome-resolved metagenomic studies that have included coral reef seawater 4,16,17. This is perhaps owing to the genomic complexity 18 and high alpha-diversity of microbial communities within seawater samples 19 which often precludes their assembly into contiguous sequences for binning.

## Supplementary Note 2: *A. kenti* and seawater MAG specificity

Further investigation of the prevalence and relative abundance of MAGs across the datasetsuggested that not all the *A. kenti*-derived MAGs were specific to the coral holobiont. In total, 20 of the *A. kenti*-derived MAGs were either prevalent (i.e. present in ≥ 50% of samples) within the seawater, displayed relative abundances in seawater ≥ 0.1 %, and/or had a mean relative abundance ratio (*A. kenti*:seawater) of < 1. These 20 *A. kenti*-derived MAGs included representatives from the phyla Cyanobacteria (16 MAGs from *Synechococcus_E* sp002724845, *Synechococcus C* sp*.*, and *RCC307* sp012270465), Proteobacteria (2 MAGs; *Luminiphilus* sp012270045 and *UBA8309* sp001627655), Planctomycetota (1 MAG; *UBA1268* sp002694955), and Bacteroidota (1 MAG; *UBA10066* sp003448535). Their recovery from *A. kenti* metagenomes at between 0.02 - 14.6% normalised relative abundances may indicate transient symbiotic relationships with the host, for example within coral mucus 20, or ingestion of these species by the host during times of heterotrophic feeding 21,22. Due to their consistent prevalence, and higher relative abundances within the seawater samples, these MAGs may in fact represent carry-over of microorganisms from the surrounding seawater during sampling. As one of the goals of the present study was to specifically determine functional roles of *A. kenti* microbial symbionts, the 20 *A. kenti* MAGs that were prevalent in seawater are considered within the seawater-specific dataset. While the remaining 82 *A. kenti*-derived MAGs were considered specific to the *A. kenti* holobiont.

## Supplementary Note 3: Molecular mechanisms indicative of a host-associated lifestyle within *A. kenti*-specific MAGs

Investigation of the specific genomic features of individual lineages hinted at their putative niches within the *A. kenti* holobiont. For example, the *A. kenti* MAGs with the smallest predicted genome sizes of 0.68 - 0.89 Mbp, and lowest numbers of predicted genes at 588 - 820, belonged to the intracellular Firmicutes family Mycoplasmataceae (3 MAGs with quality scores between 87 - 92%; Fitzroy_MAG11, Magnetic_MAG17, and Russell_MAG37). This lineage has previously been visualised within the tissues of cold-water corals 23, but they are uncommon within tropical scleractinian coral microbiome taxonomic surveys 13. Their presence across three different reef sites at maximum relative abundances of 9.1% suggests they may also occur as important intracellular symbionts within *A. kenti*, but *in situ* visualisation necessary to confirm this hypothesis. In contrast, MAGs from the widely distributed invertebrate-associated genus *Endozoicomonas* sp. (9 MAGs with quality scores between 86 - 95%; Fitzroy_MAG7, Fitzroy_MAG17, Russell_MAG1, Russell_MAG12, Dunk_MAG4, Pelorus_MAG18, Pandora_MAG11, Pandora_MAG22, Magnetic_MAG22) displayed larger genome sizes of 3.75 - 5.84 Mbp and encoded between 3483 - 4549 predicted genes, perhaps reflecting the host-specific, yet flexible niche of Endozoicomonadaceae within coral mucus and tissues 24, and a necessary extensive metabolic repertoire. These MAGs were prevalent across the six reef sites with maximum relative abundances of between 8.5 - 23%, supporting the notion that they are key symbionts within the *A. kenti* holobiont 25.

## Supplementary Note 4: Nitrogen metabolism within the *A. kenti* microbiome

Many of the lineages identified as playing a role in holobiont nitrogen cycling displayed patchy distributions across the *A. kenti* samples, questioning their overall importance. However, some are putative facultative anaerobes suggesting their positioning is not within *A. kenti* tissues but rather they may reside within the coral skeleton 26. The skeletal microbiome was not targeted in our microbial enrichment protocol, and thus they may be underrepresented in our dataset, though some carry-over may have occurred due to the harsh nature of the air-blasting. As an example, several *A. kenti*-specific MAGs encoding nitrogen fixation, including novel genera within the families Desulfovibrionaceae (Fitzroy_MAG12), Sedimenticolaceae (Pandora_MAG18), and Methyloligellaceae (Pelorus_MAG5), and the genus *Desulforhopalus* (Pandora_MAG12), were only present in the sample they were derived from at between 1.2 - 2.7% relative abundance. While 1 MAG of the well-known coral-associated species, *Chlorobium_A marina* (Russell_MAG40), was present in four samples, three of these were from Russell Island. Moreover, although 1 MAG from the genus *Desulfobacter* *sp.* (Magnetic_MAG13) was detected in five samples, relative abundances outside of the sample it was derived from were < 0.5%. These results contrast with previous surveys of coral-associated diazotrophs, in which Alphaproteobacteria typically dominate and appear to be widespread symbionts 27–30. Rather, herein *Nitratireductor aquibiodomus* (Pandora_MAG31), displayed prevalence across the *A. kenti* samples. In previous research, *Nitratireductor aquibiodomus* has been associated with coral Black Band Disease 31, but here it was present in 60% of samples at relative abundances between 0.1-7.4%, suggesting it may play a key role in nitrogen cycling in healthy *A. kenti* colonies.

## Supplementary Note 5: Genomic evidence of autotrophic carbon fixation in *A. kenti* MAGs

The reverse tricarboxylic acid cycle (rTCA) was encoded by 13 MAGs of five phyla, but the key enzyme ATP citrate lyase was only identified in two: *Chlorobium_A marina* (Russell_MAG40)and Nitrospirota *Bin75* sp. (Magnetic_MAG5). The modified hydroxypropionate-hydroxybutyrate cycle of *Nitrosopumilus maritimus* 32, was encoded by the archaeal *JACEMX01 sp.* (Pandora_MAG19). While genes of the Calvin-Benson-Bassham (CBB) cycle were encoded by 10 MAGs from the Proteobacteria (n = 9) and Bacteroidota (n = 1), including *Chlorobium_A marina* (Russell_MAG40) and *Nitratireductor aquibiodomus* (Pandora_MAG31). However, phylogenetic placement revealed that only two *A. kenti*-specific MAGs encoded the ribulose-bisphosphate carboxylase (RuBisCO) enzyme functional within the CBB cycle. Namely, *Chlorobium_A marina* (Russell_MAG40) and the Sedimenticolaceae MAG (Pandora_MAG18), which encodes two copies of the Form I RuBisCO subunit *rbcL* but has an incomplete CBB cycle (71% completeness).

**References**

1. Lønborg, C. *et al.* Marine Monitoring Program: Annual report for inshore water quality monitoring 2014-2015. (2016).

2. Rinke, C. *et al.* Validation of picogram- and femtogram-input DNA libraries for microscale metagenomics. *PeerJ* **4**, e2486 (2016).

3. Cooke, I. *et al.* Genomic signatures in the coral holobiont reveal host adaptations driven by Holocene climate change and reef specific symbionts. *Sci Adv* **6**, (2020).

4. Robbins, S. J. *et al.* A genomic view of the reef-building coral Porites lutea and its microbial symbionts. *Nat Microbiol* **4**, 2090–2100 (2019).

5. Chen, Y., González-Pech, R. A., Stephens, T. G., Bhattacharya, D. & Chan, C. X. Evidence That Inconsistent Gene Prediction Can Mislead Analysis of Dinoflagellate Genomes. *J. Phycol.* **56**, 6–10 (2020).

6. Li, D., Liu, C.-M., Luo, R., Sadakane, K. & Lam, T.-W. MEGAHIT: an ultra-fast single-node solution for large and complex metagenomics assembly via succinct de Bruijn graph. *Bioinformatics* **31**, 1674–1676 (2015).

7. Li, H. *et al.* The Sequence Alignment/Map format and SAMtools. *Bioinformatics* **25**, 2078–2079 (2009).

8. Tange, O. GNU Parallel: The Command-Line Power Tool.

9. Pereira-Marques, J. *et al.* Impact of Host DNA and Sequencing Depth on the Taxonomic Resolution of Whole Metagenome Sequencing for Microbiome Analysis. *Front. Microbiol.* **10**, 1277 (2019).

10. Eisenhofer, R. *et al.* Contamination in Low Microbial Biomass Microbiome Studies: Issues and Recommendations. *Trends Microbiol.* **27**, 105–117 (2019).

11. Boyd, J. A., Woodcroft, B. J. & Tyson, G. W. GraftM: a tool for scalable, phylogenetically informed classification of genes within metagenomes. *Nucleic Acids Res.* **46**, e59 (2018).

12. Parks, D. H. *et al.* A standardized bacterial taxonomy based on genome phylogeny substantially revises the tree of life. *Nat. Biotechnol.* **36**, 996–1004 (2018).

13. Huggett, M. J. & Apprill, A. Coral microbiome database: Integration of sequences reveals high diversity and relatedness of coral-associated microbes. *Environ. Microbiol. Rep.* **11**, 372–385 (2019).

14. Kellogg, C. A. Microbiomes of stony and soft deep-sea corals share rare core bacteria. *Microbiome* **7**, 90 (2019).

15. D Ainsworth, T. *et al.* The coral core microbiome identifies rare bacterial taxa as ubiquitous endosymbionts. *ISME J.* **9**, 2261–2274 (2015).

16. Glasl, B. *et al.* Comparative genome-centric analysis reveals seasonal variation in the function of coral reef microbiomes. *ISME J.* **14**, 1435–1450 (2020).

17. Robbins, S. J. *et al.* A genomic view of the microbiome of coral reef demosponges. *ISME J.* (2021) doi:10.1038/s41396-020-00876-9.

18. Delmont, T. O. *et al.* Single-amino acid variants reveal evolutionary processes that shape the biogeography of a global SAR11 subclade. *Elife* **8**, (2019).

19. Pachiadaki, M. G. *et al.* Charting the Complexity of the Marine Microbiome through Single-Cell Genomics. *Cell* **179**, 1623-1635.e11 (2019).

20. Marchioro, G. M. *et al.* Microbiome dynamics in the tissue and mucus of acroporid corals differ in relation to host and environmental parameters. *PeerJ* **8**, e9644 (2020).

21. Meunier, V. *et al.* Diazotroph-Derived Nitrogen Assimilation Strategies Differ by Scleractinian Coral Species. *Frontiers in Marine Science* **8**, 1018 (2021).

22. Tremblay, P., Naumann, M. S., Sikorski, S., Grover, R. & Ferrier-Pagès, C. Experimental assessment of organic carbon fluxes in the scleractinian coral Stylophora pistillata during a thermal and photo stress event. *Mar. Ecol. Prog. Ser.* **453**, 63–77 (2012).

23. Neulinger, S. C. *et al.* Tissue-associated “Candidatus Mycoplasma corallicola” and filamentous bacteria on the cold-water coral Lophelia pertusa (Scleractinia). *Appl. Environ. Microbiol.* **75**, 1437–1444 (2009).

24. Pollock, F. J. *et al.* Coral-associated bacteria demonstrate phylosymbiosis and cophylogeny. *Nat. Commun.* **9**, 4921 (2018).

25. Glasl, B., Smith, C. E., Bourne, D. G. & Webster, N. S. Disentangling the effect of host-genotype and environment on the microbiome of the coral Acropora tenuis. *PeerJ* **7**, e6377 (2019).

26. Pernice, M. *et al.* Down to the bone: the role of overlooked endolithic microbiomes in reef coral health. *ISME J.* **14**, 325–334 (2020).

27. Lema, K. A., Bourne, D. G. & Willis, B. L. Onset and establishment of diazotrophs and other bacterial associates in the early life history stages of the coral Acropora millepora. *Mol. Ecol.* **23**, 4682–4695 (2014).

28. Glaze, T. D., Erler, D. V. & Siljanen, H. M. P. Microbially facilitated nitrogen cycling in tropical corals. *ISME J.* (2021) doi:10.1038/s41396-021-01038-1.

29. Lesser, M. P., Morrow, K. M., Pankey, S. M. & Noonan, S. H. C. Diazotroph diversity and nitrogen fixation in the coral Stylophora pistillata from the Great Barrier Reef. *ISME J.* **12**, 813–824 (2018).

30. Liang, J. *et al.* Diazotroph Diversity Associated With Scleractinian Corals and Its Relationships With Environmental Variables in the South China Sea. *Front. Physiol.* **11**, 615 (2020).

31. Henao, J. *et al.* Genome sequencing of three bacteria associated to black band disease from a Colombian reef-building coral. *Genom Data* **11**, 73–74 (2017).

32. Könneke, M. *et al.* Isolation of an autotrophic ammonia-oxidizing marine archaeon. *Nature* **437**, 543–546 (2005).
