# Supplementary material for: The microbiome of the branching coral Acropora kenti
Source: Research Square preprint supplement (doi:10.21203/rs.3.rs-3228011/v1), 2023-08-08
Supplement: Supplementary file 5 [file afee908d60816ebe1d83c268.xlsx]

## Sheet: Sheet1
Annotation	Group_1	Group_2	Enriched_in	Group_1_mean	Group_2_mean	Score	P-value	Difference_group_means	KO annotation	Description	Function
cluster_66806	Coastal	South_Marine	Coastal	158.84	116.17	0	0.03	42.67	K03695	clpB; ATP-dependent Clp protease ATP-binding subunit ClpB	chaperone
cluster_6678	Coastal	South_Marine	Coastal	85.3	57.1	0	0.03	28.21	K03544	clpX, CLPX; ATP-dependent Clp protease ATP-binding subunit ClpX	chaperone
cluster_11927	Coastal	South_Marine	Coastal	86.52	60.05	0	0.03	26.47	K04077	groEL, HSPD1; chaperonin GroEL	chaperone
cluster_38493	Coastal	South_Marine	Coastal	83.24	60.55	0	0.03	22.69	K04078	groES, HSPE1; chaperonin GroES	chaperone
cluster_45348	Coastal	South_Marine	Coastal	13.39	0.2	0	0.03	13.2	K03687	GRPE; molecular chaperone GrpE	chaperone
cluster_38329	Coastal	South_Marine	Coastal	75.17	55.11	0	0.03	20.06	K04079	HSP90A, htpG; molecular chaperone HtpG	chaperone
cluster_62161	North_Marine	Coastal	Coastal	0.2	4.42	2	0.01	4.22	K05516	cbpA; curved DNA-binding protein	chaperone
cluster_83569	North_Marine	Coastal	North_Marine	3.66	0.06	2.5	0.01	3.6	K03687	GRPE; molecular chaperone GrpE	chaperone
cluster_55609	North_Marine	Coastal	Coastal	0.2	4.76	1	0	4.56	K11940	hspQ; heat shock protein HspQ	stress response
cluster_25406	North_Marine	Coastal	Coastal	0.97	18.48	1	0.01	17.51	K04080	ibpA; molecular chaperone IbpA	chaperone
cluster_84722	North_Plume	Coastal	Coastal	69.42	109.87	0	0.03	40.45	K04043	dnaK, HSPA9; molecular chaperone DnaK	chaperone
cluster_15280	North_Plume	Coastal	Coastal	3.2	23.04	0	0.03	19.84	K04082	hscB, HSCB, HSC20; molecular chaperone HscB	chaperone
cluster_54900	North_Plume	Coastal	Coastal	0.26	3.9	0	0.03	3.65	K02567	napA; nitrate reductase (cytochrome) [EC:1.9.6.1]	nitrogen cycling
cluster_5911	North_Plume	Coastal	Coastal	0.98	4.06	0	0.03	3.08	K00370	narG, narZ, nxrA; nitrate reductase / nitrite oxidoreductase, alpha subunit [EC:1.7.5.1 1.7.99.-]	nitrogen cycling
cluster_88533	North_Plume	Coastal	Coastal	0.98	4.39	0	0.03	3.42	K00371	narH, narY, nxrB; nitrate reductase / nitrite oxidoreductase, beta subunit [EC:1.7.5.1 1.7.99.-]	nitrogen cycling
cluster_1456	North_Plume	Coastal	Coastal	0.98	4.06	0	0.03	3.08	K00374	narI, narV; nitrate reductase gamma subunit [EC:1.7.5.1 1.7.99.-]	nitrogen cycling
cluster_19042	North_Plume	Coastal	Coastal	0.15	34.29	0	0.03	34.14	K10343	SPSB1_4, SSB1, SSB4; SPRY domain-containing SOCS box protein 1/4	signal transduction
cluster_58795	North_Plume	Coastal	Coastal	1.73	38.34	0	0.03	36.61	K03173	TRAF2; TNF receptor-associated factor 2 [EC:2.3.2.27]	transferase
cluster_13335	North_Plume	North_Marine	North_Marine	2.57	38.23	2	0.03	35.67	K03687	GRPE; molecular chaperone GrpE	chaperone
cluster_88728	North_Plume	North_Marine	North_Marine	62.96	85.2	3	0.04	22.24	K07659	ompR; two-component system, OmpR family, phosphate regulon response regulator OmpR	signal transduction
